# Supplementary material for: Metabolic traits specific for lipid-overproducing strain of Mucor circinelloides WJ11 identified by genome-scale modeling approach
Source: PeerJ. 2019 Jun 7;7:e7015. doi: 10.7717/peerj.7015 (PMC6613434; doi:10.7717/peerj.7015)
Supplement: File S1 — Table S1.1: The GEM of M. circinelloides WJ11 (iNI1159). Table S1.2: List of metabolite name, description and compartment of the iNI1159 model. Table S1.3: List of improved annotated genes in the i NI1159 model. Table S1.4: Table S1.4: List of added/updated EC numbers in the iNI1159 model. [file peerj-07-7015-s001.xlsx]

## Sheet: Metabolic network of iNI1159
Supplementary File 1: Detailed GPR information of model iNI1159
Table S1.1: The GEM of M. circinelloides WJ11 (iNI1159)
Rxn name	Biochemical reaction	Gene-reaction association	Gene	Protein function	EC number	Subsystem	Comments
r1	DGLC[e] <=> 0.33 GLC[e] + 0.67 bDGLC[e]			Spontaneous conversion		Glucose conversion
r2	DGLC[c] <=> 0.33 GLC[c] + 0.67 bDGLC[c]			Spontaneous conversion		Glucose conversion
r3	GLC[e] <=> bDGLC[e]	evm.model.scaffold00044.32	evm.model.scaffold00044.32	Aldose 1-epimerase	5.1.3.3	Glucose conversion
r4	GLC[c] <=> bDGLC[c]	evm.model.scaffold00044.32	evm.model.scaffold00044.32	Aldose 1-epimerase	5.1.3.3	Glucose conversion
r5	GLC[b] + ATP[b] -> ADP[b] + G6P[b]	evm.model.scaffold00021.35;evm.model.scaffold00086.19	evm.model.scaffold00021.35;evm.model.scaffold00086.19	Hexokinase	2.7.1.1	Glycolysis/gluconeogenesis
r6	GLC[c] + ATP[c] -> ADP[c] + G6P[c]	evm.model.scaffold00016.60;evm.model.scaffold00086.19;evm.model.scaffold00280.7;evm.model.scaffold00179.8;evm.model.scaffold00235.9;evm.model.scaffold00311.2;evm.model.scaffold00052.18;evm.model.scaffold00201.16;evm.model.scaffold00227.14;evm.model.scaffold00018.58	evm.model.scaffold00016.60;evm.model.scaffold00086.19;evm.model.scaffold00280.7;evm.model.scaffold00179.8;evm.model.scaffold00235.9;evm.model.scaffold00311.2;evm.model.scaffold00052.18;evm.model.scaffold00201.16;evm.model.scaffold00227.14;evm.model.scaffold00018.58	Hexokinase	2.7.1.1	Glycolysis/gluconeogenesis
r7	FRU[c] + ATP[c] -> ADP[c] + FRU1P[c]	evm.model.scaffold00119.16	evm.model.scaffold00119.16	Ketohexokinase	2.7.1.3	Glycolysis/gluconeogenesis
r8	FRU[b] + ATP[b] -> ADP[b] + FRU1P[b]	evm.model.scaffold00003.12	evm.model.scaffold00003.12	Ketohexokinase	2.7.1.3	Glycolysis/gluconeogenesis
r9	G6P[c] <=> F6P[c]	evm.model.scaffold00020.14	evm.model.scaffold00020.14	Glucose-6-phosphate isomerase	5.3.1.9	Glycolysis/gluconeogenesis
r10	G6P[c] <=> bDG6P[c]	evm.model.scaffold00296.15	evm.model.scaffold00296.15	Glucose-6-phosphate 1-epimerase	5.1.3.15	Glycolysis/gluconeogenesis
r11	ATP[c] + F6P[c] -> ADP[c] + FDP[c]	evm.model.scaffold00313.2;evm.model.scaffold00009.18	evm.model.scaffold00313.2;evm.model.scaffold00009.18	Phosphofructokinase	2.7.1.11	Glycolysis/gluconeogenesis
r12	FDP[c] <=> T3P2[c] + T3P1[c]	evm.model.scaffold00089.37;evm.model.scaffold00103.29	evm.model.scaffold00089.37;evm.model.scaffold00103.29	Fructose-bisphosphate aldolase	4.1.2.13	Glycolysis/gluconeogenesis
r13	T3P2[c] <=> T3P1[c]	evm.model.scaffold00022.4	evm.model.scaffold00022.4	Triosephosphate isomerase	5.3.1.1	Glycolysis/gluconeogenesis
r14	T3P1[c] + PI[c] + NAD[c] <=> 13PDG[c] + NADH[c]	evm.model.scaffold00099.10;evm.model.scaffold00115.26;evm.model.scaffold00230.13	evm.model.scaffold00099.10;evm.model.scaffold00115.26;evm.model.scaffold00230.13	Glyceraldehyde-3-phosphate dehydrogenase	1.2.1.12	Glycolysis/gluconeogenesis
r15	ADP[c] + 13PDG[c] <=> ATP[c] + 3PG[c]	evm.model.scaffold00725.1;evm.model.scaffold00172.14	evm.model.scaffold00725.1;evm.model.scaffold00172.14	Phosphoglycerate kinase	2.7.2.3	Glycolysis/gluconeogenesis
r16	3PG[c] <=> 2PG[c]	evm.model.scaffold00493.1	evm.model.scaffold00493.1	Phosphoglycerate mutase	5.4.2.1	Glycolysis/gluconeogenesis
r17	2PG[c] <=> PEP[c] + H2O[c]	evm.model.scaffold00045.42;evm.model.scaffold00194.17	evm.model.scaffold00045.42;evm.model.scaffold00194.17	Enolase	4.2.1.11	Glycolysis/gluconeogenesis
r18	ADP[c] + PEP[c] -> ATP[c] + PYR[c]	evm.model.scaffold00144.14;evm.model.scaffold00213.4	evm.model.scaffold00144.14;evm.model.scaffold00213.4	Pyruvate kinase	2.7.1.40	Glycolysis/gluconeogenesis
r19	FDP[c] + H2O[c] -> F6P[c] + PI[c]	evm.model.scaffold00159.13;evm.model.scaffold00146.6	evm.model.scaffold00159.13;evm.model.scaffold00146.6	Fructose-1,6-bisphosphatase	3.1.3.11	Glycolysis/gluconeogenesis
r20	ATP[c] + OA[c] -> ADP[c] + PEP[c] + CO2[c]	evm.model.scaffold00002.27;evm.model.scaffold00469.2;evm.model.scaffold00215.14	evm.model.scaffold00002.27;evm.model.scaffold00469.2;evm.model.scaffold00215.14	Phosphoenolpyruvate carboxykinase (ATP)	4.1.1.49	Glycolysis/gluconeogenesis
r21	ETH[c] + NADP[c] <=> ACAL[c] + NADPH[c]	evm.model.scaffold00322.4	evm.model.scaffold00322.4	NADP-dependent alcohol dehydrogenase	1.1.1.2	Glycolysis/gluconeogenesis
r22	ETH[c] + NAD[c] <=> NADH[c] + ACAL[c]	evm.model.scaffold00219.10	evm.model.scaffold00219.10	NAD-dependent alcohol dehydrogenase	1.1.1.1	Glycolysis/gluconeogenesis
r23	ETH[m] + NAD[m] <=> ACAL[m] + NADH[m]	evm.model.scaffold00221.22	evm.model.scaffold00221.22	NAD-dependent alcohol dehydrogenase	1.1.1.1	Glycolysis/gluconeogenesis
r24	NADP[c] + GL[c] <=> NADPH[c] + GLYAL[c]	evm.model.scaffold00322.4	evm.model.scaffold00322.4	NADP-dependent alcohol dehydrogenase	1.1.1.2	Glycolysis/gluconeogenesis
r25	NAD[c] + GL[c] <=> NADH[c] + GLYAL[c]	evm.model.scaffold00219.10	evm.model.scaffold00219.10	NAD-dependent alcohol dehydrogenase	1.1.1.1	Glycolysis/gluconeogenesis
r26	NAD[m] + GL[m] <=> NADH[m] + GLYAL[m]	evm.model.scaffold00221.22	evm.model.scaffold00221.22	NAD-dependent alcohol dehydrogenase	1.1.1.1	Glycolysis/gluconeogenesis
r27	GL[e] + NAD[e] <=> GLYAL[e] + NADH[e]	evm.model.scaffold00221.22	evm.model.scaffold00221.22	NAD-dependent alcohol dehydrogenase	1.1.1.1	Glycolysis/gluconeogenesis
r28	NAD[c] + GL[c] <=> NADH[c] + GLYAL[c]	evm.model.scaffold00050.50	evm.model.scaffold00050.50	NAD-dependent alcohol dehydrogenase	1.1.1.1	Glycolysis/gluconeogenesis
r29	NAD[m] + PYR[m] + COA[m] -> NADH[m] + ACCOA[m] + CO2[m]	evm.model.scaffold00005.11: evm.model.scaffold00028.35	evm.model.scaffold00005.11: evm.model.scaffold00028.35	Pyruvate dehydrogenase complex	1.2.4.1: 2.3.1.12: 1.8.1.4	Glycolysis/gluconeogenesis
r30	bDG6P[c] + NADP[c] -> NADPH[c] + D6PGL[c]	evm.model.scaffold00081.31; evm.model.scaffold00402.1;evm.model.scaffold00053.31;evm.model.scaffold00034.42	evm.model.scaffold00081.31; evm.model.scaffold00402.1;evm.model.scaffold00053.31;evm.model.scaffold00034.42	Glucose-6-phosphate 1-dehydrogenase	1.1.1.49	Pentose-phosphate pathway
r31	H2O[c] + D6PGL[c] -> D6PGC[c]	evm.model.scaffold00275.7; evm.model.scaffold00087.15	evm.model.scaffold00275.7; evm.model.scaffold00087.15	6-phosphoglucolactonase	3.1.1.31	Pentose-phosphate pathway
r32	D6PGL[e] + H2O[e] -> D6PGC[e]	evm.model.scaffold00087.15	evm.model.scaffold00087.15	6-phosphoglucolactonase	3.1.1.31	Pentose-phosphate pathway
r33	NADP[c] + D6PGC[c] -> CO2[c] + NADPH[c] + RL5P[c]	evm.model.scaffold00113.18;evm.model.scaffold00142.5	evm.model.scaffold00113.18;evm.model.scaffold00142.5	Phosphogluconate dehydrogenase (decarboxylating)	1.1.1.44	Pentose-phosphate pathway
r34	RL5P[c] <=> XUL5P[c]	evm.model.scaffold00011.46	evm.model.scaffold00011.46	Ribulose-phosphate 3-epimerase	5.1.3.1	Pentose-phosphate pathway
r35	RL5P[c] <=> R5P[c]	evm.model.scaffold00076.4;evm.model.scaffold00111.26;evm.model.scaffold00167.10	evm.model.scaffold00076.4;evm.model.scaffold00111.26;evm.model.scaffold00167.10	Ribose 5-phosphate isomerase	5.3.1.6	Pentose-phosphate pathway
r36	XUL5P[c] + R5P[c] <=> T3P1[c] + S7P[c]	evm.model.scaffold00065.38;evm.model.scaffold00154.22	evm.model.scaffold00065.38;evm.model.scaffold00154.22	Transketolase	2.2.1.1	Pentose-phosphate pathway
r37	XUL5P[c] + E4P[c] <=> F6P[c] + T3P1[c]	evm.model.scaffold00065.38;evm.model.scaffold00154.22	evm.model.scaffold00065.38;evm.model.scaffold00154.22	Transketolase	2.2.1.1	Pentose-phosphate pathway
r38	T3P1[c] + S7P[c] <=> F6P[c] + E4P[c]	evm.model.scaffold00002.30; evm.model.scaffold00233.9	evm.model.scaffold00002.30; evm.model.scaffold00233.9	Transaldolase	2.2.1.2	Pentose-phosphate pathway
r39	DEORIPI[c] <=> T3P1[c] + ACAL[c]	evm.model.scaffold00032.51	evm.model.scaffold00032.51	Deoxyribose-phosphate aldolase	4.1.2.4	Pentose-phosphate pathway
r40	ATP[c] + RIB[c] -> ADP[c] + R5P[c]	evm.model.scaffold00021.38	evm.model.scaffold00021.38	Ribokinase	2.7.1.15	Pentose-phosphate pathway
r41	ATP[c] + GLCNT[c] -> ADP[c] + D6PGC[c]	evm.model.scaffold00142.19	evm.model.scaffold00142.19	Glucokinase	2.7.1.12	Pentose-phosphate pathway
r42	R5P[c] <=> R1P[c]	evm.model.scaffold00217.16;evm.model.scaffold00036.15;evm.model.scaffold00217.16	evm.model.scaffold00217.16;evm.model.scaffold00036.15;evm.model.scaffold00217.16	Phosphoglucomutase	5.4.2.2	Pentose-phosphate pathway
r43	DR1P[c] <=> DEORIPI[c]	evm.model.scaffold00217.16	evm.model.scaffold00217.16	phosphopentomutase	5.4.2.7	Pentose-phosphate pathway
r44	ACCOA[m] + H2O[m] + OA[m] <=> COA[m] + CIT[m]	evm.model.scaffold00181.16	evm.model.scaffold00181.16	Citrate synthase	2.3.3.1	Tricarboxylic acid cycle
r45	CIT[m] <=> H2O[m] + ACO[m]	evm.model.scaffold00272.9;evm.model.scaffold00050.5;evm.model.scaffold00118.17;evm.model.scaffold00041.30	evm.model.scaffold00272.9;evm.model.scaffold00050.5;evm.model.scaffold00118.17;evm.model.scaffold00041.30	Aconitate hydratase	4.2.1.3	Tricarboxylic acid cycle
r46	CIT[c] <=> H2O[c] + ACO[c]	evm.model.scaffold00050.5;evm.model.scaffold00118.17;evm.model.scaffold00041.30	evm.model.scaffold00050.5;evm.model.scaffold00118.17;evm.model.scaffold00041.30	Aconitate hydratase	4.2.1.3	Tricarboxylic acid cycle
r47	ACO[m] + H2O[m] <=> ICIT[m]	evm.model.scaffold00272.9;evm.model.scaffold00050.5;evm.model.scaffold00118.17;evm.model.scaffold00041.30	evm.model.scaffold00272.9;evm.model.scaffold00050.5;evm.model.scaffold00118.17;evm.model.scaffold00041.30	Aconitate hydratase	4.2.1.3	Tricarboxylic acid cycle
r48	ACO[c] + H2O[c] <=> ICIT[c]	evm.model.scaffold00050.5;evm.model.scaffold00118.17;evm.model.scaffold00041.30	evm.model.scaffold00050.5;evm.model.scaffold00118.17;evm.model.scaffold00041.30	Aconitate hydratase	4.2.1.3	Tricarboxylic acid cycle
r49	NAD[m] + ICIT[m] -> NADH[m] + CO2[m] + AKG[m]	evm.model.scaffold00170.12;evm.model.scaffold00330.3;evm.model.scaffold00008.30;evm.model.scaffold00166.9	evm.model.scaffold00170.12;evm.model.scaffold00330.3;evm.model.scaffold00008.30;evm.model.scaffold00166.9	NAD-dependent isocitrate dehydrogenase	1.1.1.41	Tricarboxylic acid cycle
r50	NADP[c] + ICIT[c] -> CO2[c] + NADPH[c] + AKG[c]	evm.model.scaffold00018.42; evm.model.scaffold00028.30	evm.model.scaffold00018.42; evm.model.scaffold00028.30	NADP-dependent isocitrate dehydrogenase	1.1.1.42	Tricarboxylic acid cycle
r51	NAD[m] + COA[m] + AKG[m] -> NADH[m] + CO2[m] + SUCCOA[m]	evm.model.scaffold00215.12: evm.model.scaffold00752.1	evm.model.scaffold00215.12: evm.model.scaffold00752.1	2-oxoglutarate dehydrogenase complex	1.2.4.2: 2.3.1.61: 1.8.1.4	Tricarboxylic acid cycle
r52	NAD[c] + COA[c] + AKG[c] -> NADH[c] + CO2[c] + SUCCOA[c]	evm.model.scaffold00215.12: evm.model.scaffold00752.1	evm.model.scaffold00215.12: evm.model.scaffold00752.1	2-oxoglutarate dehydrogenase complex	1.2.4.2: 2.3.1.61: 1.8.1.4	Tricarboxylic acid cycle
r53	SUCCOA[m] + PI[m] + ADP[m] <=> COA[m] + SUCC[m] + ATP[m]	evm.model.scaffold00149.23;evm.model.scaffold00019.26	evm.model.scaffold00149.23;evm.model.scaffold00019.26	Succinate-CoA ligase (ADP-forming)	6.2.1.5	Tricarboxylic acid cycle
r54	SUCC[m] + Q[m] <=> FUM[m] + QH2[m]	evm.model.scaffold00012.58;evm.model.scaffold00095.12;evm.model.scaffold00093.26;evm.model.scaffold00103.21	evm.model.scaffold00012.58;evm.model.scaffold00095.12;evm.model.scaffold00093.26;evm.model.scaffold00103.21	Succinate dehydrogenase (ubiquinone)	1.3.5.1	Tricarboxylic acid cycle
r55	FUM[c] + FADH2[m] -> SUCC[c] + FAD[m]	evm.model.scaffold00057.1	evm.model.scaffold00057.1	Fumarate reductase (flavoprotein subunit)	1.3.99.1	Tricarboxylic acid cycle
r56	H2O[c] + FUM[c] <=> MAL[c]	evm.model.scaffold00034.48	evm.model.scaffold00034.48	Fumarate hydratase	4.2.1.2	Tricarboxylic acid cycle
r57	H2O[m] + FUM[m] <=> MAL[m]	evm.model.scaffold00034.48;evm.model.scaffold00001.116	evm.model.scaffold00034.48;evm.model.scaffold00001.116	Fumarate hydratase	4.2.1.2	Tricarboxylic acid cycle
r58	NAD[m] + MAL[m] <=> NADH[m] + OA[m]	evm.model.scaffold00273.1	evm.model.scaffold00273.1	NAD-dependent malate dehydrogenase	1.1.1.37	Tricarboxylic acid cycle
r59	NAD[c] + MAL[c] <=> NADH[c] + OA[c]	evm.model.scaffold00273.1;evm.model.scaffold00042.38; evm.model.scaffold00042.38; evm.model.scaffold00031.38	evm.model.scaffold00273.1;evm.model.scaffold00042.38; evm.model.scaffold00042.38; evm.model.scaffold00031.38	NAD-dependent malate dehydrogenase	1.1.1.37	Tricarboxylic acid cycle	Added reaction
r60	NAD[p] + MAL[p] <=> NADH[p] + OA[p]	evm.model.scaffold00273.1	evm.model.scaffold00273.1	NAD-dependent malate dehydrogenase	1.1.1.37	Tricarboxylic acid cycle
r61	CIT[c] <=> OA[c] + AC[c]	evm.model.scaffold00083.28	evm.model.scaffold00083.28	Citrate lyase	4.1.3.6	Tricarboxylic acid cycle
r62	ATP[c] + COA[c] + CIT[c] -> ADP[c] + PI[c] + OA[c] + ACCOA[c]	evm.model.scaffold00037.10	evm.model.scaffold00037.10	ATP citrate synthase	2.3.3.8	Tricarboxylic acid cycle
r63	ACCOA[p] + H2O[p] + GLX[p] -> MAL[p] + COA[p]	evm.model.scaffold00135.19	evm.model.scaffold00135.19	Malate synthase	2.3.3.9	Glyoxylate metabolism
r64	ACCOA[m] + H2O[m] + GLX[m] -> COA[m] + MAL[m]	evm.model.scaffold00135.19	evm.model.scaffold00135.19	Malate synthase	2.3.3.9	Glyoxylate metabolism
r65	ACCOA[c] + H2O[c] + GLX[c] -> COA[c] + MAL[c]	evm.model.scaffold00076.26	evm.model.scaffold00076.26	Malate synthase	2.3.3.9	Glyoxylate metabolism
r66	ICIT[p] -> GLX[p] + SUCC[p]	evm.model.scaffold00022.71;evm.model.scaffold00151.11	evm.model.scaffold00022.71;evm.model.scaffold00151.11	Isocitrate lyase	4.1.3.1	Glyoxylate metabolism
r67	ICIT[b] -> GLX[b] + SUCC[b]	evm.model.scaffold00022.71;evm.model.scaffold00151.11	evm.model.scaffold00022.71;evm.model.scaffold00151.11	Isocitrate lyase	4.1.3.1	Glyoxylate metabolism
r68	GLYCOLA[c] + NAD[c] <=> GLX[c] + NADH[c]	evm.model.scaffold00063.15; evm.model.scaffold00005.69	evm.model.scaffold00063.15; evm.model.scaffold00005.69	glyoxylate reductase (NADH)	1.1.1.26	Glyoxylate metabolism
r69	HXPYR[c] + NADH[c] -> GLYCTE[c] + NAD[c]	evm.model.scaffold00063.15; evm.model.scaffold00005.69	evm.model.scaffold00063.15; evm.model.scaffold00005.69	glyoxylate reductase (NADH)	1.1.1.26	Glyoxylate metabolism
r70	GLYCOLA[c] + NADP[c] <=> GLX[c] + NADPH[c]	evm.model.scaffold00063.15; evm.model.scaffold00005.69	evm.model.scaffold00063.15; evm.model.scaffold00005.69	glyoxylate reductase (NADPH)	1.1.1.26	Glyoxylate metabolism
r71	HXPYR[c] + NADPH[c] -> GLYCTE[c] + NADP[c]	evm.model.scaffold00063.15; evm.model.scaffold00005.69	evm.model.scaffold00063.15; evm.model.scaffold00005.69	glyoxylate reductase (NADPH)	1.1.1.26	Glyoxylate metabolism
r72	PYR[c] -> CO2[c] + ACAL[c]	evm.model.scaffold00145.9;evm.model.scaffold00167.6;evm.model.scaffold00335.3;evm.model.scaffold00020.45;evm.model.scaffold00021.41	evm.model.scaffold00145.9;evm.model.scaffold00167.6;evm.model.scaffold00335.3;evm.model.scaffold00020.45;evm.model.scaffold00021.41	Pyruvate decarboxylase	4.1.1.1	Pyruvate metabolism
r73	PYR[b] -> CO2[b] + ACAL[b]	evm.model.scaffold00020.45	evm.model.scaffold00020.45	Pyruvate decarboxylase	4.1.1.1	Pyruvate metabolism
r74	RGT[c] + MTHGXL[c] <=> LGT[c]	evm.model.scaffold00021.55;evm.model.scaffold00150.18	evm.model.scaffold00021.55;evm.model.scaffold00150.18	Lactoylglutathione lyase	4.4.1.5	Pyruvate metabolism
r75	LGT[c] + H2O[c] -> RGT[c] + LAC[c]	evm.model.scaffold00145.17; evm.model.scaffold00141.28;evm.model.scaffold00057.5;evm.model.scaffold00286.11	evm.model.scaffold00145.17; evm.model.scaffold00141.28;evm.model.scaffold00057.5;evm.model.scaffold00286.11	Hydroxyacylglutathione hydrolase	3.1.2.6	Pyruvate metabolism
r76	LGT[e] + H2O[e] -> RGT[e] + LAC[e]	evm.model.scaffold00141.28	evm.model.scaffold00141.28	Hydroxyacylglutathione hydrolase	3.1.2.6	Pyruvate metabolism
r77	ATP[c] + COA[c] + AC[c] -> ACCOA[c] + AMP[c] + PPI[c]	evm.model.scaffold00157.12,evm.model.scaffold00171.19,evm.model.scaffold00031.36,evm.model.scaffold00025.28,evm.model.scaffold00008.26	evm.model.scaffold00157.12,evm.model.scaffold00171.19,evm.model.scaffold00031.36,evm.model.scaffold00025.28,evm.model.scaffold00008.26	Acetyl-coenzyme A synthetase	6.2.1.1	Pyruvate metabolism
r78	ATP[p] + COA[p] + AC[p] -> ACCOA[p] + AMP[p] + PPI[p]	evm.model.scaffold00008.26	evm.model.scaffold00008.26	acetyl-coenzyme A synthetase	6.2.1.1	Pyruvate metabolism
r79	NAD[c] + ACAL[c] + H2O[c] <=> NADH[c] + AC[c]	evm.model.scaffold00054.16; evm.model.scaffold00208.10;evm.model.scaffold00121.28	evm.model.scaffold00054.16; evm.model.scaffold00208.10;evm.model.scaffold00121.28	NAD-dependent aldehyde dehydrogenase	1.2.1.3	Pyruvate metabolism
r80	NAD[m] + ACAL[m] + H2O[m] <=> NADH[m] + AC[m]	evm.model.scaffold00028.8	evm.model.scaffold00028.8	NAD-dependent aldehyde dehydrogenase	1.2.1.3	Pyruvate metabolism
r81	NAD[e] + ACAL[e] + H2O[e] <=> NADH[e] + AC[e]	evm.model.scaffold00140.7	evm.model.scaffold00140.7	NAD-dependent aldehyde dehydrogenase	1.2.1.3	Pyruvate metabolism
r82	NADP[b] + ACAL[b] + H2O[b] <=> AC[b] + NADPH[b]	evm.model.scaffold00039.62	evm.model.scaffold00039.62	NADP-dependent aldehyde dehydrogenase	1.2.1.5	Pyruvate metabolism
r83	NADP[m] + ACAL[m] + H2O[m] <=> AC[m] + NADPH[m]	evm.model.scaffold00039.62	evm.model.scaffold00039.62	NADP-dependent aldehyde dehydrogenase	1.2.1.5	Pyruvate metabolism
r84	NAD[c] + HYGTA[c] -> NADH[c] + FGT[c]	evm.model.scaffold00050.50	evm.model.scaffold00050.50	S-(hydroxymethyl)glutathione dehydrogenase	1.1.1.1	Pyruvate metabolism
r85	H2O[c] + ACCOA[c] -> COA[c] + AC[c]	evm.model.scaffold00344.6; evm.model.scaffold00131.6	evm.model.scaffold00344.6; evm.model.scaffold00131.6	Acetyl-CoA hydrolase	3.1.2.1	Pyruvate metabolism
r86	NAD[c] + METHOL[c] <=> NADH[c] + FALD[c]	evm.model.scaffold00219.10	evm.model.scaffold00219.10	NAD-dependent alcohol dehydrogenase	1.1.1.1	Pyruvate metabolism
r87	NAD[m] + METHOL[m] <=> NADH[m] + FALD[m]	evm.model.scaffold00221.22	evm.model.scaffold00221.22	NAD-dependent alcohol dehydrogenase	1.1.1.1	Pyruvate metabolism
r88	NAD[e] + METHOL[e] <=> NADH[e] + FALD[e]	evm.model.scaffold00221.22	evm.model.scaffold00221.22	NAD-dependent alcohol dehydrogenase	1.1.1.1	Pyruvate metabolism
r89	ATP[c] + PYR[c] + HCO3[c] -> ADP[c] + PI[c] + OA[c]	evm.model.scaffold00276.17;evm.model.scaffold00058.14;evm.model.scaffold00051.21	evm.model.scaffold00276.17;evm.model.scaffold00058.14;evm.model.scaffold00051.21	Pyruvate carboxylase	6.4.1.1	Pyruvate metabolism
r90	MAL[c] + NADP[c] -> PYR[c] + CO2[c] + NADPH[c]	evm.model.scaffold00036.12	evm.model.scaffold00036.12	NADP-dependent malic enzyme	1.1.1.40	Pyruvate metabolism
r91	MAL[m] + NADP[m] -> PYR[m] + CO2[m] + NADPH[m]	evm.model.scaffold00014.40	evm.model.scaffold00014.40	NADP-dependent malic enzyme	1.1.1.40	Pyruvate metabolism
r92	MAL[m] + NAD[m] -> PYR[m] + CO2 [m]+ NADH[m]	evm.model.scaffold00188.29;evm.model.scaffold00295.10	evm.model.scaffold00188.29;evm.model.scaffold00295.10	malate dehydrogenase (oxaloacetate-decarboxylating)	1.1.1.38	Pyruvate metabolism	Updated reaction
r93	NAD[c] + LLAC[c] -> NADH[c] + PYR[c]	evm.model.scaffold00020.30	evm.model.scaffold00020.30	L-lactate dehydrogenase	1.1.1.27	Pyruvate metabolism
r94	LLAC[c] + 2 FERI[c] -> PYR[c] + 2 FERO[c]	evm.model.scaffold00079.28	evm.model.scaffold00079.28	Lactic acid dehydrogenase	1.1.2.3	Pyruvate metabolism
r95	2 NAD[c] + H2O[c] + UDPG[c] -> 2 NADH[c] + UDPGE[c]	evm.model.scaffold00150.13	evm.model.scaffold00150.13	UDP-glucose dehydrogenase	1.1.1.22	Pentose and glucuronate interconversions
r96	H2O[c] + UDPGE[c] -> UDP[c] + GLUCRE[c]	evm.model.scaffold00028.44; evm.model.scaffold00001.107; evm.model.scaffold00028.12; evm.model.scaffold00123.12; evm.model.scaffold00212.14; evm.model.scaffold00032.62; evm.model.scaffold00178.15; evm.model.scaffold00219.12	evm.model.scaffold00028.44; evm.model.scaffold00001.107; evm.model.scaffold00028.12; evm.model.scaffold00123.12; evm.model.scaffold00212.14; evm.model.scaffold00032.62; evm.model.scaffold00178.15; evm.model.scaffold00219.12	UDP-glucurosyltransferase	2.4.1.17	Pentose and glucuronate interconversions
r97	H2O[m] + UDPGE[m] -> UDP[m] + GLUCRE[m]	evm.model.scaffold00001.107	evm.model.scaffold00001.107	UDP-glucurosyltransferase	2.4.1.17	Pentose and glucuronate interconversions
r98	H2O[p] + UDPGE[p] -> UDP[p] + GLUCRE[p]	evm.model.scaffold00123.12	evm.model.scaffold00123.12	UDP-glucurosyltransferase	2.4.1.17	Pentose and glucuronate interconversions
r99	H2O[b] + UDPGE[b] -> UDP[b] + GLUCRE[b]	evm.model.scaffold00028.44; evm.model.scaffold00001.107; evm.model.scaffold00028.12; evm.model.scaffold00123.12; evm.model.scaffold00212.14; evm.model.scaffold00032.62; evm.model.scaffold00178.15; evm.model.scaffold00219.12	evm.model.scaffold00028.44; evm.model.scaffold00001.107; evm.model.scaffold00028.12; evm.model.scaffold00123.12; evm.model.scaffold00212.14; evm.model.scaffold00032.62; evm.model.scaffold00178.15; evm.model.scaffold00219.12	UDP-glucurosyltransferase	2.4.1.17	Pentose and glucuronate interconversions
r100	NAD[e] + DEXG[e] <=> NADH[e] + DEHXG[e]	evm.model.scaffold00175.16	evm.model.scaffold00175.16	2-deoxy-D-gluconate 3-dehydrogenase	1.1.1.125	Pentose and glucuronate interconversions
r101	NAD[m] + DEXG[m] <=> NADH[m] + DEHXG[m]	evm.model.scaffold00034.66	evm.model.scaffold00034.66	2-deoxy-D-gluconate 3-dehydrogenase	1.1.1.125	Pentose and glucuronate interconversions
r102	NAD[c] + DEXG[c] <=> NADH[c] + DEHXG[c]	evm.model.scaffold00140.1	evm.model.scaffold00140.1	2-deoxy-D-gluconate 3-dehydrogenase	1.1.1.125	Pentose and glucuronate interconversions
r103	H2O[c] + FGT[c] <=> RGT[c] + FOR[c]	evm.model.scaffold00306.5	evm.model.scaffold00306.5	Esterase	3.1.2.12	Pentose and glucuronate interconversions
r104	LAC[c] + 2 FERI[c] -> PYR[c] + 2 FERO[c]	evm.model.scaffold00200.14	evm.model.scaffold00200.14	D-Lactate dehydrogenase (cytochrome)	1.1.2.4	Pentose and glucuronate interconversions
r105	LAC[m] + 2 FERI[m] -> PYR[m] + 2 FERO[m]	evm.model.scaffold00008.33;evm.model.scaffold00007.32	evm.model.scaffold00008.33;evm.model.scaffold00007.32	D-Lactate dehydrogenase (cytochrome)	1.1.2.4	Pentose and glucuronate interconversions
r106	PTATE[e] -> GALUNT[e]	evm.model.scaffold00122.25	evm.model.scaffold00122.25	Polygalacturonase	3.2.1.15	Pentose and glucuronate interconversions
r107	PTATE[e] -> DGALNT[e]	evm.model.scaffold00122.25	evm.model.scaffold00122.25	Polygalacturonase	3.2.1.15	Pentose and glucuronate interconversions
r108	DGALNT[e] -> GALUNT[e]	evm.model.scaffold00091.29	evm.model.scaffold00091.29	galacturan 1,4-alpha-galacturonidase	3.2.1.67	Pentose and glucuronate interconversions
r109	ATP[c] + COA[c] + PROP[c] -> AMP[c] + PPI[c] + PROPCOA[c]	evm.model.scaffold00008.26	evm.model.scaffold00008.26	Propanoyl CoA synthase	6.2.1.1	Propanoate and butanoate metabolism
r110	ATP[m] + PROPCOA[m] + HCO3[m] -> PI[m] + ADP[m] + MMCOA[m]	evm.model.scaffold00225.11;evm.model.scaffold00009.23	evm.model.scaffold00225.11;evm.model.scaffold00009.23	Propionyl-CoA carboxylase	6.4.1.3	Propanoate and butanoate metabolism
r111	ATP[p] + PROPCOA[p] + HCO3[p] -> ADP[p] + PI[p] + MMCOA[p]	evm.model.scaffold00173.7	evm.model.scaffold00173.7	Propionyl-CoA carboxylase	6.4.1.3	Propanoate and butanoate metabolism
r112	SAM[c] -> ACPC[c] + 5MTA[c]	evm.model.scaffold00344.3	evm.model.scaffold00344.3	1-amicyclopropane-1-carboxylate synthase	4.4.1.14	Propanoate and butanoate metabolism
r113	SAM[b] -> ACPC[b] + 5MTA[b]	evm.model.scaffold00344.3	evm.model.scaffold00344.3	1-amicyclopropane-1-carboxylate synthase	4.4.1.14	Propanoate and butanoate metabolism
r114	ATP[c] + COA[c] + ACTAC[c] -> AMP[c] + PPI[c] + AACCOA[c]	evm.model.scaffold00124.2	evm.model.scaffold00124.2	Acetoacetyl-CoA synthase	6.2.1.16	Propanoate and butanoate metabolism
r115	NADP[m] + C4HCOA[m] <=> NADPH[m] + AACCOA[m]	evm.model.scaffold00160.19	evm.model.scaffold00160.19	3-hydroxybutyryl-CoA dehydrogenase	1.1.1.157	Propanoate and butanoate metabolism
r116	FAD[m] + HYDGLR[m] <=> AKG[m] + FADH2[m]	evm.model.scaffold00004.14;evm.model.scaffold00018.3	evm.model.scaffold00004.14;evm.model.scaffold00018.3	2-hydroxyglutarate dehydrogenase	1.1.99.2	Propanoate and butanoate metabolism
r117	H2O[m] + CRONYLCOA[m] <=> C4HCOA_R[m]	Gap	Gap	3-hydroxybutyryl-CoA dehydratase	4.2.1.55	Propanoate and butanoate metabolism
r118	C4HCOA_R[m] <=> C4HCOA[m]	Gap	Gap	3-hydroxybutyryl-CoA epimerase	4.2.1.55	Propanoate and butanoate metabolism
r119	CRONYLCOA[m] <=> C4HCOA[m]	evm.model.scaffold00329.7	evm.model.scaffold00329.7	Enoyl-CoA hydratase	4.2.1.17	Propanoate and butanoate metabolism
r120	CRONYLCOA[c] <=> C4HCOA[c]	evm.model.scaffold00245.4	evm.model.scaffold00245.4	Enoyl-CoA hydratase	4.2.1.17	Propanoate and butanoate metabolism
r121	MALCOA[c] -> ACCOA[c] + CO2[c]	evm.model.scaffold00168.20	evm.model.scaffold00168.20	Malonyl-CoA decarboxylase	4.1.1.9	Propanoate and butanoate metabolism
r122	MICIT[p] <=> PYR[p] + SUCC[p]	evm.model.scaffold00022.71;evm.model.scaffold00151.11	evm.model.scaffold00022.71;evm.model.scaffold00151.11	methylisocitrate lyase	4.1.3.1	Propanoate metabolism
r123	ATP[c] + GLAC[c] -> ADP[c] + GAL1P[c]	evm.model.scaffold00268.2	evm.model.scaffold00268.2	Galactokinase	2.7.1.6	Galactose metabolism
r124	UDPGAL[c] <=> UDPG[c]	evm.model.scaffold00092.5;evm.model.scaffold00201.17	evm.model.scaffold00092.5;evm.model.scaffold00201.17	UDP-glucose 4-epimerase	5.1.3.2	Galactose metabolism
r125	UDPGAL[m] <=> UDPG[m]	evm.model.scaffold00092.5	evm.model.scaffold00092.5	UDP-glucose 4-epimerase	5.1.3.2	Galactose metabolism
r126	G1P[c] + UTP[c] <=> PPI[c] + UDPG[c]	evm.model.scaffold00117.9;evm.model.scaffold00193.26;evm.model.scaffold00100.31	evm.model.scaffold00117.9;evm.model.scaffold00193.26;evm.model.scaffold00100.31	UDP glucose Pyrophosphorylase	2.7.7.9	Galactose metabolism
r127	UDPGE[m] -> CO2[m] + UDPXYL[m]	evm.model.scaffold00213.11;evm.model.scaffold00213.12	evm.model.scaffold00213.11;evm.model.scaffold00213.12	UDP-glucuronate decarboxylase	4.1.1.35	Galactose metabolism
r128	UDPGE[c] -> CO2[c] + UDPXYL[c]	evm.model.scaffold00213.11;evm.model.scaffold00213.12	evm.model.scaffold00213.11;evm.model.scaffold00213.12	UDP-glucuronate decarboxylase	4.1.1.35	Galactose metabolism
r129	G6P[c] <=> G1P[c]	evm.model.scaffold00217.16;evm.model.scaffold00036.15;evm.model.scaffold00217.16	evm.model.scaffold00217.16;evm.model.scaffold00036.15;evm.model.scaffold00217.16	Phosphoglucomutase	5.4.2.2	Galactose metabolism
r130	UDPG[c] + GAL1P[c] <=> G1P[c] + UDPGAL[c]	Gap	Gap	UDP-glucose-hexose-1-phosphate uridylyltransferase	4.2.1.55	Galactose metabolism
r131	GLAC[c] + O2[c] -> GALNT[c] + H2O2[c]	evm.model.scaffold00333.5	evm.model.scaffold00333.5	Galactose oxidase	1.1.3.9	Galactose metabolism
r132	ATP[c] + XUL[c] -> ADP[c] + XUL5P[c]	evm.model.scaffold00027.14	evm.model.scaffold00027.14	D-xylulose kinase	2.7.1.17	Pentose sugar metabolism
r133	ATP[c] + RL[c] -> ADP[c] + RL5P[c]	evm.model.scaffold00199.17	evm.model.scaffold00199.17	D-ribulokinase	2.7.1.47	Pentose sugar metabolism
r134	NAD[c] + XOL[c] <=> NADH[c] + XUL[c]	evm.model.scaffold00117.24	evm.model.scaffold00117.24	D-xylulose reductase	1.1.1.9	Pentose sugar metabolism
r135	NADP[c] + XYL[c] -> NADPH[c] + XYLLAC[c]	evm.model.scaffold00098.13	evm.model.scaffold00098.13	D-xylose 1-dehydrogenase (NADP)	1.1.1.179	Pentose sugar metabolism
r136	NADP[c] + ARAB[c] -> NADPH[c] + ARABLAC[c]	evm.model.scaffold00357.2	evm.model.scaffold00357.2	D-Arabinose 1-dehydrogenase (NAD(P))	1.1.1.117	Pentose sugar metabolism
r137	LARAB[e] + ATP[e] -> LARABP[e] + ADP[e]	evm.model.scaffold00248.9	evm.model.scaffold00248.9	L-arabinokinase	2.7.1.46	Pentose sugar metabolism
r138	NADPH[c] + XYL[c] <=> NADP[c] + XOL[c]	evm.model.scaffold00193.10	evm.model.scaffold00193.10	Aldehyde reductase	1.1.1.21	Pentose sugar metabolism
r139	NADPH[c] + XYL[c] -> NADP[c] + XOL[c]	evm.model.scaffold00150.11;evm.model.scaffold00277.5;evm.model.scaffold00358.1;evm.model.scaffold00029.1;evm.model.scaffold00029.3;evm.model.scaffold00117.24	evm.model.scaffold00150.11;evm.model.scaffold00277.5;evm.model.scaffold00358.1;evm.model.scaffold00029.1;evm.model.scaffold00029.3;evm.model.scaffold00117.24	D-xylose reductase	1.1.1.307	Pentose sugar metabolism
r140	MAN6P[c] <=> F6P[c]	evm.model.scaffold00434.1; evm.model.scaffold00434.2	evm.model.scaffold00434.1; evm.model.scaffold00434.2	Mannose-6-phosphate isomerase	5.3.1.8	Hexose sugar metabolism
r141	ATP[c] + FRU[c] -> ADP[c] + F6P[c]	evm.model.scaffold00016.60;evm.model.scaffold00086.19;evm.model.scaffold00280.7;evm.model.scaffold00179.8;evm.model.scaffold00235.9;evm.model.scaffold00311.2;evm.model.scaffold00052.18;evm.model.scaffold00201.16;evm.model.scaffold00227.14;evm.model.scaffold00018.58	evm.model.scaffold00016.60;evm.model.scaffold00086.19;evm.model.scaffold00280.7;evm.model.scaffold00179.8;evm.model.scaffold00235.9;evm.model.scaffold00311.2;evm.model.scaffold00052.18;evm.model.scaffold00201.16;evm.model.scaffold00227.14;evm.model.scaffold00018.58	Hexokinase	2.7.1.1	Hexose sugar metabolism
r142	ATP[b] + FRU[b] -> ADP[b] + F6P[b]	evm.model.scaffold00021.35;evm.model.scaffold00086.19	evm.model.scaffold00021.35;evm.model.scaffold00086.19	Hexokinase	2.7.1.1	Hexose sugar metabolism
r143	ATP[c] + F6P[c] -> ADP[c] + F26P[c]	evm.model.scaffold00010.12;evm.model.scaffold00149.10;evm.model.scaffold00019.25;evm.model.scaffold00059.34;evm.model.scaffold00083.21;evm.model.scaffold00114.14;evm.model.scaffold00086.31	evm.model.scaffold00010.12;evm.model.scaffold00149.10;evm.model.scaffold00019.25;evm.model.scaffold00059.34;evm.model.scaffold00083.21;evm.model.scaffold00114.14;evm.model.scaffold00086.31	6-phosphofructo-2-kinase	2.7.1.105	Hexose sugar metabolism
r144	F26P[c] + H2O[c] -> F6P[c] + PI[c]	evm.model.scaffold00010.12;evm.model.scaffold00149.10;evm.model.scaffold00019.25;evm.model.scaffold00059.34;evm.model.scaffold00083.21;evm.model.scaffold00114.14;evm.model.scaffold00086.31	evm.model.scaffold00010.12;evm.model.scaffold00149.10;evm.model.scaffold00019.25;evm.model.scaffold00059.34;evm.model.scaffold00083.21;evm.model.scaffold00114.14;evm.model.scaffold00086.31	Fructose-2,6-bisphosphatase	2.7.1.105	Hexose sugar metabolism
r145	FUCUL1P[c] -> T3P2[c] + LACAL[c]	evm.model.scaffold00002.55	evm.model.scaffold00002.55	L-fuculose-phosphate aldolase	4.1.2.17	Hexose sugar metabolism
r146	FUCUL1P[m] -> T3P2[m] + LACAL[m]	evm.model.scaffold00002.55	evm.model.scaffold00002.55	L-fuculose-phosphate aldolase	4.1.2.17	Hexose sugar metabolism
r147	MAN1P[c] <=> MAN6P[c]	evm.model.scaffold00008.24	evm.model.scaffold00008.24	Phosphomannomutase	5.4.2.8	Hexose sugar metabolism
r148	MAN1P[m] <=> MAN6P[m]	evm.model.scaffold00008.24	evm.model.scaffold00008.24	Phosphomannomutase	5.4.2.8	Hexose sugar metabolism
r149	GTP[c] + MAN1P[c] -> PPI[c] + GDPMAN[c]	evm.model.scaffold00110.28;evm.model.scaffold00748.1;evm.model.scaffold00100.31;evm.model.scaffold00343.2	evm.model.scaffold00110.28;evm.model.scaffold00748.1;evm.model.scaffold00100.31;evm.model.scaffold00343.2	Mannose-1-phosphate guanylyltransferase	2.7.7.13	Hexose sugar metabolism
r150	GTP[m] + MAN1P[m] -> PPI[m] + GDPMAN[m]	evm.model.scaffold00110.28;evm.model.scaffold00003.54;evm.model.scaffold00748.1	evm.model.scaffold00110.28;evm.model.scaffold00003.54;evm.model.scaffold00748.1	Mannose-1-phosphate guanylyltransferase	2.7.7.13	Hexose sugar metabolism
r151	GDPMAN[c] -> H2O[c] + GDPDDMAN[c]	evm.model.scaffold00376.1; evm.model.scaffold00078.13; evm.model.scaffold00111.5	evm.model.scaffold00376.1; evm.model.scaffold00078.13; evm.model.scaffold00111.5	GDP-mannose 4,6-dehydratase	4.2.1.47	Hexose sugar metabolism
r152	NADPH[c] + GDPDDMAN[c] -> NADP[c] + GDPFUC[c]	evm.model.scaffold00318.6	evm.model.scaffold00318.6	GDP-L-fucose synthase	1.1.1.271	Hexose sugar metabolism
r153	NAD[c] + SOT[c] -> FRU[c] + NADH[c]	evm.model.scaffold00253.11; evm.model.scaffold00296.11; evm.model.scaffold00784.1	evm.model.scaffold00253.11; evm.model.scaffold00296.11; evm.model.scaffold00784.1	Sorbitol dehydrogenase	1.1.1.14	Hexose sugar metabolism
r154	NAD[m] + SOT[m] -> FRU[m] + NADH[m]	evm.model.scaffold00253.11	evm.model.scaffold00253.11	Sorbitol dehydrogenase	1.1.1.14	Hexose sugar metabolism
r155	ATP[c] + MAN[c] -> ADP[c] + MAN6P[c]	evm.model.scaffold00016.60;evm.model.scaffold00086.19;evm.model.scaffold00280.7;evm.model.scaffold00179.8;evm.model.scaffold00235.9;evm.model.scaffold00311.2;evm.model.scaffold00052.18;evm.model.scaffold00201.16;evm.model.scaffold00227.14;evm.model.scaffold00018.58	evm.model.scaffold00016.60;evm.model.scaffold00086.19;evm.model.scaffold00280.7;evm.model.scaffold00179.8;evm.model.scaffold00235.9;evm.model.scaffold00311.2;evm.model.scaffold00052.18;evm.model.scaffold00201.16;evm.model.scaffold00227.14;evm.model.scaffold00018.58	Hexokinase	2.7.1.1	Hexose sugar metabolism
r156	ATP[b] + MAN[b] -> ADP[b] + MAN6P[b]	evm.model.scaffold00021.35;evm.model.scaffold00086.19	evm.model.scaffold00021.35;evm.model.scaffold00086.19	Hexokinase	2.7.1.1	Hexose sugar metabolism
r157	GLC[e] + FRU[e] -> GLCLACNE[e] + GLCOL[e]	evm.model.scaffold00101.7	evm.model.scaffold00101.7	Glucose-fructose oxidoreductase	1.1.99.28	Hexose sugar metabolism
r158	GLC[c] + FRU[c] -> GLCLACNE[c] + GLCOL[c]	evm.model.scaffold00101.7	evm.model.scaffold00101.7	Glucose-fructose oxidoreductase	1.1.99.28	Hexose sugar metabolism
r159	14MNAN[c] -> MAN[c]	evm.model.scaffold00029.32	evm.model.scaffold00029.32	mannan endo-1,4-beta-mannosidase	3.2.1.78	Hexose sugar metabolism
r160	MELI[c] + H2O[c] -> GLC[c] + GLAC[c]	evm.model.scaffold00295.6; evm.model.scaffold00099.9; evm.model.scaffold00221.19	evm.model.scaffold00295.6; evm.model.scaffold00099.9; evm.model.scaffold00221.19	Alpha-galactosidase	3.2.1.22	Disaccharide metabolism
r161	STAOSE[c] + H2O[c] -> GLAC[c] + MELI[c]	evm.model.scaffold00295.6; evm.model.scaffold00099.9; evm.model.scaffold00221.19	evm.model.scaffold00295.6; evm.model.scaffold00099.9; evm.model.scaffold00221.19	Alpha-galactosidase	3.2.1.22	Disaccharide metabolism
r162	GLACMYOI[e] + RAF[e] -> MYOI[e] + STAOSE[e]	evm.model.scaffold00128.19	evm.model.scaffold00128.19	Stachyose synthetase	2.4.1.67	Disaccharide metabolism
r163	G6P[c] + UDPG[c] -> UDP[c] + TRE6P[c]	evm.model.scaffold00095.24;evm.model.scaffold00106.13;evm.model.scaffold00001.20;evm.model.scaffold00200.11;evm.model.scaffold00318.10;evm.model.scaffold00162.7; evm.model.scaffold00031.39	evm.model.scaffold00095.24;evm.model.scaffold00106.13;evm.model.scaffold00001.20;evm.model.scaffold00200.11;evm.model.scaffold00318.10;evm.model.scaffold00162.7; evm.model.scaffold00031.39	Alpha, alpha -trehalose-phosphate synthase (UDP-forming)	2.4.1.15	Disaccharide metabolism
r164	H2O[c] + TRE[c] -> 2 DGLC[c]	evm.model.scaffold00301.4;evm.model.scaffold00218.19;evm.model.scaffold00019.58;evm.model.scaffold00040.43	evm.model.scaffold00301.4;evm.model.scaffold00218.19;evm.model.scaffold00019.58;evm.model.scaffold00040.43	Trehalase	3.2.1.28	Disaccharide metabolism
r165	H2O[e] + TRE[e] -> 2 DGLC[e]	evm.model.scaffold00077.10	evm.model.scaffold00077.10	Trehalase	3.2.1.28	Disaccharide metabolism
r166	H2O[c] + MLT[c] -> 2 GLC[c]	evm.model.scaffold00101.15; evm.model.scaffold00062.36	evm.model.scaffold00101.15; evm.model.scaffold00062.36	Alpha-glucosidase	3.2.1.20	Disaccharide metabolism
r167	H2O[e] + MLT[e] -> 2 GLC[e]	evm.model.scaffold00317.8	evm.model.scaffold00317.8	Alpha-glucosidase	3.2.1.20	Disaccharide metabolism
r168	H2O[c] + SUC[c] -> GLC[c] + FRU[c]	evm.model.scaffold00101.15; evm.model.scaffold00062.36	evm.model.scaffold00101.15; evm.model.scaffold00062.36	Alpha-glucosidase	3.2.1.20	Disaccharide metabolism
r169	H2O[e] + SUC[e] -> GLC[e] + FRU[e]	evm.model.scaffold00317.8	evm.model.scaffold00317.8	Alpha-glucosidase	3.2.1.20	Disaccharide metabolism
r170	H2O[p] + SUC[p] -> GLC[p] + FRU[p]	evm.model.scaffold00635.1;evm.model.scaffold00101.12	evm.model.scaffold00635.1;evm.model.scaffold00101.12	Alpha-glucosidase	3.2.1.20	Disaccharide metabolism
r171	H2O[c] + LACT[c] -> GLC[c] + GLAC[c]	evm.model.scaffold00020.58	evm.model.scaffold00020.58	Beta-galactosidase	3.2.1.23	Disaccharide metabolism
r172	H2O[b] + LACT[b] -> GLC[b] + GLAC[b]	evm.model.scaffold00020.58	evm.model.scaffold00020.58	Beta-galactosidase	3.2.1.23	Disaccharide metabolism
r173	TRE6P[c] + H2O[c] -> TRE[c] + PI[c]	evm.model.scaffold00200.11	evm.model.scaffold00200.11	Trehalose-phosphatase	3.1.3.12	Disaccharide metabolism
r174	NAGA6P[c] <=> NAGA1P[c]	evm.model.scaffold00057.33	evm.model.scaffold00057.33	Phosphoacetylglucosamine mutase	5.4.2.3	Polysaccharide metabolism
r175	UTP[c] + NAGA1P[c] <=> PPI[c] + UDPNAG[c]	evm.model.scaffold00076.14	evm.model.scaffold00076.14	UDP-N-acetylglucosamine pyrophosphorylase	2.7.7.23	Polysaccharide metabolism
r176	UDPG[c] -> UDP[c] + 13GLUCAN[c]	evm.model.scaffold00250.12; evm.model.scaffold00085.4	evm.model.scaffold00250.12; evm.model.scaffold00085.4	1,3-beta-glucan synthase	2.4.1.34	Polysaccharide metabolism
r177	UDPG[b] -> UDP[b] + 13GLUCAN[b]	evm.model.scaffold00250.12; evm.model.scaffold00085.4	evm.model.scaffold00250.12; evm.model.scaffold00085.4	1,3-beta-glucan synthase	2.4.1.34	Polysaccharide metabolism
r178	CELLU[e] -> 14GLUCAN[e] + CELLOB[e]	evm.model.scaffold00048.20;evm.model.scaffold00027.6	evm.model.scaffold00048.20;evm.model.scaffold00027.6	Endoglucanase	3.2.1.4	Polysaccharide metabolism
r179	CELLU[b] -> 14GLUCAN[b] + CELLOB[b]	evm.model.scaffold00015.35;evm.model.scaffold00083.35	evm.model.scaffold00015.35;evm.model.scaffold00083.35	Endoglucanase	3.2.1.4	Polysaccharide metabolism
r180	CELLU[e] -> 13GLUCAN[e]	evm.model.scaffold00001.122	evm.model.scaffold00001.122	Endoglucanase	3.2.1.4	Polysaccharide metabolism
r181	CELLOB[c] -> bDGLC[c]	evm.model.scaffold00059.36; evm.model.scaffold00113.13;evm.model.scaffold00005.1;evm.model.scaffold00101.15;evm.model.scaffold00100.23	evm.model.scaffold00059.36; evm.model.scaffold00113.13;evm.model.scaffold00005.1;evm.model.scaffold00101.15;evm.model.scaffold00100.23	Beta-glucosidase	3.2.1.21	Polysaccharide metabolism
r182	14GLUCAN[c] -> bDGLC[c]	evm.model.scaffold00059.36; evm.model.scaffold00113.13;evm.model.scaffold00005.1;evm.model.scaffold00101.15;evm.model.scaffold00100.23	evm.model.scaffold00059.36; evm.model.scaffold00113.13;evm.model.scaffold00005.1;evm.model.scaffold00101.15;evm.model.scaffold00100.23	Beta-glucosidase	3.2.1.21	Polysaccharide metabolism
r183	GDPMAN[c] -> MANNAN[c]	evm.model.scaffold00223.19	evm.model.scaffold00223.19	UDP-glucose glycoprotein glucosyltransferase	2.4.1.-	Polysaccharide metabolism
r184	MANNAN[c] -> MAN[c]	evm.model.scaffold00054.54;evm.model.scaffold00127.32	evm.model.scaffold00054.54;evm.model.scaffold00127.32	Alpha-mannosidase	3.2.1.113; 3.2.1.24	Polysaccharide metabolism
r185	STAR[c] -> GLC[c]	evm.model.scaffold00145.1	evm.model.scaffold00145.1	Glucoamylase	3.2.1.3	Polysaccharide metabolism
r186	STAR[b] -> GLC[b]	evm.model.scaffold00165.14	evm.model.scaffold00165.14	Glucoamylase	3.2.1.3	Polysaccharide metabolism
r187	STAR[e] -> GLC[e]	evm.model.scaffold00027.2	evm.model.scaffold00027.2	Glucoamylase	3.2.1.3	Polysaccharide metabolism
r188	UDPG[c] -> UDP[c] + GLYNIN[c]	evm.model.scaffold00245.15;evm.model.scaffold00387.2	evm.model.scaffold00245.15;evm.model.scaffold00387.2	Starch synthase	2.4.1.11	Polysaccharide metabolism
r189	ATP[c] + G1P[c] -> ADPGLC[c] + PPI[c]	Gap	Gap	Glucose-1-phosphate adenylyltransferase	2.7.7.27	Polysaccharide metabolism
r190	ADPGLC[m] -> ADP[m] + GLYNIN[m]	evm.model.scaffold00134.9	evm.model.scaffold00134.9	Starch synthase	2.4.1.21	Polysaccharide metabolism
r191	ADPGLC[p] -> ADP[p] + GLYNIN[p]	evm.model.scaffold00134.9	evm.model.scaffold00134.9	Starch synthase	2.4.1.21	Polysaccharide metabolism
r192	GLYNIN[c] -> STAR[c]	evm.model.scaffold00096.18	evm.model.scaffold00096.18	1,4-alpha-glucan branching enzyme	2.4.1.18	Polysaccharide metabolism
r193	STAR[c] + PI[c] -> G1P[c] + GLYCODEX[c]	Gap	Gap	Starch phosphorylase	2.4.1.1	Polysaccharide metabolism
r194	STAR[e] + PI[e] -> G1P[e] + GLYCODEX[e]	Gap	Gap	Starch phosphorylase	2.4.1.1	Polysaccharide metabolism
r195	GLYCODEX[c] -> bDGLC[c]	evm.model.scaffold00165.4	evm.model.scaffold00165.4	4-alpha-glucanotransferase	2.4.1.25	Polysaccharide metabolism
r196	PI[c] + MLTOSE[c] -> G1P[c] + MLTIOSE[c]	Gap	Gap	Starch phosphorylase	2.4.1.1	Polysaccharide metabolism
r197	H2O[e] + MLTIOSE[e] -> GLC[e] + MLT[e]	evm.model.scaffold00317.8	evm.model.scaffold00317.8	Alpha-glucosidase	3.2.1.20	Polysaccharide metabolism
r198	H2O[c] + MLTIOSE[c] -> GLC[c] + MLT[c]	evm.model.scaffold00101.15; evm.model.scaffold00062.36	evm.model.scaffold00101.15; evm.model.scaffold00062.36	Alpha-glucosidase	3.2.1.20	Polysaccharide metabolism
r199	H2O[c] + CHIB[c] -> NAG[c]	evm.model.scaffold00054.48;evm.model.scaffold00054.37;evm.model.scaffold00013.65	evm.model.scaffold00054.48;evm.model.scaffold00054.37;evm.model.scaffold00013.65	Beta-N-acetylglucosaminidase	3.2.1.52	Polysaccharide metabolism
r200	H2O[e] + CHIB[e] -> NAG[e]	evm.model.scaffold00038.37;evm.model.scaffold00054.48	evm.model.scaffold00038.37;evm.model.scaffold00054.48	Beta-N-acetylglucosaminidase	3.2.1.52	Polysaccharide metabolism
r201	H2O[c] + CHIT[c] -> CHIB[c]	evm.model.scaffold00128.29	evm.model.scaffold00128.29	Chitinase	3.2.1.14	Polysaccharide metabolism
r202	H2O[b] + CHIT[b] -> CHIB[b]	evm.model.scaffold00100.8	evm.model.scaffold00100.8	Chitinase	3.2.1.14	Polysaccharide metabolism
r203	H2O[e] + CHIT[e] -> CHIB[e]	evm.model.scaffold00064.13_evm.model.scaffold00064.14;evm.model.scaffold00100.9;evm.model.scaffold00004.80;evm.model.scaffold00022.24;evm.model.scaffold00321.3;evm.model.scaffold00337.1; evm.model.scaffold00097.15;evm.model.scaffold00004.19;evm.model.scaffold00250.10;evm.model.scaffold00085.11;evm.model.scaffold00038.39;evm.model.scaffold00372.1;evm.model.scaffold00180.13	evm.model.scaffold00064.13_evm.model.scaffold00064.14;evm.model.scaffold00100.9;evm.model.scaffold00004.80;evm.model.scaffold00022.24;evm.model.scaffold00321.3;evm.model.scaffold00337.1; evm.model.scaffold00097.15;evm.model.scaffold00004.19;evm.model.scaffold00250.10;evm.model.scaffold00085.11;evm.model.scaffold00038.39;evm.model.scaffold00372.1;evm.model.scaffold00180.13	Chitinase	3.2.1.14	Polysaccharide metabolism
r204	H2O[c] + CHIT[c] -> NAG[c]	evm.model.scaffold00128.29	evm.model.scaffold00128.29	Chitinase	3.2.1.14	Polysaccharide metabolism
r205	H2O[b] + CHIT[b] -> NAG[b]	evm.model.scaffold00100.8	evm.model.scaffold00100.8	Chitinase	3.2.1.14	Polysaccharide metabolism
r206	H2O[e] + CHIT[e] -> NAG[e]	evm.model.scaffold00064.13_evm.model.scaffold00064.14;evm.model.scaffold00100.9;evm.model.scaffold00004.80;evm.model.scaffold00022.24;evm.model.scaffold00321.3;evm.model.scaffold00337.1; evm.model.scaffold00097.15;evm.model.scaffold00004.19;evm.model.scaffold00250.10;evm.model.scaffold00085.11;evm.model.scaffold00038.39;evm.model.scaffold00372.1;evm.model.scaffold00180.13	evm.model.scaffold00064.13_evm.model.scaffold00064.14;evm.model.scaffold00100.9;evm.model.scaffold00004.80;evm.model.scaffold00022.24;evm.model.scaffold00321.3;evm.model.scaffold00337.1; evm.model.scaffold00097.15;evm.model.scaffold00004.19;evm.model.scaffold00250.10;evm.model.scaffold00085.11;evm.model.scaffold00038.39;evm.model.scaffold00372.1;evm.model.scaffold00180.13	Chitinase	3.2.1.14	Polysaccharide metabolism
r207	H2O[c] + NAGA6P[c] -> AC[c] + GA6P[c]	evm.model.scaffold00084.31;evm.model.scaffold00165.1	evm.model.scaffold00084.31;evm.model.scaffold00165.1	N-acetylglucosamine-6-phosphate deacetylase	3.5.1.25	Polysaccharide metabolism
r208	H2O[c] + GA6P[c] -> F6P[c] + NH3[c]	evm.model.scaffold00312.2;evm.model.scaffold00006.62;evm.model.scaffold00024.6;evm.model.scaffold00153.3;evm.model.scaffold00280.6	evm.model.scaffold00312.2;evm.model.scaffold00006.62;evm.model.scaffold00024.6;evm.model.scaffold00153.3;evm.model.scaffold00280.6	Glucosamine-6-phosphate deaminase	3.5.99.6	Polysaccharide metabolism
r209	ATP[c] + GLCN[c] -> ADP[c] + GA6P[c]	evm.model.scaffold00016.60;evm.model.scaffold00086.19;evm.model.scaffold00280.7;evm.model.scaffold00179.8;evm.model.scaffold00235.9;evm.model.scaffold00311.2;evm.model.scaffold00052.18;evm.model.scaffold00201.16;evm.model.scaffold00227.14;evm.model.scaffold00018.58	evm.model.scaffold00016.60;evm.model.scaffold00086.19;evm.model.scaffold00280.7;evm.model.scaffold00179.8;evm.model.scaffold00235.9;evm.model.scaffold00311.2;evm.model.scaffold00052.18;evm.model.scaffold00201.16;evm.model.scaffold00227.14;evm.model.scaffold00018.58	Hexokinase	2.7.1.1	Polysaccharide metabolism
r210	ATP[b] + GLCN[b] -> ADP[b] + GA6P[b]	evm.model.scaffold00021.35;evm.model.scaffold00086.19	evm.model.scaffold00021.35;evm.model.scaffold00086.19	Hexokinase	2.7.1.1	Polysaccharide metabolism
r211	UDPNAG[c] -> UDP[c] + CHIT[c]	evm.model.scaffold00189.6	evm.model.scaffold00189.6	Chitin synthase	2.4.1.16	Polysaccharide metabolism
r212	UDPNAG[b] -> UDP[b] + CHIT[b]	evm.model.scaffold00015.54;evm.model.scaffold00230.15;evm.model.scaffold00020.49;evm.model.scaffold00063.7;evm.model.scaffold00004.88;evm.model.scaffold00019.13;evm.model.scaffold00020.49;evm.model.scaffold00035.37;evm.model.scaffold00041.15;evm.model.scaffold00083.41;evm.model.scaffold00119.7;evm.model.scaffold00170.18;evm.model.scaffold00175.21_evm.model.scaffold00175.22_evm.model.scaffold00175…	evm.model.scaffold00015.54;evm.model.scaffold00230.15;evm.model.scaffold00020.49;evm.model.scaffold00063.7;evm.model.scaffold00004.88;evm.model.scaffold00019.13;evm.model.scaffold00020.49;evm.model.scaffold00035.37;evm.model.scaffold00041.15;evm.model.scaffold00083.41;evm.model.scaffold00119.7;evm.model.scaffold00170.18;evm.model.scaffold00175.21_evm.model.scaffold00175.22_evm.model.scaffold00175…	Chitin synthase	2.4.1.16	Polysaccharide metabolism
r213	UDPNAG[e] -> UDP[e] + CHIT[e]	evm.model.scaffold00018.53;evm.model.scaffold00100.27	evm.model.scaffold00018.53;evm.model.scaffold00100.27	Chitin synthase	2.4.1.16	Polysaccharide metabolism
r214	UDPNAG[m] -> UDP[m] + CHIT[m]	evm.model.scaffold00189.8	evm.model.scaffold00189.8	Chitin synthase	2.4.1.16	Polysaccharide metabolism
r215	H2O[c] + CHIT[c] -> AC[c] + CHITO[c]	evm.model.scaffold00170.19	evm.model.scaffold00170.19	Chitin deacetylase	3.5.1.41	Polysaccharide metabolism
r216	H2O[e] + CHIT[e] -> AC[e] + CHITO[e]	evm.model.scaffold00051.25,evm.model.scaffold00002.70,evm.model.scaffold00049.45,evm.model.scaffold00049.46,evm.model.scaffold00065.5,evm.model.scaffold00252.12,evm.model.scaffold00105.5,evm.model.scaffold00014.43,evm.model.scaffold00045.49,evm.model.scaffold00127.34,evm.model.scaffold00024.16,evm.model.scaffold00095.31,evm.model.scaffold00010.65,evm.model.scaffold00051.25,evm.model.scaffold00230…	evm.model.scaffold00051.25,evm.model.scaffold00002.70,evm.model.scaffold00049.45,evm.model.scaffold00049.46,evm.model.scaffold00065.5,evm.model.scaffold00252.12,evm.model.scaffold00105.5,evm.model.scaffold00014.43,evm.model.scaffold00045.49,evm.model.scaffold00127.34,evm.model.scaffold00024.16,evm.model.scaffold00095.31,evm.model.scaffold00010.65,evm.model.scaffold00051.25,evm.model.scaffold00230…	Chitin deacetylase	3.5.1.41	Polysaccharide metabolism
r217	CHITO[e] -> GLCMNIDE[e]	evm.model.scaffold00205.14	evm.model.scaffold00205.14	Chitosanase	3.2.1.132	Polysaccharide metabolism
r218	13GLUCAN[c] -> DGLC[c]	evm.model.scaffold00103.8	evm.model.scaffold00103.8	Glucan endo-1,3-beta-D-glucosidase	3.2.1.39	Polysaccharide metabolism
r219	13GLUCAN[e] -> GLC[e]	evm.model.scaffold00266.7;evm.model.scaffold00286.4; evm.model.scaffold00085.31	evm.model.scaffold00266.7;evm.model.scaffold00286.4; evm.model.scaffold00085.31	Exo-beta-1,3-glucanase	3.2.1.58	Polysaccharide metabolism
r220	ACCOA[c] + GA1P[c] -> COA[c] + NAGA1P[c]	evm.model.scaffold00072.3	evm.model.scaffold00072.3	Glucosamine-1-phosphate N-acetyltransferase	2.3.1.157	Polysaccharide metabolism
r221	MANNAN[c] -> MAN[c]	evm.model.scaffold00014.60;evm.model.scaffold00071.8;evm.model.scaffold00127.32;evm.model.scaffold00054.54	evm.model.scaffold00014.60;evm.model.scaffold00071.8;evm.model.scaffold00127.32;evm.model.scaffold00054.54	mannosyl-oligosaccharide 1,2-alpha-mannosidase	3.2.1.113	Polysaccharide metabolism
r222	MANNAN[b] -> MAN[b]	evm.model.scaffold00021.58;evm.model.scaffold00032.58	evm.model.scaffold00021.58;evm.model.scaffold00032.58	mannosyl-oligosaccharide 1,2-alpha-mannosidase	3.2.1.113	Polysaccharide metabolism
r223	4 ASCOBATE[c] + O2[c] -> 2 H2O[c] + 4 MASCORBATE[c]	evm.model.scaffold00024.59	evm.model.scaffold00024.59	L-ascorbate oxidase	1.10.3.3	Ascorbate and aldarate metabolism
r224	4 ASCOBATE[m] + O2[m] -> 2 H2O[m] + 4 MASCORBATE[m]	evm.model.scaffold00024.59	evm.model.scaffold00024.59	L-ascorbate oxidase	1.10.3.3	Ascorbate and aldarate metabolism
r225	4 ASCOBATE[e] + O2[e] -> 2 H2O[e] + 4 MASCORBATE[e]	evm.model.scaffold00005.9	evm.model.scaffold00005.9	L-ascorbate oxidase	1.10.3.3	Ascorbate and aldarate metabolism
r226	O2[m] + GULACNE[m] -> XYLACNE[m] + H2O2[m]	evm.model.scaffold00110.24	evm.model.scaffold00110.24	L-gulonolactone oxidase	1.1.3.8	Ascorbate and aldarate metabolism
r227	XYLACNE[m] -> ASCOBATE[m]	evm.model.scaffold00110.24	evm.model.scaffold00110.24	L-gulonolactone oxidase	1.1.3.8	Ascorbate and aldarate metabolism
r228	2 RGT[c] + MASCORBATE[c] <=> RGTDS[c] + ASCOBATE[c]	evm.model.scaffold00643.1;evm.model.scaffold00019.57	evm.model.scaffold00643.1;evm.model.scaffold00019.57	Glutathione dehydrogenase (ascorbate)	1.8.5.1	Ascorbate and aldarate metabolism
r229	CDPDG[b] + MYOI[b] -> CMP[b] + PINS[b]	evm.model.scaffold00024.48	evm.model.scaffold00024.48	Phosphatidylinositol synthase	2.7.8.11	Inositol phosphate metabolism
r230	G6P[c] -> MI1P[c]	evm.model.scaffold00142.27	evm.model.scaffold00142.27	Myo-inositol-1-phosphate synthase	5.5.1.4	Inositol phosphate metabolism
r231	MI1P[c] -> PI[c] + MYOI[c]	evm.model.scaffold00097.27	evm.model.scaffold00097.27	Myo-inositol 1-phosphatase	3.1.3.25	Inositol phosphate metabolism
r232	NAD[c] + MYOI[c] -> NADH[c] + KEMYOI[c]	evm.model.scaffold00088.23	evm.model.scaffold00088.23	Myo-inositol 2-dehydrogenase	1.1.1.18	Inositol phosphate metabolism
r233	ATP[c] + PINS[c] -> ADP[c] + PINSP[c]	evm.model.scaffold00048.48	evm.model.scaffold00048.48	Phosphatidylinositol 3-kinase	2.7.1.137	Inositol phosphate metabolism
r234	ATP[c] + PINS[c] -> ADP[c] + PINS4P[c]	evm.model.scaffold00087.21;evm.model.scaffold00020.13	evm.model.scaffold00087.21;evm.model.scaffold00020.13	Phosphatidylinositol 4-kinase	2.7.1.67	Inositol phosphate metabolism
r235	ATP[b] + PINS[b] -> ADP[b] + PINS4P[b]	evm.model.scaffold00034.60;evm.model.scaffold00020.13;evm.model.scaffold00039.60	evm.model.scaffold00034.60;evm.model.scaffold00020.13;evm.model.scaffold00039.60	Phosphatidylinositol 4-kinase	2.7.1.67	Inositol phosphate metabolism
r236	ATP[c] + PINS4P[c] -> ADP[c] + D45PI[c]	evm.model.scaffold00013.66;evm.model.scaffold00073.20	evm.model.scaffold00013.66;evm.model.scaffold00073.20	phosphatidylinositol-4-phosphate 5-kinase	2.7.1.68	Inositol phosphate metabolism
r237	ATP[m] + PINS4P[m] -> ADP[m] + D45PI[m]	evm.model.scaffold00013.66;evm.model.scaffold00073.20	evm.model.scaffold00013.66;evm.model.scaffold00073.20	phosphatidylinositol-4-phosphate 5-kinase	2.7.1.68	Inositol phosphate metabolism
r238	H2O[b] + TPI[b] -> MYOBISPI[b] + PI[b]	evm.model.scaffold00042.9; evm.model.scaffold00042.10	evm.model.scaffold00042.9; evm.model.scaffold00042.10	inositol-1,4,5-trisphosphate 5-phosphatase	3.1.3.56	Inositol phosphate metabolism
r239	H2O[b] + D45PI[b] -> PINS4P[b] + PI[b]	evm.model.scaffold00042.9; evm.model.scaffold00042.10	evm.model.scaffold00042.9; evm.model.scaffold00042.10	Phosphatidylinositol-bisphosphatase	3.1.3.36	Inositol phosphate metabolism
r240	H2O[c] + D45PI[c] -> PINS4P[c] + PI[c]	evm.model.scaffold00300.4;evm.model.scaffold00165.5;evm.model.scaffold00535.2; evm.model.scaffold00130.23	evm.model.scaffold00300.4;evm.model.scaffold00165.5;evm.model.scaffold00535.2; evm.model.scaffold00130.23	Phosphatidylinositol-bisphosphatase	3.1.3.36	Inositol phosphate metabolism
r241	MYOI[e] + O2[e] -> H2O[e] + GLUCN[e]	evm.model.scaffold00084.26	evm.model.scaffold00084.26	Inositol oxygenase	1.13.99.1	Inositol phosphate metabolism
r242	UDPNAG[b] + DOLP[b] -> UMP[b] + NAGDPD[b]	evm.model.scaffold00121.23	evm.model.scaffold00121.23	UDP-N-acetylglucosamine-dolichyl-phosphate N-acetylglucosaminephosphotransferase	2.7.8.15	N-Glycan biosynthesis
r243	NAGDPD[c] + UDPNAG[c] -> UDP[c] + CHIBDPD[c]	Gap	Gap	N-acetylglucosaminyldiphosphodolichol N-acetylglucosaminyltransferase	2.4.1.141	N-Glycan biosynthesis
r244	GDPMAN[c] + CHIBDPD[c] -> GDP[c] + MANCHIBDPD[c]	evm.model.scaffold00293.4	evm.model.scaffold00293.4	Chitobiosyldiphosphodolichol beta-mannosyltransferase	2.4.1.142	N-Glycan biosynthesis
r245	GDPMAN[c] + MANCHIBDPD[c] -> GDP[c] + MANDPP[c]	evm.model.scaffold00062.42	evm.model.scaffold00062.42	GDP-Man:Man1GlcNAc2-PP-dolichol alpha-1,3-mannosyltransferase	2.4.1.132	N-Glycan biosynthesis
r246	GDPMAN[c] + MANDPP[c] -> GDP[c] + MANDPPD[c]	evm.model.scaffold00062.42	evm.model.scaffold00062.42	GDP-Man:Man2GlcNAc2-PP-dolichol alpha-1,6-mannosyltransferase	2.4.1.257	N-Glycan biosynthesis
r247	2 GDPMAN[b] + MANDPPD[b] -> 2 GDP[b] + MANNACD[b]	evm.model.scaffold00277.8	evm.model.scaffold00277.8	GDP-Man:Man3GlcNAc2-PP-dolichol alpha-1,2-mannosyltransferase	2.4.1.131	N-Glycan biosynthesis
r248	GDPMAN[c] + DOLP[c] -> DOLMANP[c] + GDP[c]	evm.model.scaffold00203.26	evm.model.scaffold00203.26	GDPmanse:dolichyl-phosphate O-beta-D-mannosyltransferase	2.4.1.83	N-Glycan biosynthesis
r249	DOLMANP[b] + MANNACD[b] -> MANNACDD[b] + DOLP[b]	evm.model.scaffold00496.1	evm.model.scaffold00496.1	Dolichyl-P-Man:Man5GlcNAc2-PP-dolichol alpha-1,3-mannosyltransferase	2.4.1.258	N-Glycan biosynthesis
r250	DOLGPI[b] + MANNACDDD[b] -> GLCAADPP[b] + DOLP[b]	Gap	Gap	Dolichyl-P-Glc:Man9GlcNAc2-PP-dolichol alpha-1,3-glucosyltransferase	2.4.1.267	N-Glycan biosynthesis
r251	DOLGPI[b] + GLCAADPP[b] -> GLCADP[b] + DOLP[b]	evm.model.scaffold00041.42	evm.model.scaffold00041.42	Dolichyl-P-Glc:Glc1Man9GlcNAc2-PP-dolichol alpha-1,3-glucosyltransferase	2.4.1.265	N-Glycan biosynthesis
r252	DOLGPI[b] + GLCADP[b] -> GLCADPP[b] + DOLP[b]	Gap	Gap	Dolichyl-P-Glc:Glc2Man9GlcNAc2-PP-dolichol alpha-1,2-glucosyltransferase	2.4.1.256	N-Glycan biosynthesis
r253	DOLDLS[b] + PROTASN[b] <=> DOLP[b] + GLCPASN[b]	Gap	Gap	Dolichyl-diphosphooligosaccharide-protein glycotransferase	2.4.99.18	N-Glycan biosynthesis
r254	DOLP[b] + UDPG[b] -> UDP[b] + DOLGPI[b]	evm.model.scaffold00184.5	evm.model.scaffold00184.5	Dolichyl-phosphate beta-glucosyltransferase	2.4.1.117	N-Glycan biosynthesis
r255	DOLDP[c] + H2O[c] -> DOLP[c] + PI[c]	evm.model.scaffold00107.21	evm.model.scaffold00107.21	Dolichyl diphosphatase	3.6.1.43	N-Glycan biosynthesis
r256	UDPNAG[b] + PINS[b] -> UDP[b] + NAGPMIL[b]	evm.model.scaffold00226.8	evm.model.scaffold00226.8	Phosphatidylinositol N-acetylglucosaminyltransferase	2.4.1.198	Glycosylphosphatidylinositol (GPI)-anchor biosynthesis
r257	PPI[c] -> 2 PI[c]	evm.model.scaffold00001.70; evm.model.scaffold00383.5	evm.model.scaffold00001.70; evm.model.scaffold00383.5	Inorganic pyrophosphatase	3.6.1.1	Oxidative phosphorylation
r258	ATP[c] + H2O[c] -> ADP[c] + PI[c]	evm.model.scaffold00166.16	evm.model.scaffold00166.16	Adenosinetriphosphatase	3.6.4.1; 3.6.1.3	Oxidative phosphorylation
r259	H2O[m] + ATP[m] -> PI[m] + ADP[m]	evm.model.scaffold00265.16	evm.model.scaffold00265.16	Adenosinetriphosphatase	3.6.4.1; 3.6.1.3	Oxidative phosphorylation
r260	NADH[m] + Q[m] + 4 H_PO[m] -> NAD[m] + QH2[m] + 4 H_PO[c]	evm.model.scaffold00108.12; evm.model.scaffold00108.11	evm.model.scaffold00108.12; evm.model.scaffold00108.11	NADH-ubiquinone oxidoreductase (respiratory chain), Complex	1.6.5.3	Oxidative phosphorylation
r261	NADH[m] + Q[m] + 4 H_PO[m] -> NAD[m] + QH2[m] + 4 H_PO[m]	evm.model.scaffold00101.11;evm.model.scaffold00285.4;evm.model.scaffold00006.68;evm.model.scaffold00085.30;evm.model.scaffold00019.35	evm.model.scaffold00101.11;evm.model.scaffold00285.4;evm.model.scaffold00006.68;evm.model.scaffold00085.30;evm.model.scaffold00019.35	NADH-ubiquinone oxidoreductase (respiratory chain), Complex	1.6.5.3	Oxidative phosphorylation	Updated reaction
r262	NADH[c]+ Q[c] + 4 H_PO[c] -> NAD[c]+ QH2[c] + 4 H_PO[c]	evm.model.scaffold00019.35	evm.model.scaffold00019.35	NADH-ubiquinone oxidoreductase (respiratory chain), Complex	1.6.5.3	Oxidative phosphorylation	Updated reaction
r263	NADH[m] + FAD[m] -> NAD[m] + FADH2[m]	evm.model.scaffold00185.12	evm.model.scaffold00185.12	NADH dehydrogenase	1.6.99.3	Oxidative phosphorylation
r264	NADH[c] + FAD[c] -> NAD[c] + FADH2[c]	evm.model.scaffold00285.4;evm.model.scaffold00006.68;evm.model.scaffold00085.30;evm.model.scaffold00019.35;evm.model.scaffold00185.12;evm.model.scaffold00101.11	evm.model.scaffold00285.4;evm.model.scaffold00006.68;evm.model.scaffold00085.30;evm.model.scaffold00019.35;evm.model.scaffold00185.12;evm.model.scaffold00101.11	NADH dehydrogenase	1.6.99.3	Oxidative phosphorylation
r265	ATP[c] + H2O[c] + 3.87 H_PO[c] -> ADP[c] + PI[c] + 3.87 H_PO[e]	evm.model.scaffold00108.12	evm.model.scaffold00108.12	H+transporting ATPase	3.6.3.6	Oxidative phosphorylation
r266	ATP[m] + H2O[m] + 3.87 H_PO[m] -> ADP[m] + PI[m] + 3.87 H_PO[c]	evm.model.scaffold00254.5; evm.model.scaffold00206.5	evm.model.scaffold00254.5; evm.model.scaffold00206.5	H+transporting ATPase	3.6.3.6	Oxidative phosphorylation
r267	ATP[b] + H2O[b] + 3.87 H_PO[b] -> ADP[b] + PI[b] + 3.87 H_PO[b]	evm.model.scaffold00315.5;evm.model.scaffold00017.14;evm.model.scaffold00036.34;evm.model.scaffold00065.1;evm.model.scaffold00015.53	evm.model.scaffold00315.5;evm.model.scaffold00017.14;evm.model.scaffold00036.34;evm.model.scaffold00065.1;evm.model.scaffold00015.53	H+transporting ATPase	3.6.3.6	Oxidative phosphorylation	Updated reaction
r268	QH2[m] + 2 FERI[m] + 4 H_PO[m] -> Q[m] + 2 FERO[m] + 4 H_PO[c]	evm.model.scaffold00275.10	evm.model.scaffold00275.10	Ubiquinol-cytochrome c reductase	1.10.2.2	Oxidative phosphorylation
r269	QH2[c] + 2 FERI[c] + 4 H_PO[c] -> Q[c] + 2 FERO[c] + 4 H_PO[e]	evm.model.scaffold00294.8	evm.model.scaffold00294.8	Ubiquinol-cytochrome c reductase	1.10.2.2	Oxidative phosphorylation
r270	QH2[b] + 2 FERI[b] + 4 H_PO[b] -> Q[b] + 2 FERO[b] + 4 H_PO[b]	evm.model.scaffold00811.1;evm.model.scaffold00377.1	evm.model.scaffold00811.1;evm.model.scaffold00377.1	Ubiquinol-cytochrome c reductase	1.10.2.2	Oxidative phosphorylation	Updated reaction
r271	QH2[m] + 2 FERI[m]+ 4 H_PO[m] -> Q[m] + 2 FERO[m] + 4 H_PO[m]	evm.model.scaffold00002.58;evm.model.scaffold00034.38	evm.model.scaffold00002.58;evm.model.scaffold00034.38	Ubiquinol-cytochrome c reductase	1.10.2.2	Oxidative phosphorylation	Updated reaction
r272	NADPH[c] + 2 FERI[m] -> NADP[c] + 2 FERO[m]	evm.model.scaffold00314.10	evm.model.scaffold00314.10	NADPH-cytochrome p-450 reductase	1.6.2.4	Oxidative phosphorylation
r273	NADPH[c] + 2 FERI[c] -> NADP[c] + 2 FERO[c]	evm.model.scaffold00273.10;evm.model.scaffold00069.30;evm.model.scaffold00070.40	evm.model.scaffold00273.10;evm.model.scaffold00069.30;evm.model.scaffold00070.40	NADPH-cytochrome P450 reductase	1.6.2.4	Oxidative phosphorylation
r274	NADPH[e] + 2 FERI[e] -> NADP[e] + 2 FERO[e]	evm.model.scaffold00001.91	evm.model.scaffold00001.91	NADPH-cytochrome P450 reductase	1.6.2.4	Oxidative phosphorylation
r275	Q[c] + FADH2[m] -> QH2[c] + FAD[m]	evm.model.scaffold00053.26	evm.model.scaffold00053.26	Electron-transferring-flavoprotein dehydrogenase	1.5.5.1	Oxidative phosphorylation
r276	2 FERO[m] + 0.5 O2[m] + 4 H_PO[m] -> 2 FERI[m] + H2O[m] + 4 H_PO[c]	evm.model.scaffold00081.24	evm.model.scaffold00081.24	Cytochrome c oxidase	1.9.3.1	Oxidative phosphorylation
r277	2 FERO[c] + 0.5 O2[c] + 4 H_PO[c] -> 2 FERI[c] + H2O[c] + 4 H_PO[e]	evm.model.scaffold00068.36	evm.model.scaffold00068.36	Cytochrome c oxidase	1.9.3.1	Oxidative phosphorylation
r278	2 FERO[b] + 0.5 O2[b] + 4 H_PO[b] -> 2 FERI[b] + H2O[b] + 4 H_PO[c]	evm.model.scaffold00350.3	evm.model.scaffold00350.3	Cytochrome c oxidase	1.9.3.1	Oxidative phosphorylation
r279	2 FERO[b] + 0.5 O2[b] + 4 H_PO[b] -> 2 FERI[b] + H2O[b] + 4 H_PO[b]	evm.model.scaffold00016.69;evm.model.scaffold00238.3;evm.model.scaffold00016.70	evm.model.scaffold00016.69;evm.model.scaffold00238.3;evm.model.scaffold00016.70	Cytochrome c oxidase	1.9.3.1	Oxidative phosphorylation	Updated reaction
r280	2 FERO[e] + 0.5 O2[e] + 4 H_PO[e] -> 2 FERI[e] + H2O[e] + 4 H_PO[e]	evm.model.scaffold00238.2;evm.model.scaffold00128.18	evm.model.scaffold00238.2;evm.model.scaffold00128.18	Cytochrome c oxidase	1.9.3.1	Oxidative phosphorylation	Updated reaction
r281	PAPS[c] + RTHIO[c] -> OTHIO[c] + H2SO3[c] + PAP[c]	evm.model.scaffold00050.39;evm.model.scaffold00026.11	evm.model.scaffold00050.39;evm.model.scaffold00026.11	3-phosphoadenosine-5-phosphosulfate reductase	1.8.4.8	Oxidative phosphorylation
r282	3 NADPH[c] + H2SO3[c] -> 3 H2O[c] + 3 NADP[c] + H2S[c]	evm.model.scaffold00054.22; evm.model.scaffold00226.14	evm.model.scaffold00054.22; evm.model.scaffold00226.14	Sulfite reductase (NADPH)	1.8.1.2	Oxidative phosphorylation
r283	3 NADPH[m] + H2SO3[m] -> 3 H2O[m] + 3 NADP[m] + H2S[m]	evm.model.scaffold00232.5	evm.model.scaffold00232.5	Sulfite reductase (NADPH)	1.8.1.2	Oxidative phosphorylation
r284	H2O[e] + O2[e] + H2SO3[e] -> SLF[e] + H2O2[e]	evm.model.scaffold00319.2	evm.model.scaffold00319.2	Sulfite oxidase	1.8.3.1	Oxidative phosphorylation
r285	PI[m] + ADP[m] + 3.87 H_PO[c] -> H2O[m] + ATP[m] + 3.87 H_PO[m]	evm.model.scaffold00001.95; evm.model.scaffold00017.14; evm.model.scaffold00017.13; evm.model.scaffold00315.5; evm.model.scaffold00133.29;evm.model.scaffold00003.36;evm.model.scaffold00093.4;evm.model.scaffold00010.44;evm.model.scaffold00007.78;evm.model.scaffold00021.51	evm.model.scaffold00001.95; evm.model.scaffold00017.14; evm.model.scaffold00017.13; evm.model.scaffold00315.5; evm.model.scaffold00133.29;evm.model.scaffold00003.36;evm.model.scaffold00093.4;evm.model.scaffold00010.44;evm.model.scaffold00007.78;evm.model.scaffold00021.51	ATP phosphohydrolase (H+-transporting)	3.6.3.14	Oxidative phosphorylation
r286	PI[c] + ADP[c] + 3.87 H_PO[c] -> H2O[c] + ATP[c] + 3.87 H_PO[c]	evm.model.scaffold00253.15; evm.model.scaffold00633.1; evm.model.scaffold00092.1	evm.model.scaffold00253.15; evm.model.scaffold00633.1; evm.model.scaffold00092.1	ATP phosphohydrolase (H+-transporting)	3.6.3.14	Oxidative phosphorylation	Updated reaction
r287	PI[b] + ADP[b] + 3.87 H_PO[b] -> H2O[b] + ATP[b] + 3.87 H_PO[b]	evm.model.scaffold00206.5; evm.model.scaffold00315.5; evm.model.scaffold00633.1	evm.model.scaffold00206.5; evm.model.scaffold00315.5; evm.model.scaffold00633.1	ATP phosphohydrolase (H+-transporting)	3.6.3.14	Oxidative phosphorylation	Updated reaction
r288	PI[m] + ADP[m] + 3.87 H_PO[m] -> H2O[m] + ATP[m] + 3.87 H_PO[m]	evm.model.scaffold00001.95; evm.model.scaffold00017.14; evm.model.scaffold00017.13; evm.model.scaffold00315.5; evm.model.scaffold00133.29;evm.model.scaffold00003.36;evm.model.scaffold00093.4;evm.model.scaffold00010.44;evm.model.scaffold00007.78;evm.model.scaffold00021.51	evm.model.scaffold00001.95; evm.model.scaffold00017.14; evm.model.scaffold00017.13; evm.model.scaffold00315.5; evm.model.scaffold00133.29;evm.model.scaffold00003.36;evm.model.scaffold00093.4;evm.model.scaffold00010.44;evm.model.scaffold00007.78;evm.model.scaffold00021.51	ATP phosphohydrolase (H+-transporting)	3.6.3.14	Oxidative phosphorylation	Updated reaction
r289	ATP[m] + H2O[m] + PHOSLP[m] -> ADP[m] + PI[m] + PHOSLP[c]	evm.model.scaffold00001.10;evm.model.scaffold00017.30;evm.model.scaffold00063.28;evm.model.scaffold00065.39;evm.model.scaffold00070.1;evm.model.scaffold00169.21;evm.model.scaffold00175.18;evm.model.scaffold00196.15	evm.model.scaffold00001.10;evm.model.scaffold00017.30;evm.model.scaffold00063.28;evm.model.scaffold00065.39;evm.model.scaffold00070.1;evm.model.scaffold00169.21;evm.model.scaffold00175.18;evm.model.scaffold00196.15	phospholipid-translocating ATPase	3.6.3.1	Oxidative phosphorylation
r290	ADP[c] + PI[c] + H2O[m] + ATP[m] + H_PO[c] -> ATP[c] + H2O[c] + PI[m] + ADP[m] + H_PO[m]	evm.model.scaffold00042.36	evm.model.scaffold00042.36	Mitochondrial ADP/ATP carrier proteins		Oxidative phosphorylation
r291	NADH[c] + 2 FERRIB5[c] -> NAD[c] + 2 FERROB5[c]	evm.model.scaffold00042.2;evm.model.scaffold00065.12;evm.model.scaffold00136.15;evm.model.scaffold00609.1;evm.model.scaffold00035.14;evm.model.scaffold00013.30	evm.model.scaffold00042.2;evm.model.scaffold00065.12;evm.model.scaffold00136.15;evm.model.scaffold00609.1;evm.model.scaffold00035.14;evm.model.scaffold00013.30	Cytochrome-b5 reductase	1.6.2.2	Oxidative phosphorylation
r292	ATP[m] + H2O[m] + 3.87 H_PO[m] + Ca[m] -> ADP[m] + PI[m] + 3.87 H_PO + Ca[m]	evm.model.scaffold00147.20;evm.model.scaffold00214.9;evm.model.scaffold00239.2;evm.model.scaffold00128.21;evm.model.scaffold00072.11;evm.model.scaffold00034.40;evm.model.scaffold00034.40;evm.model.scaffold00144.21;evm.model.scaffold00242.7;evm.model.scaffold00116.15;evm.model.scaffold00091.15;evm.model.scaffold00032.56;evm.model.scaffold00121.6	evm.model.scaffold00147.20;evm.model.scaffold00214.9;evm.model.scaffold00239.2;evm.model.scaffold00128.21;evm.model.scaffold00072.11;evm.model.scaffold00034.40;evm.model.scaffold00034.40;evm.model.scaffold00144.21;evm.model.scaffold00242.7;evm.model.scaffold00116.15;evm.model.scaffold00091.15;evm.model.scaffold00032.56;evm.model.scaffold00121.6	Ca2+-transporting ATPase	3.6.3.8	Oxidative phosphorylation
r293	NADH[c] + ATP[c] -> ADP[c] + NADPH[c]	evm.model.scaffold00186.1; evm.model.scaffold00213.14	evm.model.scaffold00186.1; evm.model.scaffold00213.14	NADH kinase	2.7.1.86	Energy metabolism
r294	3 NADPH[c] + HNO2[c] -> H2O[c] + 3 NADP[c] + NH4OH[c]	evm.model.scaffold00100.35	evm.model.scaffold00100.35	Nitrite reductase (NADPH)	1.7.1.4	Nitrogen metabolism
r295	NADH[c] + HNO3[c] -> NAD[c] + H2O[c] + HNO2[c]	evm.model.scaffold00100.34	evm.model.scaffold00100.34	Nitrate reductase (NADH)	1.7.1.1	Nitrogen metabolism
r296	O2[m] + 2 NITROPRO[m] -> 2 HNO2[m] + 2 ACET[m]	evm.model.scaffold00048.47	evm.model.scaffold00048.47	2-nitropropane dioxygenase	1.13.11.32	Nitrogen metabolism
r297	H2O[c] + NH3[c] <=> NH4OH[c]			Spontaneous conversion		Nitrogen metabolism
r298	H2O[c] + CYNE[c] -> CABM[c]	Gap	Gap	Cyanate lyase	4.2.1.104	Nitrogen metabolism
r299	CABM[c] -> CO2[c] + NH3[c]			Spontaneous conversion		Nitrogen metabolism
r300	ATN[c] <=> ATT[c]	evm.model.scaffold00137.13;evm.model.scaffold00053.28	evm.model.scaffold00137.13;evm.model.scaffold00053.28	Allantoinase	3.5.2.5	Nitrogen metabolism
r301	ATT[c] <=> UGC[c] + UREA[c]	evm.model.scaffold00284.11;evm.model.scaffold00191.5; evm.model.scaffold00022.39; evm.model.scaffold00767.1	evm.model.scaffold00284.11;evm.model.scaffold00191.5; evm.model.scaffold00022.39; evm.model.scaffold00767.1	Allantoicase	3.5.3.4	Nitrogen metabolism
r302	ATT[e] <=> UGC[e] + UREA[e]	evm.model.scaffold00284.11;evm.model.scaffold00191.5; evm.model.scaffold00022.39; evm.model.scaffold00767.1	evm.model.scaffold00284.11;evm.model.scaffold00191.5; evm.model.scaffold00022.39; evm.model.scaffold00767.1	Allantoicase	3.5.3.4	Nitrogen metabolism
r303	H2O[c] + UREA[c] -> CO2[c] + 2 NH3[c]	evm.model.scaffold00089.29;evm.model.scaffold00087.17	evm.model.scaffold00089.29;evm.model.scaffold00087.17	Urease	3.5.1.5	Nitrogen metabolism
r304	NITE[c] -> NH3[c] + CARBO[c]	evm.model.scaffold00009.27	evm.model.scaffold00009.27	Nitrilase	3.5.5.1	Nitrogen metabolism
r305	CO2[c] + H2O[c] -> HCO3[c] + H_PO[c]	evm.model.scaffold00026.47;evm.model.scaffold00276.12	evm.model.scaffold00026.47;evm.model.scaffold00276.12	Carbonic anhydrase	4.2.1.1	Nitrogen metabolism
r306	OA[m] + GLU[m] <=> AKG[m] + ASP[m]	evm.model.scaffold00055.47	evm.model.scaffold00055.47	Aspartate transaminase	2.6.1.1	Alanine/aspartate and asparagine metabolism
r307	OA[c] + GLU[c] <=> AKG[c] + ASP[c]	evm.model.scaffold00132.30	evm.model.scaffold00132.30	Aspartate transaminase	2.6.1.1	Alanine/aspartate and asparagine metabolism
r308	PYR[c] + GLU[c] <=> AKG[c] + ALA[c]	evm.model.scaffold00183.7	evm.model.scaffold00183.7	Alanine aminotransferase	2.6.1.2	Alanine/aspartate and asparagine metabolism
r309	PYR[m] + GLU[m] <=> AKG[m] + ALA[m]	evm.model.scaffold00109.14	evm.model.scaffold00109.14	Alanine aminotransferase	2.6.1.2	Alanine/aspartate and asparagine metabolism
r310	H2O[c] + O2[c] + DASP[c] -> OA[c] + H2O2[c] + NH3[c]	Gap	Gap	D-aspartate oxidase	1.4.3.1	Alanine/aspartate and asparagine metabolism
r311	H2O[e] + O2[e] + DASP[e] -> H2O2[e] + OA[e] + NH3[e]	Gap	Gap	D-aspartate oxidase	1.4.3.1	Alanine/aspartate and asparagine metabolism
r312	H2O[e] + O2[e] + DASP[e] -> H2O2[e] + OA[e] + NH3[e]	evm.model.scaffold00001.109;evm.model.scaffold00059.43	evm.model.scaffold00001.109;evm.model.scaffold00059.43	D-amino-acid oxidase	1.4.3.3	Alanine/aspartate and asparagine metabolism
r313	H2O[c] + O2[c] + GLY[c] -> GLX[c] + H2O2[c] + NH3[c]	evm.model.scaffold00001.109;evm.model.scaffold00059.43	evm.model.scaffold00001.109;evm.model.scaffold00059.43	D-amino-acid oxidase	1.4.3.3	Alanine/aspartate and asparagine metabolism
r314	CYS[m] + ECYS[m] -> ALA[m] + ESULFCYS[m]	evm.model.scaffold00015.48	evm.model.scaffold00015.48	Cysteine desulfurase	2.8.1.7	Alanine/aspartate and asparagine metabolism
r315	ATP[c] + ASP[c] + GLN[c] -> AMP[c] + PPI[c] + GLU[c] + ASN[c]	evm.model.scaffold00009.35;evm.model.scaffold00111.24;evm.model.scaffold00123.8;evm.model.scaffold00260.6;evm.model.scaffold00005.12;evm.model.scaffold00017.38	evm.model.scaffold00009.35;evm.model.scaffold00111.24;evm.model.scaffold00123.8;evm.model.scaffold00260.6;evm.model.scaffold00005.12;evm.model.scaffold00017.38	Asparagine synthase (glutamine-hydrolysing)	6.3.5.4	Alanine/aspartate and asparagine metabolism
r316	NADPH[c] + BASP[c] -> PI[c] + NADP[c] + ASPSA[c]	evm.model.scaffold00008.36	evm.model.scaffold00008.36	Aspartate-semialdehyde dehydrogenase	1.2.1.11	Alanine/aspartate and asparagine metabolism
r317	ATP[c] + ASP[c] -> ADP[c] + BASP[c]	evm.model.scaffold00154.10;evm.model.scaffold00081.4	evm.model.scaffold00154.10;evm.model.scaffold00081.4	Aspartokinase	2.7.2.4	Alanine/aspartate and asparagine metabolism
r318	ATP[c] + ALA[c] + TRNA[c] -> AMP[c] + PPI[c] + LAlaTRNA[c]	evm.model.scaffold00027.61;evm.model.scaffold00109.10	evm.model.scaffold00027.61;evm.model.scaffold00109.10	Alanyl-tRNA synthetase	6.1.1.7	Alanine/aspartate and asparagine metabolism
r319	ATP[c] + ASP[c] + TRNA[c] -> AMP[c] + PPI[c] + ASPTRNA[c]	evm.model.scaffold00058.13	evm.model.scaffold00058.13	Aspartyl-tRNA synthetase	6.1.1.12	Alanine/aspartate and asparagine metabolism
r320	ATP[c] + ASN[c] + TRNA[c] -> AMP[c] + PPI[c] + ASNTRNA[c]	evm.model.scaffold00010.59	evm.model.scaffold00010.59	Asparaginyl-tRNA synthetase	6.1.1.22	Alanine/aspartate and asparagine metabolism
r321	ATP[m] + ASN[m] + TRNA[m] -> AMP[m] + PPI[m] + ASNTRNA[m]	evm.model.scaffold00153.6	evm.model.scaffold00153.6	Asparaginyl-tRNA synthetase	6.1.1.22	Alanine/aspartate and asparagine metabolism
r322	H2O[c] + OXOGLU[c] -> AKG[c] + NH3[c]	evm.model.scaffold00369.2	evm.model.scaffold00369.2	Omega-amidase	3.5.1.3	Alanine/aspartate and asparagine metabolism
r323	ASP [c]+ H2O[c] + O2[c] -> OA[c] + NH3[c] + H2O2[c]	evm.model.scaffold00057.2	evm.model.scaffold00057.2	L-amino-acid oxidase	1.4.3.2	Alanine/aspartate and asparagine metabolism	Added reaction
r324	OXPPNE[m] + COA[m] + NADP[m] -> ACCOA[m] + CO2[m] + NADPH[m]	evm.model.scaffold00033.40	evm.model.scaffold00033.40	malonate-semialdehyde dehydrogenase (acetylating)	1.2.1.18	beta-Alanine metabolism
r325	SAM[c] <=> CO2[c] + DSAM[c]	evm.model.scaffold00091.20	evm.model.scaffold00091.20	S-adenosylmethionine decarboxylase	4.1.1.50	Arginine and proline metabolism
r326	DSAM[c] + PTRSC[c] -> 5MTA[c] + SPRMD[c]	Gap	Gap	Spermidine synthase	2.5.1.16	Arginine and proline metabolism
r327	DSAM[c] + SPRMD[c] -> 5MTA[c] + SPRM[c]	Gap	Gap	Spermine synthase	2.5.1.22	Arginine and proline metabolism
r328	GLU[m] + NAGLUS[m] -> AKG[m] + NAORN[m]	evm.model.scaffold00009.28	evm.model.scaffold00009.28	Acetylornithine aminotransferase	2.6.1.11	Arginine and proline metabolism
r329	GLU[c] + NAGLUS[c] -> AKG[c] + NAORN[c]	evm.model.scaffold00188.17	evm.model.scaffold00188.17	Acetylornithine aminotransferase	2.6.1.11	Arginine and proline metabolism
r330	H2O[c] + NAORN[c] -> ORN[c] + AC[c]	Gap	Gap	Aminoacylase	3.5.1.14	Arginine and proline metabolism
r331	ORN[c] + CAP[c] -> PI[c] + CITR[c]	evm.model.scaffold00029.2	evm.model.scaffold00029.2	Ornithine carbamoyltransferase	2.1.3.3	Arginine and proline metabolism
r332	ATP[c] + ASP[c] + CITR[c] <=> AMP[c] + PPI[c] + ARGSUCC[c]	evm.model.scaffold00330.5	evm.model.scaffold00330.5	Argininosuccinate synthase	6.3.4.5	Arginine and proline metabolism
r333	ARGSUCC[c] <=> FUM[c] + ARG[c]	Gap	Gap	Argininosuccinate lyase	4.3.2.1	Arginine and proline metabolism
r334	ARG[c] -> UREA[c] + ORN[c]	evm.model.scaffold00010.42	evm.model.scaffold00010.42	Arginase	3.5.3.1	Arginine and proline metabolism
r335	H2O[c] + AGMT[c] -> UREA[c] + PTRSC[c]	evm.model.scaffold00010.42	evm.model.scaffold00010.42	Agmatinase	3.5.3.11	Arginine and proline metabolism
r336	ATP[m] + GLU[m] -> ADP[m] + GLUP[m]	evm.model.scaffold00194.19;evm.model.scaffold00261.6	evm.model.scaffold00194.19;evm.model.scaffold00261.6	Glutamate 5-kinase	2.7.2.11	Arginine and proline metabolism
r337	ATP[b] + GLU[b] -> ADP[b] + GLUP[b]	evm.model.scaffold00021.50	evm.model.scaffold00021.50	Glutamate 5-kinase	2.7.2.11	Arginine and proline metabolism
r338	NADPH[c] + GLUP[c] -> PI[c] + NADP[c] + GLUGSAL[c]	evm.model.scaffold00286.1	evm.model.scaffold00286.1	Gamma-glutamyl phosphate reductase	1.2.1.41	Arginine and proline metabolism
r339	FAD[m] + PRO[c] -> FADH2[m] + P5C[c]	evm.model.scaffold00032.9	evm.model.scaffold00032.9	Proline dehydrogenase	1.5.99.8	Arginine and proline metabolism
r340	GLUGSAL[m] <=> H2O[m] + P5C[m]	0	0	Spontaneous conversion		Arginine and proline metabolism
r341	NADP[c] + GLUGSAL[c] -> NADPH[c] + GLU[c]	evm.model.scaffold00022.60	evm.model.scaffold00022.60	Delta-1-Pyrroline-5-carboxylate dehydrogenase	1.5.1.12	Arginine and proline metabolism
r342	NADPH[c] + P5C[c] <=> NADP[c] + PRO[c]	evm.model.scaffold00008.4;evm.model.scaffold00042.14	evm.model.scaffold00008.4;evm.model.scaffold00042.14	Pyrroline-5-carboxylate reductase	1.5.1.2	Arginine and proline metabolism
r343	NAORN[c] + GLU[c] -> ORN[c] + NAGLU[c]	evm.model.scaffold00134.16	evm.model.scaffold00134.16	Glutamate N-acetyltransferase	2.3.1.35	Arginine and proline metabolism
r344	NAORN[m] + GLU[m] -> ORN[m] + NAGLU[m]	evm.model.scaffold00134.16; evm.model.scaffold00758.1	evm.model.scaffold00134.16; evm.model.scaffold00758.1	Glutamate N-acetyltransferase	2.3.1.35	Arginine and proline metabolism
r345	ACCOA[c] + GLU[c] -> COA[c] + NAGLU[c]	evm.model.scaffold00102.38; evm.model.scaffold00134.16; evm.model.scaffold00758.1	evm.model.scaffold00102.38; evm.model.scaffold00134.16; evm.model.scaffold00758.1	N-acetylglutamate synthase	2.3.1.1	Arginine and proline metabolism
r346	ACCOA[m] + GLU[m] -> COA[m] + NAGLU[m]	evm.model.scaffold00102.38; evm.model.scaffold00134.16; evm.model.scaffold00758.1	evm.model.scaffold00102.38; evm.model.scaffold00134.16; evm.model.scaffold00758.1	N-acetylglutamate synthase	2.3.1.1	Arginine and proline metabolism
r347	AKG[c] + ORN[c] -> GLU[c] + GLUGSAL[c]	evm.model.scaffold00284.7	evm.model.scaffold00284.7	Ornithine aminotransferase	2.6.1.13	Arginine and proline metabolism
r348	ORN[c] -> CO2[c] + PTRSC[c]	evm.model.scaffold00062.13	evm.model.scaffold00062.13	Ornithine decarboxylase	4.1.1.17	Arginine and proline metabolism
r349	ACCOA[c] + PTRSC[c] -> COA[c] + APRUT[c]	evm.model.scaffold00137.21;evm.model.scaffold00124.27	evm.model.scaffold00137.21;evm.model.scaffold00124.27	Diamine acetyltransferase	2.3.1.57	Arginine and proline metabolism
r350	H2O[c] + O2[c] + APRUT[c] -> H2O2[c] + NH3[c] + AABUTNOL[c]	Gap	Gap	Amine oxidase	1.4.3.4	Arginine and proline metabolism
r351	ATP[c] + TRNA[c] + ARG[c] -> AMP[c] + PPI[c] + ALTRNA[c]	evm.model.scaffold00121.8	evm.model.scaffold00121.8	Arginyl-tRNA synthetase	6.1.1.19	Arginine and proline metabolism
r352	ATP[m] + TRNA[m] + ARG[m] -> AMP[m] + PPI[m] + ALTRNA[m]	evm.model.scaffold00142.29;evm.model.scaffold00192.23	evm.model.scaffold00142.29;evm.model.scaffold00192.23	Arginyl-tRNA synthetase	6.1.1.19	Arginine and proline metabolism
r353	ATP[c] + TRNA[c] + PRO[c] -> AMP[c] + PPI[c] + LPROTRNA[c]	evm.model.scaffold00033.2	evm.model.scaffold00033.2	Prolyl-tRNA synthetase	6.1.1.15	Arginine and proline metabolism
r354	ATP[m] + TRNA[m] + PRO[m] -> AMP[m] + PPI[m] + LPROTRNA[m]	evm.model.scaffold00006.47	evm.model.scaffold00006.47	Prolyl-tRNA synthetase	6.1.1.15	Arginine and proline metabolism
r355	ORN[c] <=> NH3[c] + PRO[c]	evm.model.scaffold00089.13	evm.model.scaffold00089.13	Ornithine cyclodeaminase	4.3.1.12	Arginine and proline metabolism
r356	ORN[m] <=> NH3[m] + PRO[m]	evm.model.scaffold00089.13	evm.model.scaffold00089.13	Ornithine cyclodeaminase	4.3.1.12	Arginine and proline metabolism
r357	ATP[m] + NAGLU[m] -> ADP[m] + NAGLUP[m]	evm.model.scaffold00085.28	evm.model.scaffold00085.28	Acetylglutamate kinase	2.7.2.8	Arginine and proline metabolism
r358	NAGLUP[m] + NADP[m] + PI[m] -> NADPH[m] + ACGLU5PI[m]	evm.model.scaffold00085.28	evm.model.scaffold00085.28	N-acetyl-gamma-glutamyl-phosphate reductase	1.2.1.38	Arginine and proline metabolism
r359	AKG[m] + O2[m] + PRO[m] -> CO2[m] + SUCC[m] + HYPRO[m]	evm.model.scaffold00095.36	evm.model.scaffold00095.36	Procollagen-proline dioxygenase	1.14.11.2	Arginine and proline metabolism
r360	GLN[c] -> GLU[c] + NH3[c]	evm.model.scaffold00091.11	evm.model.scaffold00091.11	glutaminase	3.5.1.2	Arginine and proline metabolism
r361	ATP[c] + TRNA[c] + CYS[c] -> AMP[c] + PPI[c] + LCysTRNA[c]	evm.model.scaffold00178.21	evm.model.scaffold00178.21	Cysteinyl-tRNA synthetase	6.1.1.16	Cysteine metabolism
r362	H2O[c] + PAP[c] -> PI[c] + AMP[c]	evm.model.scaffold00253.12	evm.model.scaffold00253.12	3'(2'),5'-bisphosphate nucleotidase	3.1.3.7	Cysteine metabolism
r363	O2[c] + CYS[c] -> 3SULALA[c]	evm.model.scaffold00094.20	evm.model.scaffold00094.20	Cysteine dioxygenase	1.13.11.20	Cysteine metabolism
r364	SER[m] -> PYR[m] + NH3[m]	evm.model.scaffold00177.25;evm.model.scaffold00140.4	evm.model.scaffold00177.25;evm.model.scaffold00140.4	L-serine dehydratase	4.3.1.17	Cysteine metabolism
r365	SER[c] -> PYR[c] + NH3[c]	evm.model.scaffold00177.25;evm.model.scaffold00140.4;evm.model.scaffold00007.63;evm.model.scaffold00086.26	evm.model.scaffold00177.25;evm.model.scaffold00140.4;evm.model.scaffold00007.63;evm.model.scaffold00086.26	L-serine dehydratase	4.3.1.17	Cysteine metabolism
r366	ACCOA[c] + HSER[c] -> COA[c] + OAHSER[c]	evm.model.scaffold00023.55;evm.model.scaffold00108.29	evm.model.scaffold00023.55;evm.model.scaffold00108.29	Homoserine O-acetyltransferase	2.3.1.31	Cysteine metabolism
r367	ACCOA[c] + SER[c] -> COA[c] + ASER[c]	Gap	Gap	Serine O-acetyltransferase	2.3.1.30	Cysteine metabolism
r368	H2S[m] + ASER[m] -> AC[m] + CYS[m]	evm.model.scaffold00003.33	evm.model.scaffold00003.33	Cysteine synthase	2.5.1.47	Cysteine metabolism
r369	H2S[c] + ASER[c] -> AC[c] + CYS[c]	evm.model.scaffold00032.53	evm.model.scaffold00032.53	Cysteine synthase	2.5.1.47	Cysteine metabolism
r370	CYS[c] + AKG[c] <=> MECPYR[c] + GLU[c]	evm.model.scaffold00132.30	evm.model.scaffold00132.30	Cysteine transaminase	2.6.1.3	Cysteine metabolism
r371	CYS[m] + AKG[m] <=> MECPYR[m] + GLU[m]	evm.model.scaffold00055.47	evm.model.scaffold00055.47	Cysteine transaminase	2.6.1.3	Cysteine metabolism
r372	SAM[c] + DNACYS[c] -> SAH[c] + DNAMCYS[c]	evm.model.scaffold00148.2	evm.model.scaffold00148.2	DNA (cytosine-5-) methyltransferase	2.1.1.37	Cysteine metabolism
r373	GLU[m] -> CO2[m] + GABA[m]	evm.model.scaffold00026.43	evm.model.scaffold00026.43	Glutamate decarboxylase	4.1.1.15	Glutamate and glutamine metabolism
r374	GLU[c] -> CO2[c] + GABA[c]	evm.model.scaffold00155.22;evm.model.scaffold00014.77	evm.model.scaffold00155.22;evm.model.scaffold00014.77	Glutamate decarboxylase	4.1.1.15	Glutamate and glutamine metabolism
r375	O2[c] + DHYXPENT[c] -> FOR[c] + MTHIOBUT[c]	evm.model.scaffold00080.33	evm.model.scaffold00080.33	Acireductone dioxygenase [iron(II)-requiring]	1.13.11.54	Glutamate and glutamine metabolism
r376	NAD[c] + H2O[c] + SUCCSAL[c] -> NADH[c] + SUCC[c]	evm.model.scaffold00008.63	evm.model.scaffold00008.63	Succinate-semialdehyde dehydrogenase	1.2.1.16	Glutamate and glutamine metabolism
r377	NADP[c] + H2O[c]+ SUCCSAL[c] -> NADPH[c] + SUCC[c]	evm.model.scaffold00008.63	evm.model.scaffold00008.63	Succinate-semialdehyde dehydrogenase	1.2.1.16	Glutamate and glutamine metabolism	Added reaction
r378	NADPH[c] + AKG[c] + GLN[c] -> NADP[c] + 2 GLU[c]	evm.model.scaffold00184.15	evm.model.scaffold00184.15	Glutamate synthase (NADPH)	1.4.1.13	Glutamate and glutamine metabolism
r379	NADH[c] + AKG[c] + GLN[c] -> NAD[c] + 2 GLU[c]	evm.model.scaffold00184.15;evm.model.scaffold00069.27	evm.model.scaffold00184.15;evm.model.scaffold00069.27	Glutamate synthase (NADH)	1.4.1.14	Glutamate and glutamine metabolism
r380	NAD[c] + GLU[c] <=> NADH[c] + AKG[c] + NH3[c]	evm.model.scaffold00212.3;evm.model.scaffold00029.51	evm.model.scaffold00212.3;evm.model.scaffold00029.51	NAD-dependent glutamate dehydrogenase	1.4.1.2	Glutamate and glutamine metabolism
r381	H2O[m] + NADP[m] + GLU[m] <=> AKG[m] + NADPH[m] + NH3[m]	evm.model.scaffold00110.14	evm.model.scaffold00110.14	Glutamate dehydrogenase	1.4.1.3	Glutamate and glutamine metabolism
r382	H2O[c] + NADP[c] + GLU[c] <=> AKG[c] + NADPH[c] + NH3[c]	evm.model.scaffold00110.14	evm.model.scaffold00110.14	Glutamate dehydrogenase	1.4.1.3	Glutamate and glutamine metabolism
r383	ACCOA[c] + GA6P[c] <=> COA[c] + NAGA6P[c]	evm.model.scaffold00131.11;evm.model.scaffold00116.9	evm.model.scaffold00131.11;evm.model.scaffold00116.9	Glucosamine-phosphate N-acetyltransferase	2.3.1.4	Glutamate and glutamine metabolism
r384	AKG[m] + GABA[m] -> GLU[m] + SUCCSAL[m]	evm.model.scaffold00001.23	evm.model.scaffold00001.23	4-aminobutyrate-2-oxoglutarate transaminase	2.6.1.19	Glutamate and glutamine metabolism
r385	AKG[c] + GABA[c] -> GLU[c] + SUCCSAL[c]	evm.model.scaffold00093.23	evm.model.scaffold00093.23	4-aminobutyrate-2-oxoglutarate transaminase	2.6.1.19	Glutamate and glutamine metabolism
r386	AKG[p] + GABA[p] -> GLU[p] + SUCCSAL[p]	evm.model.scaffold00001.23	evm.model.scaffold00001.23	4-aminobutyrate-2-oxoglutarate transaminase	2.6.1.19	Glutamate and glutamine metabolism
r387	ATP[c] + NH3[c] + GLU[c] -> ADP[c] + PI[c] + GLN[c]	evm.model.scaffold00313.6;evm.model.scaffold00006.50;evm.model.scaffold00076.15	evm.model.scaffold00313.6;evm.model.scaffold00006.50;evm.model.scaffold00076.15	Glutamine synthetase	6.3.1.2	Glutamate and glutamine metabolism
r388	F6P[c] + GLN[c] -> GA6P[c] + GLU[c]	evm.model.scaffold00300.3	evm.model.scaffold00300.3	Glucosamine-fructose-6-phosphate aminotransferase	2.6.1.16	Glutamate and glutamine metabolism
r389	ATP[c] + GLU[c] + TRNA[c] -> AMP[c] + PPI[c] + LGLUTRNA[c]	evm.model.scaffold00322.3	evm.model.scaffold00322.3	Glutamyl-tRNA synthetase	6.1.1.17	Glutamate and glutamine metabolism
r390	ATP[m] + GLU[m] + TRNA[m] -> PPI[m] + AMP[m] + LGLUTRNA[m]	evm.model.scaffold00019.20	evm.model.scaffold00019.20	Glutamyl-tRNA synthetase	6.1.1.17	Glutamate and glutamine metabolism
r391	ATP[c] + GLN[c] + TRNA[c] -> AMP[c] + PPI[c] + LGLNTRNA[c]	evm.model.scaffold00108.31	evm.model.scaffold00108.31	Glutaminyl-tRNA synthetase	6.1.1.18	Glutamate and glutamine metabolism
r392	NAD[c] + 3PG[c] -> NADH[c] + PHP[c]	evm.model.scaffold00001.3;evm.model.scaffold00130.10	evm.model.scaffold00001.3;evm.model.scaffold00130.10	Phosphoglycerate dehydrogenase	1.1.1.95	Glycine, serine and threonine metabolism
r393	NAD[m] + 3PG[m] -> NADH[m] + PHP[m]	evm.model.scaffold00108.28	evm.model.scaffold00108.28	Phosphoglycerate dehydrogenase	1.1.1.95	Glycine, serine and threonine metabolism
r394	ATP[m] + GLYCTE[m] <=> ADP[m] + 3PG[m]	evm.model.scaffold00045.4	evm.model.scaffold00045.4	Glycerate kinase	2.7.1.31	Glycine, serine and threonine metabolism
r395	GLU[c] + PHP[c] -> AKG[c] + 3PSER[c]	evm.model.scaffold00180.17	evm.model.scaffold00180.17	Phosphoserine aminotransferase	2.6.1.52	Glycine, serine and threonine metabolism
r396	3PSER[c] -> PI[c] + SER[c]	evm.model.scaffold00535.2	evm.model.scaffold00535.2	Phosphoserine phosphatase	3.1.3.3	Glycine, serine and threonine metabolism
r397	NADPH[c] + ASPSA[c] -> NADP[c] + HSER[c]	evm.model.scaffold00038.67	evm.model.scaffold00038.67	Homoserine dehydrogenase	1.1.1.3	Glycine, serine and threonine metabolism
r398	NADPH[m] + ASPSA[m] -> NADP[m] + HSER[m]	evm.model.scaffold00235.18	evm.model.scaffold00235.18	Homoserine dehydrogenase	1.1.1.3	Glycine, serine and threonine metabolism
r399	ATP[c] + HSER[c] -> ADP[c] + PHSER[c]	evm.model.scaffold00129.21	evm.model.scaffold00129.21	Homoserine kinase	2.7.1.39	Glycine, serine and threonine metabolism
r400	THR[c] -> ACAL[c] + GLY[c]	evm.model.scaffold00044.48	evm.model.scaffold00044.48	Threonine aldolase	4.1.2.5	Glycine, serine and threonine metabolism
r401	THR[m] -> ACAL[m] + GLY[m]	evm.model.scaffold00044.48	evm.model.scaffold00044.48	Threonine aldolase	4.1.2.5	Glycine, serine and threonine metabolism
r402	NAD[m] + GLY[m] + THF[m] -> NADH[m] + CO2[m] + NH3[m] + METTHF[m]	evm.model.scaffold00251.11	evm.model.scaffold00251.11	Aminomethyltransferase	2.1.2.10	Glycine, serine and threonine metabolism
r403	SER[m] + THF[m] <=> GLY[m] + METTHF[m]	evm.model.scaffold00011.64	evm.model.scaffold00011.64	Glycine hydroxymethyltransferase	2.1.2.1	Glycine, serine and threonine metabolism
r404	SER[c] + THF[c] <=> GLY[c] + METTHF[c]	evm.model.scaffold00011.64;evm.model.scaffold00026.20	evm.model.scaffold00011.64;evm.model.scaffold00026.20	Glycine hydroxymethyltransferase	2.1.2.1	Glycine, serine and threonine metabolism
r405	CHO[e] + PQ[e] -> BETALD[e] + PQH2[e]	evm.model.scaffold00105.23	evm.model.scaffold00105.23	Choline dehydrogenase	1.1.99.1	Glycine, serine and threonine metabolism
r406	CHO[c] + PQ[c] -> BETALD[c] + PQH2[c]	evm.model.scaffold00105.23	evm.model.scaffold00105.23	Choline dehydrogenase	1.1.99.1	Glycine, serine and threonine metabolism
r407	H2O[c] + O2[c] + SARC[c] -> FALD[c] + H2O2[c] + GLY[c]	evm.model.scaffold00045.61	evm.model.scaffold00045.61	Sarcosine oxidase	1.5.3.1	Glycine, serine and threonine metabolism
r408	SER[c] + HCYS[c] -> LLCT[c]	evm.model.scaffold00046.7	evm.model.scaffold00046.7	Cystathionine beta-synthase	4.2.1.22	Glycine, serine and threonine metabolism
r409	SER[m] + HCYS[m] -> LLCT[m]	evm.model.scaffold00246.22	evm.model.scaffold00246.22	Cystathionine beta-synthase	4.2.1.22	Glycine, serine and threonine metabolism
r410	ATP[m] + TRNA[m] + SER[m] -> PPI[m] + AMP[m] + LSERTRNA[m]	evm.model.scaffold00248.8	evm.model.scaffold00248.8	Seryl-tRNA synthetase	6.1.1.11	Glycine, serine and threonine metabolism
r411	ATP[c] + TRNA[c] + SER[c] -> AMP[c] + PPI[c] + LSERTRNA[c]	evm.model.scaffold00041.8;evm.model.scaffold00121.30;evm.model.scaffold00248.8	evm.model.scaffold00041.8;evm.model.scaffold00121.30;evm.model.scaffold00248.8	Seryl-tRNA synthetase	6.1.1.11	Glycine, serine and threonine metabolism
r412	ATP[c] + TRNA[c] + GLY[c] -> AMP[c] + PPI[c] + GLYTRNA[c]	evm.model.scaffold00007.36;evm.model.scaffold00043.29	evm.model.scaffold00007.36;evm.model.scaffold00043.29	Glycyl-tRNA synthetase	6.1.1.14	Glycine, serine and threonine metabolism
r413	ATP[c] + TRNA[c] + THR[c] -> AMP[c] + PPI[c] + LTHETRNA[c]	evm.model.scaffold00136.4;evm.model.scaffold00140.18	evm.model.scaffold00136.4;evm.model.scaffold00140.18	Threonyl tRNA synthetase	6.1.1.3	Glycine, serine and threonine metabolism
r414	H2O[c] + PHSER[c] -> PI[c] + THR[c]	evm.model.scaffold00056.7	evm.model.scaffold00056.7	Threonine synthase	4.2.3.1	Glycine, serine and threonine metabolism
r415	THR[c] -> NH3[c] + OBUT[c]	evm.model.scaffold00007.63	evm.model.scaffold00007.63	Threonine dehydratase	4.3.1.19	Glycine, serine and threonine metabolism
r416	THR[m] -> NH3[m] + OBUT[m]	evm.model.scaffold00007.63;evm.model.scaffold00014.28	evm.model.scaffold00007.63;evm.model.scaffold00014.28	Threonine dehydratase	4.3.1.19	Glycine, serine and threonine metabolism
r417	SUCCOA[m] + GLY[m] -> COA[m] + CO2[m] + AMIEVUL[m]	evm.model.scaffold00206.16;evm.model.scaffold00011.54	evm.model.scaffold00206.16;evm.model.scaffold00011.54	5-aminolevulinic acid synthase	2.3.1.37	Glycine, serine and threonine metabolism
r418	SUCCOA[c] + GLY[c] -> COA[c] + CO2[c + AMIEVUL[c]	evm.model.scaffold00011.54	evm.model.scaffold00011.54	5-aminolevulinic acid synthase	2.3.1.37	Glycine, serine and threonine metabolism	Updated reaction
r419	GLY[m] + LIPO[m] <=> CO2[m] + SAP[m]	evm.model.scaffold00101.18	evm.model.scaffold00101.18	Glycine dehydrogenase	1.4.4.2	Glycine, serine and threonine metabolism
r420	GLY[c] + LIPO[c] <=> CO2[c] + SAP[c]	evm.model.scaffold00101.18	evm.model.scaffold00101.18	Glycine dehydrogenase	1.4.4.2	Glycine, serine and threonine metabolism
r421	SER[c] <=> DSER[c]	evm.model.scaffold00086.26;evm.model.scaffold00007.63	evm.model.scaffold00086.26;evm.model.scaffold00007.63	Serine racemase	5.1.1.18	Glycine, serine and threonine metabolism
r422	THR[m] <=> GLY[m]+ ACAL[m]	evm.model.scaffold00105.10	evm.model.scaffold00105.10	low-specificity L-threonine aldolase	4.1.2.48	Glycine, serine and threonine metabolism	Updated reaction
r423	SER[c] <=> PYR[c] + NH3[c]	evm.model.scaffold00014.28	evm.model.scaffold00014.28	Threonine dehydratase	4.3.1.19	Glycine, serine and threonine metabolism
r424	BETALD[c] + NAD[c] + H2O[c] -> GLYBET[c] + NADH[c]	evm.model.scaffold00208.10	evm.model.scaffold00208.10	betaine-aldehyde dehydrogenase	1.2.1.8	Glycine, serine and threonine metabolism
r425	THR[c] + NAD[c] -> AMOXOBU[c] + NADH[c]	evm.model.scaffold00253.11	evm.model.scaffold00253.11	L-threonine 3-dehydrogenase	1.1.1.103	Glycine, serine and threonine metabolism
r426	THR[m] + NAD[m] -> AMOXOBU[m] + NADH[m]	evm.model.scaffold00253.11	evm.model.scaffold00253.11	L-threonine 3-dehydrogenase	1.1.1.103	Glycine, serine and threonine metabolism
r427	PRFP[c] -> PRLP[c]	evm.model.scaffold00053.21	evm.model.scaffold00053.21	5-proFAR isomerase	5.3.1.16	Histidine metabolism
r428	GLU[c] + IMACP[c] -> AKG[c] + HISOLP[c]	evm.model.scaffold00069.37;evm.model.scaffold00188.19	evm.model.scaffold00069.37;evm.model.scaffold00188.19	Histidinol-phosphate aminotransferase	2.6.1.9	Histidine metabolism
r429	HISOLP[c] -> PI[c] + HISOL[c]	evm.model.scaffold00024.7	evm.model.scaffold00024.7	Histidinol-phosphatase	3.1.3.15	Histidine metabolism
r430	2 NAD[c] + HISOL[c] -> 2 NADH[c] + HIS[c]	evm.model.scaffold00340.1	evm.model.scaffold00340.1	Histidinol dehydrogenase	1.1.1.23	Histidine metabolism
r431	ATP[c] + PRPP[c] -> PPI[c] + PRBATP[c]	evm.model.scaffold00041.48;evm.model.scaffold00151.17	evm.model.scaffold00041.48;evm.model.scaffold00151.17	ATP phosphoribosyltransferase	2.4.2.17	Histidine metabolism
r432	DIMGP[c] -> IMACP[c]	evm.model.scaffold00145.11; evm.model.scaffold00590.1	evm.model.scaffold00145.11; evm.model.scaffold00590.1	Imidazoleglycerol-phosphate dehydratase	4.2.1.19	Histidine metabolism
r433	ATP[c] + TRNA[c] + HIS[c] -> AMP[c] + PPI[c] + HHTRNA[c]	evm.model.scaffold00090.36;evm.model.scaffold00027.5	evm.model.scaffold00090.36;evm.model.scaffold00027.5	Histidyl-tRNA synthetase	6.1.1.21	Histidine metabolism
r434	ARG[p] + NADPH[p] + O2[p] -> CITR[p] + NITOXE[p] + NADP[p]	Gap	Gap	Nitric-oxide synthase (NADPH)	1.14.13.39	Histidine metabolism
r435	PRBATP[c] -> PPI[c] + PRBAMP[c]	evm.model.scaffold00340.1	evm.model.scaffold00340.1	Phosphoribosyl-ATP diphosphatase	3.6.1.31	Histidine metabolism
r436	PRBAMP[c] -> PRFP[c]	evm.model.scaffold00340.1	evm.model.scaffold00340.1	Phosphoribosyl-AMP cyclohydrolase	3.5.4.19	Histidine metabolism
r437	GLN[c] + PRLP[c] -> GLU[c] + DIMGP[c] + AICAR[c]	Gap	Gap	Glutamine amidotransferas; cyclase	2.4.2.-; 4.1.3.-	Histidine metabolism
r438	AKG[c] + ILE[c] <=> GLU[c] + OMVAL[c]	evm.model.scaffold00057.22	evm.model.scaffold00057.22	Branched chain amino acid aminotransferase	2.6.1.42	Valine, leucine and isoleucine metabolism (Branched-chain amino acids)
r439	AKG[m] + ILE[m] <=> GLU[m] + OMVAL[m]	evm.model.scaffold00071.44	evm.model.scaffold00071.44	Branched chain amino acid aminotransferase	2.6.1.42	Valine, leucine and isoleucine metabolism (Branched-chain amino acids)
r440	AKG[c] + VAL[c] <=> GLU[c] + OIVAL[c]	evm.model.scaffold00057.22	evm.model.scaffold00057.22	Branched chain amino acid aminotransferase	2.6.1.42	Valine, leucine and isoleucine metabolism (Branched-chain amino acids)
r441	AKG[m] + VAL[m] <=> GLU[m] + OIVAL[m]	evm.model.scaffold00071.44	evm.model.scaffold00071.44	Branched chain amino acid aminotransferase	2.6.1.42	Valine, leucine and isoleucine metabolism (Branched-chain amino acids)
r442	AKG[c] + LEU[c] <=> GLU[c] + OICAP[c]	evm.model.scaffold00057.22	evm.model.scaffold00057.22	Branched chain amino acid aminotransferase	2.6.1.42	Valine, leucine and isoleucine metabolism (Branched-chain amino acids)
r443	AKG[m] + LEU[m] <=> GLU[m] + OICAP[m]	evm.model.scaffold00071.44;evm.model.scaffold00075.25	evm.model.scaffold00071.44;evm.model.scaffold00075.25	Branched chain amino acid aminotransferase	2.6.1.42	Valine, leucine and isoleucine metabolism (Branched-chain amino acids)
r444	PYR[m] + OBUT[m] -> CO2[m] + ABUT[m]	evm.model.scaffold00172.11	evm.model.scaffold00172.11	Acetolactate synthase	2.2.1.6	Valine, leucine and isoleucine metabolism (Branched-chain amino acids)
r445	PYR[c] + OBUT[c] -> CO2[c] + ABUT[c]	evm.model.scaffold00034.11	evm.model.scaffold00034.11	Acetolactate synthase	2.2.1.6	Valine, leucine and isoleucine metabolism (Branched-chain amino acids)
r446	2 PYR[m] -> CO2[m] + ACLAC[m]	evm.model.scaffold00172.11;evm.model.scaffold00104.19	evm.model.scaffold00172.11;evm.model.scaffold00104.19	Acetolactate synthase	2.2.1.6	Valine, leucine and isoleucine metabolism (Branched-chain amino acids)
r447	2 PYR[c] -> CO2[c] + ACLAC[c]	evm.model.scaffold00034.11	evm.model.scaffold00034.11	Acetolactate synthase	2.2.1.6	Valine, leucine and isoleucine metabolism (Branched-chain amino acids)
r448	ALA[m] + OIVAL[m] <=> PYR[m] + VAL[m]	evm.model.scaffold00155.2	evm.model.scaffold00155.2	Valine-pyruvate aminotransferase	2.6.1.66	Valine, leucine and isoleucine metabolism (Branched-chain amino acids)
r449	NADPH[m] + ACLAC[m] -> NADP[m] + DHVAL[m]	evm.model.scaffold00104.18; evm.model.scaffold00050.29	evm.model.scaffold00104.18; evm.model.scaffold00050.29	Ketol-acid reductoisomerase	1.1.1.86	Valine, leucine and isoleucine metabolism (Branched-chain amino acids)
r450	NADPH[m] + ABUT[m] -> NADP[m] + DHMVA[m]	evm.model.scaffold00104.18; evm.model.scaffold00050.29	evm.model.scaffold00104.18; evm.model.scaffold00050.29	Ketol-acid reductoisomerase	1.1.1.86	Valine, leucine and isoleucine metabolism (Branched-chain amino acids)
r451	DHVAL[m] -> OIVAL[m]	evm.model.scaffold00017.28	evm.model.scaffold00017.28	Dihydroxy-acid dehydratase	4.2.1.9	Valine, leucine and isoleucine metabolism (Branched-chain amino acids)
r452	DHVAL[c] -> OIVAL[c]	evm.model.scaffold00017.28	evm.model.scaffold00017.28	Dihydroxy-acid dehydratase	4.2.1.9	Valine, leucine and isoleucine metabolism (Branched-chain amino acids)
r453	DHMVA[m] -> OMVAL[m]	evm.model.scaffold00017.28;evm.model.scaffold00031.51	evm.model.scaffold00017.28;evm.model.scaffold00031.51	Dihydroxy-acid dehydratase	4.2.1.9	Valine, leucine and isoleucine metabolism (Branched-chain amino acids)
r454	DHMVA[c] -> OMVAL[c]	evm.model.scaffold00017.28	evm.model.scaffold00017.28	Dihydroxy-acid dehydratase	4.2.1.9	Valine, leucine and isoleucine metabolism (Branched-chain amino acids)
r455	ACCOA[c] + OIVAL[c] -> COA[c] + IPPMAL[c]	evm.model.scaffold00010.68	evm.model.scaffold00010.68	2-isopropylmalate synthase	2.3.3.13	Valine, leucine and isoleucine metabolism (Branched-chain amino acids)
r456	PPMAL[c] <=> IPPMAL[c]	evm.model.scaffold00050.6	evm.model.scaffold00050.6	3-isopropylmalate dehydratase	4.2.1.33	Valine, leucine and isoleucine metabolism (Branched-chain amino acids)
r457	CBHCAP[c] <=> IPPMAL[c]	evm.model.scaffold00050.5;evm.model.scaffold00118.17;evm.model.scaffold00041.30;evm.model.scaffold00209.3;evm.model.scaffold00050.6	evm.model.scaffold00050.5;evm.model.scaffold00118.17;evm.model.scaffold00041.30;evm.model.scaffold00209.3;evm.model.scaffold00050.6	3-isopropylmalate dehydratase	4.2.1.33	Valine, leucine and isoleucine metabolism (Branched-chain amino acids)
r458	CBHCAP[m] <=> IPPMAL[m]	evm.model.scaffold00050.5;evm.model.scaffold00272.9;evm.model.scaffold00118.17;evm.model.scaffold00041.30	evm.model.scaffold00050.5;evm.model.scaffold00272.9;evm.model.scaffold00118.17;evm.model.scaffold00041.30	3-isopropylmalate dehydratase	4.2.1.33	Valine, leucine and isoleucine metabolism (Branched-chain amino acids)
r459	NAD[c] + IPPMAL[c] -> NADH[c] + CO2[c] + OICAP[c]	evm.model.scaffold00104.17	evm.model.scaffold00104.17	3-isopropylmalate dehydrogenase	1.1.1.85	Valine, leucine and isoleucine metabolism (Branched-chain amino acids)
r460	NAD[m] + COA[m] + OIVAL[m] -> NADH[m] + CO2[m] + ISOBUCOA[m]	evm.model.scaffold00256.6	evm.model.scaffold00256.6	2-oxoisovalerate dehydrogenase complex	1.2.4.4: 1.8.1.4: 2.3.1.168	Valine, leucine and isoleucine metabolism (Branched-chain amino acids)
r461	NAD[m] + COA[m] + OMVAL[m] -> NADH[m] + CO2[m] + METBUCOA[m]	evm.model.scaffold00256.6	evm.model.scaffold00256.6	2-oxoisovalerate dehydrogenase complex	1.2.4.4: 1.8.1.4: 2.3.1.168	Valine, leucine and isoleucine metabolism (Branched-chain amino acids)
r462	NAD[m] + COA[m] + OICAP[m] -> NADH[m] + CO2[m] + ISOVACOA[m]	evm.model.scaffold00256.6;evm.model.scaffold00192.6	evm.model.scaffold00256.6;evm.model.scaffold00192.6	2-oxoisovalerate dehydrogenase complex	1.2.4.4: 1.8.1.4: 2.3.1.168	Valine, leucine and isoleucine metabolism (Branched-chain amino acids)
r463	FAD[m] + METBUCOA[m] -> FADH2[m] + MCRCOA[m]	evm.model.scaffold00073.16	evm.model.scaffold00073.16	Isovaleryl-CoA dehydrogenase	1.3.99.10	Valine, leucine and isoleucine metabolism (Branched-chain amino acids)
r464	FAD[m] + METBUCOA[c] -> FADH2[m] + MCRCOA[c]	evm.model.scaffold00073.16	evm.model.scaffold00073.16	Isovaleryl-CoA dehydrogenase	1.3.99.10	Valine, leucine and isoleucine metabolism (Branched-chain amino acids)
r465	ATP[c] + HCO3[c] + MCRCOA[c] -> ADP[c] + PI[c] + MGCOA[c]	evm.model.scaffold00234.3; evm.model.scaffold00085.15	evm.model.scaffold00234.3; evm.model.scaffold00085.15	Methylcrotoyl-CoA carboxylase	6.4.1.4	Valine, leucine and isoleucine metabolism (Branched-chain amino acids)
r466	ATP[m] + HCO3[m] + MCRCOA[m] -> PI[m] + ADP[m] + MGCOA[m]	evm.model.scaffold00215.6;evm.model.scaffold00201.14	evm.model.scaffold00215.6;evm.model.scaffold00201.14	Methylcrotoyl-CoA carboxylase	6.4.1.4	Valine, leucine and isoleucine metabolism (Branched-chain amino acids)
r467	H2O[m] + MGCOA[m] <=> H3MCOA[m]	evm.model.scaffold00245.4	evm.model.scaffold00245.4	Methylglutaconyl-CoA hydratase	4.2.1.18	Valine, leucine and isoleucine metabolism (Branched-chain amino acids)
r468	H2O[c] + MGCOA[c] <=> H3MCOA[c]	evm.model.scaffold00083.29	evm.model.scaffold00083.29	Methylglutaconyl-CoA hydratase	4.2.1.18	Valine, leucine and isoleucine metabolism (Branched-chain amino acids)
r469	COA[c] + H3MCOA[c] -> ACCOA[c] + ACTAC[c]	evm.model.scaffold00301.1	evm.model.scaffold00301.1	3-hydroxymethyl-3-methylglutaryl-CoA lyase	4.1.3.4	Valine, leucine and isoleucine metabolism (Branched-chain amino acids)
r470	FAD[m] + ISOBUCOA[c] -> FADH2[m] + MCRLCOA[c]	evm.model.scaffold00068.17	evm.model.scaffold00068.17	Acyl-CoA dehydrogenase	1.3.99.3	Valine, leucine and isoleucine metabolism (Branched-chain amino acids)
r471	H2O[c] + MCRLCOA[c] -> HYISOBYCOA[c]	evm.model.scaffold00329.7	evm.model.scaffold00329.7	Enoyl-CoA hydratase	4.2.1.17	Valine, leucine and isoleucine metabolism (Branched-chain amino acids)
r472	H2O[m] + MCRLCOA[m] -> HYISOBYCOA[m]	evm.model.scaffold00245.4	evm.model.scaffold00245.4	Enoyl-CoA hydratase	4.2.1.17	Valine, leucine and isoleucine metabolism (Branched-chain amino acids)
r473	H2O[m] + HYISOBYCOA[m] -> COA[m] + HYISOBYR[m]	evm.model.scaffold00215.5	evm.model.scaffold00215.5	3-hydroxyisobutyryl-CoA hydrolase	3.1.2.4	Valine, leucine and isoleucine metabolism (Branched-chain amino acids)
r474	H2O[b] + HYISOBYCOA[b] -> COA[b] + HYISOBYR[b]	evm.model.scaffold00296.7;evm.model.scaffold00317.11	evm.model.scaffold00296.7;evm.model.scaffold00317.11	3-hydroxyisobutyryl-CoA hydrolase	3.1.2.4	Valine, leucine and isoleucine metabolism (Branched-chain amino acids)
r475	HYISOCOA[c] + H2O[c] -> HYISORATE[c] + COA[c]	evm.model.scaffold00054.6	evm.model.scaffold00054.6	3-hydroxyisobutyryl-CoA hydrolase	3.1.2.4	Valine, leucine and isoleucine metabolism (Branched-chain amino acids)
r476	HYISOCOA[m] + H2O[m] -> HYISORATE[m] + COA[m]	evm.model.scaffold00112.13	evm.model.scaffold00112.13	3-hydroxyisobutyryl-CoA hydrolase	3.1.2.4	Valine, leucine and isoleucine metabolism (Branched-chain amino acids)
r477	NAD[m] + HYISOBYR[m] <=> NADH[m] + MMSHY[m]	evm.model.scaffold00152.18	evm.model.scaffold00152.18	3-hydroxyisobutyrate dehydrogenase	1.1.1.31	Valine, leucine and isoleucine metabolism (Branched-chain amino acids)
r478	NAD[m] + COA[m] + MMSHY[m] -> NADH[m] + CO2[m] + PROPCOA[m]	evm.model.scaffold00033.40	evm.model.scaffold00033.40	Methylmalonate-semialdehyde dehydrogenase	1.2.1.27	Valine, leucine and isoleucine metabolism (Branched-chain amino acids)
r479	NAD[c] + COA[c] + MMSHY[c] -> NADH[c] + CO2[c] + PROPCOA[c]	evm.model.scaffold00033.40	evm.model.scaffold00033.40	Methylmalonate-semialdehyde dehydrogenase	1.2.1.27	Valine, leucine and isoleucine metabolism (Branched-chain amino acids)
r480	FAD[m] + METBUCOA[c] -> FADH2[m] + MEBUELCOA[c]	evm.model.scaffold00068.17	evm.model.scaffold00068.17	Acyl-CoA dehydrogenase	1.3.99.3	Valine, leucine and isoleucine metabolism (Branched-chain amino acids)
r481	H2O[c] + MEBUELCOA[c] -> METBYCOA[c]	evm.model.scaffold00329.7	evm.model.scaffold00329.7	Enoyl-CoA hydratase	4.2.1.17	Valine, leucine and isoleucine metabolism (Branched-chain amino acids)
r482	H2O[m] + MEBUELCOA[m] -> METBYCOA[m]	evm.model.scaffold00245.4	evm.model.scaffold00245.4	Enoyl-CoA hydratase	4.2.1.17	Valine, leucine and isoleucine metabolism (Branched-chain amino acids)
r483	NAD[m] + METBYCOA[m] <=> NADH[m] + MCECOA[m]	evm.model.scaffold00057.6	evm.model.scaffold00057.6	3-hydroxyacyl-CoA dehydrogenase	1.1.1.35	Valine, leucine and isoleucine metabolism (Branched-chain amino acids)
r484	NAD[b] + METBYCOA[b] <=> NADH[b] + MCECOA[b]	evm.model.scaffold00046.13	evm.model.scaffold00046.13	3-hydroxy-2-methylbutyryl-CoA dehydrogenase	1.1.1.178	Valine, leucine and isoleucine metabolism (Branched-chain amino acids)
r485	COA[p] + MCECOA[p] -> ACCOA[p] + PROPCOA[p]	evm.model.scaffold00006.45;evm.model.scaffold00071.21	evm.model.scaffold00006.45;evm.model.scaffold00071.21	3-ketoacyl-CoA thiolase	2.3.1.16	Valine, leucine and isoleucine metabolism (Branched-chain amino acids)
r486	COA[m] + MCECOA[m] -> ACCOA[m] + PROPCOA[m]	evm.model.scaffold00090.24;evm.model.scaffold00071.21;evm.model.scaffold00265.8	evm.model.scaffold00090.24;evm.model.scaffold00071.21;evm.model.scaffold00265.8	3-ketoacyl-CoA thiolase	2.3.1.16	Valine, leucine and isoleucine metabolism (Branched-chain amino acids)
r487	COA[c] + MCECOA[c] -> ACCOA[c] + PROPCOA[c]	evm.model.scaffold00090.24;evm.model.scaffold00073.35	evm.model.scaffold00090.24;evm.model.scaffold00073.35	3-ketoacyl-CoA thiolase	2.3.1.16	Valine, leucine and isoleucine metabolism (Branched-chain amino acids)
r488	ATP[p] + PROPCOA[p] + HCO3[p] -> ADP[p] + PI[p] + SMMNYLCOA[p]	evm.model.scaffold00173.7	evm.model.scaffold00173.7	Propionyl-CoA carboxylase	6.4.1.3	Valine, leucine and isoleucine metabolism (Branched-chain amino acids)
r489	ATP[m] + PROPCOA[m] + HCO3[m] -> ADP[m] + PI[m] + SMMNYLCOA[m]	evm.model.scaffold00225.11;evm.model.scaffold00009.23	evm.model.scaffold00225.11;evm.model.scaffold00009.23	Propionyl-CoA carboxylase	6.4.1.3	Valine, leucine and isoleucine metabolism (Branched-chain amino acids)
r490	ATP[c] + TRNA[c] + ILE[c] -> AMP[c] + PPI[c] + LILEUTRNA[c]	evm.model.scaffold00129.19	evm.model.scaffold00129.19	Isoleucyl-tRNA synthetase	6.1.1.5	Valine, leucine and isoleucine metabolism (Branched-chain amino acids)
r491	ATP[m] + TRNA[m] + ILE[m] -> PPI[m] + AMP[m] + LILEUTRNA[m]	evm.model.scaffold00216.7	evm.model.scaffold00216.7	Isoleucyl-tRNA synthetase	6.1.1.5	Valine, leucine and isoleucine metabolism (Branched-chain amino acids)
r492	ATP[c] + TRNA[c] + VAL[c] -> AMP[c] + PPI[c] + LValTRNA[c]	evm.model.scaffold00092.30;evm.model.scaffold00141.13	evm.model.scaffold00092.30;evm.model.scaffold00141.13	Valyl-tRNA synthetase	6.1.1.9	Valine, leucine and isoleucine metabolism (Branched-chain amino acids)
r493	ATP[c] + TRNA[c] + LEU[c] -> AMP[c] + PPI[c] + LLeuTRNA[c]	evm.model.scaffold00020.23;evm.model.scaffold00171.6	evm.model.scaffold00020.23;evm.model.scaffold00171.6	Leucyl-tRNA synthetase	6.1.1.4	Valine, leucine and isoleucine metabolism (Branched-chain amino acids)
r494	ATP[m] + TRNA[m] + LEU[m] -> AMP[m] + PPI[m] + LLeuTRNA[m]	evm.model.scaffold00020.23	evm.model.scaffold00020.23	Leucyl-tRNA synthetase	6.1.1.4	Valine, leucine and isoleucine metabolism (Branched-chain amino acids)
r495	ACCOA[c] + H2O[c] + AKG[c] -> COA[c] + HCIT[c]	evm.model.scaffold00099.37	evm.model.scaffold00099.37	Homocitrate synthase	2.3.3.14	Lysine metabolism
r496	ACCOA[m] + H2O[m] + AKG[m] -> COA[m] + HCIT[m]	evm.model.scaffold00033.47	evm.model.scaffold00033.47	Homocitrate synthase	2.3.3.14	Lysine metabolism
r497	HCIT[c] <=> HICIT[c]	evm.model.scaffold00209.3	evm.model.scaffold00209.3	Homoaconitase	4.2.1.36	Lysine metabolism
r498	NAD[c] + HICIT[c] <=> NADH[c] + CO2[c] + AKA[c]	evm.model.scaffold00183.13	evm.model.scaffold00183.13	Homoisocitrate dehydrogenase	1.1.1.87	Lysine metabolism
r499	TYR[c] + AKG[c] <=> GLU[c] + 4HPP[c]	evm.model.scaffold00012.64	evm.model.scaffold00012.64	Tyrosine aminotransferase	2.6.1.5	Lysine metabolism
r500	ATP[c] + NADPH[c] + AMA[c] -> NADP[c] + AMASA[c] + AMP[c] + PPI[c]	evm.model.scaffold00033.44	evm.model.scaffold00033.44	Alpha-amnoiadipate reductase	1.2.1.31	Lysine metabolism
r501	ATP[b] + NADPH[b] + AMA[b] -> NADP[b] + AMASA[b] + AMP[b] + PPI[b]	evm.model.scaffold00033.44	evm.model.scaffold00033.44	Alpha-amnoiadipate reductase	1.2.1.31	Lysine metabolism
r502	NADPH[c] + GLU[c] + AMASA[c] <=> NADP[c] + SACP[c]	evm.model.scaffold00085.27	evm.model.scaffold00085.27	Saccharopine dehydrogenase (NADP, L-glutamate-forming)	1.5.1.10	Lysine metabolism
r503	NADH[m] + GLU[m] + AMASA[m] <=> NAD[m] + SACP[m]	evm.model.scaffold00006.59	evm.model.scaffold00006.59	Saccharopine dehydrogenase (NAD, L-glutamate forming)	1.5.1.9	Lysine metabolism
r504	NADPH[m] + AKG[m] + LYS[m] <=> NADP[m] + SACP[m]	evm.model.scaffold00006.59	evm.model.scaffold00006.59	Saccharopine dehydrogenase (NADP, L-lysine-forming)	1.5.1.8	Lysine metabolism
r505	NADH[m] + AKG[m] + LYS[m] <=> NAD[m] + SACP[m]	evm.model.scaffold00008.17	evm.model.scaffold00008.17	Saccharopine dehydrogenase (NAD, L-lysine forming)	1.5.1.7	Lysine metabolism
r506	NADH[c] + AKG[c] + LYS[c] <=> NAD[c] + SACP[c]	evm.model.scaffold00054.47	evm.model.scaffold00054.47	Saccharopine dehydrogenase (NAD, L-lysine forming)	1.5.1.7	Lysine metabolism
r507	NAD[c] + H2O[c] + ALA[c] -> NADH[c] + PYR[c] + NH3[c]	evm.model.scaffold00054.47	evm.model.scaffold00054.47	Alanine dehydrogenase	1.4.1.1	Lysine metabolism
r508	NAD[m] + H2O[m] + ALA[m] -> NADH[m] + PYR[m] + NH3[m]	evm.model.scaffold00008.17	evm.model.scaffold00008.17	Alanine dehydrogenase	1.4.1.1	Lysine metabolism
r509	PYR[c] + ASPSA[c] -> 2 H2O[c] + DIDIPC[c]	evm.model.scaffold00174.8	evm.model.scaffold00174.8	Dihydrodipicolinate synthase	4.2.1.52	Lysine metabolism
r510	ATP[c] + TRNA[c] + LYS[c] -> AMP[c] + PPI[c] + LLTRNA[c]	evm.model.scaffold00084.3;evm.model.scaffold00152.4	evm.model.scaffold00084.3;evm.model.scaffold00152.4	Lysyl-tRNA synthetase	6.1.1.6	Lysine metabolism
r511	SAM[c] + HISLYS[c] -> SAH[c] + TMLS[c]	evm.model.scaffold00162.2;evm.model.scaffold00026.44;evm.model.scaffold00030.14;evm.model.scaffold00150.1;evm.model.scaffold00224.5;evm.model.scaffold00262.23;evm.model.scaffold00066.7;evm.model.scaffold00078.2;evm.model.scaffold00162.2	evm.model.scaffold00162.2;evm.model.scaffold00026.44;evm.model.scaffold00030.14;evm.model.scaffold00150.1;evm.model.scaffold00224.5;evm.model.scaffold00262.23;evm.model.scaffold00066.7;evm.model.scaffold00078.2;evm.model.scaffold00162.2	Histone-lysine N-methyltransferase	2.1.1.43	Lysine metabolism
r512	AKG[m] + O2[m] + TMLS[m] -> CO2[m] + SUCC[m] + HTMLS[m]	evm.model.scaffold00275.5	evm.model.scaffold00275.5	Trimethyllysine dioxygenase	1.14.11.8	Lysine metabolism
r513	HTMLS[m] -> GLY[m] + TMAMMOBNAL[m]	Gap	Gap	Aldehyde-lyases	4.1.2.-	Lysine metabolism
r514	NAD[c] + H2O[c] + TMAMMOBNAL[c] <=> NADH[c] + TMAMMOBNATE[c]	evm.model.scaffold00054.16	evm.model.scaffold00054.16	NAD-dependent aldehyde dehydrogenase	1.2.1.3	Lysine metabolism
r515	NAD[m] + H2O[m] + TMAMMOBNAL[m] <=> NADH[m] + TMAMMOBNATE[m]	evm.model.scaffold00028.8	evm.model.scaffold00028.8	NAD-dependent aldehyde dehydrogenase	1.2.1.3	Lysine metabolism
r516	AKG[c] + O2[c] + TMAMMOBNATE[c] -> CO2[c] + SUCC[c] + CAR[c]	evm.model.scaffold00209.15	evm.model.scaffold00209.15	Gamma-butyrobetaine dioxygenase	1.14.11.1	Lysine metabolism
r517	GLU[c] + AKA[c] <=> AKG[c] + AMA[c]	evm.model.scaffold00018.14	evm.model.scaffold00018.14	2-aminoadipate transaminase	2.6.1.39	Lysine metabolism
r518	A6OXO[b] + NADP[b] + AMP[b] + PPI[b] -> AMA[b] + NADPH[b] + ATP[b]	evm.model.scaffold00033.44	evm.model.scaffold00033.44	L-2-aminoadipate reductase	1.2.1.95	Lysine biosynthesis
r519	A6OXO[c] + NADP[c] + AMP[c] + PPI[c] -> AMA[c] + NADPH[c] + ATP[c]	evm.model.scaffold00033.44	evm.model.scaffold00033.44	L-2-aminoadipate reductase	1.2.1.95	Lysine biosynthesis
r520	PYR[c] + ASPSA[c] -> HTET[c]+ H2O[c]	evm.model.scaffold00174.8	evm.model.scaffold00174.8	4-hydroxy-tetrahydrodipicolinate synthase	4.3.3.7	Lysine biosynthesis	Updated reaction
r521	PI[c] + 5MTA[c] -> 5THR1P[c] + AD[c]	evm.model.scaffold00079.11	evm.model.scaffold00079.11	S-methyl-5-thioadenosine phosphorylase	2.4.2.28	Methionine metabolism
r522	5THR1P[c] -> METHIR1P[c]	evm.model.scaffold00276.16	evm.model.scaffold00276.16	S-methyl-5-thioribose-1-phosphate isomerase	5.3.1.23	Methionine metabolism
r523	METHIR1P[c] -> H2O[c] + METHPENP[c]	evm.model.scaffold00142.2	evm.model.scaffold00142.2	Methylthioribulose 1-phosphate dehydratase	4.2.1.109	Methionine metabolism
r524	METHIR1P[m] -> H2O[m] + METHPENP[m]	evm.model.scaffold00142.2	evm.model.scaffold00142.2	Methylthioribulose 1-phosphate dehydratase	4.2.1.109	Methionine metabolism
r525	H2O[c] + METHPENP[c] -> PI[c] + DHYXPENT[c]	evm.model.scaffold00059.27	evm.model.scaffold00059.27	Acireductone synthase	3.1.3.77	Methionine metabolism
r526	CYS[c] + PHSER[c] -> SUCC[c] + LLCT[c]	evm.model.scaffold00017.44	evm.model.scaffold00017.44	Cystathionine gamma-synthase	2.5.1.48	Methionine metabolism
r527	H2O[m] + LLCT[m] -> PYR[m] + NH3[m] + HCYS[m]	evm.model.scaffold00007.26	evm.model.scaffold00007.26	Cystathionine beta-lyase	4.4.1.8	Methionine metabolism
r528	HCYS[c] + MTHPTGLU[c] -> THPTGLU[c] + MET[c]	evm.model.scaffold00199.11	evm.model.scaffold00199.11	5-methyltetrahydropteroyltriglutamate-homocysteine S-methyltransferase	2.1.1.14	Methionine metabolism
r529	HCYS[c] + MTHF[c] -> THF[c] + MET[c]	evm.model.scaffold00057.27	evm.model.scaffold00057.27	Methionine synthase	2.1.1.13	Methionine metabolism
r530	ATP[c] + MET[c] -> PI[c] + PPI[c] + SAM[c]	evm.model.scaffold00118.3;evm.model.scaffold00022.67	evm.model.scaffold00118.3;evm.model.scaffold00022.67	S-adenosylmethionine synthetase	2.5.1.6	Methionine metabolism
r531	SAH[c] -> HCYS[c] + ADN[c]	evm.model.scaffold00072.20	evm.model.scaffold00072.20	Adenosylhomocysteinase	3.3.1.1	Methionine metabolism
r532	H2S[c] + OAHSER[c] -> AC[c] + HCYS[c]	evm.model.scaffold00026.29;evm.model.scaffold00044.8	evm.model.scaffold00026.29;evm.model.scaffold00044.8	O-acetylhomoserine (thiol)-lyase	2.5.1.49	Methionine metabolism
r533	LLCT[c] -> NH3[c] + CYS[c] + OBUT[c]	evm.model.scaffold00043.48	evm.model.scaffold00043.48	Cystathionine gamma-lyase	4.4.1.1	Methionine metabolism
r534	LLCT[m] -> NH3[m] + CYS[m] + OBUT[m]	evm.model.scaffold00043.48	evm.model.scaffold00043.48	Cystathionine gamma-lyase	4.4.1.1	Methionine metabolism
r535	SAM[c] + HCYS[c] -> SAH[c] + MET[c]	evm.model.scaffold00219.7	evm.model.scaffold00219.7	Homocysteine S-methyltransferase	2.1.1.10	Methionine metabolism
r536	SAM[c] + CALH[c] -> SAH[c] + DPTH[c]	evm.model.scaffold00309.3	evm.model.scaffold00309.3	Diphthine synthase	2.1.1.98	Methionine metabolism
r537	ATP[c] + TRNA[c] + MET[c] -> AMP[c] + PPI[c] + LMETTRNA[c]	evm.model.scaffold00005.6	evm.model.scaffold00005.6	Methionyl-tRNA synthetase	6.1.1.10	Methionine metabolism
r538	ATP[m] + TRNA[m] + MET[m] -> AMP[m] + PPI[m] + LMETTRNA[m]	evm.model.scaffold00107.24	evm.model.scaffold00107.24	Methionyl-tRNA synthetase	6.1.1.10	Methionine metabolism
r539	ATP[e] + MET[e] + TRNA[e] -> AMP[e] + PPI [e]+ LMETTRNA[e]	evm.model.scaffold00005.6	evm.model.scaffold00005.6	Methionyl-tRNA synthetase	6.1.1.10	Methionine metabolism	Updated reaction
r540	PEP[c] + E4P[c] -> PI[c] + 3DDAH7P[c]	evm.model.scaffold00031.21;evm.model.scaffold00017.7;evm.model.scaffold00024.8; evm.model.scaffold00006.63; evm.model.scaffold00037.49; evm.model.scaffold00017.10	evm.model.scaffold00031.21;evm.model.scaffold00017.7;evm.model.scaffold00024.8; evm.model.scaffold00006.63; evm.model.scaffold00037.49; evm.model.scaffold00017.10	3-deoxy-7-phosphoheptulonate synthase	2.5.1.54	Phenylalanine, tyrosine and tryptophan biosynthesis (Aromatic amino acids)
r541	3DDAH7P[c] -> PI[c] + DQT[c]	evm.model.scaffold00051.19	evm.model.scaffold00051.19	3-dehydroquinate synthase	4.2.3.4	Phenylalanine, tyrosine and tryptophan biosynthesis (Aromatic amino acids)
r542	3DDAH7P[b] -> PI[b] + DQT[b]	evm.model.scaffold00059.40	evm.model.scaffold00059.40	3-dehydroquinate synthase	4.2.3.4	Phenylalanine, tyrosine and tryptophan biosynthesis (Aromatic amino acids)
r543	DQT[c] -> DHSK[c]	evm.model.scaffold00051.19	evm.model.scaffold00051.19	3-dehydroquinate dehydratase	4.2.1.10	Phenylalanine, tyrosine and tryptophan biosynthesis
r544	DQT[b] -> DHSK[b]	evm.model.scaffold00059.40	evm.model.scaffold00059.40	3-dehydroquinate dehydratase	4.2.1.10	Phenylalanine, tyrosine and tryptophan biosynthesis
r545	NADPH[m] + DHSK[m] -> NADP[m] + SME[m]	evm.model.scaffold00051.19	evm.model.scaffold00051.19	Shikimate dehydrogenase	1.1.1.25	Phenylalanine, tyrosine and tryptophan biosynthesis (Aromatic amino acids)
r546	NADPH[b] + DHSK[b] -> NADP[b] + SME[b]	evm.model.scaffold00059.40	evm.model.scaffold00059.40	Shikimate dehydrogenase	1.1.1.25	Phenylalanine, tyrosine and tryptophan biosynthesis (Aromatic amino acids)
r547	ATP[c] + SME[c] -> ADP[c] + SME3P[c]	evm.model.scaffold00051.19	evm.model.scaffold00051.19	Shikimate kinase	2.7.1.71	Phenylalanine, tyrosine and tryptophan biosynthesis (Aromatic amino acids)
r548	ATP[b] + SME[b] -> ADP[b] + SME3P[b]	evm.model.scaffold00059.40	evm.model.scaffold00059.40	Shikimate kinase	2.7.1.71	Phenylalanine, tyrosine and tryptophan biosynthesis (Aromatic amino acids)
r549	PEP[c] + SME3P[c] -> PI[c] + 3PSME[c]	evm.model.scaffold00051.19	evm.model.scaffold00051.19	3-phosphoshikimate 1-carboxyvinyltransferase	2.5.1.19	Phenylalanine, tyrosine and tryptophan biosynthesis (Aromatic amino acids)
r550	PEP[b] + SME3P[b] -> PI[b] + 3PSME[b]	evm.model.scaffold00059.40	evm.model.scaffold00059.40	3-phosphoshikimate 1-carboxyvinyltransferase	2.5.1.19	Phenylalanine, tyrosine and tryptophan biosynthesis (Aromatic amino acids)
r551	3PSME[c] -> PI[c] + CHOR[c]	evm.model.scaffold00038.19	evm.model.scaffold00038.19	Chorismate synthase	4.2.3.5	Phenylalanine, tyrosine and tryptophan biosynthesis (Aromatic amino acids)
r552	3PSME[m] -> PI[m] + CHOR[m]	evm.model.scaffold00038.19	evm.model.scaffold00038.19	Chorismate synthase	4.2.3.5	Phenylalanine, tyrosine and tryptophan biosynthesis (Aromatic amino acids)
r553	CHOR[c] + GLN[c] -> PYR[c] + GLU[c] + AN[c]	evm.model.scaffold00025.55; evm.model.scaffold00006.75	evm.model.scaffold00025.55; evm.model.scaffold00006.75	Anthranilate synthase	4.1.3.27	Phenylalanine, tyrosine and tryptophan biosynthesis (Aromatic amino acids)
r554	CHOR[m] + GLN[m] -> PYR[m] + GLU[m] + AN[m]	evm.model.scaffold00025.55	evm.model.scaffold00025.55	Anthranilate synthase	4.1.3.27	Phenylalanine, tyrosine and tryptophan biosynthesis (Aromatic amino acids)
r555	PRPP[c] + AN[c] -> PPI[c] + NPRAN[c]	evm.model.scaffold00343.3	evm.model.scaffold00343.3	Anthranilate phosphoribosyltransferase	2.4.2.18	Phenylalanine, tyrosine and tryptophan biosynthesis (Aromatic amino acids)
r556	NPRAN[c] -> CPAD5P[c]	evm.model.scaffold00025.55	evm.model.scaffold00025.55	Phosphoribosylanthranilate isomerase	5.3.1.24	Phenylalanine, tyrosine and tryptophan biosynthesis (Aromatic amino acids)
r557	CPAD5P[c] -> CO2[c] + IGP[c]	evm.model.scaffold00025.55	evm.model.scaffold00025.55	Indole-3-glycerol-phosphate synthase	4.1.1.48	Phenylalanine, tyrosine and tryptophan biosynthesis (Aromatic amino acids)
r558	SER[c] + IGP[c] -> T3P1[c] + TRP[c]	evm.model.scaffold00209.19	evm.model.scaffold00209.19	Tryptophan synthase	4.2.1.20	Phenylalanine, tyrosine and tryptophan biosynthesis (Aromatic amino acids)
r559	O2[c] + TRP[c] -> FKYN[c]	evm.model.scaffold00105.24; evm.model.scaffold00001.1	evm.model.scaffold00105.24; evm.model.scaffold00001.1	Indoleamine 2,3-dioxygenase	1.13.11.52	Phenylalanine, tyrosine and tryptophan biosynthesis (Aromatic amino acids)
r560	FKYN[c] -> FOR[c] + KYN[c]	evm.model.scaffold00222.7	evm.model.scaffold00222.7	Arylformamidase	3.5.1.9	Phenylalanine, tyrosine and tryptophan biosynthesis (Aromatic amino acids)
r561	FKYN[e] -> FOR[e] + KYN[e]	evm.model.scaffold00222.7	evm.model.scaffold00222.7	Arylformamidase	3.5.1.9	Phenylalanine, tyrosine and tryptophan biosynthesis (Aromatic amino acids)
r562	NADPH[m] + O2[m] + KYN[m] -> H2O[m] + NADP[m] + HKYN[m]	evm.model.scaffold00210.21	evm.model.scaffold00210.21	Kynurenine 3-monooxygenase	1.14.13.9	Phenylalanine, tyrosine and tryptophan biosynthesis (Aromatic amino acids)
r563	KYN[c] -> ALA[c] + AN[c]	evm.model.scaffold00340.6	evm.model.scaffold00340.6	Kynureninase	3.7.1.3	Phenylalanine, tyrosine and tryptophan biosynthesis (Aromatic amino acids)
r564	HKYN[c] -> ALA[c] + HAN[c]	evm.model.scaffold00340.6	evm.model.scaffold00340.6	Kynureninase	3.7.1.3	Phenylalanine, tyrosine and tryptophan biosynthesis (Aromatic amino acids)
r565	O2[c] + HAN[c] -> CMUSA[c]	evm.model.scaffold00007.4	evm.model.scaffold00007.4	3-Hydroxyanthranilate 3,4-dioxygenase	1.13.11.6	Phenylalanine, tyrosine and tryptophan biosynthesis (Aromatic amino acids)
r566	CHOR[c] -> PHEN[c]	evm.model.scaffold00110.23; evm.model.scaffold00048.15	evm.model.scaffold00110.23; evm.model.scaffold00048.15	Chorismate mutase	5.4.99.5	Phenylalanine, tyrosine and tryptophan biosynthesis (Aromatic amino acids)
r567	NADP[c] + PHEN[c] -> CO2[c] + NADPH[c] + 4HPP[c]	evm.model.scaffold00001.37	evm.model.scaffold00001.37	Prephenate dehydrogenase	1.3.1.13	Phenylalanine, tyrosine and tryptophan biosynthesis (Aromatic amino acids)
r568	AKG[c] + TYR[c] <=> GLU[c] + 4HPP[c]	evm.model.scaffold00132.30	evm.model.scaffold00132.30	Aspartate transaminase	2.6.1.1	Phenylalanine, tyrosine and tryptophan biosynthesis (Aromatic amino acids)
r569	AKG[m] + TYR[m] <=> GLU[m] + 4HPP[m]	evm.model.scaffold00055.47	evm.model.scaffold00055.47	Aspartate transaminase	2.6.1.1	Phenylalanine, tyrosine and tryptophan biosynthesis (Aromatic amino acids)
r570	O2[c] + PHE[c] + TTHBOTR[c] -> TYR[c] + HYTTHBOTR[c]	evm.model.scaffold00040.7	evm.model.scaffold00040.7	Phenylalanine 4-monooxygenase	1.14.16.1	Phenylalanine, tyrosine and tryptophan biosynthesis (Aromatic amino acids)
r571	4HPP[c] <=> HYHYPREATE[c]	evm.model.scaffold00015.38	evm.model.scaffold00015.38	Phenylpyruvate tautomerase	5.3.2.1	Phenylalanine, tyrosine and tryptophan biosynthesis (Aromatic amino acids)
r572	O2[c] + 4HPP[c] -> CO2[c] + HOMOGEN[c]	evm.model.scaffold00067.17	evm.model.scaffold00067.17	4-hydroxyphenylpyruvate dioxygenase	1.13.11.27	Phenylalanine, tyrosine and tryptophan biosynthesis (Aromatic amino acids)
r573	O2[c] + HOMOGEN[c] -> MACAC[c]	evm.model.scaffold00071.38	evm.model.scaffold00071.38	Homogentisate 1,2-dioxygenase	1.13.11.5	Phenylalanine, tyrosine and tryptophan biosynthesis (Aromatic amino acids)
r574	O2[c] + GEN[c] -> MAYLPYR[c]	evm.model.scaffold00030.28; evm.model.scaffold00030.29	evm.model.scaffold00030.28; evm.model.scaffold00030.29	Gentisate 1,2-dioxygenase	1.13.11.4	Phenylalanine, tyrosine and tryptophan biosynthesis (Aromatic amino acids)
r575	MACAC[c] -> FUACAC[c]	evm.model.scaffold00027.60;evm.model.scaffold00125.32	evm.model.scaffold00027.60;evm.model.scaffold00125.32	Maleylacetoacetate isomerase	5.2.1.2	Phenylalanine, tyrosine and tryptophan biosynthesis (Aromatic amino acids)
r576	FUACAC[c] -> FUM[c] + ACTAC[c]	evm.model.scaffold00165.15	evm.model.scaffold00165.15	Fumarylacetoacetate hydrolase	3.7.1.2	Phenylalanine, tyrosine and tryptophan biosynthesis (Aromatic amino acids)
r577	H2O[c] + ACYLPYR[c] -> PYR[c] + FUM[c]	evm.model.scaffold00240.19	evm.model.scaffold00240.19	acylpyruvate hydrolase	3.7.1.5	Phenylalanine, tyrosine and tryptophan biosynthesis (Aromatic amino acids)
r578	H2O[m] + ACYLPYR[m] -> PYR[m] + FUM[m]	evm.model.scaffold00027.3	evm.model.scaffold00027.3	acylpyruvate hydrolase	3.7.1.5	Phenylalanine, tyrosine and tryptophan biosynthesis (Aromatic amino acids)
r579	2 H2O2[p] -> 2 H2O[p] + O2[p]	evm.model.scaffold00072.7;evm.model.scaffold00192.18;evm.model.scaffold00086.25	evm.model.scaffold00072.7;evm.model.scaffold00192.18;evm.model.scaffold00086.25	Catalase	1.11.1.6	Phenylalanine, tyrosine and tryptophan biosynthesis (Aromatic amino acids)
r580	2 H2O2[c] -> 2 H2O[c] + O2[c]	evm.model.scaffold00001.125;evm.model.scaffold00086.25	evm.model.scaffold00001.125;evm.model.scaffold00086.25	Catalase	1.11.1.6	Phenylalanine, tyrosine and tryptophan biosynthesis (Aromatic amino acids)
r581	AKA[c] -> CO2[c] + GLTCOA[c]	evm.model.scaffold00215.12;evm.model.scaffold00154.20;evm.model.scaffold00064.27	evm.model.scaffold00215.12;evm.model.scaffold00154.20;evm.model.scaffold00064.27	2-oxoglutarate dehydrogenase	1.2.4.2	Phenylalanine, tyrosine and tryptophan biosynthesis (Aromatic amino acids)
r582	AKA[m] -> CO2[m] + GLTCOA[m]	evm.model.scaffold00215.12;evm.model.scaffold00064.27	evm.model.scaffold00215.12;evm.model.scaffold00064.27	2-oxoglutarate dehydrogenase	1.2.4.2	Phenylalanine, tyrosine and tryptophan biosynthesis (Aromatic amino acids)
r583	O2[c] + ASPERMD[c] -> H2O2[c] + APRUT[c] + APROA[c]	evm.model.scaffold00160.5	evm.model.scaffold00160.5	Polyamine oxidase	1.5.3.11	Phenylalanine, tyrosine and tryptophan biosynthesis (Aromatic amino acids)
r584	O2[c] + APRUT[c] -> H2O2[c] + APROA[c] + GABAL[c]	evm.model.scaffold00160.5	evm.model.scaffold00160.5	Polyamine oxidase	1.5.3.11	Phenylalanine, tyrosine and tryptophan biosynthesis (Aromatic amino acids)
r585	AKG[c] + KYN[c] -> GLU[c] + APEBU[c]	evm.model.scaffold00008.50;evm.model.scaffold00018.14	evm.model.scaffold00008.50;evm.model.scaffold00018.14	Kynurenine aminotransferase	2.6.1.7	Phenylalanine, tyrosine and tryptophan biosynthesis (Aromatic amino acids)
r586	AKG[m] + KYN[m] -> GLU[m] + APEBU[m]	evm.model.scaffold00055.47	evm.model.scaffold00055.47	Kynurenine aminotransferase	2.6.1.7	Phenylalanine, tyrosine and tryptophan biosynthesis (Aromatic amino acids)
r587	ATP[m] + TRNA[m] + TYR[m] -> PPI[m] + AMP[m] + LTyrTRNA[m]	evm.model.scaffold00263.4	evm.model.scaffold00263.4	Tyrosyl-tRNA synthetase	6.1.1.1	Phenylalanine, tyrosine and tryptophan biosynthesis (Aromatic amino acids)
r588	ATP[c] + TRNA[c] + TYR[c] -> AMP[c] + PPI[c] + LTyrTRNA[c]	evm.model.scaffold00141.20	evm.model.scaffold00141.20	Tyrosyl-tRNA synthetase	6.1.1.1	Phenylalanine, tyrosine and tryptophan biosynthesis (Aromatic amino acids)
r589	ATP[m] + TRNA[m] + TRP[m] -> PPI[m] + AMP[m] + TRPTRNA[m]	evm.model.scaffold00073.40	evm.model.scaffold00073.40	Tryptophan-tRNA synthetase	6.1.1.2	Phenylalanine, tyrosine and tryptophan biosynthesis (Aromatic amino acids)
r590	ATP[c] + TRNA[c] + TRP[c] -> AMP[c] + PPI[c] + TRPTRNA[c]	evm.model.scaffold00073.40;evm.model.scaffold00186.11	evm.model.scaffold00073.40;evm.model.scaffold00186.11	Tryptophan-tRNA synthetase	6.1.1.2	Phenylalanine, tyrosine and tryptophan biosynthesis (Aromatic amino acids)
r591	ATP[c] + TRNA[c] + PHE[c] -> AMP[c] + PPI[c] + LPheTRNA[c]	evm.model.scaffold00064.12;evm.model.scaffold00280.5;evm.model.scaffold00190.6	evm.model.scaffold00064.12;evm.model.scaffold00280.5;evm.model.scaffold00190.6	Phenylalanyl-tRNA synthetase	6.1.1.20	Phenylalanine, tyrosine and tryptophan biosynthesis (Aromatic amino acids)
r592	4CMCOA[c] -> CAFFCOA[c]	evm.model.scaffold00102.27	evm.model.scaffold00102.27	Oxidoreductases	1.14.13.-	Phenylalanine, tyrosine and tryptophan biosynthesis (Aromatic amino acids)
r593	SAM[m] + CAFFCOA[m] -> SAH[m] + FERYLCOA[m]	evm.model.scaffold00046.15	evm.model.scaffold00046.15	Caffeoyl-CoA O-methyltransferase	2.1.1.104	Phenylalanine, tyrosine and tryptophan biosynthesis (Aromatic amino acids)
r594	ACCOA[c] + SERNIN[c] -> COA[c] + NSERNIN[c]	evm.model.scaffold00114.22	evm.model.scaffold00114.22	Aralkylamine N-acetyltransferase	2.3.1.87	Phenylalanine, tyrosine and tryptophan biosynthesis (Aromatic amino acids)
r595	PHEN[c] -> CO2[c] + PHPYR[c]	evm.model.scaffold00110.23	evm.model.scaffold00110.23	Prephenate dehydratase	4.2.1.51	Phenylalanine, tyrosine and tryptophan biosynthesis
r596	GLU[c] + PHPYR[c] <=> AKG[c] + PHE[c]	evm.model.scaffold00083.10	evm.model.scaffold00083.10	Aromatic-amino-acid transaminase	2.6.1.57	Phenylalanine, tyrosine and tryptophan biosynthesis
r597	GLU[m] + PHPYR[m] <=> AKG[m] + PHE[m]	evm.model.scaffold00083.10	evm.model.scaffold00083.10	Aromatic-amino-acid transaminase	2.6.1.57	Phenylalanine, tyrosine and tryptophan biosynthesis
r598	DHBZA + O2 -> MPYR	evm.model.scaffold00030.29	evm.model.scaffold00030.29	gentisate 1,2-dioxygenase	1.13.11.4	Tyrosine metabolism	Added reaction
r599	ACCOA[c] + PHOPTRIN[c] -> COA[c] + APHOPTRIN[c]	evm.model.scaffold00244.14	evm.model.scaffold00244.14	Phosphinothricin acetyltransferase	2.3.1.183	Phosphonate and phosphinate metabolism
r600	ATP[c] + R5P[c] <=> AMP[c] + PRPP[c]	evm.model.scaffold00023.42;evm.model.scaffold00008.56;evm.model.scaffold00021.21;evm.model.scaffold00102.29;evm.model.scaffold00108.18	evm.model.scaffold00023.42;evm.model.scaffold00008.56;evm.model.scaffold00021.21;evm.model.scaffold00102.29;evm.model.scaffold00108.18	Ribose-phosphate pyrophosphokinase	2.7.6.1	Purine Metabolism
r601	ATP[b] -> PPI[b] + cAMP[b]	evm.model.scaffold00084.10	evm.model.scaffold00084.10	Adenylate cyclase	4.6.1.1	Purine Metabolism
r602	ATP[c] -> PPI[c] + cAMP[c]	evm.model.scaffold00166.12;evm.model.scaffold00271.5	evm.model.scaffold00166.12;evm.model.scaffold00271.5	Adenylate cyclase	4.6.1.1	Purine Metabolism
r603	CAIR[c] <=> CO2[c] + AIR[c]	evm.model.scaffold00036.55;evm.model.scaffold00036.54	evm.model.scaffold00036.55;evm.model.scaffold00036.54	Phosphoribosyl-aminoimidazole carboxylase	4.1.1.21	Purine Metabolism
r604	ATP[c] + ASP[c] + CAIR[c] <=> ADP[c] + PI[c] + SAICAR[c]	evm.model.scaffold00017.2	evm.model.scaffold00017.2	Phosphoribosylaminoimidazole-succicarboxamide synthase	6.3.2.6	Purine Metabolism
r605	SAICAR[c] <=> FUM[c] + AICAR[c]	evm.model.scaffold00202.2	evm.model.scaffold00202.2	Adenylosuccinate lyase	4.3.2.2	Purine Metabolism
r606	ATP[c] + FGAM[c] -> ADP[c] + PI[c] + AIR[c]	evm.model.scaffold00106.17	evm.model.scaffold00106.17	Phosphoribosylformylglycinamidine cyclo-ligase	6.3.3.1	Purine Metabolism
r607	ATP[c] + GLY[c] + PRAM[c] <=> ADP[c] + PI[c] + GAR[c]	evm.model.scaffold00106.17	evm.model.scaffold00106.17	Phosphoribosylamine-glycine ligase	6.3.4.13	Purine Metabolism
r608	ATP[c] + GLN[c] + FGAR[c] -> ADP[c] + PI[c] + GLU[c] + FGAM[c]	evm.model.scaffold00071.15	evm.model.scaffold00071.15	Phosphoribosylformylglycinamidine synthase	6.3.5.3	Purine Metabolism
r609	GAR[c] + FTHF[c] -> THF[c] + FGAR[c]	evm.model.scaffold00260.1;evm.model.scaffold00106.17	evm.model.scaffold00260.1;evm.model.scaffold00106.17	5-phosphoribosylglycinamide formyltransferase	2.1.2.2	Purine Metabolism
r610	GLN[c] + PRPP[c] -> PPI[c] + GLU[c] + PRAM[c]	evm.model.scaffold00026.49;evm.model.scaffold00088.8	evm.model.scaffold00026.49;evm.model.scaffold00088.8	Amidophosphoribosyltransferase	2.4.2.14	Purine Metabolism
r611	AICAR[c] + FTHF[c] <=> THF[c] + PRFICA[c]	evm.model.scaffold00078.3	evm.model.scaffold00078.3	Phosphoribosylaminoimidazolecarboxamide formyltransferase	2.1.2.3	Purine Metabolism
r612	PRFICA[c] <=> IMP[c]	evm.model.scaffold00078.3	evm.model.scaffold00078.3	IMP cyclohydrolase	3.5.4.10	Purine Metabolism
r613	GTP[c] + ASP[c] + IMP[c] -> PI[c] + GDP[c] + ASUC[c]	evm.model.scaffold00289.5	evm.model.scaffold00289.5	Adenylosuccinate synthetase	6.3.4.4	Purine Metabolism
r614	ASUC[c] <=> FUM[c] + AMP[c]	evm.model.scaffold00202.2	evm.model.scaffold00202.2	Adenylosuccinate lyase	4.3.2.2	Purine Metabolism
r615	ATP[c] + GLN[c] + XMP[c] -> AMP[c] + PPI[c] + GLU[c] + GMP[c]	evm.model.scaffold00195.19	evm.model.scaffold00195.19	GMP synthase	6.3.5.2	Purine Metabolism
r616	ATP[c] + GMP[c] <=> ADP[c] + GDP[c]	evm.model.scaffold00073.32	evm.model.scaffold00073.32	Guanylate kinase	2.7.4.8	Purine Metabolism
r617	ATP[c] + DGMP[c] <=> ADP[c] + DGDP[c]	evm.model.scaffold00073.32	evm.model.scaffold00073.32	Guanylate kinase	2.7.4.8	Purine Metabolism
r618	GMP[c] + DATP[c] <=> GDP[c] + DADP[c]	evm.model.scaffold00073.32	evm.model.scaffold00073.32	Guanylate kinase	2.7.4.8	Purine Metabolism
r619	H2O[c] + AMP[c] -> NH3[c] + IMP[c]	evm.model.scaffold00147.5; evm.model.scaffold00287.12	evm.model.scaffold00147.5; evm.model.scaffold00287.12	AMP deaminase	3.5.4.6	Purine Metabolism
r620	H2O[c] + cGMP[c] -> GMP[c]	evm.model.scaffold00118.34	evm.model.scaffold00118.34	3',5'-cyclic-nucleotide phosphodiesterase	3.1.4.17	Purine Metabolism
r621	H2O[b] + cGMP[b] -> GMP[b]	evm.model.scaffold00067.25	evm.model.scaffold00067.25	3',5'-cyclic-nucleotide phosphodiesterase	3.1.4.17	Purine Metabolism
r622	H2O[c] + cAMP[c] -> AMP[c]	evm.model.scaffold00118.34	evm.model.scaffold00118.34	3',5'-cyclic-nucleotide phosphodiesterase	3.1.4.17	Purine Metabolism
r623	H2O[b] + cAMP[b] -> AMP[b]	evm.model.scaffold00067.25	evm.model.scaffold00067.25	3',5'-cyclic-nucleotide phosphodiesterase	3.1.4.17	Purine Metabolism
r624	H2O[c] + ADPRIB[c] -> AMP[c] + R5P[c]	evm.model.scaffold00037.8	evm.model.scaffold00037.8	ADP-ribose diphosphatase	3.6.1.13	Purine Metabolism
r625	H2O[c] + GN[c] -> NH3[c] + XAN[c]	evm.model.scaffold00021.5	evm.model.scaffold00021.5	Guanine deaminase	3.5.4.3	Purine Metabolism
r626	H2O[e] + GN[e] -> NH3[e] + XAN[e]	evm.model.scaffold00237.3	evm.model.scaffold00237.3	Guanine deaminase	3.5.4.3	Purine Metabolism
r627	H2O[p] + O2[p] + URATE[p] -> H2O2[p] + HIURTE[p]	evm.model.scaffold00153.9	evm.model.scaffold00153.9	Urate oxidase	1.7.3.3	Purine Metabolism
r628	H2O[b] + HIURTE[b] -> ATN[b] + CO2[b]	evm.model.scaffold00254.11	evm.model.scaffold00254.11	Hydroxyisourate hydrolase	3.5.2.17	Purine Metabolism
r629	H2O[e] + HIURTE[e] -> ATN[e] + CO2[e]	evm.model.scaffold00254.11	evm.model.scaffold00254.11	Hydroxyisourate hydrolase	3.5.2.17	Purine Metabolism
r630	NAD[c] + IMP[c] -> NADH[c] + XMP[c]	evm.model.scaffold00155.21; evm.model.scaffold00038.14	evm.model.scaffold00155.21; evm.model.scaffold00038.14	IMP dehydrogenase	1.1.1.205	Purine Metabolism
r631	NAD[m] + IMP[m] -> NADH[m] + XMP[m]	evm.model.scaffold00155.21; evm.model.scaffold00038.14	evm.model.scaffold00155.21; evm.model.scaffold00038.14	IMP dehydrogenase	1.1.1.205	Purine Metabolism
r632	H2O[c] + ITP[c] -> PPI[c] + IMP[c]	evm.model.scaffold00255.7	evm.model.scaffold00255.7	Inosine triphosphate pyrophosphatase	3.6.1.19	Purine Metabolism
r633	H2O[c] + DITP[c] -> PPI[c] + DIMP[c]	evm.model.scaffold00255.7	evm.model.scaffold00255.7	Inosine triphosphate pyrophosphatase	3.6.1.19	Purine Metabolism
r634	H2O[c] + GTP[c] -> PPI[c] + GMP[c]	evm.model.scaffold00255.7	evm.model.scaffold00255.7	Inosine triphosphate pyrophosphatase	3.6.1.19	Purine Metabolism
r635	H2O[c] + DGTP[c] -> PPI[c] + DGMP[c]	evm.model.scaffold00255.7	evm.model.scaffold00255.7	Inosine triphosphate pyrophosphatase	3.6.1.19	Purine Metabolism
r636	H2O[c] + XTP[c] -> PPI[c] + XMP[c]	evm.model.scaffold00255.7	evm.model.scaffold00255.7	Inosine triphosphate pyrophosphatase	3.6.1.19	Purine Metabolism
r637	ATP[c] + SLF[c] -> PPI[c] + APS[c]	evm.model.scaffold00130.16	evm.model.scaffold00130.16	Sulfate adenylyltransferase	2.7.7.4	Purine Metabolism
r638	ATP[m] + SLF[m] -> PPI[m] + APS[m]	evm.model.scaffold00130.16	evm.model.scaffold00130.16	Sulfate adenylyltransferase	2.7.7.4	Purine Metabolism
r639	ATP[c] + APS[c] -> ADP[c] + PAPS[c]	evm.model.scaffold00035.43;evm.model.scaffold00130.16	evm.model.scaffold00035.43;evm.model.scaffold00130.16	Adenylylsulfate kinase	2.7.1.25	Purine Metabolism
r640	H2O[c] + PAPS[c] -> SLF[c] + PAYL[c]	evm.model.scaffold00006.33	evm.model.scaffold00006.33	Nucleotide diphosphatase	3.6.1.9	Purine Metabolism
r641	ADP[c] + ATP[c] -> APPPPA[c] + PI[c]	evm.model.scaffold00072.27	evm.model.scaffold00072.27	ATP adenylyltransferase	2.7.7.53	Purine Metabolism
r642	H2O[c] + APPPPA[c] -> ATP[c] + AMP[c]	Gap	Gap	bis(5'-nucleosidyl)-tetraphosphatase	3.6.1.17	Purine Metabolism
r643	H2O[c] + APPPA[c] -> ADP[c] + AMP[c]	evm.model.scaffold00241.10	evm.model.scaffold00241.10	bis(5'-adenosyl)-triphosphatase	3.6.1.29	Purine Metabolism
r644	UGC[e] <=> GLX[e]+ UREA[e]	evm.model.scaffold00191.5	evm.model.scaffold00191.5	Ureidoglycolate lyase	4.3.2.3	Purine Metabolism	Updated reaction
r645	UGC[c] <=> GLX[c]+ UREA[c]	evm.model.scaffold00191.5	evm.model.scaffold00191.5	Ureidoglycolate lyase	4.3.2.3	Purine Metabolism	Updated reaction
r646	ASP[c] + CAP[c] -> PI[c] + CAASP[c]	evm.model.scaffold00025.9;evm.model.scaffold00220.5	evm.model.scaffold00025.9;evm.model.scaffold00220.5	Aspartate-carbamoyltransferase	2.1.3.2	Pyrimidine metabolism
r647	CAASP[c] <=> DOROA[c]	evm.model.scaffold00252.15;evm.model.scaffold00220.5;evm.model.scaffold00025.9	evm.model.scaffold00252.15;evm.model.scaffold00220.5;evm.model.scaffold00025.9	Dihydroorotase	3.5.2.3	Pyrimidine metabolism
r648	O2[c] + DOROA[c] <=> H2O2[c] + OROA[c]	evm.model.scaffold00255.10	evm.model.scaffold00255.10	Dihydroorotate oxidase	1.3.3.1	Pyrimidine metabolism
r649	PRPP[c] + OROA[c] <=> PPI[c] + OMP[c]	evm.model.scaffold00024.47;evm.model.scaffold00039.48	evm.model.scaffold00024.47;evm.model.scaffold00039.48	Orotate phosphoribosyltransferase	2.4.2.10	Pyrimidine metabolism
r650	OMP[c] -> CO2[c] + UMP[c]	evm.model.scaffold00039.48	evm.model.scaffold00039.48	Orotidine 5-phosphate decarboxylase	4.1.1.23	Pyrimidine metabolism
r651	PRPP[c] + URA[c] -> PPI[c] + UMP[c]	evm.model.scaffold00122.7; evm.model.scaffold00033.21	evm.model.scaffold00122.7; evm.model.scaffold00033.21	Uracil phosphoribosyltransferase	2.4.2.9	Pyrimidine metabolism
r652	GTP[c] + URI[c] <=> GDP[c] + UMP[c]	evm.model.scaffold00123.33; evm.model.scaffold00013.35	evm.model.scaffold00123.33; evm.model.scaffold00013.35	Uridine kinase	2.7.1.48	Pyrimidine metabolism
r653	GTP[b] + URI[b] <=> GDP[b] + UMP[b]	evm.model.scaffold00398.4	evm.model.scaffold00398.4	Uridine kinase	2.7.1.48	Pyrimidine metabolism
r654	GTP[m] + URI[m] <=> GDP[m] + UMP[m]	evm.model.scaffold00398.4	evm.model.scaffold00398.4	Uridine kinase	2.7.1.48	Pyrimidine metabolism
r655	GTP[c] + CYTD[c] -> GDP[c] + CMP[c]	evm.model.scaffold00123.33; evm.model.scaffold00013.35	evm.model.scaffold00123.33; evm.model.scaffold00013.35	Uridine kinase	2.7.1.48	Pyrimidine metabolism
r656	GTP[b] + CYTD[b] -> GDP[b] + CMP[b]	evm.model.scaffold00398.4	evm.model.scaffold00398.4	Uridine kinase	2.7.1.48	Pyrimidine metabolism
r657	GTP[m] + CYTD[m] -> GDP[m] + CMP[m]	evm.model.scaffold00398.4	evm.model.scaffold00398.4	Uridine kinase	2.7.1.48	Pyrimidine metabolism
r658	ATP[c] + URI[c] -> ADP[c] + UMP[c]	evm.model.scaffold00123.33; evm.model.scaffold00013.35; evm.model.scaffold00392.2	evm.model.scaffold00123.33; evm.model.scaffold00013.35; evm.model.scaffold00392.2	Uridine kinase	2.7.1.48	Pyrimidine metabolism
r659	ATP[b] + URI[b] -> ADP[b] + UMP[b]	evm.model.scaffold00398.4	evm.model.scaffold00398.4	Uridine kinase	2.7.1.48	Pyrimidine metabolism
r660	ATP[m] + URI[m] -> ADP[m] + UMP[m]	evm.model.scaffold00398.4	evm.model.scaffold00398.4	Uridine kinase	2.7.1.48	Pyrimidine metabolism
r661	H2O[e] + CYTD[e] -> NH3[e] + URI[e]	evm.model.scaffold00121.11	evm.model.scaffold00121.11	Cytidine deaminase	3.5.4.5	Pyrimidine metabolism
r662	DC[e] -> NH3[e] + DU[e]	evm.model.scaffold00121.11	evm.model.scaffold00121.11	Cytidine deaminase	3.5.4.5	Pyrimidine metabolism
r663	H2O[c] + DUTP[c] -> PPI[c] + DUMP[c]	evm.model.scaffold00101.2	evm.model.scaffold00101.2	dUTPase	3.6.1.23	Pyrimidine metabolism
r664	H2O[m] + DUTP[m] -> PPI[m] + DUMP[m]	evm.model.scaffold00101.2	evm.model.scaffold00101.2	dUTPase	3.6.1.23	Pyrimidine metabolism
r665	METTHF[c] + DUMP[c] -> DHF[c] + DTMP[c]	evm.model.scaffold00026.33	evm.model.scaffold00026.33	Thymidylate synthase	2.1.1.45	Pyrimidine metabolism
r666	ATP[c] + UTP[c] + GLN[c] -> ADP[c] + PI[c] + GLU[c] + CTP[c]	evm.model.scaffold00043.8;evm.model.scaffold00024.21	evm.model.scaffold00043.8;evm.model.scaffold00024.21	CTP synthase	6.3.4.2	Pyrimidine metabolism
r667	R5P[c] + URA[c] <=> PURI5P[c]	evm.model.scaffold00173.5;evm.model.scaffold00139.23	evm.model.scaffold00173.5;evm.model.scaffold00139.23	Pseudouridylate synthase	4.2.1.70	Pyrimidine metabolism
r668	H2O[c] + DCMP[c] -> NH3[c] + DUMP[c]	evm.model.scaffold00225.14	evm.model.scaffold00225.14	Deoxycytidylate deaminase	3.5.4.12	Pyrimidine metabolism
r669	2 ATP[c] + HCO3[c] + GLN[c] -> 2 ADP[c] + PI[c] + GLU[c] + CAP[c]	evm.model.scaffold00088.36;evm.model.scaffold00220.5	evm.model.scaffold00088.36;evm.model.scaffold00220.5	Carbamoyl-phosphate synthase (glutamine-hydrolysing)	6.3.5.5	Pyrimidine metabolism
r670	2 ATP[e] + HCO3[e] + GLN[e] -> 2 ADP[e] + PI[e] + GLU[e] + CAP[e]	evm.model.scaffold00025.9;evm.model.scaffold00110.7	evm.model.scaffold00025.9;evm.model.scaffold00110.7	Carbamoyl-phosphate synthase (glutamine-hydrolysing)	6.3.5.5	Pyrimidine metabolism
r671	2 ATP[m] + HCO3[m] + GLN[m] -> 2 ADP[m] + PI[m] + GLU[m] + CAP[m]	evm.model.scaffold00110.7	evm.model.scaffold00110.7	Carbamoyl-phosphate synthase (glutamine-hydrolysing)	6.3.5.5	Pyrimidine metabolism
r672	H2O[c] + CYTS[c] -> NH3[c] + URA[c]	evm.model.scaffold00022.54	evm.model.scaffold00022.54	Cytosine deaminase	3.5.4.1	Pyrimidine metabolism
r673	H2O[m] + CYTS[m] -> NH3[m] + URA[m]	evm.model.scaffold00022.54	evm.model.scaffold00022.54	Cytosine deaminase	3.5.4.1	Pyrimidine metabolism
r674	NADPH[c] + OTHIO[c] -> NADP[c] + RTHIO[c]	evm.model.scaffold00286.7;evm.model.scaffold00140.10	evm.model.scaffold00286.7;evm.model.scaffold00140.10	Thioredoxin reductase	1.8.1.9	Pyrimidine metabolism
r675	URI[c] + PI[c] <=> R1P[c] + URA[c]	evm.model.scaffold00078.12	evm.model.scaffold00078.12	Uridine phosphorylase	2.4.2.3	Pyrimidine metabolism
r676	DOROA[c] + FUM[c] <=> SUCC[c] + OROA[c]	evm.model.scaffold00255.10	evm.model.scaffold00255.10	Dihydroorotate dehydrogenase (fumarate)	1.3.98.1	Pyrimidine metabolism
r677	PRPP[c] + AD[c] -> AMP[c] + PPI[c]	evm.model.scaffold00187.16	evm.model.scaffold00187.16	Adenine phosphoribosyltransferase	2.4.2.7	Nucleotide salvage pathway
r678	DIN[c] + PI[c] <=> HYXN[c] + DR1P[c]	evm.model.scaffold00255.12	evm.model.scaffold00255.12	purine-nucleoside phosphorylase	2.4.2.1	Nucleotide salvage pathway
r679	DA[c] + PI[c] <=> AD[c] + DR1P[c]	evm.model.scaffold00255.12	evm.model.scaffold00255.12	purine-nucleoside phosphorylase	2.4.2.1	Nucleotide salvage pathway
r680	DG[c] + PI[c] <=> GN[c] + DR1P[c]	evm.model.scaffold00255.12	evm.model.scaffold00255.12	purine-nucleoside phosphorylase	2.4.2.1	Nucleotide salvage pathway
r681	R1P[c] + HYXN[c] <=> PI[c] + INS[c]	evm.model.scaffold00255.12	evm.model.scaffold00255.12	purine-nucleoside phosphorylase	2.4.2.1	Nucleotide salvage pathway
r682	R1P[c] + AD[c] <=> PI[c] + ADN[c]	evm.model.scaffold00255.12	evm.model.scaffold00255.12	purine-nucleoside phosphorylase	2.4.2.1	Nucleotide salvage pathway
r683	R1P[c] + XAN[c] <=> PI[c] + XTSINE[c]	evm.model.scaffold00255.12	evm.model.scaffold00255.12	purine-nucleoside phosphorylase	2.4.2.1	Nucleotide salvage pathway
r684	PI[c] + GSN[c] <=> R1P[c] + GN[c]	evm.model.scaffold00255.12	evm.model.scaffold00255.12	purine-nucleoside phosphorylase	2.4.2.1	Nucleotide salvage pathway
r685	ATP[c] + ADN[c] -> ADP[c] + AMP[c]	evm.model.scaffold00228.4	evm.model.scaffold00228.4	Adenosine kinase	2.7.1.20	Nucleotide salvage pathway
r686	ATP[c] + AMP[c] <=> 2 ADP[c]	evm.model.scaffold00017.41; evm.model.scaffold00104.20	evm.model.scaffold00017.41; evm.model.scaffold00104.20	Adenylate kinase	2.7.4.3	Nucleotide salvage pathway
r687	ATP[m] + AMP[m] <=> 2 ADP[m]	evm.model.scaffold00094.17	evm.model.scaffold00094.17	Adenylate kinase	2.7.4.3	Nucleotide salvage pathway
r688	DATP[c] + DAMP[c] <=> 2 DADP[c]	evm.model.scaffold00017.41; evm.model.scaffold00104.20	evm.model.scaffold00017.41; evm.model.scaffold00104.20	Adenylate kinase	2.7.4.3	Nucleotide salvage pathway
r689	DATP[m] + DAMP[m] <=> 2 DADP[m]	evm.model.scaffold00094.17	evm.model.scaffold00094.17	Adenylate kinase	2.7.4.3	Nucleotide salvage pathway
r690	ATP[c] + DGDP[c] <=> ADP[c] + DGTP[c]	evm.model.scaffold00303.5	evm.model.scaffold00303.5	Nucleoside diphosphate kinase	2.7.4.6	Nucleotide salvage pathway
r691	ATP[m] + DGDP[m] <=> ADP[m] + DGTP[m]	evm.model.scaffold00303.5	evm.model.scaffold00303.5	Nucleoside diphosphate kinase	2.7.4.6	Nucleotide salvage pathway
r692	ATP[c] + DUDP[c] <=> ADP[c] + DUTP[c]	evm.model.scaffold00303.5	evm.model.scaffold00303.5	Nucleoside diphosphate kinase	2.7.4.6	Nucleotide salvage pathway
r693	ATP[m] + DUDP[m] <=> ADP[m] + DUTP[m]	evm.model.scaffold00303.5	evm.model.scaffold00303.5	Nucleoside diphosphate kinase	2.7.4.6	Nucleotide salvage pathway
r694	ATP[c] + DCDP[c] <=> ADP[c] + DCTP[c]	evm.model.scaffold00303.5	evm.model.scaffold00303.5	Nucleoside diphosphate kinase	2.7.4.6	Nucleotide salvage pathway
r695	ATP[m] + DCDP[m] <=> ADP[m] + DCTP[m]	evm.model.scaffold00303.5	evm.model.scaffold00303.5	Nucleoside diphosphate kinase	2.7.4.6	Nucleotide salvage pathway
r696	ATP[c] + DTDP[c] <=> ADP[c] + DTTP[c]	evm.model.scaffold00303.5	evm.model.scaffold00303.5	Nucleoside diphosphate kinase	2.7.4.6	Nucleotide salvage pathway
r697	ATP[m] + DTDP[m] <=> ADP[m] + DTTP[m]	evm.model.scaffold00303.5	evm.model.scaffold00303.5	Nucleoside diphosphate kinase	2.7.4.6	Nucleotide salvage pathway
r698	ATP[c] + DADP[c] <=> ADP[c] + DATP[c]	evm.model.scaffold00303.5	evm.model.scaffold00303.5	Nucleoside diphosphate kinase	2.7.4.6	Nucleotide salvage pathway
r699	ATP[m] + DADP[m] <=> ADP[m] + DATP[m]	evm.model.scaffold00303.5	evm.model.scaffold00303.5	Nucleoside diphosphate kinase	2.7.4.6	Nucleotide salvage pathway
r700	ATP[c] + UDP[c] <=> ADP[c] + UTP[c]	evm.model.scaffold00303.5	evm.model.scaffold00303.5	Nucleoside diphosphate kinase	2.7.4.6	Nucleotide salvage pathway
r701	ATP[m] + UDP[m] <=> ADP[m] + UTP[m]	evm.model.scaffold00303.5	evm.model.scaffold00303.5	Nucleoside diphosphate kinase	2.7.4.6	Nucleotide salvage pathway
r702	ATP[c] + CDP[c] <=> ADP[c] + CTP[c]	evm.model.scaffold00303.5	evm.model.scaffold00303.5	Nucleoside diphosphate kinase	2.7.4.6	Nucleotide salvage pathway
r703	ATP[m] + CDP[m] <=> ADP[m] + CTP[m]	evm.model.scaffold00303.5	evm.model.scaffold00303.5	Nucleoside diphosphate kinase	2.7.4.6	Nucleotide salvage pathway
r704	ATP[c] + GDP[c] <=> ADP[c] + GTP[c]	evm.model.scaffold00303.5	evm.model.scaffold00303.5	Nucleoside diphosphate kinase	2.7.4.6	Nucleotide salvage pathway
r705	GDP[m] + ATP[m] <=> GTP[m] + ADP[m]	evm.model.scaffold00303.5	evm.model.scaffold00303.5	Nucleoside diphosphate kinase	2.7.4.6	Nucleotide salvage pathway
r706	ATP[c] + IDP[c] <=> ADP[c] + ITP[c]	evm.model.scaffold00306.1;evm.model.scaffold00025.36;evm.model.scaffold00113.27;evm.model.scaffold00037.19	evm.model.scaffold00306.1;evm.model.scaffold00025.36;evm.model.scaffold00113.27;evm.model.scaffold00037.19	Nucleoside diphosphate kinase	2.7.4.6	Nucleotide salvage pathway
r707	ATP[m] + IDP[m] <=> ADP[m] + ITP[m]	evm.model.scaffold00303.5;evm.model.scaffold00242.12	evm.model.scaffold00303.5;evm.model.scaffold00242.12	Nucleoside diphosphate kinase	2.7.4.6	Nucleotide salvage pathway
r708	PRPP[c] + HYXN[c] -> PPI[c] + IMP[c]	evm.model.scaffold00007.9	evm.model.scaffold00007.9	Xanthine-guanine phosphoribosyltransferase	2.4.2.8	Nucleotide salvage pathway
r709	PRPP[c] + GN[c] -> PPI[c] + GMP[c]	evm.model.scaffold00011.32	evm.model.scaffold00011.32	Xanthine-guanine phosphoribosyltransferase	2.4.2.8	Nucleotide salvage pathway
r710	DUMP[c] -> PI[c] + DU[c]	evm.model.scaffold00112.20	evm.model.scaffold00112.20	5-nucleotidase	3.1.3.5	Nucleotide salvage pathway
r711	DTMP[c] -> PI[c] + DT[c]	evm.model.scaffold00112.20	evm.model.scaffold00112.20	5-nucleotidase	3.1.3.5	Nucleotide salvage pathway
r712	DAMP[c] -> PI[c] + DA[c]	evm.model.scaffold00112.20	evm.model.scaffold00112.20	5-nucleotidase	3.1.3.5	Nucleotide salvage pathway
r713	DGMP[c] -> PI[c] + DG[c]	evm.model.scaffold00112.20	evm.model.scaffold00112.20	5-nucleotidase	3.1.3.5	Nucleotide salvage pathway
r714	DCMP[c] -> PI[c] + DC[c]	evm.model.scaffold00112.20	evm.model.scaffold00112.20	5-nucleotidase	3.1.3.5	Nucleotide salvage pathway
r715	CMP[c] -> PI[c] + CYTD[c]	evm.model.scaffold00112.20	evm.model.scaffold00112.20	5-nucleotidase	3.1.3.5	Nucleotide salvage pathway
r716	AMP[c] -> PI[c] + ADN[c]	evm.model.scaffold00112.20	evm.model.scaffold00112.20	5-nucleotidase	3.1.3.5	Nucleotide salvage pathway
r717	GMP[c] -> PI[c] + GSN[c]	evm.model.scaffold00112.20	evm.model.scaffold00112.20	5-nucleotidase	3.1.3.5	Nucleotide salvage pathway
r718	IMP[c] -> PI[c] + INS[c]	evm.model.scaffold00112.20	evm.model.scaffold00112.20	5-nucleotidase	3.1.3.5	Nucleotide salvage pathway
r719	XMP[c] -> PI[c] + XTSINE[c]	evm.model.scaffold00112.20	evm.model.scaffold00112.20	5-nucleotidase	3.1.3.5	Nucleotide salvage pathway
r720	UMP[c] -> PI[c] + URI[c]	evm.model.scaffold00112.20	evm.model.scaffold00112.20	5-nucleotidase	3.1.3.5	Nucleotide salvage pathway
r721	DUMP[c] -> DU[c] + PI[c]	evm.model.scaffold00175.4	evm.model.scaffold00175.4	5-nucleotidase	3.1.3.5	Nucleotide salvage pathway
r722	DUMP[e] -> DU[e] + PI[e]	evm.model.scaffold00175.4	evm.model.scaffold00175.4	5-nucleotidase	3.1.3.5	Nucleotide salvage pathway
r723	ADP[c] + RTHIO[c] -> OTHIO[c] + DADP[c]	evm.model.scaffold00015.11	evm.model.scaffold00015.11	Ribonucleoside-diphosphate reductase	1.17.4.1	Nucleotide salvage pathway
r724	GDP[c] + RTHIO[c] -> OTHIO[c] + DGDP[c]	evm.model.scaffold00015.11	evm.model.scaffold00015.11	Ribonucleoside-diphosphate reductase	1.17.4.1	Nucleotide salvage pathway
r725	CDP[c] + RTHIO[c] -> OTHIO[c] + DCDP[c]	evm.model.scaffold00015.11	evm.model.scaffold00015.11	Ribonucleoside-diphosphate reductase	1.17.4.1	Nucleotide salvage pathway
r726	UDP[c] + RTHIO[c] -> OTHIO[c] + DUDP[c]	evm.model.scaffold00015.11;evm.model.scaffold00078.46;evm.model.scaffold00019.61;evm.model.scaffold00067.31;evm.model.scaffold00090.17;evm.model.scaffold00090.18;evm.model.scaffold00178.20	evm.model.scaffold00015.11;evm.model.scaffold00078.46;evm.model.scaffold00019.61;evm.model.scaffold00067.31;evm.model.scaffold00090.17;evm.model.scaffold00090.18;evm.model.scaffold00178.20	Ribonucleoside-diphosphate reductase	1.17.4.1	Nucleotide salvage pathway
r727	ATP[c] + DTMP[c] <=> ADP[c] + DTDP[c]	evm.model.scaffold00214.12	evm.model.scaffold00214.12	Thymidylate kinase	2.7.4.9	Nucleotide salvage pathway
r728	DTMP[b] + ATP[b] <=> ADP[b] + DTDP[b]	evm.model.scaffold00001.114	evm.model.scaffold00001.114	Thymidylate kinase	2.7.4.9	Nucleotide salvage pathway
r729	ATP[c] + DCMP[c] <=> ADP[c] + DCDP[c]	evm.model.scaffold00025.36	evm.model.scaffold00025.36	UMP/CMP kinase	2.7.4.14	Nucleotide salvage pathway
r730	ATP[m] + DCMP[m] <=> ADP[m] + DCDP[m]	evm.model.scaffold00191.8	evm.model.scaffold00191.8	UMP/CMP kinase	2.7.4.14	Nucleotide salvage pathway
r731	ATP[c] + CMP[c] <=> ADP[c] + CDP[c]	evm.model.scaffold00025.36; evm.model.scaffold00113.27	evm.model.scaffold00025.36; evm.model.scaffold00113.27	UMP/CMP kinase	2.7.4.14	Nucleotide salvage pathway
r732	ATP[m] + CMP[m] <=> ADP[m] + CDP[m]	evm.model.scaffold00191.8	evm.model.scaffold00191.8	UMP/CMP kinase	2.7.4.14	Nucleotide salvage pathway
r733	ATP[c] + UMP[c] <=> ADP[c] + UDP[c]	evm.model.scaffold00025.36; evm.model.scaffold00113.27	evm.model.scaffold00025.36; evm.model.scaffold00113.27	UMP/CMP kinase	2.7.4.14	Nucleotide salvage pathway
r734	ATP[m] + UMP[m] <=> ADP[m] + UDP[m]	evm.model.scaffold00191.8	evm.model.scaffold00191.8	UMP/CMP kinase	2.7.4.14	Nucleotide salvage pathway
r735	H2O[c] + GDP[c] -> PI[c] + GMP[c]	evm.model.scaffold00055.4;evm.model.scaffold00183.22;evm.model.scaffold00776.1;evm.model.scaffold00145.20	evm.model.scaffold00055.4;evm.model.scaffold00183.22;evm.model.scaffold00776.1;evm.model.scaffold00145.20	Guanosine-diphosphatase	3.6.1.42	Nucleotide salvage pathway
r736	ATP[c] + 2 H2O[c] -> 2 PI[c] + AMP[c]	evm.model.scaffold00183.8;evm.model.scaffold00213.20	evm.model.scaffold00183.8;evm.model.scaffold00213.20	Apyrase	3.6.1.5	Nucleotide salvage pathway
r737	COA[c] + H3MCOA[c] <=> ACCOA[c] + AACCOA[c]	evm.model.scaffold00204.8	evm.model.scaffold00204.8	Hydroxymethylglutaryl CoA synthase	2.3.3.10	Biosynthesis of lanosterol
r738	COA[m] + H3MCOA[m] <=> ACCOA[m] + AACCOA[m]	evm.model.scaffold00204.8	evm.model.scaffold00204.8	Hydroxymethylglutaryl CoA synthase	2.3.3.10	Biosynthesis of lanosterol
r739	2 NADP[c] + COA[c] + MVL[c] <=> 2 NADPH[c] + H3MCOA[c]	evm.model.scaffold00146.2; evm.model.scaffold00247.2;evm.model.scaffold00042.46	evm.model.scaffold00146.2; evm.model.scaffold00247.2;evm.model.scaffold00042.46	Hydroxymethylglutaryl CoA reductase	1.1.1.34	Biosynthesis of lanosterol
r740	ATP[c] + MVL[c] -> ADP[c] + PMVL[c]	evm.model.scaffold00046.10	evm.model.scaffold00046.10	Mevalonate kinase (ATP)	2.7.1.36	Biosynthesis of lanosterol
r741	CTP[c] + MVL[c] -> CDP[c] + PMVL[c]	evm.model.scaffold00046.10	evm.model.scaffold00046.10	Mevalonate kinase (CTP)	2.7.1.36	Biosynthesis of lanosterol
r742	GTP[c] + MVL[c] -> GDP[c] + PMVL[c]	evm.model.scaffold00046.10	evm.model.scaffold00046.10	Mevalonate kinase (GTP)	2.7.1.36	Biosynthesis of lanosterol
r743	UTP[c] + MVL[c] -> UDP[c] + PMVL[c]	evm.model.scaffold00046.10	evm.model.scaffold00046.10	Mevalonate kinase (UTP)	2.7.1.36	Biosynthesis of lanosterol
r744	ATP[c] + PMVL[c] -> ADP[c] + PPMVL[c]	evm.model.scaffold00144.2	evm.model.scaffold00144.2	Phosphomevalonate kinase	2.7.4.2	Biosynthesis of lanosterol
r745	ATP[c] + PPMVL[c] -> ADP[c] + PI[c] + CO2[c] + IPPP[c]	evm.model.scaffold00019.19	evm.model.scaffold00019.19	Mevalonate pyrophoshate decarboxylase	4.1.1.33	Biosynthesis of lanosterol
r746	IPPP[c] <=> DMPP[c]	evm.model.scaffold00327.1	evm.model.scaffold00327.1	Isopentenyl-diphosphate D-isomerase	5.3.3.2	Biosynthesis of lanosterol
r747	IPPP[c] + DMPP[c] -> PPI[c] + GPP[c]	evm.model.scaffold00212.2;evm.model.scaffold00234.2;evm.model.scaffold00277.10	evm.model.scaffold00212.2;evm.model.scaffold00234.2;evm.model.scaffold00277.10	Dimethylallyltranstransferase	2.5.1.1	Biosynthesis of lanosterol
r748	IPPP[c] + GPP[c] -> PPI[c] + FPP[c]	evm.model.scaffold00212.2;evm.model.scaffold00234.2;evm.model.scaffold00277.10	evm.model.scaffold00212.2;evm.model.scaffold00234.2;evm.model.scaffold00277.10	Farnesyl-diphosphate synthase	2.5.1.10	Biosynthesis of lanosterol
r749	IPPP[c] + FPP[c] -> PPI[c] + GGPP[c]	evm.model.scaffold00234.2;evm.model.scaffold00277.10	evm.model.scaffold00234.2;evm.model.scaffold00277.10	Geranylgeranylpyrophosphate synthetase	2.5.1.29	Biosynthesis of lanosterol
r750	NADPH[c] + 2 FPP[c] -> NADP[c] + 2 PPI[c] + SQL[c]	evm.model.scaffold00368.3	evm.model.scaffold00368.3	Squalene synthase	2.5.1.21	Biosynthesis of lanosterol
r751	O2[b] + SQL[b] + NADPH[b] -> S23E[b] + NADP[b]	evm.model.scaffold00102.16	evm.model.scaffold00102.16	Squalene mooxygenase	1.14.13.132	Biosynthesis of lanosterol
r752	O2[c] + SQL[c] + NADPH[c] -> S23E[c] + NADP[c]	evm.model.scaffold00080.19	evm.model.scaffold00080.19	Squalene mooxygenase	1.14.13.132	Biosynthesis of lanosterol
r753	S23E[c] -> LNST[c]	evm.model.scaffold00172.12	evm.model.scaffold00172.12	Lanosterol synthase	5.4.99.7	Biosynthesis of lanosterol
r754	3 NADPH[c] + 3 O2[c] + LNST[c] -> 4 H2O[c] + 3 NADP[c] + FOR[c] + 44MACHL[c]	evm.model.scaffold00020.44; evm.model.scaffold00214.7	evm.model.scaffold00020.44; evm.model.scaffold00214.7	Sterol 14alpha-demethylase	1.14.14.154	Biosynthesis of zymosterol
r755	NADPH[c] + 44MACHL[c] -> NADP[c] + 14MLNST[c]	evm.model.scaffold00208.8;evm.model.scaffold00016.53	evm.model.scaffold00208.8;evm.model.scaffold00016.53	C-14 sterol reductase	1.3.1.70	Biosynthesis of zymosterol
r756	3 NADPH[c] + 3 O2[c] + 14MLNST[c] -> 3 NADP[c] + ICZYMST[c]	evm.model.scaffold00154.2;evm.model.scaffold00097.2	evm.model.scaffold00154.2;evm.model.scaffold00097.2	C-4 methyl sterol oxidase	1.14.13.72	Biosynthesis of zymosterol
r757	NADP[c] + ICZYMST[c] -> CO2[c] + NADPH[c] + IIZYMST[c]	evm.model.scaffold00333.3	evm.model.scaffold00333.3	C-3 sterol dehydrogenase	1.1.1.170	Biosynthesis of zymosterol
r758	NADPH[c] + IIZYMST[c] -> NADP[c] + ZYMST[c]	evm.model.scaffold00160.16	evm.model.scaffold00160.16	C-3 sterol keto reductase (zymosterol)	1.1.1.270	Biosynthesis of zymosterol
r759	ZYMST[c] -> DMSTL[c]	Gap	Gap	C-8,7 sterol isomerase (lump reaction)	5.3.3.5	Biosynthesis of ergosterol
r760	SAM[c] + ZYMST[c] -> SAH[c] + FEST[c]	evm.model.scaffold00283.10;evm.model.scaffold00214.21;evm.model.scaffold00160.11	evm.model.scaffold00283.10;evm.model.scaffold00214.21;evm.model.scaffold00160.11	S-adenosyl-methionine delta-24-sterol-c-methyltransferase	2.1.1.41	Biosynthesis of ergosterol
r761	FEST[c] -> EPST[c]	evm.model.scaffold00055.18	evm.model.scaffold00055.18	C-8 sterol isomerase	5.3.3.-	Biosynthesis of ergosterol
r762	NADPH[c] + O2[c] + EPST[c] -> NADP[c] + ERGOTRI[c]	evm.model.scaffold00013.71	evm.model.scaffold00013.71	C-5 sterol desaturase	1.3.3.-	Biosynthesis of ergosterol
r763	NADPH[c] + O2[c] + ERGOTRI[c] -> NADP[c] + ERGOTET[c]	Gap	Gap	C-22 sterol desaturase	1.14.14.-	Biosynthesis of ergosterol
r764	NADPH[c] + ERGOTET[c] -> NADP[c] + ERGOST[c]	evm.model.scaffold00107.12;evm.model.scaffold00192.14;evm.model.scaffold00192.13	evm.model.scaffold00107.12;evm.model.scaffold00192.14;evm.model.scaffold00192.13	C-24(28) sterol reductase	1.3.1.71	Biosynthesis of ergosterol
r765	ERGOST[c] + 0.076 C160COA[c] + 0.312 C181COA[c] + 0.281 C182COA[c] + 0.317 C183COA[c] + 0.014 C180COA[c] -> COA[c] + ERGOSE[c]	evm.model.scaffold00035.57;evm.model.scaffold00127.7	evm.model.scaffold00035.57;evm.model.scaffold00127.7	Sterol O-acyltransferase	2.3.1.26	Biosynthesis of ergosterol
r766	H2O[c] + ERGOSE[c] -> ERGOST[c] + 0.076 C160[c] + 0.312 C181[c] + 0.281 C182[c] + 0.317 C183[c] + 0.014 C180[c]	evm.model.scaffold00007.23; evm.model.scaffold00232.15; evm.model.scaffold00131.9	evm.model.scaffold00007.23; evm.model.scaffold00232.15; evm.model.scaffold00131.9	Sterol esterase	3.1.1.13	Biosynthesis of ergosterol
r767	S23E[c] -> CCANOL[c]	Gap	Gap	Cycloartenol synthase	5.4.99.8	Biosynthesis of episterol
r768	SAM[c] + CCANOL[c] -> SAH[c] + MCCANOL[c]	evm.model.scaffold00283.10	evm.model.scaffold00283.10	Sterol 24-C-methyltransferase	2.1.1.41	Biosynthesis of episterol
r769	3 NADPH[b] + 3 O2[b] + MCCANOL[b] -> 3 NADP[b] + CCECNOL[b]	evm.model.scaffold00154.2	evm.model.scaffold00154.2	C-4 methyl sterol oxidase	1.14.13.72	Biosynthesis of episterol
r770	CCECNOL[c] -> OBSFUL[c]	Gap	Gap	Cycloeucalel cycloisomerase	5.5.1.9	Biosynthesis of episterol
r771	3 NADPH[c] + 3 O2[c] + OBSFUL[c] -> 4 H2O[c] + 3 NADP[c] + FOR[c] + 45ERSOL[c]	evm.model.scaffold00020.44; evm.model.scaffold00214.7	evm.model.scaffold00020.44; evm.model.scaffold00214.7	Sterol 14alpha-demethylase	1.14.14.154	Biosynthesis of episterol
r772	NADPH[b] + 45ERSOL[b] -> NADP[b] + MFEST[b]	evm.model.scaffold00208.8;evm.model.scaffold00016.53	evm.model.scaffold00208.8;evm.model.scaffold00016.53	C-14 sterol reductase	1.3.1.70	Biosynthesis of episterol
r773	MFEST[b] -> MLEPNOL[b]	Gap	Gap	C-8,7 sterol isomerase (lump reaction)	5.3.3.5	Biosynthesis of episterol
r774	3 NADPH[b] + 3 O2[b] + MLEPL[b] -> 3 NADP[b] + EPST[b]	evm.model.scaffold00154.2	evm.model.scaffold00154.2	C-4 methyl sterol oxidase	1.14.13.72	Biosynthesis of episterol
r775	H2O[c] + MAGLY[c] -> GL[c] + 0.2720 C160[c] + 0.0051 C161[c] + 0.0304 C180[c] + 0.1534 C181[c] + 0.6673 C182[c] + 0.0404 C183[c]	evm.model.scaffold00043.20; evm.model.scaffold00269.1	evm.model.scaffold00043.20; evm.model.scaffold00269.1	Acylglycerol lipase	3.1.1.23	Glycerolipid biosynthesis
r776	H2O[e] + TAGLY[e] -> DAGLY[e] + 0.3544 C160[e] + 0.3423 C181[e] + 0.1421 C182[e] + 0.1201 C183[e] + 0.041 C180[e]	evm.model.scaffold00001.31; evm.model.scaffold00001.81; evm.model.scaffold00042.33; evm.model.scaffold00113.12; evm.model.scaffold00427.3;evm.model.scaffold00209.14; evm.model.scaffold00209.18; evm.model.scaffold00031.5	evm.model.scaffold00001.31; evm.model.scaffold00001.81; evm.model.scaffold00042.33; evm.model.scaffold00113.12; evm.model.scaffold00427.3;evm.model.scaffold00209.14; evm.model.scaffold00209.18; evm.model.scaffold00031.5	Extracellular triacylglycerol lipase	3.1.1.3	Glycerolipid biosynthesis
r777	H2O[c] + TAGLY[c] -> DAGLY[c] + 0.3544 C160[c] + 0.3423 C181[c] + 0.1421 C182[c] + 0.1201 C183[c] + 0.041 C180[c]	evm.model.scaffold00091.18; evm.model.scaffold00034.33; evm.model.scaffold00041.19; evm.model.scaffold00173.23; evm.model.scaffold00070.44; evm.model.scaffold00170.9; evm.model.scaffold00041.20	evm.model.scaffold00091.18; evm.model.scaffold00034.33; evm.model.scaffold00041.19; evm.model.scaffold00173.23; evm.model.scaffold00070.44; evm.model.scaffold00170.9; evm.model.scaffold00041.20	Triacylglycerol lipase	3.1.1.3	Glycerolipid biosynthesis
r778	TAGLY[c] + H2O[c] -> DAGLY[c] + 0.4710 C160ACP[c] + 0.0242 C161ACP[c] + 0.1535 C180ACP[c] + 0.5328 C181ACP[c] + 2.3362 C182ACP[c] + 0.1499 C183ACP[c]	evm.model.scaffold00091.18; evm.model.scaffold00034.33; evm.model.scaffold00041.19; evm.model.scaffold00173.23; evm.model.scaffold00070.44; evm.model.scaffold00170.9; evm.model.scaffold00041.20	evm.model.scaffold00091.18; evm.model.scaffold00034.33; evm.model.scaffold00041.19; evm.model.scaffold00173.23; evm.model.scaffold00070.44; evm.model.scaffold00170.9; evm.model.scaffold00041.20	Triacylglycerol lipase	3.1.1.3	Glycerolipid biosynthesis
r779	DAGLY[c] + H2O[c] -> MAGLY[c] + 0.2938 C160[c] + 0.3994 C181[c] + 0.1544 C182[c] + 0.1295 C183[c] + 0.0229 C180[c]	evm.model.scaffold00091.18; evm.model.scaffold00034.33; evm.model.scaffold00041.19; evm.model.scaffold00173.23; evm.model.scaffold00070.44; evm.model.scaffold00170.9; evm.model.scaffold00041.20	evm.model.scaffold00091.18; evm.model.scaffold00034.33; evm.model.scaffold00041.19; evm.model.scaffold00173.23; evm.model.scaffold00070.44; evm.model.scaffold00170.9; evm.model.scaffold00041.20	Triacylglycerol lipase	3.1.1.3	Glycerolipid biosynthesis
r780	DAGLY[b] + H2O[b] -> MAGLY[b] + 0.2938 C160[b] + 0.3994 C181[b] + 0.1544 C182[b] + 0.1295 C183[b] + 0.0229 C180[b]	evm.model.scaffold00091.18; evm.model.scaffold00034.33; evm.model.scaffold00041.19; evm.model.scaffold00173.23; evm.model.scaffold00070.44; evm.model.scaffold00170.9; evm.model.scaffold00041.20	evm.model.scaffold00091.18; evm.model.scaffold00034.33; evm.model.scaffold00041.19; evm.model.scaffold00173.23; evm.model.scaffold00070.44; evm.model.scaffold00170.9; evm.model.scaffold00041.20	Triacylglycerol lipase	3.1.1.3	Glycerolipid biosynthesis
r781	GL3P[c] + 0.2938 C160COA[c] + 0.3994 C181COA[c] + 0.1544 C182COA[c] + 0.1295 C183COA[c] + 0.0229 C180COA[c] -> COA[c] + DAGLYP[c]	evm.model.scaffold00384.1; evm.model.scaffold00039.11; evm.model.scaffold00060.3; evm.model.scaffold00090.2; evm.model.scaffold00114.9; evm.model.scaffold00174.26; evm.model.scaffold00195.1; evm.model.scaffold00024.50; evm.model.scaffold00076.23; evm.model.scaffold00339.3; evm.model.scaffold00570.1; evm.model.scaffold00087.6	evm.model.scaffold00384.1; evm.model.scaffold00039.11; evm.model.scaffold00060.3; evm.model.scaffold00090.2; evm.model.scaffold00114.9; evm.model.scaffold00174.26; evm.model.scaffold00195.1; evm.model.scaffold00024.50; evm.model.scaffold00076.23; evm.model.scaffold00339.3; evm.model.scaffold00570.1; evm.model.scaffold00087.6	Glycerol-3-phosphate acyltransferase	2.3.1.15; 2.3.1.51	Glycerolipid biosynthesis
r782	H2O[c] + DAGLYP[c] -> PI[c] + DAGLY[c]	evm.model.scaffold00262.20; evm.model.scaffold00052.15	evm.model.scaffold00262.20; evm.model.scaffold00052.15	Phosphatidate phosphatase	3.1.3.4	Glycerolipid biosynthesis
r783	DAGLY[c] + 0.3544 C160COA[c] + 0.3423 C181COA[c] + 0.1421 C182COA[c] + 0.1201 C183COA[c] + 0.041 C180COA[c] -> TAGLY[c] + COA[c]	evm.model.scaffold00057.11	evm.model.scaffold00057.11	Diacylglycerol O-acyltransferase	2.3.1.20	Glycerolipid biosynthesis
r784	DAGLY[b] + 0.3544 C160COA[b] + 0.3423 C181COA[b] + 0.1421 C182COA[b] + 0.1201 C183COA[b] + 0.041 C180COA[b] -> TAGLY[b] + COA[b]	evm.model.scaffold00057.11	evm.model.scaffold00057.11	Diacylglycerol O-acyltransferase	2.3.1.20	Glycerolipid biosynthesis
r785	DAGLY[c] + PC[c] -> TAGLY[c] + LPC[c]	evm.model.scaffold00134.21;evm.model.scaffold00200.3	evm.model.scaffold00134.21;evm.model.scaffold00200.3	Phospholipid:diacylglycerol acyltransferase	2.3.1.158	Glycerolipid biosynthesis
r786	GL[c] + NADP[c] <=> GLYN[c] + NADPH[c]	evm.model.scaffold00499.1; evm.model.scaffold00014.15; evm.model.scaffold00087.20; evm.model.scaffold00357.2	evm.model.scaffold00499.1; evm.model.scaffold00014.15; evm.model.scaffold00087.20; evm.model.scaffold00357.2	Glycerol 2-dehydrogenase	1.1.1.156	Glycerolipid biosynthesis
r787	GLYN[c] + ATP[c] -> T3P2[c] + ADP[c]	evm.model.scaffold00132.32;evm.model.scaffold00149.31	evm.model.scaffold00132.32;evm.model.scaffold00149.31	Dihydroxyacetone kinase	2.7.1.29	Glycerolipid biosynthesis
r788	ATP[c] + GL[c] -> ADP[c] + GL3P[c]	evm.model.scaffold00269.3;evm.model.scaffold00015.34	evm.model.scaffold00269.3;evm.model.scaffold00015.34	Glycerol kinase	2.7.1.30	Glycerolipid biosynthesis
r789	ATP[b] + GL[b] -> ADP[b] + GL3P[b]	evm.model.scaffold00269.3;evm.model.scaffold00015.34	evm.model.scaffold00269.3;evm.model.scaffold00015.34	Glycerol kinase	2.7.1.30	Glycerolipid biosynthesis
r790	Q[c] + GL3P[c] -> T3P2[c] + QH2[c]	evm.model.scaffold00095.33;evm.model.scaffold00353.5	evm.model.scaffold00095.33;evm.model.scaffold00353.5	Glycerol-3-phosphate dehydrogenase	1.1.5.3	Glycerolipid biosynthesis
r791	NAD[c] + GL3P[c] -> T3P2[c] + NADH[c]	evm.model.scaffold00770.1;evm.model.scaffold00016.15;evm.model.scaffold00018.46;evm.model.scaffold00409.0	evm.model.scaffold00770.1;evm.model.scaffold00016.15;evm.model.scaffold00018.46;evm.model.scaffold00409.0	Glycerol 3-phosphate dehydrogenase	1.1.1.8	Glycerolipid biosynthesis
r792	SER[b] + C160COA[b] -> COA[b] + CO2[b] + DHSPH[b]	evm.model.scaffold00196.7	evm.model.scaffold00196.7	Serine C-palmitoyltransferase	2.3.1.50	Sphingolipid biosynthesis
r793	SER[m] + C160COA[m] -> COA[m] + CO2[m] + DHSPH[m]	evm.model.scaffold00064.8	evm.model.scaffold00064.8	Serine C-palmitoyltransferase	2.3.1.50	Sphingolipid biosynthesis
r794	SER[c] + C160COA[c] -> CO2[c] + COA[c] + DHSPH[c]	evm.model.scaffold00335.7;evm.model.scaffold00232.2	evm.model.scaffold00335.7;evm.model.scaffold00232.2	Serine C-palmitoyltransferase	2.3.1.50	Sphingolipid biosynthesis
r795	NADPH[c] + DHSPH[c] -> NADP[c] + SPH[c]	evm.model.scaffold00130.20	evm.model.scaffold00130.20	3-dehydrosphinganine reductase	1.1.1.102	Sphingolipid biosynthesis
r796	PSPH[b] + ACOA[b] -> CER3[b] + COA[b]	evm.model.scaffold00014.45;evm.model.scaffold00170.20;evm.model.scaffold00023.27;evm.model.scaffold00145.10	evm.model.scaffold00014.45;evm.model.scaffold00170.20;evm.model.scaffold00023.27;evm.model.scaffold00145.10	Ceramide synthase	2.3.1.24	Sphingolipid biosynthesis
r797	SPH[b] + ACOA[b] -> CER2[b] + COA[b]	evm.model.scaffold00014.45;evm.model.scaffold00170.20;evm.model.scaffold00023.27;evm.model.scaffold00145.10	evm.model.scaffold00014.45;evm.model.scaffold00170.20;evm.model.scaffold00023.27;evm.model.scaffold00145.10	Ceramide synthase	2.3.1.24	Sphingolipid biosynthesis
r798	SPGS[b] + ACOA[b] -> CER1[b] + COA[b]	evm.model.scaffold00014.45;evm.model.scaffold00170.20;evm.model.scaffold00023.27;evm.model.scaffold00145.10	evm.model.scaffold00014.45;evm.model.scaffold00170.20;evm.model.scaffold00023.27;evm.model.scaffold00145.10	Ceramide synthase	2.3.1.24	Sphingolipid biosynthesis
r799	SPH[b] + 2 FERROB5[b] + O2[b] -> PSPH[b] + 2 FERRIB5[b] + H2O[b]	evm.model.scaffold00205.7	evm.model.scaffold00205.7	Sphinganine C4-monooxygenase	1.14.18.5	Sphingolipid biosynthesis
r800	CER2[b] + 2 FERROB5[b] + O2[b] -> CER3[b] + 2 FERRIB5[b] + H2O[b]	evm.model.scaffold00205.7	evm.model.scaffold00205.7	Sphinganine C4-monooxygenase	1.14.18.5	Sphingolipid biosynthesis
r801	CER2[b] + 2 FERROB5[b] + O2[b] -> CER1[b] + 2 FERRIB5[b + 2 H2O[b]	evm.model.scaffold00014.55	evm.model.scaffold00014.55	Sphingolipid delta-4 desaturase	1.14.19.17	Sphingolipid biosynthesis	Updated reaction
r802	H2O[b] + CER2[b] -> ACOOH[b] + SPH[b]	evm.model.scaffold00044.51	evm.model.scaffold00044.51	Dihydroceramidase	3.5.1.-	Sphingolipid biosynthesis
r803	H2O[e] + SPMYLIN[e] -> CER1[e] + PCHO[e]	evm.model.scaffold00026.28	evm.model.scaffold00026.28	Sphingomyelin phosphodiesterase	3.1.4.12	Sphingolipid biosynthesis
r804	H2O[c] + SPMYLIN[c] -> CER1[c] + PCHO[c]	evm.model.scaffold00026.28	evm.model.scaffold00026.28	Sphingomyelin phosphodiesterase	3.1.4.12	Sphingolipid biosynthesis
r805	UDPG[b] + CER1[b] -> UDP[b] + GLYLCR[b]	evm.model.scaffold00121.2	evm.model.scaffold00121.2	Ceramide glucosyltransferase	2.4.1.80	Sphingolipid biosynthesis
r806	NADPH[b] + O2[b] + PSPH[b] -> NADP[b] + 2 H2O[b] + C18PSPG[b]	evm.model.scaffold00010.52	evm.model.scaffold00010.52	Delta8-fatty-acid desaturase	1.14.19.4	Sphingolipid biosynthesis
r807	ATP[c] + SPH[c] -> ADP[c] + DHSP[c]	evm.model.scaffold00184.12	evm.model.scaffold00184.12	Sphingolipid long chain base kinase (sphinganine)	2.7.1.91	Sphingolipid biosynthesis
r808	ATP[m] + SPH[m] -> ADP[m] + DHSP[m]	evm.model.scaffold00064.19	evm.model.scaffold00064.19	Sphingolipid long chain base kinase (sphinganine)	2.7.1.91	Sphingolipid biosynthesis
r809	ATP[c] + PSPH[c] -> ADP[c] + PHSP[c]	evm.model.scaffold00184.12	evm.model.scaffold00184.12	Sphingolipid long chain base kinase (phytosphingosine)	2.7.1.91	Sphingolipid biosynthesis
r810	ATP[m] + PSPH[m] -> ADP[m] + PHSP[m]	evm.model.scaffold00064.19	evm.model.scaffold00064.19	Sphingolipid long chain base kinase (phytosphingosine)	2.7.1.91	Sphingolipid biosynthesis
r811	ATP[c] + SPSE[c] -> ADP[c] + SHSP[c]	evm.model.scaffold00184.12	evm.model.scaffold00184.12	Sphingolipid long chain base kinase (sphingosine)	2.7.1.91	Sphingolipid biosynthesis
r812	ATP[m] + SPSE[m] -> ADP[m] + SHSP[m]	evm.model.scaffold00064.19	evm.model.scaffold00064.19	Sphingolipid long chain base kinase (sphingosine)	2.7.1.91	Sphingolipid biosynthesis
r813	DHSP[m] -> PETHM[m] + C16A[m]	evm.model.scaffold00029.8	evm.model.scaffold00029.8	Sphinganine phosphate lyase	4.1.2.27	Sphingolipid biosynthesis
r814	PHSP[m] -> PETHM[m] + C16A[m]	evm.model.scaffold00029.8	evm.model.scaffold00029.8	Phytosphingosine phosphate lyase	4.1.2.27	Sphingolipid biosynthesis
r815	PHSP[b] -> PI[b] + PSPH[b]	evm.model.scaffold00086.9	evm.model.scaffold00086.9	Sphingoid base-phosphate phosphatase (phytosphingosine 1-phosphate)	3.1.3.-	Sphingolipid biosynthesis
r816	DHSP[b] -> PI[b] + SPH[b]	evm.model.scaffold00086.9	evm.model.scaffold00086.9	Sphingoid base-phosphate phosphatase (sphinganine 1-phosphatase)	3.1.3.-	Sphingolipid biosynthesis
r817	SHSP[b] -> PI[b] + SPSE[b]	evm.model.scaffold00086.9	evm.model.scaffold00086.9	Sphingoid base-phosphate phosphatase (sphingosine 1-phosphatase)	3.1.3.-	Sphingolipid biosynthesis
r818	CER3[e] + H2O[e] -> ACOOH[e] + PSPH[e]	evm.model.scaffold00037.27	evm.model.scaffold00037.27	Ceramidase	3.5.1.23	Sphingolipid metabolism
r819	CER2[e] + H2O[e] -> ACOOH[e] + SPH[e]	evm.model.scaffold00037.27	evm.model.scaffold00037.27	Ceramidase	3.5.1.23	Sphingolipid metabolism
r820	CER1[e] + H2O[e] -> ACOOH[e] + SPSE[e]	evm.model.scaffold00037.27	evm.model.scaffold00037.27	Ceramidase	3.5.1.23	Sphingolipid metabolism
r821	GASCER[e] + H2O[e] -> GLAC[e] + CER1[e]	Gap	Gap	Galactosylceramidase	3.2.1.46	Sphingolipid metabolism
r822	SUFT[e] + H2O[e] -> GASCER[e] + SLF[e]	evm.model.scaffold00203.19;evm.model.scaffold00028.29	evm.model.scaffold00203.19;evm.model.scaffold00028.29	arylsulfatase	3.1.6.1	Sphingolipid metabolism
r823	DAGLYP[b] + CTP[b] -> PPI[b] + CLCDPDG[b]	evm.model.scaffold00275.12; evm.model.scaffold00088.39	evm.model.scaffold00275.12; evm.model.scaffold00088.39	CDP-diacylglycerol synthetase (phosphatidate cytidylyltransferase )	2.7.7.41	Glycerophospholipid biosynthesis
r824	CLCDPDG[e] + GL3P[e] -> CMP[e] + CLPIGP[e]	evm.model.scaffold00079.32	evm.model.scaffold00079.32	CDP-diacylglycerol-glycerol-3-phosphate 3-phosphatidyltransferase	2.7.8.5	Glycerophospholipid biosynthesis
r825	GL3P[m] + CLCDPDG[m] -> CMP[m] + CLPIGP[m]	evm.model.scaffold00079.32	evm.model.scaffold00079.32	CDP-diacylglycerol-glycerol-3-phosphate 3-phosphatidyltransferase	2.7.8.5	Glycerophospholipid biosynthesis
r826	H2O[c] + CLPIGP[c] -> PI[c] + PG[c]	evm.model.scaffold00130.21	evm.model.scaffold00130.21	Phosphatidylglycerophosphatase	3.1.3.27	Glycerophospholipid biosynthesis
r827	CLCDPDG[b] + PG[b] -> CMP[b] + CL[b]	evm.model.scaffold00246.9	evm.model.scaffold00246.9	Cardiolipin synthase	2.7.8.-	Glycerophospholipid biosynthesis
r828	T3P2[c] + 0.243 C160COA[c] + 0.264 C181COA[c] + 0.255 C182COA[c] + 0.209 C183COA[c] + 0.029 C180COA[c] -> COA[c] + AT3P2[c]	evm.model.scaffold00222.1; evm.model.scaffold00384.1; evm.model.scaffold00039.11; evm.model.scaffold00060.3; evm.model.scaffold00090.2; evm.model.scaffold00114.9; evm.model.scaffold00174.26; evm.model.scaffold00195.1	evm.model.scaffold00222.1; evm.model.scaffold00384.1; evm.model.scaffold00039.11; evm.model.scaffold00060.3; evm.model.scaffold00090.2; evm.model.scaffold00114.9; evm.model.scaffold00174.26; evm.model.scaffold00195.1	Glycerone-phosphate O-acyltransferase	2.3.1.42	Glycerophospholipid biosynthesis
r829	NADPH[c] + AT3P2[c] -> NADP[c] + LPA[c]	Gap	Gap	Acylglycerone-phosphate reductase	1.1.1.101	Glycerophospholipid biosynthesis
r830	LPA[c] + 0.243 C160COA[c] + 0.264 C181COA[c] + 0.255 C182COA[c] + 0.209 C183COA[c] + 0.029 C180COA[c] -> COA[c] + PA[c]	evm.model.scaffold00076.23; evm.model.scaffold00339.3; evm.model.scaffold00570.1; evm.model.scaffold00087.6	evm.model.scaffold00076.23; evm.model.scaffold00339.3; evm.model.scaffold00570.1; evm.model.scaffold00087.6	Lysophosphatidic acid acyltransferase	2.3.1.51	Glycerophospholipid biosynthesis
r831	H2O[c] + PA[c] -> PI[c] + DAGLY[c]	evm.model.scaffold00262.20	evm.model.scaffold00262.20	Phosphatidate phosphatase	3.1.3.4	Glycerophospholipid biosynthesis
r832	ATP[c] + DAGLY[c] -> ADP[c] + PA[c]	evm.model.scaffold00022.45; evm.model.scaffold00130.6	evm.model.scaffold00022.45; evm.model.scaffold00130.6	Diacylglycerol kinase	2.7.1.107	Glycerophospholipid biosynthesis
r833	ATP[m] + DAGLY[m] -> ADP[m] + PA[m]	evm.model.scaffold00022.45; evm.model.scaffold00130.6	evm.model.scaffold00022.45; evm.model.scaffold00130.6	Diacylglycerol kinase	2.7.1.107	Glycerophospholipid biosynthesis
r834	DAGLY[c] + CDPETN[c] <=> CMP[c] + PE[c]	evm.model.scaffold00011.7;evm.model.scaffold00101.21	evm.model.scaffold00011.7;evm.model.scaffold00101.21	Choline/ethalaminephosphotransferase	2.7.8.1	Glycerophospholipid biosynthesis
r835	CTP[c] + PCHO[c] -> PPI[c] + CDPCHO[c]	evm.model.scaffold00054.9;evm.model.scaffold00281.6;evm.model.scaffold00226.7	evm.model.scaffold00054.9;evm.model.scaffold00281.6;evm.model.scaffold00226.7	Cholinephosphate cytidylyltransferase	2.7.7.15	Glycerophospholipid biosynthesis
r836	ATP[c] + CHO[c] -> ADP[c] + PCHO[c]	evm.model.scaffold00182.18;evm.model.scaffold00046.51	evm.model.scaffold00182.18;evm.model.scaffold00046.51	Choline kinase	2.7.1.32	Glycerophospholipid biosynthesis
r837	SAM[b] + PE[b] -> SAH[b] + PMME[b]	evm.model.scaffold00005.35;evm.model.scaffold00023.8;evm.model.scaffold00014.38	evm.model.scaffold00005.35;evm.model.scaffold00023.8;evm.model.scaffold00014.38	phosphatidylethanolamine methyltransferase	2.1.1.17	Glycerophospholipid biosynthesis
r838	SAM[b] + POFA[b] -> SAH[b] + PMFA[b]	evm.model.scaffold00023.8	evm.model.scaffold00023.8	Phosphatidyl-N-methylethalamine N-methyltransferase	2.1.1.16	Glycerophospholipid biosynthesis
r839	H2O[c] + PC[c] -> 0.057 C160[c] + 0.211 C181[c] + 0.357 C182[c] + 0.361 C183[c] + 0.014 C180[c] + LPC[c]	evm.model.scaffold00122.4; evm.model.scaffold00168.16	evm.model.scaffold00122.4; evm.model.scaffold00168.16	Phospholipase A2	3.1.1.4	Glycerophospholipid biosynthesis
r840	H2O[c] + PC[c] -> 0.057 C160[c] + 0.211 C181[c] + 0.357 C182[c] + 0.361 C183[c] + 0.014 C180[c] + GLYCEROCHO[c]	evm.model.scaffold00017.8; evm.model.scaffold00024.22; evm.model.scaffold00024.23; evm.model.scaffold00029.42; evm.model.scaffold00071.40; evm.model.scaffold00079.34; evm.model.scaffold00111.28	evm.model.scaffold00017.8; evm.model.scaffold00024.22; evm.model.scaffold00024.23; evm.model.scaffold00029.42; evm.model.scaffold00071.40; evm.model.scaffold00079.34; evm.model.scaffold00111.28	Phospholipase B1, membrane-associated	3.1.1.4; 3.1.1.5	Glycerophospholipid biosynthesis
r841	LPC[c] + 0.057 C160COA[c] + 0.211 C181COA[c] + 0.357 C182COA[c] + 0.361 C183COA[c] + 0.014 C180COA[c] -> COA[c] + PC[c]	evm.model.scaffold00018.29	evm.model.scaffold00018.29	Lysophosphatide acyltransferase	2.3.1.23	Glycerophospholipid biosynthesis
r842	H2O[c] + PE[c] -> 0.1898 C160[c] + 0.3193 C181[c] + 0.2108 C182[c] + 0.2751 C183[c] + 0.005 C180[c] + LPE[c]	evm.model.scaffold00122.4; evm.model.scaffold00168.16	evm.model.scaffold00122.4; evm.model.scaffold00168.16	Phospholipase A2	3.1.1.4	Glycerophospholipid biosynthesis
r843	LPE[c] + 0.1898 C160COA[c] + 0.3193 C181COA[c] + 0.2108 C182COA[c] + 0.2751 C183COA[c] + 0.005 C180COA[c] -> COA[c] + PE[c]	evm.model.scaffold00018.29	evm.model.scaffold00018.29	Lysophosphatide acyltransferase	2.3.1.23	Glycerophospholipid biosynthesis
r844	H2O[c] + LPC[c] -> ACOOH[c] + GLYCEROCHO[c]	evm.model.scaffold00168.13; evm.model.scaffold00009.2; evm.model.scaffold00021.24	evm.model.scaffold00168.13; evm.model.scaffold00009.2; evm.model.scaffold00021.24	Lysophospholipase	3.1.1.5	Glycerophospholipid biosynthesis
r845	H2O[b] + LPC[b] -> ACOOH[b] + GLYCEROCHO[b]	evm.model.scaffold00168.13; evm.model.scaffold00009.2; evm.model.scaffold00021.24	evm.model.scaffold00168.13; evm.model.scaffold00009.2; evm.model.scaffold00021.24	Lysophospholipase	3.1.1.5	Glycerophospholipid biosynthesis
r846	H2O[c] + LPE[c] -> ACOOH[c] + GLYCEROETM[c]	evm.model.scaffold00168.13; evm.model.scaffold00009.2; evm.model.scaffold00021.24	evm.model.scaffold00168.13; evm.model.scaffold00009.2; evm.model.scaffold00021.24	Lysophospholipase	3.1.1.5	Glycerophospholipid biosynthesis
r847	H2O[b] + LPE[b] -> ACOOH[b] + GLYCEROETM[b]	evm.model.scaffold00168.13; evm.model.scaffold00009.2; evm.model.scaffold00021.24	evm.model.scaffold00168.13; evm.model.scaffold00009.2; evm.model.scaffold00021.24	Lysophospholipase	3.1.1.5	Glycerophospholipid biosynthesis
r848	H2O[m] + PC[m] -> PA[m] + CHO[m]	evm.model.scaffold00028.22	evm.model.scaffold00028.22	Phospholipase D	3.1.4.4	Glycerophospholipid biosynthesis
r849	H2O[b] + PC[b] -> CHO[b] + PA[b]	evm.model.scaffold00002.67	evm.model.scaffold00002.67	similar to phospholipase D1	3.1.4.4	Glycerophospholipid biosynthesis
r850	H2O[c] + PC[c] -> CHO[c] + PA[c]	evm.model.scaffold00204.11;evm.model.scaffold00052.1;evm.model.scaffold00247.1;evm.model.scaffold00040.46; evm.model.scaffold00055.22	evm.model.scaffold00204.11;evm.model.scaffold00052.1;evm.model.scaffold00247.1;evm.model.scaffold00040.46; evm.model.scaffold00055.22	similar to phospholipase D1	3.1.4.4	Glycerophospholipid biosynthesis
r851	CTP[b] + PA[b] <=> CDPDG[b] + PPI[b]	evm.model.scaffold00275.12	evm.model.scaffold00275.12	CDP-diacylglycerol synthase	2.7.7.41	Glycerophospholipid biosynthesis
r852	CTP[c] + PETHM[c] -> PPI[c] + CDPETN[c]	evm.model.scaffold00047.21;evm.model.scaffold00063.31	evm.model.scaffold00047.21;evm.model.scaffold00063.31	Phosphoethalamine transferase	2.7.7.14	Glycerophospholipid biosynthesis
r853	CDPDG[b] + SER[b] <=> CMP[b] + PS[b]	evm.model.scaffold00297.11	evm.model.scaffold00297.11	Phosphatidylserine synthase	2.7.8.8	Glycerophospholipid biosynthesis
r854	SER[b] + PE[b] -> PS[b] + ETHAM[b]	evm.model.scaffold00240.11	evm.model.scaffold00240.11	Phosphatidylserine synthase 2	2.7.8.29	Glycerophospholipid biosynthesis
r855	ATP[c] + ETHAM[c] -> ADP[c] + PETHM[c]	evm.model.scaffold00115.23	evm.model.scaffold00115.23	Ethanolamine kinase	2.7.1.82	Glycerophospholipid biosynthesis
r856	PS[c] -> CO2[c] + PE[c]	evm.model.scaffold00021.2; evm.model.scaffold00006.57;evm.model.scaffold00058.11;evm.model.scaffold00149.13	evm.model.scaffold00021.2; evm.model.scaffold00006.57;evm.model.scaffold00058.11;evm.model.scaffold00149.13	Phosphatidylserine decarboxylase	4.1.1.65	Glycerophospholipid biosynthesis
r857	SAM[b] + PMME[b] -> SAH[b] + PDME[b]	evm.model.scaffold00023.8	evm.model.scaffold00023.8	Phospholipid methyltransferase	2.1.1.71	Glycerophospholipid biosynthesis
r858	SAM[b] + PDME[b] -> SAH[b] + PC[b]	evm.model.scaffold00023.8	evm.model.scaffold00023.8	Phospholipid methyltransferase	2.1.1.71	Glycerophospholipid biosynthesis
r859	0.2827 C160COA[c] + 0.3435 C181COA[c] + 0.1388 C182COA[c] + 0.2239 C183COA[c] + 0.0111 C180COA[c] + ACGLPE[c] -> COA[c] + PS[c]	0	0	Formation of long chain fatty acids for phosphatidylserine		Glycerophospholipid biosynthesis
r860	0.5488 C160COA[c] + 0.0222 C180COA[c] + 0.2336 C181COA[c] + 0.1450 C182COA[c] + 0.0504 C183COA[c] -> PINS[c] + COA[c]	0	0	Formation of long chain fatty acids for 1-phosphatidyl-1D-myo-inositols		Glycerophospholipid biosynthesis	Added reaction
r861	ACCOA[b] + LYSOPAF[b] -> COA[b] + PAF[b]	evm.model.scaffold00427.4	evm.model.scaffold00427.4	Lysophosphatidylcholine acyltransferase; lyso-PAF acetyltransferase	2.3.1.23; 2.3.1.67	Ether lipid metabolism
r862	ATP[c] + HCO3[c] + BCCP[c] -> ADP[c] + PI[c] + CBCCP[c]	evm.model.scaffold00021.30;evm.model.scaffold00023.50	evm.model.scaffold00021.30;evm.model.scaffold00023.50	Biotin carboxylase	6.3.4.14	Fatty acid biosynthesis
r863	ATP[c] + HCO3[c] + ACCOA[c] -> ADP[c] + PI[c] + MALCOA[c]	evm.model.scaffold00021.30;evm.model.scaffold00023.50	evm.model.scaffold00021.30;evm.model.scaffold00023.50	Acetyl-CoA carboxylase	6.4.1.2	Fatty acid biosynthesis
r864	ACCOA[c] + ACP[c] -> COA[c] + ACACP[c]	evm.model.scaffold00002.57;evm.model.scaffold00111.12	evm.model.scaffold00002.57;evm.model.scaffold00111.12	ACP-acetyltransferase	2.3.1.38	Fatty acid biosynthesis
r865	MALCOA[m] + ACP[m] -> COA[m] + MALACP[m]	evm.model.scaffold00069.10	evm.model.scaffold00069.10	ACP-malonyltransferase	2.3.1.39	Fatty acid biosynthesis
r866	MALCOA[c] + ACP[c] <=> MALACP[c] + COA[c]	evm.model.scaffold00002.57;evm.model.scaffold00111.12;evm.model.scaffold00069.10	evm.model.scaffold00002.57;evm.model.scaffold00111.12;evm.model.scaffold00069.10	ACP-malonyltransferase	2.3.1.39	Fatty acid biosynthesis
r867	ACACP[c] + MALACP[c] -> AACACP[c] + CO2[c] + ACP[c]	evm.model.scaffold00111.12;evm.model.scaffold00193.18; evm.model.scaffold00002.57	evm.model.scaffold00111.12;evm.model.scaffold00193.18; evm.model.scaffold00002.57	Beta-ketoacyl-[acyl-carrier-protein] synthase I	2.3.1.41	Fatty acid biosynthesis
r868	AACACP[c] + NADPH[c] <=> C4HACP[c] + NADP[c]	evm.model.scaffold00145.13	evm.model.scaffold00145.13	3-oxoacyl-[acyl-carrier-protein] reductase	1.1.1.100	Fatty acid biosynthesis
r869	AACACP[m] + NADPH[m] <=> C4HACP[m] + NADP[m]	evm.model.scaffold00145.13;evm.model.scaffold00169.20	evm.model.scaffold00145.13;evm.model.scaffold00169.20	3-oxoacyl-[acyl-carrier-protein] reductase	1.1.1.100	Fatty acid biosynthesis
r870	C4HACP[c] <=> C4DACP[c] + H2O[c]	evm.model.scaffold00111.12	evm.model.scaffold00111.12	3-hydroxyacyl-[acyl-carrier-protein] dehydratase	4.2.1.59	Fatty acid biosynthesis
r871	C4DACP[c] + NADH[c] <=> C40ACP[c] + NAD[c]	evm.model.scaffold00111.12	evm.model.scaffold00111.12	Acetyl coenzyme A-acyl-carrier-protein transacylase	1.3.1.9	Fatty acid biosynthesis
r872	ACCOA[c] + MALCOA[c] + 2 NADPH[c] -> C40COA[c] + COA[c] + 2 NADP[c] + CO2[c]	evm.model.scaffold00111.12; evm.model.scaffold00002.57	evm.model.scaffold00111.12; evm.model.scaffold00002.57	Fatty-acyl-CoA synthase	2.3.1.86	Fatty acid biosynthesis
r873	ACCOA[m] + MALCOA[m] + 2 NADPH[m] -> C40COA[m] + COA[m] + 2 NADP[m] + CO2[m]	evm.model.scaffold00111.12; evm.model.scaffold00002.57	evm.model.scaffold00111.12; evm.model.scaffold00002.57	Fatty-acyl-CoA synthase	2.3.1.86	Fatty acid biosynthesis
r874	C40ACP[c] + MALACP[c] -> C6OACP[c] + CO2[c] + ACP[c]	evm.model.scaffold00111.12	evm.model.scaffold00111.12	Beta-ketoacyl-[acyl-carrier-protein] synthase I	2.3.1.41	Fatty acid biosynthesis
r875	C6OACP[c] + NADPH[c] <=> C6HACP[c] + NADP[c]	evm.model.scaffold00145.13	evm.model.scaffold00145.13	3-oxoacyl-[acyl-carrier-protein] reductase	1.1.1.100	Fatty acid biosynthesis
r876	C6OACP[m] + NADPH[m] <=> C6HACP[m] + NADP[m]	evm.model.scaffold00145.13;evm.model.scaffold00169.20	evm.model.scaffold00145.13;evm.model.scaffold00169.20	3-oxoacyl-[acyl-carrier-protein] reductase	1.1.1.100	Fatty acid biosynthesis
r877	C6HACP[c] <=> C6DACP[c] + H2O[c]	evm.model.scaffold00111.12	evm.model.scaffold00111.12	3-hydroxyacyl-[acyl-carrier-protein] dehydratase	4.2.1.59	Fatty acid biosynthesis
r878	C6DACP[c] + NADH[c] <=> C60ACP[c] + NAD[c]	evm.model.scaffold00111.12	evm.model.scaffold00111.12	Acetyl coenzyme A-acyl-carrier-protein transacylase	1.3.1.9	Fatty acid biosynthesis
r879	C40COA[c] + MALCOA[c] + 2 NADPH[c] -> C60COA[c] + COA[c] + 2 NADP[c] + CO2[c]	evm.model.scaffold00111.12;evm.model.scaffold00002.57	evm.model.scaffold00111.12;evm.model.scaffold00002.57	Fatty-acyl-CoA synthase	2.3.1.86	Fatty acid biosynthesis
r880	C40COA[m] + MALCOA[m] + 2 NADPH[m] -> C60COA[m] + COA[m] + 2 NADP[m] + CO2[m]	evm.model.scaffold00111.12;evm.model.scaffold00002.57	evm.model.scaffold00111.12;evm.model.scaffold00002.57	Fatty-acyl-CoA synthase	2.3.1.86	Fatty acid biosynthesis
r881	C60ACP[c] + MALACP[c] -> C8OACP[c] + CO2[c] + ACP[c]	evm.model.scaffold00111.12;evm.model.scaffold00193.18	evm.model.scaffold00111.12;evm.model.scaffold00193.18	Beta-ketoacyl-[acyl-carrier-protein] synthase I	2.3.1.41	Fatty acid biosynthesis
r882	C8OACP[c] + NADPH[c] <=> C8HACP[c] + NADP[c]	evm.model.scaffold00145.13	evm.model.scaffold00145.13	3-oxoacyl-[acyl-carrier-protein] reductase	1.1.1.100	Fatty acid biosynthesis
r883	C8OACP[m] + NADPH[m] <=> C8HACP[m] + NADP[m]	evm.model.scaffold00145.13;evm.model.scaffold00169.20	evm.model.scaffold00145.13;evm.model.scaffold00169.20	3-oxoacyl-[acyl-carrier-protein] reductase	1.1.1.100	Fatty acid biosynthesis
r884	C8HACP[c] <=> C8DACP[c] + H2O[c]	evm.model.scaffold00111.12;evm.model.scaffold00002.57	evm.model.scaffold00111.12;evm.model.scaffold00002.57	3-hydroxyacyl-[acyl-carrier-protein] dehydratase	4.2.1.59	Fatty acid biosynthesis
r885	C8DACP[c] + NADH[c] <=> C80ACP[c] + NAD[c]	evm.model.scaffold00111.12;evm.model.scaffold00002.57	evm.model.scaffold00111.12;evm.model.scaffold00002.57	Acetyl coenzyme A-acyl-carrier-protein transacylase	1.3.1.9	Fatty acid biosynthesis
r886	C60COA[c] + MALCOA[c] + 2 NADPH[c] -> C80COA[c] + COA[c] + 2 NADP[c] + CO2[c]	evm.model.scaffold00111.12;evm.model.scaffold00002.57	evm.model.scaffold00111.12;evm.model.scaffold00002.57	Fatty-acyl-CoA synthase	2.3.1.86	Fatty acid biosynthesis
r887	C60COA[m] + MALCOA[m] + 2 NADPH[m] -> C80COA[m] + COA[m] + 2 NADP[m] + CO2[m]	evm.model.scaffold00111.12;evm.model.scaffold00002.57	evm.model.scaffold00111.12;evm.model.scaffold00002.57	Fatty-acyl-CoA synthase	2.3.1.86	Fatty acid biosynthesis
r888	C80ACP[c] + MALACP[c] -> C10OACP[c] + CO2[c] + ACP[c]	evm.model.scaffold00111.12;evm.model.scaffold00193.18	evm.model.scaffold00111.12;evm.model.scaffold00193.18	Beta-ketoacyl-[acyl-carrier-protein] synthase I	2.3.1.41	Fatty acid biosynthesis
r889	C10OACP[c] + NADPH[c] <=> C10HACP[c] + NADP[c]	evm.model.scaffold00145.13	evm.model.scaffold00145.13	3-oxoacyl-[acyl-carrier-protein] reductase	1.1.1.100	Fatty acid biosynthesis
r890	C10OACP[m] + NADPH[m] <=> C10HACP[m] + NADP[m]	evm.model.scaffold00145.13;evm.model.scaffold00169.20	evm.model.scaffold00145.13;evm.model.scaffold00169.20	3-oxoacyl-[acyl-carrier-protein] reductase	1.1.1.100	Fatty acid biosynthesis
r891	C10HACP[c] <=> C10DACP[c] + H2O[c]	evm.model.scaffold00111.12;evm.model.scaffold00002.57	evm.model.scaffold00111.12;evm.model.scaffold00002.57	3-hydroxyacyl-[acyl-carrier-protein] dehydratase	4.2.1.59	Fatty acid biosynthesis
r892	C10DACP[c] + NADH[c] <=> C100ACP[c] + NAD[c]	evm.model.scaffold00111.12;evm.model.scaffold00002.57	evm.model.scaffold00111.12;evm.model.scaffold00002.57	Acetyl coenzyme A-acyl-carrier-protein transacylase	1.3.1.9	Fatty acid biosynthesis
r893	C80COA[c] + MALCOA[c] + 2 NADPH[c] -> C100COA[c] + COA[c] + 2 NADP[c] + CO2[c]	evm.model.scaffold00111.12;evm.model.scaffold00002.57	evm.model.scaffold00111.12;evm.model.scaffold00002.57	Fatty-acyl-CoA synthase	2.3.1.86	Fatty acid biosynthesis
r894	C80COA[m] + MALCOA[m] + 2 NADPH[m] -> C100COA[m] + COA[m] + 2 NADP[m] + CO2[m]	evm.model.scaffold00111.12;evm.model.scaffold00002.57	evm.model.scaffold00111.12;evm.model.scaffold00002.57	Fatty-acyl-CoA synthase	2.3.1.86	Fatty acid biosynthesis
r895	C100ACP[c] + MALACP[c] -> C12OACP[c] + CO2[c] + ACP[c]	evm.model.scaffold00111.12;evm.model.scaffold00193.18	evm.model.scaffold00111.12;evm.model.scaffold00193.18	Beta-ketoacyl-[acyl-carrier-protein] synthase I	2.3.1.41	Fatty acid biosynthesis
r896	C12OACP[c] + NADPH[c] <=> C12HACP[c] + NADP[c]	evm.model.scaffold00145.13	evm.model.scaffold00145.13	3-oxoacyl-[acyl-carrier-protein] reductase	1.1.1.100	Fatty acid biosynthesis
r897	C12OACP[m] + NADPH[m] <=> C12HACP[m] + NADP[m]	evm.model.scaffold00145.13;evm.model.scaffold00169.20	evm.model.scaffold00145.13;evm.model.scaffold00169.20	3-oxoacyl-[acyl-carrier-protein] reductase	1.1.1.100	Fatty acid biosynthesis
r898	C12HACP[c] <=> C12DACP[c] + H2O[c]	evm.model.scaffold00111.12;evm.model.scaffold00002.57	evm.model.scaffold00111.12;evm.model.scaffold00002.57	3-hydroxyacyl-[acyl-carrier-protein] dehydratase	4.2.1.59	Fatty acid biosynthesis
r899	C12DACP[c] + NADH[c] <=> C120ACP[c] + NAD[c]	evm.model.scaffold00111.12;evm.model.scaffold00002.57	evm.model.scaffold00111.12;evm.model.scaffold00002.57	Acetyl coenzyme A-acyl-carrier-protein transacylase	1.3.1.9	Fatty acid biosynthesis
r900	C100COA[c] + MALCOA[c] + 2 NADPH[c] -> C120COA[c] + COA[c] + 2 NADP[c] + CO2[c]	evm.model.scaffold00111.12	evm.model.scaffold00111.12	Fatty-acyl-CoA synthase	2.3.1.86	Fatty acid biosynthesis
r901	C100COA[m] + MALCOA[m] + 2 NADPH[m] -> C120COA[m] + COA[m] + 2 NADP[m] + CO2[m]	evm.model.scaffold00111.12	evm.model.scaffold00111.12	Fatty-acyl-CoA synthase	2.3.1.86	Fatty acid biosynthesis
r902	C120ACP[c] + MALACP[c] -> C14OACP[c] + CO2[c] + ACP[c]	evm.model.scaffold00111.12;evm.model.scaffold00193.18	evm.model.scaffold00111.12;evm.model.scaffold00193.18	Beta-ketoacyl-[acyl-carrier-protein] synthase I	2.3.1.41	Fatty acid biosynthesis
r903	C14OACP[c] + NADPH[c] <=> C14HACP[c] + NADP[c]	evm.model.scaffold00145.13	evm.model.scaffold00145.13	3-oxoacyl-[acyl-carrier-protein] reductase	1.1.1.100	Fatty acid biosynthesis
r904	C14OACP[m] + NADPH[m] <=> C14HACP[m] + NADP[m]	evm.model.scaffold00145.13;evm.model.scaffold00169.20	evm.model.scaffold00145.13;evm.model.scaffold00169.20	3-oxoacyl-[acyl-carrier-protein] reductase	1.1.1.100	Fatty acid biosynthesis
r905	C14HACP[c] <=> C14DACP[c] + H2O[c]	evm.model.scaffold00111.12;evm.model.scaffold00002.57	evm.model.scaffold00111.12;evm.model.scaffold00002.57	3-hydroxyacyl-[acyl-carrier-protein] dehydratase	4.2.1.59	Fatty acid biosynthesis
r906	C14DACP[c] + NADH[c] <=> C140ACP[c] + NAD[c]	evm.model.scaffold00111.12;evm.model.scaffold00002.57	evm.model.scaffold00111.12;evm.model.scaffold00002.57	Acetyl coenzyme A-acyl-carrier-protein transacylase	1.3.1.9	Fatty acid biosynthesis
r907	H2O[c] + C140ACP[c] <=> ACP[c] + C140[c]	evm.model.scaffold00002.57;evm.model.scaffold00111.12	evm.model.scaffold00002.57;evm.model.scaffold00111.12	Acyl-ACP hydrolase	3.1.2.14	Fatty acid biosynthesis
r908	C120COA[c] + MALCOA[c] + 2 NADPH[c] -> C140COA[c] + COA[c] + 2 NADP[c] + CO2[c]	evm.model.scaffold00111.12	evm.model.scaffold00111.12	Fatty-acyl-CoA synthase	2.3.1.86	Fatty acid biosynthesis
r909	C120COA[m] + MALCOA[m] + 2 NADPH[m] -> C140COA[m] + COA[m] + 2 NADP[m] + CO2[m]	evm.model.scaffold00111.12	evm.model.scaffold00111.12	Fatty-acyl-CoA synthase	2.3.1.86	Fatty acid biosynthesis
r910	C140ACP[c] + MALACP[c] -> C16OACP[c] + CO2[c] + ACP[c]	evm.model.scaffold00111.12;evm.model.scaffold00193.18	evm.model.scaffold00111.12;evm.model.scaffold00193.18	Beta-ketoacyl-[acyl-carrier-protein] synthase I	2.3.1.41	Fatty acid biosynthesis
r911	C16OACP[c] + NADPH[c] <=> C16HACP[c] + NADP[c]	evm.model.scaffold00145.13	evm.model.scaffold00145.13	3-oxoacyl-[acyl-carrier-protein] reductase	1.1.1.100	Fatty acid biosynthesis
r912	C16OACP[m] + NADPH[m] <=> C16HACP[m] + NADP[m]	evm.model.scaffold00145.13;evm.model.scaffold00169.20	evm.model.scaffold00145.13;evm.model.scaffold00169.20	3-oxoacyl-[acyl-carrier-protein] reductase	1.1.1.100	Fatty acid biosynthesis
r913	C16HACP[c] <=> C16DACP[c] + H2O[c]	evm.model.scaffold00111.12;evm.model.scaffold00002.57	evm.model.scaffold00111.12;evm.model.scaffold00002.57	3-hydroxyacyl-[acyl-carrier-protein] dehydratase	4.2.1.59	Fatty acid biosynthesis
r914	C16DACP[c] + NADH[c] <=> C160ACP[c] + NAD[c]	evm.model.scaffold00111.12;evm.model.scaffold00002.57	evm.model.scaffold00111.12;evm.model.scaffold00002.57	Acetyl coenzyme A-acyl-carrier-protein transacylase	1.3.1.9	Fatty acid biosynthesis
r915	H2O[c] + C160ACP[c] <=> ACP[c] + C160[c]	evm.model.scaffold00002.57;evm.model.scaffold00111.12	evm.model.scaffold00002.57;evm.model.scaffold00111.12	Acyl-ACP hydrolase	3.1.2.14	Fatty acid biosynthesis
r916	ATP[c] + COA[c] + C160[c] -> AMP[c] + PPI[c] + C160COA[c]	evm.model.scaffold00095.14; evm.model.scaffold00011.19; evm.model.scaffold00025.59; evm.model.scaffold00032.4; evm.model.scaffold00032.14; evm.model.scaffold00037.20; evm.model.scaffold00038.54; evm.model.scaffold00054.53; evm.model.scaffold00081.1; evm.model.scaffold00204.7; evm.model.scaffold00262.12; evm.model.scaffold00563.1	evm.model.scaffold00095.14; evm.model.scaffold00011.19; evm.model.scaffold00025.59; evm.model.scaffold00032.4; evm.model.scaffold00032.14; evm.model.scaffold00037.20; evm.model.scaffold00038.54; evm.model.scaffold00054.53; evm.model.scaffold00081.1; evm.model.scaffold00204.7; evm.model.scaffold00262.12; evm.model.scaffold00563.1	Fatty-acid-CoA ligase	6.2.1.3	Fatty acid biosynthesis
r917	ATP[m] + COA[m] + C160[m] -> AMP[m] + PPI[m] + C160COA[m]	evm.model.scaffold00095.14; evm.model.scaffold00011.19; evm.model.scaffold00025.59; evm.model.scaffold00032.4; evm.model.scaffold00032.14; evm.model.scaffold00037.20; evm.model.scaffold00038.54; evm.model.scaffold00054.53; evm.model.scaffold00081.1; evm.model.scaffold00204.7; evm.model.scaffold00262.12; evm.model.scaffold00563.1	evm.model.scaffold00095.14; evm.model.scaffold00011.19; evm.model.scaffold00025.59; evm.model.scaffold00032.4; evm.model.scaffold00032.14; evm.model.scaffold00037.20; evm.model.scaffold00038.54; evm.model.scaffold00054.53; evm.model.scaffold00081.1; evm.model.scaffold00204.7; evm.model.scaffold00262.12; evm.model.scaffold00563.1	Fatty-acid-CoA ligase	6.2.1.3	Fatty acid biosynthesis
r918	ATP[b] + COA[b] + C160[b] -> AMP[b] + PPI[b] + C160COA[b]	evm.model.scaffold00095.14; evm.model.scaffold00011.19; evm.model.scaffold00025.59; evm.model.scaffold00032.4; evm.model.scaffold00032.14; evm.model.scaffold00037.20; evm.model.scaffold00038.54; evm.model.scaffold00054.53; evm.model.scaffold00081.1; evm.model.scaffold00204.7; evm.model.scaffold00262.12; evm.model.scaffold00563.1	evm.model.scaffold00095.14; evm.model.scaffold00011.19; evm.model.scaffold00025.59; evm.model.scaffold00032.4; evm.model.scaffold00032.14; evm.model.scaffold00037.20; evm.model.scaffold00038.54; evm.model.scaffold00054.53; evm.model.scaffold00081.1; evm.model.scaffold00204.7; evm.model.scaffold00262.12; evm.model.scaffold00563.1	Fatty-acid-CoA ligase	6.2.1.3	Fatty acid biosynthesis
r919	C40[b] + COA[b]+ ATP[b] -> C40COA[b] + H2O[b] + PPI[b] + AMP[b]	evm.model.scaffold00095.14; evm.model.scaffold00011.19; evm.model.scaffold00025.59; evm.model.scaffold00032.4; evm.model.scaffold00032.14; evm.model.scaffold00037.20; evm.model.scaffold00038.54; evm.model.scaffold00054.53; evm.model.scaffold00081.1; evm.model.scaffold00204.7; evm.model.scaffold00262.12; evm.model.scaffold00563.1	evm.model.scaffold00095.14; evm.model.scaffold00011.19; evm.model.scaffold00025.59; evm.model.scaffold00032.4; evm.model.scaffold00032.14; evm.model.scaffold00037.20; evm.model.scaffold00038.54; evm.model.scaffold00054.53; evm.model.scaffold00081.1; evm.model.scaffold00204.7; evm.model.scaffold00262.12; evm.model.scaffold00563.1	Fatty-acid-CoA ligase	6.2.1.3	Fatty acid biosynthesis	Updated reaction
r920	C140COA[c] + MALCOA[c] + 2 NADPH[c] -> C160COA[c] + COA[c] + 2 NADP[c] + CO2[c]	evm.model.scaffold00111.12	evm.model.scaffold00111.12	Fatty-acyl-CoA synthase	2.3.1.86	Fatty acid biosynthesis
r921	C140COA[m] + MALCOA[m] + 2 NADPH[m] -> C160COA[m] + COA[m] + 2 NADP[m] + CO2[m]	evm.model.scaffold00111.12	evm.model.scaffold00111.12	Fatty-acyl-CoA synthase	2.3.1.86	Fatty acid biosynthesis
r922	C160ACP[c] + MALACP[c] -> C18OACP[c] + CO2[c] + ACP[c]	evm.model.scaffold00111.12;evm.model.scaffold00193.18	evm.model.scaffold00111.12;evm.model.scaffold00193.18	Beta-ketoacyl-[acyl-carrier-protein] synthase I	2.3.1.41	Fatty acid biosynthesis
r923	C18OACP[c] + NADPH[c] <=> C18HACP[c] + NADP[c]	evm.model.scaffold00145.13	evm.model.scaffold00145.13	3-oxoacyl-[acyl-carrier-protein] reductase	1.1.1.100	Fatty acid biosynthesis
r924	C18OACP[m] + NADPH[m] <=> C18HACP[m] + NADP[m]	evm.model.scaffold00145.13;evm.model.scaffold00169.20	evm.model.scaffold00145.13;evm.model.scaffold00169.20	3-oxoacyl-[acyl-carrier-protein] reductase	1.1.1.100	Fatty acid biosynthesis
r925	C18HACP[c] <=> C18DACP[c] + H2O[c]	evm.model.scaffold00111.12;evm.model.scaffold00002.57	evm.model.scaffold00111.12;evm.model.scaffold00002.57	3-hydroxyacyl-[acyl-carrier-protein] dehydratase	4.2.1.59	Fatty acid biosynthesis
r926	C18DACP[c] + NADH[c] <=> C180ACP[c] + NAD[c]	evm.model.scaffold00111.12;evm.model.scaffold00002.57	evm.model.scaffold00111.12;evm.model.scaffold00002.57	Acetyl coenzyme A-acyl-carrier-protein transacylase	1.3.1.9	Fatty acid biosynthesis
r927	H2O[c] + C180ACP[c] <=> ACP[c] + C180[c]	evm.model.scaffold00002.57;evm.model.scaffold00111.12	evm.model.scaffold00002.57;evm.model.scaffold00111.12	Acyl-ACP hydrolase	3.1.2.14	Fatty acid biosynthesis
r928	C160COA[c] + MALCOA[c] + 2 NADPH[c] -> C180COA[c] + COA[c] + 2 NADP[c] + CO2[c]	evm.model.scaffold00111.12	evm.model.scaffold00111.12	Fatty-acyl-CoA synthase	2.3.1.86	Fatty acid biosynthesis
r929	C160COA[m] + MALCOA[m] + 2 NADPH[m] -> C180COA[m] + COA[m] + 2 NADP[m] + CO2[m]	evm.model.scaffold00111.12	evm.model.scaffold00111.12	Fatty-acyl-CoA synthase	2.3.1.86	Fatty acid biosynthesis
r930	C160COA[c] + NADH[c] + O2[c] -> C161COA[c] + NAD[c] + 2 H2O[c]	evm.model.scaffold00126.19	evm.model.scaffold00126.19	Delta-9 fatty acid desaturase	1.14.19.1	Fatty acid biosynthesis
r931	C160COA[b] + NADH[b] + O2[b] -> C161COA[b] + NAD[b] + 2 H2O[b]	evm.model.scaffold00126.19; evm.model.scaffold00005.3	evm.model.scaffold00126.19; evm.model.scaffold00005.3	Delta-9 fatty acid desaturase	1.14.19.1	Fatty acid biosynthesis
r932	C180COA[c] + NADH[c] + O2[c] -> C181COA[c] + NAD[c] + 2 H2O[c]	evm.model.scaffold00126.19	evm.model.scaffold00126.19	Delta-9 fatty acid desaturase	1.14.19.1	Fatty acid biosynthesis
r933	C180COA[b] + NADH[b] + O2[b] -> C181COA[b] + NAD[b] + 2 H2O[b]	evm.model.scaffold00126.19; evm.model.scaffold00005.3	evm.model.scaffold00126.19; evm.model.scaffold00005.3	Delta-9 fatty acid desaturase	1.14.19.1	Fatty acid biosynthesis
r934	C181COA[c] + NADH[c] + O2[c] -> C182COA[c] + NAD[c] + 2 H2O[c]	evm.model.scaffold00248.11	evm.model.scaffold00248.11	Delta-12 fatty acid desaturase	1.14.19.6	Fatty acid biosynthesis
r935	C181COA[b] + NADH[b] + O2[b] -> C182COA[b] + NAD[b] + 2 H2O[b]	evm.model.scaffold00248.11	evm.model.scaffold00248.11	Delta-12 fatty acid desaturase	1.14.19.6	Fatty acid biosynthesis
r936	C182COA[c] + NADH[c] + O2[c] -> C183COA[c] + NAD[c] + 2 H2O[c]	evm.model.scaffold00248.11	evm.model.scaffold00248.11	Delta-6 fatty acid desaturase	1.14.19.6	Fatty acid biosynthesis
r937	C182COA[b] + NADH[b] + O2[b] -> C183COA[b] + NAD[b] + 2 H2O[b]	evm.model.scaffold00248.11	evm.model.scaffold00248.11	Delta-6 fatty acid desaturase	1.14.19.6	Fatty acid biosynthesis
r938	ATP[c] + COA[c] + C161[c] -> AMP[c] + PPI[c] + C161COA[c]	evm.model.scaffold00095.14	evm.model.scaffold00095.14	Fatty-acid-CoA ligase	6.2.1.3	Fatty acid biosynthesis
r939	COA[m] + ATP[m] + C161[m] -> PPI[m] + AMP[m] + C161COA[m]	evm.model.scaffold00095.14	evm.model.scaffold00095.14	Fatty-acid-CoA ligase	6.2.1.3	Fatty acid biosynthesis
r940	ATP[b] + COA[b] + C161[b] -> AMP[b] + PPI[b] + C161COA[b]	evm.model.scaffold00081.1	evm.model.scaffold00081.1	Fatty-acid-CoA ligase	6.2.1.3	Fatty acid biosynthesis
r941	ATP[c] + COA[c] + C181[c] -> AMP[c] + PPI[c] + C181COA[c]	evm.model.scaffold00095.14	evm.model.scaffold00095.14	Fatty-acid-CoA ligase	6.2.1.3	Fatty acid biosynthesis
r942	COA[m] + ATP[m] + C181[m] -> PPI[m] + AMP[m] + C181COA[m]	evm.model.scaffold00095.14	evm.model.scaffold00095.14	Fatty-acid-CoA ligase	6.2.1.3	Fatty acid biosynthesis
r943	ATP[b] + COA[b] + C181[b] -> AMP[b] + PPI[b] + C181COA[b]	evm.model.scaffold00081.1	evm.model.scaffold00081.1	Fatty-acid-CoA ligase	6.2.1.3	Fatty acid biosynthesis
r944	ATP[c] + COA[c] + C182[c] -> AMP[c] + PPI[c] + C182COA[c]	evm.model.scaffold00095.14	evm.model.scaffold00095.14	Fatty-acid-CoA ligase	6.2.1.3	Fatty acid biosynthesis
r945	COA[m] + ATP[m] + C182[m] -> PPI[m] + AMP[m] + C182COA[m]	evm.model.scaffold00095.14	evm.model.scaffold00095.14	Fatty-acid-CoA ligase	6.2.1.3	Fatty acid biosynthesis
r946	ATP[b] + COA[b] + C182[b] -> AMP[b] + PPI[b] + C182COA[b]	evm.model.scaffold00081.1	evm.model.scaffold00081.1	Fatty-acid-CoA ligase	6.2.1.3	Fatty acid biosynthesis
r947	ATP[c] + COA[c] + C183[c] -> AMP[c] + PPI[c] + C183COA[c]	evm.model.scaffold00095.14	evm.model.scaffold00095.14	Fatty-acid-CoA ligase	6.2.1.3	Fatty acid biosynthesis
r948	COA[m] + ATP[m] + C183[m] -> PPI[m] + AMP[m] + C183COA[m]	evm.model.scaffold00095.14	evm.model.scaffold00095.14	Fatty-acid-CoA ligase	6.2.1.3	Fatty acid biosynthesis
r949	ATP[b] + COA[b] + C183[b] -> AMP[b] + PPI[b] + C183COA[b]	evm.model.scaffold00081.1	evm.model.scaffold00081.1	Fatty-acid-CoA ligase	6.2.1.3	Fatty acid biosynthesis
r950	0.2720 C160COA[c] + 0.0051 C161COA[c] + 0.0304 C180COA[c] + 0.1534 C181COA[c] + 0.6673 C182COA[c] + 0.0404 C183COA[c] -> FFA[c] + COA[c]	Gap	Gap	Free fatty acids formation		Free fatty acids formation	Updated reaction
r951	C40COA[m] + ACCOA[m] -> COA[m] + C60COA[m]	evm.model.scaffold00073.35	evm.model.scaffold00073.35	Acetyl-CoA C-acyltransferase	2.3.1.16	Fatty acid elongation
r952	NADH[m] + C60COA[m] <=> NAD[m] + C6HCOA[m]	evm.model.scaffold00057.6	evm.model.scaffold00057.6	3-hydroxyacyl-CoA dehydrogenase	1.1.1.35	Fatty acid elongation
r953	C6HCOA[c] <=> C6DCOA[c]	Gap	Gap	Long-chain-enoyl-CoA hydratase	4.2.1.74	Fatty acid elongation
r954	C6HCOA[m] <=> C6DCOA[m]	evm.model.scaffold00329.7	evm.model.scaffold00329.7	Enoyl-CoA hydratase	4.2.1.17	Fatty acid elongation
r955	C6DCOA[m] + NADP[m] -> C60COA[m]+ NADPH[m]	evm.model.scaffold00042.42	evm.model.scaffold00042.42	Trans-2-enoyl-CoA reductase (NADPH)	1.3.1.38	Fatty acid elongation	Updated reaction
r956	C60COA[m] + ACCOA[m] -> COA[m] + C80COA[m]	evm.model.scaffold00073.35	evm.model.scaffold00073.35	Acetyl-CoA C-acyltransferase	2.3.1.16	Fatty acid elongation
r957	NADH[m] + C80COA[m] <=> NAD[m] + C8HCOA[m]	evm.model.scaffold00057.6	evm.model.scaffold00057.6	3-hydroxyacyl-CoA dehydrogenase	1.1.1.35	Fatty acid elongation
r958	C8HCOA[c] <=> C8DCOA[c]	Gap	Gap	Long-chain-enoyl-CoA hydratase	4.2.1.74	Fatty acid elongation
r959	C8HCOA[m] <=> C8DCOA[m]	evm.model.scaffold00329.7	evm.model.scaffold00329.7	Enoyl-CoA hydratase	4.2.1.17	Fatty acid elongation
r960	C8DCOA[m] + NADP[m] -> C80COA[m]+ NADPH[m]	evm.model.scaffold00042.42	evm.model.scaffold00042.42	Trans-2-enoyl-CoA reductase (NADPH)	1.3.1.38	Fatty acid elongation	Updated reaction
r961	C80COA[p] + ACCOA[p] -> COA[p] + C100COA[p]	evm.model.scaffold00073.35	evm.model.scaffold00073.35	Acetyl-CoA C-acyltransferase	2.3.1.16	Fatty acid elongation
r962	NADH[m] + C100COA[m] <=> NAD[m] + C10HCOA[m]	evm.model.scaffold00057.6	evm.model.scaffold00057.6	3-hydroxyacyl-CoA dehydrogenase	1.1.1.35	Fatty acid elongation
r963	C10HCOA[c] <=> C10DCOA[c]	Gap	Gap	Long-chain-enoyl-CoA hydratase	4.2.1.74	Fatty acid elongation
r964	C10HCOA[m] <=> C10DCOA[m]	evm.model.scaffold00329.7	evm.model.scaffold00329.7	Enoyl-CoA hydratase	4.2.1.17	Fatty acid elongation
r965	C10DCOA[m] + NADP[m] -> C100COA[m]+ NADPH[m]	evm.model.scaffold00042.42	evm.model.scaffold00042.42	Trans-2-enoyl-CoA reductase (NADPH)	1.3.1.38	Fatty acid elongation	Updated reaction
r966	C100COA[m] + ACCOA[m] -> COA[m] + C120COA[m]	evm.model.scaffold00073.35	evm.model.scaffold00073.35	Acetyl-CoA C-acyltransferase	2.3.1.16	Fatty acid elongation
r967	NADH[m] + C120COA[m] <=> NAD[m] + C120HCOA[m]	evm.model.scaffold00057.6	evm.model.scaffold00057.6	3-hydroxyacyl-CoA dehydrogenase	1.1.1.35	Fatty acid elongation
r968	C120HCOA[c] <=> C120DCOA[c]	Gap	Gap	long-chain-enoyl-CoA hydratase	4.2.1.74	Fatty acid elongation
r969	C120HCOA[m] <=> C120DCOA[m]	evm.model.scaffold00329.7	evm.model.scaffold00329.7	Enoyl-CoA hydratase	4.2.1.17	Fatty acid elongation
r970	C120DCOA[m] + NADP[m] -> C120COA[m]+ NADPH[m]	evm.model.scaffold00042.42	evm.model.scaffold00042.42	Trans-2-enoyl-CoA reductase (NADPH)	1.3.1.38	Fatty acid elongation	Updated reaction
r971	C120COA[m] + ACCOA[m] -> COA[m] + C140COA[m]	evm.model.scaffold00073.35	evm.model.scaffold00073.35	Acetyl-CoA C-acyltransferase	2.3.1.16	Fatty acid elongation
r972	NADH[m] + C140COA[m] <=> NAD[m] + C140HCOA[m]	evm.model.scaffold00057.6	evm.model.scaffold00057.6	3-hydroxyacyl-CoA dehydrogenase	1.1.1.35	Fatty acid elongation
r973	C140HCOA[c] <=> C140DCOA[c]	Gap	Gap	long-chain-enoyl-CoA hydratase	4.2.1.74	Fatty acid elongation
r974	C140HCOA[m] <=> C140DCOA[m]	evm.model.scaffold00329.7	evm.model.scaffold00329.7	Enoyl-CoA hydratase	4.2.1.17	Fatty acid elongation
r975	C140DCOA[m] + NADP[m] -> C140COA[m]+ NADPH[m]	evm.model.scaffold00042.42	evm.model.scaffold00042.42	Trans-2-enoyl-CoA reductase (NADPH)	1.3.1.38	Fatty acid elongation	Updated reaction
r976	C140COA[p] + ACCOA[p] -> COA[p] + C160COA[p]	evm.model.scaffold00073.35	evm.model.scaffold00073.35	Acetyl-CoA C-acyltransferase	2.3.1.16	Fatty acid elongation
r977	NADH[m] + C160COA[m] <=> NAD[m] + C160HCOA[m]	evm.model.scaffold00057.6	evm.model.scaffold00057.6	3-hydroxyacyl-CoA dehydrogenase	1.1.1.35	Fatty acid elongation
r978	C160HCOA[c] <=> C160DCOA[c]	Gap	Gap	long-chain-enoyl-CoA hydratase	4.2.1.74	Fatty acid elongation
r979	C160HCOA[m] <=> C160DCOA[m]	evm.model.scaffold00329.7	evm.model.scaffold00329.7	Enoyl-CoA hydratase	4.2.1.17	Fatty acid elongation
r980	C160DCOA[m] + NADP[m] -> C160COA[m]+ NADPH[m]	evm.model.scaffold00042.42	evm.model.scaffold00042.42	Trans-2-enoyl-CoA reductase (NADPH)	1.3.1.38	Fatty acid elongation	Updated reaction
r981	C160COA[c] + H2O[c] -> C160[c] + COA[c]	evm.model.scaffold00126.23	evm.model.scaffold00126.23	Palmitoyl[protein] hydrolase	3.1.2.22	Fatty acid elongation
r982	C160COA[c] + MALCOA[c] -> COA[c] + CO2[c] + C180COA[c]	evm.model.scaffold00211.14;evm.model.scaffold00104.9	evm.model.scaffold00211.14;evm.model.scaffold00104.9	Fatty acid elongase	2.3.1.199	Fatty acid elongation
r983	C120COA[c] + CAR[c] <=> C120CAR[c] + COA[c]	evm.model.scaffold00003.58;evm.model.scaffold00058.28; evm.model.scaffold00095.11; evm.model.scaffold00112.11	evm.model.scaffold00003.58;evm.model.scaffold00058.28; evm.model.scaffold00095.11; evm.model.scaffold00112.11	Carnitine O-acetyltransferase	2.3.1.7	Carnitine shuttle
r984	C120COA[m] + CAR[m] <=> C120CAR[m] + COA[m]	evm.model.scaffold00003.58;evm.model.scaffold00058.28	evm.model.scaffold00003.58;evm.model.scaffold00058.28	Carnitine O-acetyltransferase	2.3.1.7	Carnitine shuttle
r985	C120COA[b] + CAR[b] <=> C120CAR[b] + COA[b]	evm.model.scaffold00084.9	evm.model.scaffold00084.9	Carnitine O-acetyltransferase	2.3.1.7	Carnitine shuttle
r986	C120CAR[c] + CAR[m] <=> C120CAR[m] + CAR[c]			Carnitine transport reaction		Carnitine shuttle
r987	C120CAR[m] + COA[m] <=> C120COA[m] + CAR[m]	evm.model.scaffold00003.58;evm.model.scaffold00058.28	evm.model.scaffold00003.58;evm.model.scaffold00058.28	Carnitine O-acetyltransferase	2.3.1.7	Carnitine shuttle
r988	C140COA[c] + CAR[c] <=> C140CAR[c] + COA[c]	evm.model.scaffold00003.58;evm.model.scaffold00058.28; evm.model.scaffold00095.11; evm.model.scaffold00112.11	evm.model.scaffold00003.58;evm.model.scaffold00058.28; evm.model.scaffold00095.11; evm.model.scaffold00112.11	Carnitine O-acetyltransferase	2.3.1.7	Carnitine shuttle
r989	C140CAR[c] + CAR[m] <=> C140CAR[m] + CAR[c]			Carnitine transport reaction		Carnitine shuttle
r990	C140CAR[m] + COA[m] <=> C140COA[m] + CAR[m]	evm.model.scaffold00003.58;evm.model.scaffold00058.28	evm.model.scaffold00003.58;evm.model.scaffold00058.28	Carnitine O-acetyltransferase	2.3.1.7	Carnitine shuttle
r991	C160COA[c] + CAR[c] <=> C160CAR[c] + COA[c]	evm.model.scaffold00094.2	evm.model.scaffold00094.2	Carnitine O-palmitoyltransferase	2.3.1.21	Carnitine shuttle
r992	C160CAR[c] + CAR[m] <=> C160CAR[m] + CAR[c]			Carnitine transport reaction		Carnitine shuttle
r993	C160CAR[m] + COA[m] <=> C160COA[m] + CAR[m]	evm.model.scaffold00094.2	evm.model.scaffold00094.2	Carnitine O-palmitoyltransferase	2.3.1.21	Carnitine shuttle
r994	C180COA[c] + CAR[c] <=> C180CAR[c] + COA[c]	evm.model.scaffold00003.58;evm.model.scaffold00058.28	evm.model.scaffold00003.58;evm.model.scaffold00058.28	Carnitine O-acetyltransferase	2.3.1.7	Carnitine shuttle
r995	C180CAR[c] + CAR[m] <=> C180CAR[m] + CAR[c]			Carnitine transport reaction		Carnitine shuttle
r996	C180CAR[m] + COA[m] <=> C180COA[m] + CAR[m]	evm.model.scaffold00003.58;evm.model.scaffold00058.28	evm.model.scaffold00003.58;evm.model.scaffold00058.28	Carnitine O-acetyltransferase	2.3.1.7	Carnitine shuttle
r997	C160ACP[c] + COA[c] <=> C160COA[c] + ACP[c]	evm.model.scaffold00002.57;evm.model.scaffold00111.12	evm.model.scaffold00002.57;evm.model.scaffold00111.12	ACP-acetyltransferase	2.3.1.38	Transfer of ACP-Acyls to COA for transport and biosynthesis
r998	C180ACP[c] + COA[c] <=> C180COA[c] + ACP[c]	evm.model.scaffold00002.57;evm.model.scaffold00111.12	evm.model.scaffold00002.57;evm.model.scaffold00111.12	ACP-acetyltransferase	2.3.1.38	Transfer of ACP-Acyls to COA for transport and biosynthesis
r999	O2[b] + C160COA[b] -> H2O2[b] + C16DCOA[b]	evm.model.scaffold00029.41	evm.model.scaffold00029.41	Acyl-CoA oxidase	1.3.3.6	Fatty acid oxidation
r1000	O2[c] + C160COA[c] -> H2O2[c] + C16DCOA[c]	evm.model.scaffold00221.20; evm.model.scaffold00025.39; evm.model.scaffold00115.6; evm.model.scaffold00417.1; evm.model.scaffold00256.9	evm.model.scaffold00221.20; evm.model.scaffold00025.39; evm.model.scaffold00115.6; evm.model.scaffold00417.1; evm.model.scaffold00256.9	Acyl-CoA oxidase	1.3.3.6	Fatty acid oxidation
r1001	O2[p] + C160COA[p] -> H2O2[p] + C16DCOA[p]	evm.model.scaffold00221.20; evm.model.scaffold00573.1; evm.model.scaffold00063.5; evm.model.scaffold00118.5	evm.model.scaffold00221.20; evm.model.scaffold00573.1; evm.model.scaffold00063.5; evm.model.scaffold00118.5	Acyl-CoA oxidase	1.3.3.6	Fatty acid oxidation
r1002	O2[m] + C160COA[m] -> H2O2[m] + C16DCOA[m]	evm.model.scaffold00573.1; evm.model.scaffold00063.5; evm.model.scaffold00118.5	evm.model.scaffold00573.1; evm.model.scaffold00063.5; evm.model.scaffold00118.5	Acyl-CoA oxidase	1.3.3.6	Fatty acid oxidation
r1003	FAD[m] + C160COA[c] -> FADH2[m] + C16DCOA[c]	evm.model.scaffold00068.17; evm.model.scaffold00267.13	evm.model.scaffold00068.17; evm.model.scaffold00267.13	Medium-chain acyl-CoA dehydrogenase	1.3.8.7	Fatty acid oxidation
r1004	C16HCOA[c] <=> C16DCOA[c]	Gap	Gap	Long-chain-enoyl-CoA hydratase	4.2.1.74	Fatty acid oxidation
r1005	C16HCOA[m] <=> C16DCOA[m]	evm.model.scaffold00329.7	evm.model.scaffold00329.7	Enoyl-CoA hydratase	4.2.1.17	Fatty acid oxidation
r1006	NADH[m] + C16OCOA[m] <=> NAD[m] + C16HCOA[m]	evm.model.scaffold00057.6	evm.model.scaffold00057.6	3-hydroxyacyl-CoA dehydrogenase	1.1.1.35	Fatty acid oxidation
r1007	COA[p] + C16OCOA[p] <=> ACCOA[p] + C140COA[p]	evm.model.scaffold00073.35	evm.model.scaffold00073.35	Acetyl-CoA C-acyltransferase	2.3.1.16	Fatty acid oxidation
r1008	COA[m] + C16OCOA[m] <=> ACCOA[m] + C140COA[m]	evm.model.scaffold00049.24	evm.model.scaffold00049.24	Acetyl-CoA C-acyltransferase	2.3.1.16	Fatty acid oxidation
r1009	O2[m] + C140COA[m] -> H2O2[m] + C14DCOA[m]	evm.model.scaffold00573.1	evm.model.scaffold00573.1	Acyl-CoA oxidase	1.3.3.6	Fatty acid oxidation
r1010	O2[p] + C140COA[p] -> H2O2[p] + C14DCOA[p]	evm.model.scaffold00573.1	evm.model.scaffold00573.1	Acyl-CoA oxidase	1.3.3.6	Fatty acid oxidation
r1011	O2[c] + C140COA[c] -> H2O2[c] + C14DCOA[c]	evm.model.scaffold00025.39	evm.model.scaffold00025.39	Acyl-CoA oxidase	1.3.3.6	Fatty acid oxidation
r1012	O2[b] + C140COA[b] -> H2O2[b] + C14DCOA[b]	evm.model.scaffold00029.41	evm.model.scaffold00029.41	Acyl-CoA oxidase	1.3.3.6	Fatty acid oxidation
r1013	FAD[m] + C140COA[c] -> FADH2[m] + C14DCOA[c]	evm.model.scaffold00068.17	evm.model.scaffold00068.17	Medium-chain acyl-CoA dehydrogenase	1.3.8.7	Fatty acid oxidation
r1014	C14HCOA[c] <=> C14DCOA[c]	Gap	Gap	Long-chain-enoyl-CoA hydratase	4.2.1.74	Fatty acid oxidation
r1015	C14HCOA[c] <=> C14DCOA[c]	evm.model.scaffold00245.4	evm.model.scaffold00245.4	Enoyl-CoA hydratase	4.2.1.17	Fatty acid oxidation
r1016	C14HCOA[m] <=> C14DCOA[m]	evm.model.scaffold00329.7	evm.model.scaffold00329.7	Enoyl-CoA hydratase	4.2.1.17	Fatty acid oxidation
r1017	NADH[m] + C14OCOA[m] <=> NAD[m] + C14HCOA[m]	evm.model.scaffold00057.6	evm.model.scaffold00057.6	3-hydroxyacyl-CoA dehydrogenase	1.1.1.35	Fatty acid oxidation
r1018	COA[p] + C14OCOA[p] <=> ACCOA[p] + C120COA[p]	evm.model.scaffold00073.35	evm.model.scaffold00073.35	Acetyl-CoA C-acyltransferase	2.3.1.16	Fatty acid oxidation
r1019	COA[m] + C14OCOA[m] <=> ACCOA[m] + C120COA[m]	evm.model.scaffold00049.24	evm.model.scaffold00049.24	Acetyl-CoA C-acyltransferase	2.3.1.16	Fatty acid oxidation
r1020	O2[m] + C120COA[m] -> H2O2[m] + C12DCOA[m]	evm.model.scaffold00573.1	evm.model.scaffold00573.1	Acyl-CoA oxidase	1.3.3.6	Fatty acid oxidation
r1021	O2[p] + C120COA[p] -> H2O2[p] + C12DCOA[p]	evm.model.scaffold00573.1	evm.model.scaffold00573.1	Acyl-CoA oxidase	1.3.3.6	Fatty acid oxidation
r1022	O2[c] + C120COA[c] -> H2O2[c] + C12DCOA[c]	evm.model.scaffold00025.39	evm.model.scaffold00025.39	Acyl-CoA oxidase	1.3.3.6	Fatty acid oxidation
r1023	O2[b] + C120COA[b] -> H2O2[b] + C12DCOA[b]	evm.model.scaffold00029.41	evm.model.scaffold00029.41	Acyl-CoA oxidase	1.3.3.6	Fatty acid oxidation
r1024	FAD[m] + C120COA[c] -> FADH2[m] + C12DCOA[c]	evm.model.scaffold00068.17; evm.model.scaffold00267.13; evm.model.scaffold00012.37	evm.model.scaffold00068.17; evm.model.scaffold00267.13; evm.model.scaffold00012.37	Medium-chain acyl-CoA dehydrogenase	1.3.8.7	Fatty acid oxidation
r1025	C12HCOA[c] <=> C12DCOA[c]	Gap	Gap	Long-chain-enoyl-CoA hydratase	4.2.1.74	Fatty acid oxidation
r1026	C12HCOA[c] <=> C12DCOA[c]	evm.model.scaffold00245.4	evm.model.scaffold00245.4	Enoyl-CoA hydratase	4.2.1.17	Fatty acid oxidation
r1027	C12HCOA[m] <=> C12DCOA[m]	evm.model.scaffold00329.7	evm.model.scaffold00329.7	Enoyl-CoA hydratase	4.2.1.17	Fatty acid oxidation
r1028	NADH[m] + C12OCOA[m] <=> NAD[m] + C12HCOA[m]	evm.model.scaffold00057.6	evm.model.scaffold00057.6	3-hydroxyacyl-CoA dehydrogenase	1.1.1.35	Fatty acid oxidation
r1029	COA[p] + C12OCOA[p] <=> ACCOA[p] + C100COA[p]	evm.model.scaffold00073.35	evm.model.scaffold00073.35	Acetyl-CoA C-acyltransferase	2.3.1.16	Fatty acid oxidation
r1030	COA[m] + C12OCOA[m] <=> ACCOA[m] + C100COA[m]	evm.model.scaffold00049.24	evm.model.scaffold00049.24	Acetyl-CoA C-acyltransferase	2.3.1.16	Fatty acid oxidation
r1031	C12DCOA[m] <=> C12CCOA[m]	evm.model.scaffold00018.36	evm.model.scaffold00018.36	Dodecenoyl-CoA isomerase	5.3.3.8	Fatty acid oxidation
r1032	O2[m] + C100COA[m] -> H2O2[m] + C10DCOA[m]	evm.model.scaffold00573.1	evm.model.scaffold00573.1	Acyl-CoA oxidase	1.3.3.6	Fatty acid oxidation
r1033	O2[p] + C100COA[p] -> H2O2[p] + C10DCOA[p]	evm.model.scaffold00573.1	evm.model.scaffold00573.1	Acyl-CoA oxidase	1.3.3.6	Fatty acid oxidation
r1034	O2[c] + C100COA[c] -> H2O2[c] + C10DCOA[c]	evm.model.scaffold00025.39	evm.model.scaffold00025.39	Acyl-CoA oxidase	1.3.3.6	Fatty acid oxidation
r1035	O2[b] + C100COA[b] -> H2O2[b] + C10DCOA[b]	evm.model.scaffold00029.41	evm.model.scaffold00029.41	Acyl-CoA oxidase	1.3.3.6	Fatty acid oxidation
r1036	FAD[m] + C100COA[c] -> FADH2[m] + C10DCOA[c]	evm.model.scaffold00068.17; evm.model.scaffold00267.13; evm.model.scaffold00012.37	evm.model.scaffold00068.17; evm.model.scaffold00267.13; evm.model.scaffold00012.37	Medium-chain acyl-CoA dehydrogenase	1.3.8.7	Fatty acid oxidation
r1037	C10HCOA[c] <=> C10DCOA[c]	Gap	Gap	Long-chain-enoyl-CoA hydratase	4.2.1.74	Fatty acid oxidation
r1038	C10HCOA[m] <=> C10DCOA[m]	evm.model.scaffold00329.7	evm.model.scaffold00329.7	Enoyl-CoA hydratase	4.2.1.17	Fatty acid oxidation
r1039	NADH[m] + C10OCOA[m] <=> NAD[m] + C10HCOA[m]	evm.model.scaffold00057.6	evm.model.scaffold00057.6	3-hydroxyacyl-CoA dehydrogenase	1.1.1.35	Fatty acid oxidation
r1040	COA[p] + C10OCOA[p] <=> ACCOA[p] + C80COA[p]	evm.model.scaffold00073.35	evm.model.scaffold00073.35	Acetyl-CoA C-acyltransferase	2.3.1.16	Fatty acid oxidation
r1041	COA[m] + C10OCOA[m] <=> ACCOA[m] + C80COA[m]	evm.model.scaffold00049.24	evm.model.scaffold00049.24	Acetyl-CoA C-acyltransferase	2.3.1.16	Fatty acid oxidation
r1042	O2[m] + C80COA[m] -> H2O2[m] + C8DCOA[m]	evm.model.scaffold00573.1	evm.model.scaffold00573.1	Acyl-CoA oxidase	1.3.3.6	Fatty acid oxidation
r1043	O2[p] + C80COA[p] -> H2O2[p] + C8DCOA[p]	evm.model.scaffold00573.1	evm.model.scaffold00573.1	Acyl-CoA oxidase	1.3.3.6	Fatty acid oxidation
r1044	O2[c] + C80COA[c] -> H2O2[c] + C8DCOA[c]	evm.model.scaffold00025.39	evm.model.scaffold00025.39	Acyl-CoA oxidase	1.3.3.6	Fatty acid oxidation
r1045	O2[b] + C80COA[b] -> H2O2[b] + C8DCOA[b]	evm.model.scaffold00029.41	evm.model.scaffold00029.41	Acyl-CoA oxidase	1.3.3.6	Fatty acid oxidation
r1046	FAD[m] + C80COA[c] -> FADH2[m] + C8DCOA[c]	evm.model.scaffold00068.17; evm.model.scaffold00267.13; evm.model.scaffold00012.37	evm.model.scaffold00068.17; evm.model.scaffold00267.13; evm.model.scaffold00012.37	Medium-chain acyl-CoA dehydrogenase	1.3.8.7	Fatty acid oxidation
r1047	C8HCOA[c] <=> C8DCOA[c]	Gap	Gap	Long-chain-enoyl-CoA hydratase	4.2.1.74	Fatty acid oxidation
r1048	C8HCOA[m] <=> C8DCOA[m]	evm.model.scaffold00329.7	evm.model.scaffold00329.7	Enoyl-CoA hydratase	4.2.1.17	Fatty acid oxidation
r1049	NADH[m] + C8OCOA[m] <=> NAD[m] + C8HCOA[m]	evm.model.scaffold00057.6	evm.model.scaffold00057.6	3-hydroxyacyl-CoA dehydrogenase	1.1.1.35	Fatty acid oxidation
r1050	COA[p] + C8OCOA[p] <=> ACCOA[p] + C60COA[p]	evm.model.scaffold00073.35	evm.model.scaffold00073.35	Acetyl-CoA C-acyltransferase	2.3.1.16	Fatty acid oxidation
r1051	COA[m] + C8OCOA[m] <=> ACCOA[m] + C60COA[m]	evm.model.scaffold00049.24	evm.model.scaffold00049.24	Acetyl-CoA C-acyltransferase	2.3.1.16	Fatty acid oxidation
r1052	O2[m] + C60COA[m] -> H2O2[m] + C6HCOA[m]	evm.model.scaffold00573.1	evm.model.scaffold00573.1	Acyl-CoA oxidase	1.3.3.6	Fatty acid oxidation
r1053	O2[p] + C60COA[p] -> H2O2[p] + C6HCOA[p]	evm.model.scaffold00573.1	evm.model.scaffold00573.1	Acyl-CoA oxidase	1.3.3.6	Fatty acid oxidation
r1054	O2[c] + C60COA[c] -> H2O2[c] + C6DCOA[c]	evm.model.scaffold00025.39	evm.model.scaffold00025.39	Acyl-CoA oxidase	1.3.3.6	Fatty acid oxidation
r1055	O2[b] + C60COA[b] -> H2O2[b] + C6DCOA[b]	evm.model.scaffold00029.41	evm.model.scaffold00029.41	Acyl-CoA oxidase	1.3.3.6	Fatty acid oxidation
r1056	FAD[m] + C60COA[c] -> FADH2[m] + C6DCOA[c]	evm.model.scaffold00068.17; evm.model.scaffold00267.13; evm.model.scaffold00012.37	evm.model.scaffold00068.17; evm.model.scaffold00267.13; evm.model.scaffold00012.37	Medium-chain acyl-CoA dehydrogenase	1.3.8.7	Fatty acid oxidation
r1057	C6HCOA[c] <=> C6DCOA[c]	Gap	Gap	Long-chain-enoyl-CoA hydratase	4.2.1.74	Fatty acid oxidation
r1058	C6HCOA[m] <=> C6DCOA[m]	evm.model.scaffold00329.7	evm.model.scaffold00329.7	Enoyl-CoA hydratase	4.2.1.17	Fatty acid oxidation
r1059	NADH[m] + C6OCOA[m] <=> NAD[m] + C6HCOA[m]	evm.model.scaffold00057.6	evm.model.scaffold00057.6	3-hydroxyacyl-CoA dehydrogenase	1.1.1.35	Fatty acid oxidation
r1060	COA[p] + C6OCOA[p] <=> ACCOA[p] + C40COA[p]	evm.model.scaffold00073.35	evm.model.scaffold00073.35	Acetyl-CoA C-acyltransferase	2.3.1.16	Fatty acid oxidation
r1061	COA[m] + C6OCOA[m] <=> ACCOA[m] + C40COA[m]	evm.model.scaffold00049.24	evm.model.scaffold00049.24	Acetyl-CoA C-acyltransferase	2.3.1.16	Fatty acid oxidation
r1062	O2[m] + C40COA[m] -> H2O2[m] + C4HCOA[m]	evm.model.scaffold00573.1	evm.model.scaffold00573.1	Acyl-CoA oxidase	1.3.3.6	Fatty acid oxidation
r1063	O2[p] + C40COA[p] -> H2O2[p] + C4HCOA[p]	evm.model.scaffold00573.1	evm.model.scaffold00573.1	Acyl-CoA oxidase	1.3.3.6	Fatty acid oxidation
r1064	O2[c] + C40COA[c] -> H2O2[c] + C4DCOA[c]	evm.model.scaffold00025.39	evm.model.scaffold00025.39	Acyl-CoA oxidase	1.3.3.6	Fatty acid oxidation
r1065	O2[b] + C40COA[b] -> H2O2[b] + C4HCOA[b]	evm.model.scaffold00029.41	evm.model.scaffold00029.41	Acyl-CoA oxidase	1.3.3.6	Fatty acid oxidation
r1066	FAD[m] + C40COA[c] -> FADH2[m] + C4DCOA[c]	evm.model.scaffold00068.17; evm.model.scaffold00267.13; evm.model.scaffold00012.37	evm.model.scaffold00068.17; evm.model.scaffold00267.13; evm.model.scaffold00012.37	Medium-chain acyl-CoA dehydrogenase	1.3.8.7	Fatty acid oxidation
r1067	GLTCOA[m] + FAD[m] -> C4DCOA[m] + CO2[m] + FADH2[m]	evm.model.scaffold00136.10	evm.model.scaffold00136.10	Glutaryl-CoA dehydrogenase (ETF)	1.3.8.6	Fatty acid oxidation
r1068	C4HCOA[m] <=> C4DCOA[m]	evm.model.scaffold00329.7	evm.model.scaffold00329.7	Enoyl-CoA hydratase	4.2.1.17	Fatty acid oxidation
r1069	C4HCOA[c] <=> C4DCOA[c]	evm.model.scaffold00329.7	evm.model.scaffold00329.7	Enoyl-CoA hydratase	4.2.1.17	Fatty acid oxidation
r1070	NADH[m] + AACCOA[m] <=> NAD[m] + C4HCOA[m]	evm.model.scaffold00057.6	evm.model.scaffold00057.6	3-hydroxyacyl-CoA dehydrogenase	1.1.1.35	Fatty acid oxidation
r1071	COA[p] + AACCOA[p] <=> 2 ACCOA[p]	evm.model.scaffold00265.8	evm.model.scaffold00265.8	Acetoacetyl-CoA thiolase	2.3.1.9	Fatty acid oxidation
r1072	COA[m] + AACCOA[m] <=> 2 ACCOA[m]	evm.model.scaffold00265.8	evm.model.scaffold00265.8	Acetoacetyl-CoA thiolase	2.3.1.9	Fatty acid oxidation
r1073	COA[c] + AACCOA[c] <=> 2 ACCOA[c]	evm.model.scaffold00119.26;evm.model.scaffold00149.8	evm.model.scaffold00119.26;evm.model.scaffold00149.8	Acetoacetyl-CoA thiolase	2.3.1.9	Fatty acid oxidation
r1074	2 ACCOA[m] <=> COA[m] + AACCOA[m]	evm.model.scaffold00049.24	evm.model.scaffold00049.24	Acetoacetyl-CoA thiolase	2.3.1.9	Fatty acid oxidation
r1075	LEUKA[c] + H2O[c] -> LEUKB[c]	evm.model.scaffold00141.8; evm.model.scaffold00336.3	evm.model.scaffold00141.8; evm.model.scaffold00336.3	Leukotriene-A4 hydrolase	3.3.2.6	Arachidonic acid metabolism
r1076	NAD[m] + METTHF[m] -> NADH[m] + METHF[m]	evm.model.scaffold00131.5	evm.model.scaffold00131.5	Methylenetetrahydrofolate dehydrogenase (NAD)	1.5.1.15	Folate biosynthesis
r1077	NAD[c] + METTHF[c] -> NADH[c] + METHF[c]	evm.model.scaffold00131.5	evm.model.scaffold00131.5	Methylenetetrahydrofolate dehydrogenase (NAD)	1.5.1.15	Folate biosynthesis
r1078	ATP[c] + FOR[c] + THF[c] -> ADP[c] + PI[c] + FTHF[c]	evm.model.scaffold00018.40; evm.model.scaffold00086.10	evm.model.scaffold00018.40; evm.model.scaffold00086.10	Formate-tetrahydrofolate ligase	6.3.4.3	Folate biosynthesis
r1079	ATP[c] + GLU[c] + THF[c] <=> ADP[c] + PI[c] + THFG[c]	evm.model.scaffold00199.14	evm.model.scaffold00199.14	Folylpolyglutamate synthetase	6.3.2.17	Folate biosynthesis
r1080	ATP[m] + GLU[m] + THF[m] <=> PI[m] + ADP[m] + THFG[m]	evm.model.scaffold00199.14	evm.model.scaffold00199.14	Folylpolyglutamate synthetase	6.3.2.17	Folate biosynthesis
r1081	GTP[c] -> FOR[c] + AHTD[c]	evm.model.scaffold00011.25	evm.model.scaffold00011.25	GTP cyclohydrolase I	3.5.4.16	Folate biosynthesis
r1082	AHTD[c] -> 3 PI[c] + PYVYLTRIN[c]	evm.model.scaffold00009.71	evm.model.scaffold00009.71	6-pyruvoyl tetrahydrobiopterin synthase	4.2.3.12	Folate biosynthesis
r1083	AHTD[m] -> 3 PI[m] + PYVYLTRIN[m]	evm.model.scaffold00009.71	evm.model.scaffold00009.71	6-pyruvoyl tetrahydrobiopterin synthase	4.2.3.12	Folate biosynthesis
r1084	2 NADPH[c] + PYVYLTRIN[c] -> 2 NADP[c] + THBOPRIN[c]	evm.model.scaffold00019.52	evm.model.scaffold00019.52	Sepiapterin reductase	1.1.1.153	Folate biosynthesis
r1085	NADP[c] + THBOPRIN[c] -> NADPH[c] + DHBOPRIN[c]	evm.model.scaffold00043.53	evm.model.scaffold00043.53	Dihydropteridine reductase	1.5.1.34	Folate biosynthesis
r1086	GLN[c] + CHOR[c] -> GLU[c] + ADCHOR[c]	evm.model.scaffold00025.55	evm.model.scaffold00025.55	Para-aminobenzoate synthetase	2.6.1.85	Folate biosynthesis
r1087	PABA[c] + AHHMD[c] -> PPI[c] + DHPT[c]	evm.model.scaffold00315.3	evm.model.scaffold00315.3	Dihydropteroate synthase	2.5.1.15	Folate biosynthesis
r1088	PABA[c] + AHHMP[c] -> DHPT[c]	evm.model.scaffold00315.3	evm.model.scaffold00315.3	Dihydropteroate synthase	2.5.1.15	Folate biosynthesis
r1089	ATP[c] + GLU[c] + DHPT[c] -> ADP[c] + PI[c] + DHF[c]	evm.model.scaffold00056.11	evm.model.scaffold00056.11	Dihydrofolate synthase; Folylpolyglutamate synthase	6.3.2.12; 6.3.2.17	Folate biosynthesis
r1090	ATP[m] + GLU[m] + DHPT[m] -> PI[m] + ADP[m] + DHF[m]	evm.model.scaffold00056.11	evm.model.scaffold00056.11	Dihydrofolate synthase; Folylpolyglutamate synthase	6.3.2.12; 6.3.2.17	Folate biosynthesis
r1091	NADPH[m] + DHF[m] -> NADP[m] + THF[m]	evm.model.scaffold00086.29;evm.model.scaffold00293.14	evm.model.scaffold00086.29;evm.model.scaffold00293.14	Dihydrofolate reductase	1.5.1.3	Folate biosynthesis
r1092	NADPH[c] + DHF[c] -> NADP[c] + THF[c]	evm.model.scaffold00293.14;evm.model.scaffold00007.76;evm.model.scaffold00026.33;evm.model.scaffold00086.29	evm.model.scaffold00293.14;evm.model.scaffold00007.76;evm.model.scaffold00026.33;evm.model.scaffold00086.29	Dihydrofolate reductase	1.5.1.3	Folate biosynthesis
r1093	H2O[m] + LMETTRNA[m] + FTHF[m] -> THF[m] + FOFMET[m]	evm.model.scaffold00137.20	evm.model.scaffold00137.20	Methionyl-tRNA formyltransferase	2.1.2.9	Folate biosynthesis
r1094	H2O[c] + LMETTRNA[c] + FTHF[c] -> THF[c] + FOFMET[c]	evm.model.scaffold00137.20	evm.model.scaffold00137.20	Methionyl-tRNA formyltransferase	2.1.2.9	Folate biosynthesis
r1095	NADPH[c] + METTHF[c] -> NADP[c] + MTHF[c]	evm.model.scaffold00019.16;evm.model.scaffold00094.11;evm.model.scaffold00026.14	evm.model.scaffold00019.16;evm.model.scaffold00094.11;evm.model.scaffold00026.14	Methylenetetrahydrofolate reductase	1.5.1.20	Folate biosynthesis
r1096	ATP[c] + FTHF[c] -> ADP[c] + PI[c] + MTHF[c]	evm.model.scaffold00189.15	evm.model.scaffold00189.15	5-formyltetrahydrofolate cyclo-ligase	6.3.3.2	Folate biosynthesis
r1097	AHHMP[c] + ATP[c] -> AMP[c] + AHHMD[c]	evm.model.scaffold00315.3	evm.model.scaffold00315.3	2-amino-4-hydroxy-6-hydroxymethyldihydropteridine diphosphokinase	2.7.6.3	Folate biosynthesis
r1098	DHP[c] -> AHHMP[c] + GLAL[c]	evm.model.scaffold00315.3	evm.model.scaffold00315.3	Dihydroneopterin aldolase	4.1.2.25	Folate biosynthesis
r1099	ATP[b] + MODO[b] -> PPI[b] + ADMODO[b]	evm.model.scaffold00020.22	evm.model.scaffold00020.22	Molybdopterin adenylyltransferase	2.7.7.75	Folate biosynthesis
r1100	ATP[c] + MODO[c] -> PPI[c] + ADMODO[c]	evm.model.scaffold00020.22	evm.model.scaffold00020.22	Molybdopterin adenylyltransferase	2.7.7.75	Folate biosynthesis
r1101	ADMODO[b] + MODA[b] -> MODECO[b] + AMP[b]+ H2O [b]	evm.model.scaffold00020.22	evm.model.scaffold00020.22	Molybdopterin molybdotransferase	2.10.1.1	Folate biosynthesis	Updated reaction
r1102	ADMODO[c] + MODA[c] -> MODECO[c] + AMP[c] + H2O[c]	evm.model.scaffold00020.22	evm.model.scaffold00020.22	Molybdopterin molybdotransferase	2.10.1.1	Folate biosynthesis
r1103	ATP[c] + NADPH[c] + FOR[c] + THF[c] -> ADP[c] + PI[c] + NADP[c] + METTHF[c]	evm.model.scaffold00018.40: evm.model.scaffold00086.10	evm.model.scaffold00018.40: evm.model.scaffold00086.10	Methylenetetrahydrofolate dehydrogenase (NADP); Methenyltetrahydrofolate cyclohydrolase; Formyltetrahydrofolatesynthetase	1.5.1.5; 3.5.4.9; 6.3.4.3	One carbon pool by folate
r1104	METTHF[m] + OIVAL[m] -> THF[m] + AKP[m]	evm.model.scaffold00057.19	evm.model.scaffold00057.19	3-methyl-2-oxobutaate hydroxymethyltransferase	2.1.2.11	Coenzyme A and pantothenate biosynthesis
r1105	NADPH[c] + AKP[c] -> NADP[c] + PANT[c]	evm.model.scaffold00121.18; evm.model.scaffold00239.16	evm.model.scaffold00121.18; evm.model.scaffold00239.16	2-dehydropantoate 2-reductase	1.1.1.169	Coenzyme A and pantothenate biosynthesis
r1106	NADPH[m] + AKP[m] -> NADP[m] + PANT[m]	evm.model.scaffold00313.9; evm.model.scaffold00239.16	evm.model.scaffold00313.9; evm.model.scaffold00239.16	Ketol-acid reductoisomerase	1.1.1.86	Coenzyme A and pantothenate biosynthesis
r1107	ATP[m] + PANT[m] + bALA[m] -> PPI[m] + AMP[m] + PNTO[m]	evm.model.scaffold00030.31	evm.model.scaffold00030.31	Pantoate-beta-alanine ligase	6.3.2.1	Coenzyme A and pantothenate biosynthesis
r1108	ATP[c] + PNTO[c] -> ADP[c] + 4PPNTO[c]	evm.model.scaffold00002.4; evm.model.scaffold00592.1; evm.model.scaffold00206.1	evm.model.scaffold00002.4; evm.model.scaffold00592.1; evm.model.scaffold00206.1	Pantothenate kinase	2.7.1.33	Coenzyme A and pantothenate biosynthesis
r1109	CYS[c] + CTP[c] + 4PPNTO[c] -> PPI[c] + CMP[c] + 4PPNCYS[c]	evm.model.scaffold00286.17;evm.model.scaffold00286.15	evm.model.scaffold00286.17;evm.model.scaffold00286.15	Phosphopantothenate-cysteine ligase	6.3.2.5	Coenzyme A and pantothenate biosynthesis
r1110	4PPNCYS[c] -> CO2[c] + 4PPNTE[c]	Gap	Gap	Phosphopantothenoylcysteine decarboxylase	4.1.1.36	Coenzyme A and pantothenate biosynthesis
r1111	ATP[m] + 4PPNTE[m] -> PPI[m] + DPCOA[m]	Gap	Gap	Pantetheine-phosphate adenylyltransferase	2.7.7.3	Coenzyme A and pantothenate biosynthesis
r1112	ATP[c] + DPCOA[c] -> ADP[c] + COA[c]	evm.model.scaffold00293.13;evm.model.scaffold00398.4	evm.model.scaffold00293.13;evm.model.scaffold00398.4	Dephospho-CoA kinase	2.7.1.24	Coenzyme A and pantothenate biosynthesis
r1113	COA[c] + APOACP[c] -> PAP[c] + HOACP[c]	evm.model.scaffold00160.14	evm.model.scaffold00160.14	holo-[acyl-carrier-protein] synthase	2.7.8.7	Coenzyme A and pantothenate biosynthesis
r1114	COA[e] + + APOACP[e] -> PAP[e] + HOACP[e]	evm.model.scaffold00160.14	evm.model.scaffold00160.14	holo-[acyl-carrier-protein] synthase	2.7.8.7	Coenzyme A and pantothenate biosynthesis
r1115	AIR[c] -> AHM[c]	Gap	Gap	Thiamine biosynthesis protein (ThiC)		Thiamine Metabolism
r1116	ATP[c] + AHM[c] -> ADP[c] + AHMP[c]	evm.model.scaffold00177.8	evm.model.scaffold00177.8	Hydroxymethylpyrimidine kinase	2.7.1.49	Thiamine Metabolism
r1117	ATP[c] + AHMP[c] -> ADP[c] + AHMPP[c]	evm.model.scaffold00177.8	evm.model.scaffold00177.8	Phosphomethylpyrimidine kinase	2.7.4.7	Thiamine Metabolism
r1118	ATP[c] + THZ[c] -> ADP[c] + THZP[c]	evm.model.scaffold00046.12	evm.model.scaffold00046.12	Hydroxyethylthiazole kinase	2.7.1.50	Thiamine Metabolism
r1119	AHMPP[c] + THZP[c] -> PPI[c] + THMP[c]	evm.model.scaffold00046.12	evm.model.scaffold00046.12	Thiamine-phosphate diphosphorylase	2.5.1.3	Thiamine Metabolism
r1120	ATP[c] + THME[c] -> ADP[c] + THMP[c]	Gap	Gap	Thiamine kinase	2.7.1.89	Thiamine Metabolism
r1121	ATP[c] + THMP[c] <=> ADP[c] + THDP[c]	Gap	Gap	Thiamine-phosphate kinase	2.7.4.16	Thiamine Metabolism
r1122	ATP[c] + THME[c] -> AMP[c] + THDP[c]	evm.model.scaffold00105.18	evm.model.scaffold00105.18	Thiamine pyrophosphokinase	2.7.6.2	Thiamine Metabolism
r1123	ATP[c] + NIDRINE[c] <=> PPI[c] + NAD[c]	evm.model.scaffold00108.2;evm.model.scaffold00196.8; evm.model.scaffold00093.35	evm.model.scaffold00108.2;evm.model.scaffold00196.8; evm.model.scaffold00093.35	Nicotinamide-nucleotide adenylyltransferase	2.7.7.1	Nicotinate and nicotinamide metabolism
r1124	ATP[c] + NICNUCLE[c] <=> PPI[c] + DMNAD[c]	evm.model.scaffold00196.8;evm.model.scaffold00108.2	evm.model.scaffold00196.8;evm.model.scaffold00108.2	Nicotinate-nucleotide adenylyltransferase	2.7.7.18	Nicotinate and nicotinamide metabolism
r1125	ATP[c] + H2O[c] + GLN[c] + DMNAD[c] -> NAD[c] + AMP[c] + PPI[c] + GLU[c]	evm.model.scaffold00296.10	evm.model.scaffold00296.10	Glutamine dependent NAD synthetase	6.3.5.1	Nicotinate and nicotinamide metabolism
r1126	H2O[c] + NICD[c] -> NH3[c] + NICNATE[c]	evm.model.scaffold00289.11	evm.model.scaffold00289.11	Nicotinamidase	3.5.1.19	Nicotinate and nicotinamide metabolism
r1127	H2O[c] + PRPP[c] + NICNATE[c] -> PPI[c] + NICNUCLE[c]	evm.model.scaffold00016.46	evm.model.scaffold00016.46	Nicotinate phosphoribosyltransferase	2.4.2.11	Nicotinate and nicotinamide metabolism
r1128	NAD[c] + H2O[c] -> AMP[c] + NMN[c]	evm.model.scaffold00027.65	evm.model.scaffold00027.65	NAD diphosphatase	3.6.1.22	Nicotinate and nicotinamide metabolism
r1129	H2O[c] + NMN[c] -> R5P[c] + NICD[c]	Gap	Gap	Nicotinamide mononucleotide nucleosidase	3.2.2.14	Nicotinate and nicotinamide metabolism
r1130	CMUSA[c] -> H2O[c] + QA[c]	0	0	Spontaneous conversion	0	Nicotinate and nicotinamide metabolism
r1131	PRPP[c] + QA[c] -> CO2[c] + PPI[c] + NICNUCLE[c]	evm.model.scaffold00002.34	evm.model.scaffold00002.34	Nicotinate-nucleotide Pyriphosphorylase	2.4.2.19	Nicotinate and nicotinamide metabolism
r1132	ATP[c] + NAD[c] -> ADP[c] + NADP[c]	evm.model.scaffold00213.14; evm.model.scaffold00186.1;evm.model.scaffold00025.46	evm.model.scaffold00213.14; evm.model.scaffold00186.1;evm.model.scaffold00025.46	NAD kinase	2.7.1.23	Nicotinate and nicotinamide metabolism
r1133	NAD[m] + ATP[m] -> ADP[m] + NADP[m]	evm.model.scaffold00213.14	evm.model.scaffold00213.14	NAD kinase	2.7.1.23	Nicotinate and nicotinamide metabolism
r1134	ATP[e] + NAD[e] -> ADP[e] + NADP[e]	evm.model.scaffold00141.19	evm.model.scaffold00141.19	NAD kinase	2.7.1.23	Nicotinate and nicotinamide metabolism
r1135	SAM[c] + NICD[c] -> SAH[c] + METNIC[c]	evm.model.scaffold00155.12	evm.model.scaffold00155.12	Nicotinamide N-methyltransferase	2.1.1.1	Nicotinate and nicotinamide metabolism
r1136	ATP[c] + bDRIBN[c] -> ADP[c] + NICNUCLE[c]	evm.model.scaffold00316.5	evm.model.scaffold00316.5	Nicotinate riboside kinase	2.7.1.173	Nicotinate and nicotinamide metabolism
r1137	ATP[c] + PDXAM[c] -> ADP[c] + PDXAM5PI[c]	evm.model.scaffold00010.33	evm.model.scaffold00010.33	Pyridoxal kinase	2.7.1.35	Vitamin B6 Metabolism
r1138	ATP[c] + PDXAL[c] -> ADP[c] + PDXL5PI[c]	evm.model.scaffold00010.33	evm.model.scaffold00010.33	Pyridoxal kinase	2.7.1.35	Vitamin B6 Metabolism
r1139	ATP[c] + PDXI[c] -> ADP[c] + PDXIPI[c]	evm.model.scaffold00010.33	evm.model.scaffold00010.33	Pyridoxal kinase	2.7.1.35	Vitamin B6 Metabolism
r1140	H2O[c] + O2[c] + PDXIPI[c] -> H2O2[c] + NH3[c] + PDXL5PI[c]	evm.model.scaffold00031.24	evm.model.scaffold00031.24	Pyridoxamine phosphate oxidase	1.4.3.5	Vitamin B6 Metabolism
r1141	H2O[c] + O2[c] + PDXAM5PI[c] -> H2O2[c] + NH3[c] + PDXL5PI[c]	evm.model.scaffold00031.24	evm.model.scaffold00031.24	Pyridoxamine phosphate oxidase	1.4.3.5	Vitamin B6 Metabolism
r1142	H2O[c] + O2[c] + PDXAL[c] <=> H2O2[c] + NH3[c] + PDXI[c]	evm.model.scaffold00031.24	evm.model.scaffold00031.24	Pyridoxamine phosphate oxidase	1.4.3.5	Vitamin B6 Metabolism
r1143	H2O[c] + O2[c] + PDXAL[c] <=> H2O2[c] + NH3[c] + PDXAM[c]	evm.model.scaffold00031.24	evm.model.scaffold00031.24	Pyridoxamine phosphate oxidase	1.4.3.5	Vitamin B6 Metabolism
r1144	2 AMIEVUL[c] -> H2O[c] + PPBG[c]	evm.model.scaffold00073.38	evm.model.scaffold00073.38	Porphobilinogen synthase	4.2.1.24	Porphyrin and Chlorophyll metabolism
r1145	2 AMIEVUL[m] -> H2O[m] + PPBG[m]	evm.model.scaffold00073.38	evm.model.scaffold00073.38	Porphobilinogen synthase	4.2.1.24	Porphyrin and Chlorophyll metabolism
r1146	H2O[c] + 4 PPBG[c] -> 4 NH3[c] + HMTB[c]	evm.model.scaffold00170.3; evm.model.scaffold00363.3	evm.model.scaffold00170.3; evm.model.scaffold00363.3	Hydroxymethylbilane synthase	2.5.1.61	Porphyrin and Chlorophyll metabolism
r1147	H2O[m] + 4 PPBG[m] -> 4 NH3[m] + HMTB[m]	evm.model.scaffold00170.3; evm.model.scaffold00363.3	evm.model.scaffold00170.3; evm.model.scaffold00363.3	Hydroxymethylbilane synthase	2.5.1.61	Porphyrin and Chlorophyll metabolism
r1148	HMTB[c] -> H2O[c] + UPGIII[c]	evm.model.scaffold00024.17	evm.model.scaffold00024.17	Uroporphyrinogen-III synthase	4.2.1.75	Porphyrin and Chlorophyll metabolism
r1149	UPGIII[c] -> 4 CO2[c] + CPGIII[c]	evm.model.scaffold00059.37	evm.model.scaffold00059.37	Uroporphyrinogen decarboxylase	4.1.1.37	Porphyrin and Chlorophyll metabolism
r1150	UPGIII[m] -> 4 CO2[m] + CPGIII[m]	evm.model.scaffold00059.37	evm.model.scaffold00059.37	Uroporphyrinogen decarboxylase	4.1.1.37	Porphyrin and Chlorophyll metabolism
r1151	O2[c] + CPGIII[c] -> 2 H2O[c] + 2 CO2[c] + PPGIX[c]	evm.model.scaffold00030.4; evm.model.scaffold00348.4	evm.model.scaffold00030.4; evm.model.scaffold00348.4	Coproporphyrinogen III oxidase	1.3.3.3	Porphyrin and Chlorophyll metabolism
r1152	3 O2[m] + PPGIX[m] -> 3 H2O[m] + PPRIX[m]	evm.model.scaffold00005.40; evm.model.scaffold00055.26	evm.model.scaffold00005.40; evm.model.scaffold00055.26	Protoporphyrinogen oxidase	1.3.3.4	Porphyrin and Chlorophyll metabolism
r1153	PPRIX[m] + FE[m] -> PHEME[m]	evm.model.scaffold00030.13	evm.model.scaffold00030.13	Ferrochelatase	4.99.1.1	Porphyrin and Chlorophyll metabolism
r1154	PPRIX[c] + FE[c] -> PHEME[c]	evm.model.scaffold00030.13	evm.model.scaffold00030.13	Ferrochelatase	4.99.1.1	Porphyrin and Chlorophyll metabolism
r1155	PHEME[b] -> HEME_O[b]	evm.model.scaffold00301.8	evm.model.scaffold00301.8	Protohaem IX farnesyltransferase	2.5.1.-	Porphyrin and Chlorophyll metabolism
r1156	HEME_O[b] -> HEME_A[b]	evm.model.scaffold00068.9	evm.model.scaffold00068.9	Cytochrome oxidase assembly factor COX15		Porphyrin and Chlorophyll metabolism
r1157	PHEME[m] + APOCE[m] -> CYMEC[m]	evm.model.scaffold00033.30	evm.model.scaffold00033.30	Cytochrome c1 heme lyase	4.4.1.17	Porphyrin and Chlorophyll metabolism
r1158	PHEME[c] + APOCE[c] -> CYMEC[c]	evm.model.scaffold00263.13	evm.model.scaffold00263.13	Cytochrome c1 heme lyase	4.4.1.17	Porphyrin and Chlorophyll metabolism
r1159	SAM[c] + UPGIII[c] -> SAH[c] + PRECOR[c]	evm.model.scaffold00043.9	evm.model.scaffold00043.9	Uroporphyrin-III C-methyltransferase	2.1.1.107	Porphyrin and Chlorophyll metabolism
r1160	NAD[e] + PRECOR[e] -> NADH[e] + SHCR[e]	evm.model.scaffold00339.5	evm.model.scaffold00339.5	Precorrin-2 dehydrogenase	1.3.1.76	Porphyrin and Chlorophyll metabolism
r1161	SHCR[e] -> SIHM[e]	evm.model.scaffold00339.5	evm.model.scaffold00339.5	Sirohydrochlorin ferrochelatase	4.99.1.4	Porphyrin and Chlorophyll metabolism
r1162	CHOR[c] -> PYR[c] + 4HBZ[c]	Gap	Gap	Chorismate pyruvate lyase	4.1.3.-	Porphyrin and Chlorophyll metabolism
r1163	ATP[c] + COBNM[c] -> 3 PI[c] + ADCOBNM[c]	evm.model.scaffold00075.17	evm.model.scaffold00075.17	cob(I)yrinic acid a,c-diamide adenosyltransferase	2.5.1.17	Porphyrin and Chlorophyll metabolism
r1164	4HBZ[b] + NPP[b] -> PPI[b] + N4HBZ[b]	evm.model.scaffold00012.71	evm.model.scaffold00012.71	4-hydroxybenzoate octaprenyltransferase	2.5.1.-	Ubiquinone biosynthesis
r1165	N4HBZ[c] -> CO2[c] + 2NPPP[c]	Gap	Gap	3-octaprenyl-4-hydroxybenzoate carboxy-lyase	4.1.1.-	Ubiquinone biosynthesis
r1166	O2[c] + 2NPPP[c] -> 2N6H[c]	Gap	Gap	2-octaprenylphenol hydroxylase	1.13.14.-	Ubiquinone biosynthesis
r1167	SAM[m] + 2N6H[m] -> SAH[m] + 2NPMP[m]	evm.model.scaffold00073.4	evm.model.scaffold00073.4	3-demethylubiquinone-9 3-O-methyltransferase	2.1.1.64	Ubiquinone biosynthesis
r1168	O2[m] + 2NPMP[m] -> 2NPMB[m]	evm.model.scaffold00142.21	evm.model.scaffold00142.21	2-octaprenyl-6-methoxyphenol hydroxylase	1.14.13.-	Ubiquinone biosynthesis
r1169	SAM[c] + 2NPMB[c] -> SAH[c] + 2NPMMB[c]	evm.model.scaffold00221.18	evm.model.scaffold00221.18	Ubiquinone biosynthesis methlytransferase	2.1.1.-	Ubiquinone biosynthesis
r1170	O2[m] + 2NPMMB[m] -> 2NMHMB[m]	evm.model.scaffold00102.27	evm.model.scaffold00102.27	2-octaprenyl-3-methyl-6-methoxy-1,4-benzoquinone hydroxylase	1.14.13.-	Ubiquinone biosynthesis
r1171	O2[c] + 2NPMMB[c] -> 2NMHMB[c]	evm.model.scaffold00215.21	evm.model.scaffold00215.21	2-octaprenyl-3-methyl-6-methoxy-1,4-benzoquinone hydroxylase	1.14.13.-	Ubiquinone biosynthesis
r1172	SAM[m] + 2NMHMB[m] -> Q[m] + SAH[m]	evm.model.scaffold00073.4	evm.model.scaffold00073.4	3-demethylubiquinone-9 3-O-methyltransferase	2.1.1.64	Ubiquinone biosynthesis
r1173	NADPH[c] + O2[c] + 4HBZ[c] -> H2O[c] + NADP[c] + PCACE[c]	Gap	Gap	P-hydroxybenzoate hydroxylase	1.14.13.2	Ubiquinone biosynthesis
r1174	SAM[c] + 2N6H[c] -> SAH[c] + 2NPMP[c]	evm.model.scaffold00073.4	evm.model.scaffold00073.4	2-polyprenyl-6-hydroxyphel methylase	2.1.1.222	Ubiquinone biosynthesis
r1175	PLPNDPI[b] + HBZA[b] -> PPI[b] + HPLPNBZA[b]	evm.model.scaffold00012.69	evm.model.scaffold00012.69	4-hydroxybenzoate polyprenyltransferase	2.5.1.39	Ubiquinone and other terpenoid-quinone biosynthesis
r1176	4CMRE[c] + ATP[c] + COA[c] -> 4CMCOA[c] + AMP[c] + PPI[c]	evm.model.scaffold00286.13;evm.model.scaffold00017.16;evm.model.scaffold00003.38;evm.model.scaffold00017.17;evm.model.scaffold00022.33;evm.model.scaffold00126.5	evm.model.scaffold00286.13;evm.model.scaffold00017.16;evm.model.scaffold00003.38;evm.model.scaffold00017.17;evm.model.scaffold00022.33;evm.model.scaffold00126.5	4-coumarate-CoA ligase	6.2.1.12	Ubiquinone and other terpenoid-quinone biosynthesis
r1177	GTP[c] -> PPI[c] + FOR[c] + D6RP5P[c]	evm.model.scaffold00067.35	evm.model.scaffold00067.35	GTP cyclohydrolase II	3.5.4.25	Riboflavin, FMN and FAD metabolism
r1178	D6RP5P[c] -> NH3[c] + A6RP5P[c]	Gap	Gap	Diaminohydroxyphosphoribosylaminopyrimidine deaminase	3.5.4.26	Riboflavin, FMN and FAD metabolism
r1179	NADPH[c] + A6RP5P[c] -> NADP[c] + A6RP5P2[c]	evm.model.scaffold00076.5	evm.model.scaffold00076.5	5-amino-6-(5-phosphoribosylamino)uracil reductase	1.1.1.193	Riboflavin, FMN and FAD metabolism
r1180	H2O[c] + A6RP5P2[c] -> PI[c] + A6RP[c]	Gap	Gap	Phosphoric monoester hydrolases	3.1.3.-	Riboflavin, FMN and FAD metabolism
r1181	RL5P[c] -> FOR[c] + DB4P[c]	evm.model.scaffold00253.19	evm.model.scaffold00253.19	3,4-dihydroxy-2-butanone 4-phosphate synthase	4.1.99.12	Riboflavin, FMN and FAD metabolism
r1182	A6RP[c] + DB4P[c] -> PI[c] + 2 H2O[c] + D8RL[c]	evm.model.scaffold00043.18	evm.model.scaffold00043.18	6,7-dimethyl-8-ribityllumazine synthase	2.5.1.78	Riboflavin, FMN and FAD metabolism
r1183	D8RL[c] -> A6RP[c] + RIBFLAV[c]	evm.model.scaffold00141.30	evm.model.scaffold00141.30	Riboflavin synthase	2.5.1.9	Riboflavin, FMN and FAD metabolism
r1184	ATP[c] + RIBFLAV[c] -> ADP[c] + FMN[c]	evm.model.scaffold00192.27;evm.model.scaffold00317.9;evm.model.scaffold00253.18	evm.model.scaffold00192.27;evm.model.scaffold00317.9;evm.model.scaffold00253.18	Riboflavin kinase	2.7.1.26	Riboflavin, FMN and FAD metabolism
r1185	ATP[c] + FMN[c] -> PPI[c] + FAD[c]	evm.model.scaffold00050.39	evm.model.scaffold00050.39	FMN adenylyltransferase	2.7.7.2	Riboflavin, FMN and FAD metabolism
r1186	FMN[c] -> PI[c] + RIBFLAV[c]	evm.model.scaffold00147.16;evm.model.scaffold00225.18;evm.model.scaffold00035.34;evm.model.scaffold00127.1	evm.model.scaffold00147.16;evm.model.scaffold00225.18;evm.model.scaffold00035.34;evm.model.scaffold00127.1	Acid phosphatase	3.1.3.2	Riboflavin, FMN and FAD metabolism
r1187	FMNH2[c] + NADP[c] -> FMN[c] + NADPH[c]	evm.model.scaffold00153.15	evm.model.scaffold00153.15	FMN reductase	1.5.1.39	Riboflavin metabolism
r1188	ATP[c] + COA[c] + 6CARHEX[c] -> AMP[c] + PPI[c] + CHCOA[c]	Gap	Gap	6-carboxyhexanoate-CoA ligase	6.2.1.14	Biotin Metabolism
r1189	ALA[c] + CHCOA[c] -> CO2[c] + COA[c] + AONA[c]	evm.model.scaffold00163.18	evm.model.scaffold00163.18	8-amino-7-oxononanoate synthase	2.3.1.47	Biotin Metabolism
r1190	ALA[m] + CHCOA[m] -> COA[m] + CO2[m] + AONA[m]	evm.model.scaffold00163.18	evm.model.scaffold00163.18	8-amino-7-oxononanoate synthase	2.3.1.47	Biotin Metabolism
r1191	SAM[c] + AONA[c] -> SAMOB[c] + DANNA[c]	evm.model.scaffold00082.29	evm.model.scaffold00082.29	Adenosylmethionine-8-amino-7-oxononanoate transaminase	2.6.1.62	Biotin Metabolism
r1192	ATP[c] + CO2[c] + DANNA[c] -> ADP[c] + PI[c] + DTB[c]	Gap	Gap	Dethiobiotin synthase	6.3.3.3	Biotin Metabolism
r1193	2 SAM[c] + DTB[c] + S[c] -> 2 MET[c] + 2 DA[c] + BT[c]	evm.model.scaffold00082.28	evm.model.scaffold00082.28	Biotin synthase	2.8.1.6	Biotin Metabolism
r1194	2 SAM[m] + DTB[m] + S[m] -> 2 MET[m] + BT[m] + 2 DA[m]	evm.model.scaffold00082.28	evm.model.scaffold00082.28	Biotin synthase	2.8.1.6	Biotin Metabolism
r1195	ATP[c] + BT[c] -> PPI[c] + BTAMP[c]	evm.model.scaffold00307.11	evm.model.scaffold00307.11	Biotin acetyl-CoA carboxylase ligase	6.3.4.15	Biotin Metabolism
r1196	BTAMP[c] + APOCARB[c] -> AMP[c] + BCCP[c]	evm.model.scaffold00307.11;evm.model.scaffold00189.1	evm.model.scaffold00307.11;evm.model.scaffold00189.1	Biotin acetyl-CoA carboxylase ligase	6.3.4.15	Biotin Metabolism
r1197	SAM[c] + MALACP[c] -> SAH[c] + MALACP_MES[c]	evm.model.scaffold00180.6	evm.model.scaffold00180.6	Malonyl-[acyl-carrier protein] O-methyltransferase	2.1.1.197	Biotin Metabolism
r1198	CYSTE[c] -> CO2[c] + TAUR[c]	evm.model.scaffold00155.22;evm.model.scaffold00014.77	evm.model.scaffold00155.22;evm.model.scaffold00014.77	Glutamate decarboxylase	4.1.1.15	Taurine and hypotaurine metabolism
r1199	CYSTE[m] -> CO2[m] + TAUR[m]	evm.model.scaffold00026.43	evm.model.scaffold00026.43	Glutamate decarboxylase	4.1.1.15	Taurine and hypotaurine metabolism
r1200	AKG[c] + O2[c] + TAUR[c] -> CO2[c] + SUCC[c] + H2S[c] + AMIACE[c]	evm.model.scaffold00399.2	evm.model.scaffold00399.2	Alpha-ketoglutarate-dependent taurine dioxygenase	1.14.11.17	Taurine and hypotaurine metabolism
r1201	ATP[c] + GLU[c] + CYS[c] -> ADP[c] + PI[c] + GC[c]	evm.model.scaffold00170.21	evm.model.scaffold00170.21	Gamma-Glutamylcysteine synthetase	6.3.2.2	Glutathione biosynthesis
r1202	ATP[c] + GLY[c] + GC[c] -> ADP[c] + PI[c] + RGT[c]	evm.model.scaffold00112.1	evm.model.scaffold00112.1	Glutathione synthetase	6.3.2.3	Glutathione biosynthesis
r1203	RGT[c] + RX[c] -> RSGT[c] + HX[c]	evm.model.scaffold00012.47; evm.model.scaffold00212.16; evm.model.scaffold00043.44; evm.model.scaffold00103.7; evm.model.scaffold00615.1; evm.model.scaffold00155.17; evm.model.scaffold00034.8; evm.model.scaffold00106.13; evm.model.scaffold00106.13; evm.model.scaffold00080.13; evm.model.scaffold00019.57	evm.model.scaffold00012.47; evm.model.scaffold00212.16; evm.model.scaffold00043.44; evm.model.scaffold00103.7; evm.model.scaffold00615.1; evm.model.scaffold00155.17; evm.model.scaffold00034.8; evm.model.scaffold00106.13; evm.model.scaffold00106.13; evm.model.scaffold00080.13; evm.model.scaffold00019.57	Glutathione S-transferase	2.5.1.18	Glutathione biosynthesis
r1204	RGT[b] + RX[b] -> RSGT[b] + HX[b]	evm.model.scaffold00012.47; evm.model.scaffold00212.16	evm.model.scaffold00012.47; evm.model.scaffold00212.16	Glutathione S-transferase	2.5.1.18	Glutathione biosynthesis
r1205	RSGT[b] + ALA[b] -> CGLY[b] + ALAGLY[b]	evm.model.scaffold00183.12; evm.model.scaffold00317.4	evm.model.scaffold00183.12; evm.model.scaffold00317.4	Gamma-glutamyltranspeptidase	2.3.2.2	Glutathione biosynthesis
r1206	RSGT[c] + ALA[c] -> CGLY[c] + ALAGLY[c]	evm.model.scaffold00001.151; evm.model.scaffold00041.14	evm.model.scaffold00001.151; evm.model.scaffold00041.14	Gamma-glutamyltranspeptidase	2.3.2.2	Glutathione biosynthesis
r1207	RSGT[p] + ALA[p] -> CGLY[p] + ALAGLY[p]	evm.model.scaffold00041.14	evm.model.scaffold00041.14	Gamma-glutamyltranspeptidase	2.3.2.2	Glutathione biosynthesis
r1208	H2O[c] + CGLY[c] -> GLY[c] + CYS[c]	evm.model.scaffold00276.2	evm.model.scaffold00276.2	Leucyl aminopeptidase	3.4.11.1	Glutathione biosynthesis
r1209	ATP[c] + 2 H2O[c] + 5OXOPRO[c] -> ADP[c] + PI[c] + GLU[c]	evm.model.scaffold00348.3	evm.model.scaffold00348.3	5-oxoprolinase (ATP-hydrolysing)	3.5.2.9	Glutathione biosynthesis
r1210	2 RGT[c] + H2O2[c] -> 2 H2O[c] + RSGT[c]	evm.model.scaffold00031.19; evm.model.scaffold00007.30	evm.model.scaffold00031.19; evm.model.scaffold00007.30	Glutathione peroxidase	1.11.1.9	Glutathione biosynthesis
r1211	2 RGT[m] + H2O2[m] -> 2 H2O[m] + RSGT[m]	evm.model.scaffold00007.30	evm.model.scaffold00007.30	Glutathione peroxidase	1.11.1.9	Glutathione biosynthesis
r1212	NADPH[c] + RSGT[c] -> NADP[c] + 2 RGT[c]	evm.model.scaffold00326.1	evm.model.scaffold00326.1	Glutathione reductase (NADPH)	1.8.1.7	Glutathione biosynthesis
r1213	H2O[c] + CGLY[c] -> GLY[c] + CYS[c]	evm.model.scaffold00276.2; evm.model.scaffold00198.15	evm.model.scaffold00276.2; evm.model.scaffold00198.15	Cysteinylglycine dipeptidase	3.4.11.2	Glutathione biosynthesis
r1214	2 RTHIO[c] + ROOH[c] -> OTHIO[c] + H2O[c] + ROH[c]	evm.model.scaffold00038.23; evm.model.scaffold00068.32; evm.model.scaffold00035.9	evm.model.scaffold00038.23; evm.model.scaffold00068.32; evm.model.scaffold00035.9	peroxiredoxin	1.11.1.15	Glutathione metabolism
r1215	2 RGT[c] + ROOH[c] -> RGTDS[c] + H2O[c] + ROH[c]	evm.model.scaffold00038.23; evm.model.scaffold00068.32; evm.model.scaffold00035.9	evm.model.scaffold00038.23; evm.model.scaffold00068.32; evm.model.scaffold00035.9	peroxiredoxin	1.11.1.15	Glutathione metabolism
r1216	C80ACP[c] + 2 SSC[c] + 2 SAM[c] + 2 RFERN[c] -> LIPACP[c] + 2 SCARR[c] + 2 MET[c] + 2 5DA[c] + 2 OFERN[c]	evm.model.scaffold00098.6	evm.model.scaffold00098.6	Lipoyl synthase	2.8.1.8	Lipoic acid metabolism
r1217	LIPACP[c] + PROTEIN [c] -> PROTEIN_LIPL[c] + ACP[c]	evm.model.scaffold00263.14	evm.model.scaffold00263.14	Lipoyl(octayl) transferase	2.3.1.181	Lipoic acid metabolism	Updated reaction
r1218	C80ACP[c] + PROTEIN [c] -> PROTEIN_C80L[c] + ACP[c]	evm.model.scaffold00263.14	evm.model.scaffold00263.14	Lipoyl(octayl) transferase	2.3.1.181	Lipoic acid metabolism	Updated reaction
r1219	PROTEIN_C80L[c] + 2 SSC[c] + 2 SAM[c] + 2 RFERN[c] -> PROTEIN_LIPL[c] + 2 SCARR[c] + 2 MET[c] + 2 5DA[c] + 2 OFERN[c]	evm.model.scaffold00098.6	evm.model.scaffold00098.6	Lipoyl synthase	2.8.1.8	Lipoic acid metabolism
r1220	ATP[c] + LIPIC[c] -> PPI[c] + LIPAMP[c]	evm.model.scaffold00113.29	evm.model.scaffold00113.29	Lipoate-protein ligase	2.7.7.63	Lipoic acid metabolism
r1221	LIPAMP[c] + APOPROT[c] -> PROTEIN_LIPL[c] + AMP[c]	evm.model.scaffold00113.29	evm.model.scaffold00113.29	Lipoate-protein ligase	2.7.7.63	Lipoic acid metabolism
r1222	2 GGPP[b] -> PTEPPI[b] + PPI[b]	evm.model.scaffold00422.3; evm.model.scaffold00226.19; evm.model.scaffold00020.17	evm.model.scaffold00422.3; evm.model.scaffold00226.19; evm.model.scaffold00020.17	phytoene synthase	2.5.1.32	Carotenoid biosynthesis
r1223	PTEPPI[b] -> PTE[b] + PPI[b]	evm.model.scaffold00422.3; evm.model.scaffold00226.19; evm.model.scaffold00020.17	evm.model.scaffold00422.3; evm.model.scaffold00226.19; evm.model.scaffold00020.17	phytoene synthase	2.5.1.32	Carotenoid biosynthesis
r1224	PTE[b] + 4 FAD[b] -> LCP[b] + 4 FADH2[b]	evm.model.scaffold00422.2; evm.model.scaffold00226.18	evm.model.scaffold00422.2; evm.model.scaffold00226.18	Phytoene desaturase	1.3.99.31	Carotenoid biosynthesis
r1225	LCP[b] -> GCATE[b]	evm.model.scaffold00422.3; evm.model.scaffold00226.19	evm.model.scaffold00422.3; evm.model.scaffold00226.19	lycopene cyclase	5.5.1.19	Carotenoid biosynthesis
r1226	GCATE[b] -> BCATE[b]	evm.model.scaffold00422.3; evm.model.scaffold00226.19	evm.model.scaffold00422.3; evm.model.scaffold00226.19	lycopene cyclase	5.5.1.19	Carotenoid biosynthesis
r1227	BCATE[b] + O2[b] -> 2 RTN[b]	evm.model.scaffold00038.67	evm.model.scaffold00038.67	beta, beta-carotene 15,15'-dioxygenase	1.13.11.63	Retinol metabolism
r1228	5.168 ATP[c] + 0.0626 GLU[c] + 0.0591 ASP[c] + 0.0719 ALA[c] + 0.0509 GLY[c] + 0.0493 GLN[c] + 0.0494 ASN[c] + 0.0476 ARG[c] + 0.0493 PRO[c] + 0.0128 CYS[c] + 0.0834 SER[c] + 0.0623 THR[c] + 0.0255 HIS[c] + 0.0579 ILE[c] + 0.033 VAL[c] + 0.0881 LEU[c] + 0.033 TYR[c] + 0.0624 LYS[c] + 0.0249 MET[c] + 0.0111 TRP[c] + 0.0389 PHE[c] -> 5.168 ADP[c] + 5.168 PI[c] + Protein[c]					Protein formation
r1229	2.544 ATP[c] + 0.241 GTP[c] + 0.225 UTP[c] + 0.253 CTP[c] -> 2.544 ADP[c] + 2.544 PI[c] + RNA[c]					RNA formation
r1230	0.11785 ERGOSE[c] + 0.725 TAGLY[c] + 0.01955 DAGLY[c] + 0.03188 PC[c] + 0.00684 PA[c] + 0.04264 PE[c] + 0.00302 PS[c] + 0.05227 FFA[c] + 0.00093 PINS[c] -> Lipid[c]					Lipid formation
r1231	3.739 ATP[c] + 0.2989 DATP[c] + 0.2136 DGTP[c] + 0.220 DCTP[c] + 0.2654 DTTP[c] -> 3.739 ADP[c] + 3.739 PI[c] + DNA[c]					DNA formation	Updated reaction
r1232	153 ATP[c] + 0.44 UDPGE[c] + 0.1676 GDPFUC[c] + 0.0643 MAN[c] + 0.0018 GLYNIN[c] + 0.0026 CHIT[c] + 0.0001 CHITO[c] + 2.7618 Protein[c] + 0.1564 RNA[c] + 0.0891 DNA[c] + 0.3317 Lipid[c] -> 153 ADP[c] + 153 PI[c] + BIOMASS[c]					Biomass formation	Updated reaction
r1233	ATP[c] + H2O[c] -> ADP[c] + PI[c]					Maintenance requirements (n-growth associated)
r1234	GLC[e] <=> GLC[c]					Transport reaction	Added reaction
r1235	NH3[e] <=> NH3[c]					Transport reaction	Added reaction
r1236	O2[e] <=> O2[c]					Transport reaction	Added reaction
r1237	H2O[e] <=> H2O[c]					Transport reaction	Added reaction
r1238	H_PO[e] <=> H_PO[c]					Transport reaction	Added reaction
r1239	SLF[e] <=> SLF[c]					Transport reaction	Added reaction
r1240	PI[e] <=> PI[c]					Transport reaction	Added reaction
r1241	CO2[e] <=> CO2[c]					Transport reaction	Added reaction
r1242	HNO3[e] <=> HNO3[c]					Transport reaction	Added reaction
r1243	H2SO3[e] <=> H2SO3[c]					Transport reaction	Added reaction
r1244	TAGLY[c] <=> TAGLY[e]					Transport reaction	Added reaction
r1245	LPC[e] <=> LPC[c]					Transport reaction	Added reaction
r1246	ACGLPE[e] <=> ACGLPE[c]					Transport reaction	Added reaction
r1247	BIOMASS[c] <=> BIOMASS[e]					Transport reaction	Added reaction
r1248	CO2[c] <=> CO2[m]					Transport reaction	Added reaction
r1249	H2O[c] <=> H2O[m]					Transport reaction	Added reaction
r1250	O2[c] <=> O2[m]					Transport reaction	Added reaction
r1251	NH3[c] <=> NH3[m]					Transport reaction	Added reaction
r1252	ETH[c] <=> ETH[m]					Transport reaction	Added reaction
r1253	NADH[c] <=> NADH[m]					Transport reaction	Added reaction
r1254	O2[c] <=> O2[m]					Transport reaction	Added reaction
r1255	HNO3[c] <=> HNO3[m]					Transport reaction	Added reaction
r1256	ACAL[c] <=> ACAL[m]					Transport reaction	Added reaction
r1257	PI[c] <=> PI[m]					Transport reaction	Added reaction
r1258	OIVAL[c] <=> OIVAL[m]					Transport reaction	Added reaction
r1259	OMVAL[c] <=> OMVAL[m]					Transport reaction	Added reaction
r1260	GL3P[c] -> GL3P[m]					Transport reaction	Added reaction
r1261	THR[m] <=> THR[c]					Transport reaction	Added reaction
r1262	PYR[c] <=> PYR[m]					Transport reaction	Added reaction
r1263	AKG[m] <=> AKG[c]					Transport reaction	Added reaction
r1264	MYOI[p] <=> MYOI[c]					Transport reaction	Added reaction
r1265	PS[p] <=> PS[c]					Transport reaction	Added reaction
r1266	PINS[p] <=> PINS[c]					Transport reaction	Added reaction
r1267	P5C[m] <=> P5C[c]					Transport reaction	Added reaction
r1268	GLUGSAL[m] <=> GLUGSAL[c]					Transport reaction	Added reaction
r1269	GLUP[m] <=> GLUP[c]					Transport reaction	Added reaction
r1270	SME[m] <=> SME[c]					Transport reaction	Added reaction
r1271	DHSK[m] <=> DHSK[c]					Transport reaction	Added reaction
r1272	GLN[c] <=> GLN[m]					Transport reaction	Added reaction
r1273	ACCOA[c] <=> ACCOA[m]					Transport reaction	Added reaction
r1274	ASP[c] <=> ASP[m]					Transport reaction	Added reaction
r1275	AC[c] <=> AC[m]					Transport reaction	Added reaction
r1276	FOR[c] <=> FOR[m]					Transport reaction	Added reaction
r1277	CO2[x] <=> CO2[c]					Transport reaction	Added reaction
r1278	H2O[x] <=> H2O[c]					Transport reaction	Added reaction
r1279	O2[x] <=> O2[c]					Transport reaction	Added reaction
r1280	ORN[c] <=> ORN[m]					Transport reaction	Added reaction
r1281	OIVAL[c] <=> OIVAL[m]					Transport reaction	Added reaction
r1282	IPPMAL[c] <=> IPPMAL[m]					Transport reaction	Added reaction
r1283	OMVAL[c] <=> OMVAL[m]					Transport reaction	Added reaction
r1284	THR[m] <=> THR[c]					Transport reaction	Added reaction
r1285	OICAP[m] <=> OICAP[c]					Transport reaction	Added reaction
r1286	CAP[m] <=> CAP[c]					Transport reaction	Added reaction
r1287	KYN[m] <=> KYN[c]					Transport reaction	Added reaction
r1288	HKYN[m] <=> HKYN[c]					Transport reaction	Added reaction
r1289	DOROA[m] <=> DOROA[c]					Transport reaction	Added reaction
r1290	OROA[m] <=> OROA[c]					Transport reaction	Added reaction
r1291	THF[c] <=> THF[m]					Transport reaction	Added reaction
r1292	FTHF[c] <=> FTHF[m]					Transport reaction	Added reaction
r1293	METTHF[c] <=> METTHF[m]					Transport reaction	Added reaction
r1294	METHF[m] <=> METHF[c]					Transport reaction	Added reaction
r1295	GLY[m] <=> GLY[c]					Transport reaction	Added reaction
r1296	SER[m] <=> SER[c]					Transport reaction	Added reaction
r1297	CITR[m] <=> CITR[c]					Transport reaction	Added reaction
r1298	GLU[c] <=> GLU[m]					Transport reaction	Added reaction
r1299	SAM[c] <=> SAM[m]					Transport reaction	Added reaction
r1300	SAH[c] <=> SAH[m]					Transport reaction	Added reaction
r1301	PA[c] <=> PA[m]					Transport reaction	Added reaction
r1302	H3MCOA[c] <=> H3MCOA[m]					Transport reaction	Added reaction
r1303	DHF[c] <=> DHF[m]					Transport reaction	Added reaction
r1304	PROP[c] <=> PROP[m]					Transport reaction	Added reaction
r1305	PYR[c] -> PYR[m]					Transport reaction	Added reaction
r1306	SUCC[m] <=> SUCC[c]					Transport reaction	Added reaction
r1307	FUM[m] <=> FUM[c]					Transport reaction	Added reaction
r1308	MAL[m] <=> MAL[c]					Transport reaction	Added reaction
r1309	CIT[m] <=> CIT[c]					Transport reaction	Added reaction
r1310	ICIT[m] <=> ICIT[c]					Transport reaction	Added reaction
r1311	AKG[m] <=> AKG[c]					Transport reaction	Added reaction
r1312	OA[c] <=> OA[m]					Transport reaction	Added reaction
r1313	SUCC[x] -> SUCC[c]					Transport reaction	Added reaction
r1314	MAL[x] -> MAL[c]					Transport reaction	Added reaction
r1315	HIURTE[x] <=> HIURTE[c]					Transport reaction	Added reaction
r1316	AKG[x] <=> AKG[c]					Transport reaction	Added reaction
r1317	ATT[x] <=> ATT[c]					Transport reaction	Added reaction
r1318	UREA[x] <=> UREA[c]					Transport reaction	Added reaction
r1319	PYR[x] <=> PYR[c]					Transport reaction	Added reaction
r1320	PROPCOA[x] <=> PROPCOA[c]					Transport reaction	Added reaction
r1321	GLAL[x] <=> GLAL[c]					Transport reaction	Added reaction
r1322	OA[x] <=> OA[c]					Transport reaction	Added reaction
r1323	XAN[x] <=> XAN[c]					Transport reaction	Added reaction
r1324	UGC[c] <=> UGC[x]					Transport reaction	Added reaction
r1325	H2O2[x] <=> H2O2[c]					Transport reaction	Added reaction
r1326	ADP[c] + PI[c] + ATP[m] -> ATP[c] + PI[m] + ADP[m] + H[m]					Transport reaction	Added reaction
r1327	CIT[c] + MAL[m] <=> CIT[m] + MAL[c]					Transport reaction	Added reaction
r1328	CIT[c] + ICIT[m] <=> CIT[m] + ICIT[c]					Transport reaction	Added reaction
r1329	CIT[c] + PEP[m] <=> PEP[c] + CIT[m]					Transport reaction	Added reaction
r1330	ICIT[m] + MAL[c] -> ICIT[c] + MAL[m]					Transport reaction	Added reaction
r1331	CIT[m] + MAL[c] -> CIT[c] + MAL[m]					Transport reaction	Added reaction
r1332	PI[m] + SUCC[c] -> PI[c] + SUCC[m]					Transport reaction	Added reaction
r1333	SUCC[m] + MAL[c] <=> SUCC[c] + MAL[m]					Transport reaction	Added reaction
r1334	PI[m] + MAL[c] <=> PI[c] + MAL[m]					Transport reaction	Added reaction
r1335	SUCC[c] + FUM[m] -> SUCC[m] + FUM[c]					Transport reaction	Added reaction
r1336	ICIT[c] + MAL[x] -> MAL[c] + ICIT[x]					Transport reaction	Added reaction
r1337	ASP[m] + GLU[c] <=> GLU[m] + ASP[c]					Transport reaction	Added reaction
r1338	AKG[m] + MAL[c] <=> AKG[c] + MAL[m]					Transport reaction	Added reaction
r1339	GLC[e] <=>					Exchange reaction	Added reaction
r1340	NH3[e] <=>					Exchange reaction	Added reaction
r1341	O2[e] <=>					Exchange reaction	Added reaction
r1342	H2O[e] <=>					Exchange reaction	Added reaction
r1343	H_PO[e] <=>					Exchange reaction	Added reaction
r1344	NADPH[e] <=>					Exchange reaction	Added reaction
r1345	NADH[e] <=>					Exchange reaction	Added reaction
r1346	SLF[e] <=>					Exchange reaction	Added reaction
r1347	PI[e] <=>					Exchange reaction	Added reaction
r1348	CO2[e] <=>					Exchange reaction	Added reaction
r1349	NH4[e] <=> NH3[e]					Exchange reaction	Added reaction
r1350	NH4[e] <=>					Exchange reaction	Added reaction
r1351	H2SO3[e] <=>					Exchange reaction	Added reaction
r1352	TAGLY[e] <=>					Exchange reaction	Added reaction
r1353	LPC[e] <=>					Exchange reaction	Added reaction
r1354	ACGLPE[e] <=>					Exchange reaction	Added reaction
r1355	BIOMASS[e] <=>					Exchange reaction	Added reaction

## Sheet: Metabolites
Supplementary File 1: Detailed GPR information of model iNI1159
Table S1.2: List of metabolite name, description and compartment of the iNI1159 model
Metabolite name	Metabolite description	Metabolite compartment
13GLUCAN[b]	1,3-beta-D-glucan	plasma membrane
13GLUCAN[c]	1,3-beta-D-glucan	cytoplasm
13GLUCAN[e]	1,3-beta-D-glucan	extracellular
13PDG[c]	3-phospho-D-glyceroyl phosphate	cytoplasm
14GLUCAN[b]	3-phospho-D-glyceroyl phosphate	cytoplasm
14GLUCAN[c]	1,4-beta-D-glucan	cytoplasm
14GLUCAN[e]	1,4-beta-D-glucan	extracellular
14MLNST[c]	14-demethyl-lanosterol	cytoplasm
14MNAN[c]	14-demethyl-lanosterol	cytoplasm
2N6H[c]	6-hydroxy-2-octaprenylphenol	cytoplasm
2N6H[m]	6-hydroxy-2-octaprenylphenol	mitochondria
2NMHMB[c]	3-demethylubiquinone-8	cytoplasm
2NMHMB[m]	3-demethylubiquinone-8	mitochondria
2NPMB[c]	6-methoxy-2-octaprenyl-1,4-benzoquinone	cytoplasm
2NPMB[m]	6-methoxy-2-octaprenyl-1,4-benzoquinone	mitochondria
2NPMMB[c]	3-methyl-6-methoxy-2-octaprenyl-1,4-benzoquinone	cytoplasm
2NPMMB[m]	3-methyl-6-methoxy-2-octaprenyl-1,4-benzoquinone	mitochondria
2NPMP[c]	6-methoxy-2-octaprenylphenol	cytoplasm
2NPMP[m]	6-methoxy-2-octaprenylphenol	mitochondria
2NPPP[c]	2-octaprenylphenol	cytoplasm
2PG[c]	2-phospho-D-glycerate	cytoplasm
3DDAH7P[b]	2-phospho-D-glycerate	cytoplasm
3DDAH7P[c]	2-dehydro-3-deoxy-D-arabino-heptonate 7-phosphate	cytoplasm
3PG[c]	3-phospho-D-glycerate	cytoplasm
3PG[m]	3-phospho-D-glycerate	mitochondria
3PSER[c]	O-phospho-L-serine	cytoplasm
3PSME[b]	O-phospho-L-serine	cytoplasm
3PSME[c]	5-O-(1-carboxyvinyl)-3-phosphoshikimate	cytoplasm
3PSME[m]	5-O-(1-carboxyvinyl)-3-phosphoshikimate	mitochondria
3SULALA[c]	3-sulfino-L-alanine	cytoplasm
44MACHL[c]	4,4-dimethyl-cholesta-8,14,24-trienol	cytoplasm
45ERSOL[b]	4alpha-methyl-5alpha-ergosta-8,14,24(28)-trien-3beta-ol	plasma membrane
45ERSOL[c]	4alpha-methyl-5alpha-ergosta-8,14,24(28)-trien-3beta-ol	cytoplasm
4CMCOA[c]	4-coumaroyl-CoA	cytoplasm
4CMRE[c]	4-coumaroyl-CoA	cytoplasm
4HBZ[b]	4-hydroxybenzoate	plasma membrane
4HBZ[c]	4-hydroxybenzoate	cytoplasm
4HPP[c]	3-(4-hydroxyphenyl)pyruvate	cytoplasm
4HPP[m]	3-(4-hydroxyphenyl)pyruvate	mitochondria
4PPNCYS[c]	N-((R)-4'-phosphopantothenoyl)-L-cysteine	cytoplasm
4PPNTE[c]	pantetheine 4'-phosphate	cytoplasm
4PPNTE[m]	pantetheine 4'-phosphate	mitochondria
4PPNTO[c]	(R)-4'-phosphopantothenate	cytoplasm
5DA[c]	5'-deoxyadenosine	cytoplasm
5MTA[b]	5'-S-methyl-5'-thioadenosine	plasma membrane
5MTA[c]	5'-S-methyl-5'-thioadenosine	cytoplasm
5OXOPRO[c]	5-oxo-L-proline	cytoplasm
5THR1P[c]	S-methyl-5-thio-D-ribose 1-phosphate	cytoplasm
6CARHEX[c]	pimelate	cytoplasm
A6OXO[b]	pimelate	cytoplasm
A6OXO[c]	pimelate	cytoplasm
A6RP[c]	5-amino-6-ribityluracil	cytoplasm
A6RP5P[c]	5-amino-6-(5-phosphoribosylamino)uracil	cytoplasm
A6RP5P2[c]	5-amino-6-(5'-phosphoribitylamino)uracil	cytoplasm
AABUTNOL[c]	Acetyl amino butanol	cytoplasm
AACACP[c]	3-oxoacyl-[acp]	cytoplasm
AACACP[m]	3-oxoacyl-[acp]	mitochondria
AACCOA[c]	acetoacetyl-CoA	cytoplasm
AACCOA[m]	acetoacetyl-CoA	mitochondria
AACCOA[p]	acetoacetyl-CoA	mitochondria
ABUT[c]	acetohydroxybutyrate	cytoplasm
ABUT[m]	acetohydroxybutyrate	mitochondria
AC[b]	acetate	plasma membrane
AC[c]	acetate	cytoplasm
AC[e]	acetate	extracellular
AC[m]	acetate	mitochondria
AC[p]	acetate	mitochondria
ACACP[c]	acetyl-[acp]	cytoplasm
ACAL[b]	acetaldehyde	plasma membrane
ACAL[c]	acetaldehyde	cytoplasm
ACAL[e]	acetaldehyde	extracellular
ACAL[m]	acetaldehyde	mitochondria
ACCOA[b]	acetyl-CoA	plasma membrane
ACCOA[c]	acetyl-CoA	cytoplasm
ACCOA[m]	acetyl-CoA	mitochondria
ACCOA[p]	acetyl-CoA	mitochondria
ACET[m]	acetone	mitochondria
ACGLPE[c]	1-acyl-sn-glycero-3-phosphoserine	cytoplasm
ACGLPE[e]	1-acyl-sn-glycero-3-phosphoserine	extracellular
ACGLU5PI[m]	N-acetyl-L-glutamyl 5-phosphate	mitochondria
ACLAC[c]	2-acetolactate	cytoplasm
ACLAC[m]	2-acetolactate	mitochondria
ACO[c]	cis-aconitate	cytoplasm
ACO[m]	cis-aconitate	mitochondria
ACOA[b]	acyl CoAs	plasma membrane
ACOOH[b]	carboxylate	plasma membrane
ACOOH[c]	carboxylate	cytoplasm
ACOOH[e]	carboxylate	extracellular
ACP[c]	acyl-carrier protein	cytoplasm
ACP[c][c]	1-aminocyclopropanecarboxylate	cytoplasm
ACP[m]	acyl-carrier protein	mitochondria
ACPC[b]	1-aminocyclopropanecarboxylate	plasma membrane
ACPC[c]	1-aminocyclopropanecarboxylate	cytoplasm
ACTAC[c]	acetoacetate	cytoplasm
ACYLPYR[c]	3-acylpyruvate	cytoplasm
ACYLPYR[m]	3-acylpyruvate	mitochondria
AD[c]	adenine	cytoplasm
ADCHOR[c]	4-amino-4-deoxychorismate	cytoplasm
ADCOBNM[c]	adenosylcobinamide	cytoplasm
ADMODO[b]	adenosylcobinamide	cytoplasm
ADMODO[c]	adenosylcobinamide	cytoplasm
ADN[c]	adenosine	cytoplasm
ADP[b]	ADP	plasma membrane
ADP[c]	ADP	cytoplasm
ADP[e]	ADP	extracellular
ADP[m]	ADP	mitochondria
ADP[p]	ADP	mitochondria
ADPGLC[c]	ADP-glucose	cytoplasm
ADPGLC[m]	ADP-glucose	mitochondria
ADPGLC[p]	ADP-glucose	mitochondria
ADPRIB[c]	5-deoxy-D-ribofuranos-5-yl-ADP	cytoplasm
AGMT[c]	agmatine	cytoplasm
AHHMD[c]	(2-amino-4-hydroxy-7,8-dihydropteridin-6-yl)methyl trihydrogen diphosphate	cytoplasm
AHHMP[c]	2-amino-6-(hydroxymethyl)-7,8-dihydropteridin-4-ol	cytoplasm
AHM[c]	4-amino-5-hydroxymethyl-2-methylpyrimidine	cytoplasm
AHMP[c]	4-amino-2-methyl-5-phosphomethylpyrimidine	cytoplasm
AHMPP[c]	4-amino-2-methyl-5-diphosphomethylpyrimidine	cytoplasm
AHTD[c]	7,8-dihydroneopterin 3'-triphosphate	cytoplasm
AHTD[m]	7,8-dihydroneopterin 3'-triphosphate	mitochondria
AICAR[c]	5-amino-1-(5-phospho-D-ribosyl)imidazole-4-carboxamide	cytoplasm
AIR[c]	5-amino-1-(5-phospho-D-ribosyl)imidazole	cytoplasm
AKA[c]	2-oxoadipate	cytoplasm
AKA[m]	2-oxoadipate	mitochondria
AKG[c]	2-oxoglutarate	cytoplasm
AKG[m]	2-oxoglutarate	mitochondria
AKG[p]	2-oxoglutarate	mitochondria
AKG[x]	2-oxoglutarate	peroxisome
AKP[c]	2-dehydropantoate	cytoplasm
AKP[m]	2-dehydropantoate	mitochondria
ALA[b]	L-alanine	plasma membrane
ALA[c]	L-alanine	cytoplasm
ALA[m]	L-alanine	mitochondria
ALA[p]	L-alanine	mitochondria
ALAGLY[b]	L-gamma-glutamyl-L-alanine	plasma membrane
ALAGLY[c]	L-gamma-glutamyl-L-alanine	plasma membrane
ALAGLY[p]	L-gamma-glutamyl-L-alanine	plasma membrane
ALTRNA[c]	L-arginyl-tRNA(Arg)	cytoplasm
ALTRNA[m]	L-arginyl-tRNA(Arg)	mitochondria
AMA[b]	L-2-aminoadipate	plasma membrane
AMA[c]	L-2-aminoadipate	cytoplasm
AMASA[b]	L-2-aminoadipate 6-semialdehyde	plasma membrane
AMASA[c]	L-2-aminoadipate 6-semialdehyde	cytoplasm
AMASA[m]	L-2-aminoadipate 6-semialdehyde	mitochondria
AMIACE[c]	aminoacetaldehyde	cytoplasm
AMIEVUL[c]	5-aminolevulinate	cytoplasm
AMIEVUL[m]	5-aminolevulinate	mitochondria
AMOXOBU[c]	5-aminolevulinate	mitochondria
AMOXOBU[m]	5-aminolevulinate	mitochondria
AMP[b]	AMP	plasma membrane
AMP[b]	AMP	plasma membrane
AMP[c]	AMP	cytoplasm
AMP[e]	AMP	cytoplasm
AMP[m]	AMP	mitochondria
AMP[p]	AMP	mitochondria
AN[c]	anthranilate	cytoplasm
AN[m]	anthranilate	mitochondria
AONA[c]	8-amino-7-oxononanoate	cytoplasm
AONA[m]	8-amino-7-oxononanoate	mitochondria
APEBU[c]	4-(2-Aminophenyl)-2,4-dioxobutanoate	cytoplasm
APEBU[m]	4-(2-Aminophenyl)-2,4-dioxobutanoate	cytoplasm
APHOPTRIN[c]	N-acetylphosphinothricin	cytoplasm
APOACP[c]	N-acetylphosphinothricin	cytoplasm
APOACP[e]	N-acetylphosphinothricin	cytoplasm
APOCARB[c]	apo-[carboxylase]	cytoplasm
APOCE[c]	apocytochrome C	cytoplasm
APOCE[m]	apocytochrome C	mitochondria
APOPROT[c]	apoprotein	cytoplasm
APPPA[c]	P1,P3-bis(5'-adenosyl) triphosphate	cytoplasm
APPPPA[c]	P1,P4-bis(5'-adenosyl) tetraphosphate	cytoplasm
APROA[c]	3-aminopropanal	cytoplasm
APRUT[c]	N-acetylputrescine	cytoplasm
APS[c]	5'-adenylyl sulfate	cytoplasm
APS[m]	5'-adenylyl sulfate	mitochondria
ARAB[c]	D-arabinose	cytoplasm
ARABLAC[c]	D-arabinono-1,4-lactone	cytoplasm
ARG[c]	L-arginine	cytoplasm
ARG[m]	L-arginine	mitochondria
ARG[p]	L-arginine	mitochondria
ARGSUCC[c]	N-(L-arginino)succinate	cytoplasm
ASCOBATE[c]	L-ascorbate	cytoplasm
ASCOBATE[e]	L-ascorbate	extracellular
ASCOBATE[m]	L-ascorbate	mitochondria
ASER[c]	O-acetyl-L-serine	cytoplasm
ASER[m]	O-acetyl-L-serine	mitochondria
ASN[c]	L-asparagine	cytoplasm
ASN[m]	L-asparagine	mitochondria
ASNTRNA[c]	L-asparaginyl-tRNA(Asn)	cytoplasm
ASNTRNA[m]	L-asparaginyl-tRNA(Asn)	mitochondria
ASP[c]	L-aspartate	cytoplasm
ASP[m]	L-aspartate	mitochondria
ASPERMD[c]	N1-acetylspermidine	cytoplasm
ASPSA[c]	L-aspartate 4-semialdehyde	cytoplasm
ASPSA[m]	L-aspartate 4-semialdehyde	mitochondria
ASPTRNA[c]	L-aspartyl-tRNA(Asp)	cytoplasm
ASUC[c]	N6-(1,2-dicarboxyethyl)-AMP	cytoplasm
AT3P2[c]	acylglycerone phosphates	cytoplasm
ATN[b]	allantoin	plasma membrane
ATN[c]	allantoin	cytoplasm
ATN[e]	allantoin	extracellular
ATP[b]	ATP	plasma membrane
ATP[c]	ATP	cytoplasm
ATP[e]	ATP	extracellular
ATP[m]	ATP	mitochondria
ATP[p]	ATP	mitochondria
ATT[c]	allantoate	cytoplasm
ATT[e]	allantoate	cytoplasm
ATT[x]	allantoate	peroxisome
bALA[m]	beta-alanine	mitochondria
BASP[c]	4-phospho-L-aspartate	cytoplasm
BCATE[b]	4-phospho-L-aspartate	cytoplasm
BCCP[c]	holo-[carboxylase]	cytoplasm
bDG6P[c]	beta-D-glucose 6-phosphate	cytoplasm
bDGLC[c]	beta-D-glucose	cytoplasm
bDGLC[e]	beta-D-glucose	extracellular
bDRIBN[c]	beta-D-glucose	extracellular
BETALD[c]	betaine aldehyde	cytoplasm
BETALD[e]	betaine aldehyde	extracellular
BIOMASS[c]	biomass	cytoplasm
BIOMASS[e]	biomass	extracellular
BT[c]	biotin	cytoplasm
BT[m]	biotin	mitochondria
BTAMP[c]	biotinyl-5'-AMP	cytoplasm
C100ACP[c]	decanoyl-[acp]	cytoplasm
C100COA[b]	decanoyl-CoA	plasma membrane
C100COA[c]	decanoyl-CoA	cytoplasm
C100COA[m]	decanoyl-CoA	mitochondria
C100COA[m]	decanoyl-CoA	mitochondria
C100COA[p]	decanoyl-CoA	mitochondria
C10DACP[c]	trans-dec-2-enoyl-[acp]	cytoplasm
C10DCOA[b]	trans-dec-2-enoyl-CoA	plasma membrane
C10DCOA[c]	trans-dec-2-enoyl-CoA	cytoplasm
C10DCOA[m]	trans-dec-2-enoyl-CoA	mitochondria
C10DCOA[p]	trans-dec-2-enoyl-CoA	mitochondria
C10HACP[c]	3-hydroxydecanoyl-[acp]	cytoplasm
C10HACP[m]	3-hydroxydecanoyl-[acp]	mitochondria
C10HCOA[c]	3-hydroxydecanoyl-CoA	cytoplasm
C10HCOA[m]	3-hydroxydecanoyl-CoA	mitochondria
C10OACP[c]	3-oxodecanoyl-[acp]	cytoplasm
C10OACP[m]	3-oxodecanoyl-[acp]	mitochondria
C10OCOA[m]	3-oxodecanoyl-CoA	mitochondria
C10OCOA[p]	3-oxodecanoyl-CoA	mitochondria
C120ACP[c]	lauroyl-[acp]	cytoplasm
C120CAR[b]	lauroyl-[acp]	cytoplasm
C120CAR[c]	dodecanoyl-carnitine	cytoplasm
C120CAR[m]	dodecanoyl-carnitine	mitochondria
C120COA[b]	lauroyl-CoA	plasma membrane
C120COA[c]	lauroyl-CoA	cytoplasm
C120COA[m]	lauroyl-CoA	mitochondria
C120COA[m]	lauroyl-CoA	mitochondria
C120COA[p]	lauroyl-CoA	mitochondria
C120DCOA[c]	trans-dodec-2-enoyl-CoA	cytoplasm
C120DCOA[m]	trans-dodec-2-enoyl-CoA	mitochondria
C120HCOA[c]	3-hydroxylauroyl-CoA	cytoplasm
C120HCOA[m]	3-hydroxylauroyl-CoA	mitochondria
C12CCOA[m]	cis-3-dodecenoyl-CoA	mitochondria
C12DACP[c]	trans-dodec-2-enoyl-[acp]	cytoplasm
C12DCOA[b]	trans-dodec-2-enoyl-CoA	plasma membrane
C12DCOA[c]	trans-dodec-2-enoyl-CoA	cytoplasm
C12DCOA[m]	trans-dodec-2-enoyl-CoA	mitochondria
C12DCOA[p]	trans-dodec-2-enoyl-CoA	mitochondria
C12HACP[c]	3-hydroxylauroyl-[acp]	cytoplasm
C12HACP[m]	3-hydroxylauroyl-[acp]	mitochondria
C12HCOA[c]	3-hydroxylauroyl-CoA	cytoplasm
C12HCOA[m]	3-hydroxylauroyl-CoA	mitochondria
C12OACP[c]	3-oxolauroyl-[acp]	cytoplasm
C12OACP[m]	3-oxolauroyl-[acp]	mitochondria
C12OCOA[m]	3-oxolauroyl-CoA	mitochondria
C12OCOA[p]	3-oxolauroyl-CoA	mitochondria
C140[c]	myristate	cytoplasm
C140ACP[c]	myristoyl-[acp]	cytoplasm
C140CAR[c]	myristoyl-Carnitine	cytoplasm
C140CAR[m]	myristoyl-Carnitine	mitochondria
C140COA[b]	myristoyl-CoA	plasma membrane
C140COA[c]	myristoyl-CoA	cytoplasm
C140COA[m]	myristoyl-CoA	mitochondria
C140COA[m]	myristoyl-CoA	mitochondria
C140COA[p]	myristoyl-CoA	mitochondria
C140DCOA[c]	trans-tetradec-2-enoyl-CoA	cytoplasm
C140DCOA[m]	trans-tetradec-2-enoyl-CoA	mitochondria
C140HCOA[c]	3-hydroxymyristoyl-CoA	cytoplasm
C140HCOA[m]	3-hydroxymyristoyl-CoA	mitochondria
C14DACP[c]	trans-tetradec-2-enoyl-[acp]	cytoplasm
C14DCOA[b]	trans-tetradec-2-enoyl-CoA	plasma membrane
C14DCOA[c]	trans-tetradec-2-enoyl-CoA	cytoplasm
C14DCOA[m]	trans-tetradec-2-enoyl-CoA	mitochondria
C14DCOA[p]	trans-tetradec-2-enoyl-CoA	mitochondria
C14HACP[c]	3-hydroxymyristoyl-[acp]	cytoplasm
C14HACP[m]	3-hydroxymyristoyl-[acp]	mitochondria
C14HCOA[c]	3-hydroxymyristoyl-CoA	cytoplasm
C14HCOA[m]	3-hydroxymyristoyl-CoA	mitochondria
C14OACP[c]	3-oxomyristoyl-[acp]	cytoplasm
C14OACP[m]	3-oxomyristoyl-[acp]	mitochondria
C14OCOA[m]	3-oxomyristoyl-CoA	mitochondria
C14OCOA[p]	3-oxomyristoyl-CoA	mitochondria
C160[b]	palmitate	plasma membrane
C160[c]	palmitate	cytoplasm
C160[e]	palmitate	extracellular
C160[m]	palmitate	mitochondria
C160ACP[c]	palmitoyl-[acp]	cytoplasm
C160CAR[c]	palmitoyl-carnitine	cytoplasm
C160CAR[m]	palmitoyl-carnitine	mitochondria
C160COA[b]	palmitoyl-CoA	plasma membrane
C160COA[c]	palmitoyl-CoA	cytoplasm
C160COA[m]	palmitoyl-CoA	mitochondria
C160COA[m]	palmitoyl-CoA	mitochondria
C160COA[p]	palmitoyl-CoA	mitochondria
C160DCOA[c]	trans-hexadec-2-enoyl-CoA	cytoplasm
C160DCOA[m]	trans-hexadec-2-enoyl-CoA	mitochondria
C160HCOA[c]	3-hydroxypalmitoyl-CoA	cytoplasm
C160HCOA[m]	3-hydroxypalmitoyl-CoA	mitochondria
C161[b]	hexadecenoate	plasma membrane
C161[c]	hexadecenoate	cytoplasm
C161[m]	hexadecenoate	mitochondria
C161ACP[c]	hexadecenoate	mitochondria
C161COA[b]	hexadecenoyl-CoA	plasma membrane
C161COA[c]	hexadecenoyl-CoA	cytoplasm
C161COA[m]	hexadecenoyl-CoA	mitochondria
C16A[m]	hexadecanal	mitochondria
C16DACP[c]	trans-hexadec-2-enoyl-[acp]	cytoplasm
C16DCOA[b]	trans-hexadec-2-enoyl-CoA	plasma membrane
C16DCOA[c]	trans-hexadec-2-enoyl-CoA	cytoplasm
C16DCOA[m]	trans-hexadec-2-enoyl-CoA	mitochondria
C16DCOA[p]	trans-hexadec-2-enoyl-CoA	mitochondria
C16HACP[c]	3-hydroxypalmitoyl-[acp]	cytoplasm
C16HACP[m]	3-hydroxypalmitoyl-[acp]	mitochondria
C16HCOA[c]	3-hydroxypalmitoyl-CoA	cytoplasm
C16HCOA[m]	3-hydroxypalmitoyl-CoA	mitochondria
C16OACP[c]	3-oxopalmitoyl-[acp]	cytoplasm
C16OACP[m]	3-oxopalmitoyl-[acp]	mitochondria
C16OCOA[m]	3-oxopalmitoyl-CoA	mitochondria
C16OCOA[p]	3-oxopalmitoyl-CoA	mitochondria
C180[b]	3-oxopalmitoyl-CoA	peroxisome
C180[c]	stearate	cytoplasm
C180[e]	stearate	extracellular
C180ACP[c]	stearoyl-[acp]	cytoplasm
C180CAR[c]	stearoyl-Carnitine	cytoplasm
C180CAR[m]	stearoyl-Carnitine	mitochondria
C180COA[b]	stearoyl-CoA	plasma membrane
C180COA[c]	stearoyl-CoA	cytoplasm
C180COA[m]	stearoyl-CoA	mitochondria
C181[b]	oleic acid	plasma membrane
C181[c]	oleic acid	cytoplasm
C181[e]	oleic acid	extracellular
C181[m]	oleic acid	mitochondria
C181ACP[c]	oleic acid	mitochondria
C181COA[b]	oleoyl-CoA	plasma membrane
C181COA[c]	oleoyl-CoA	cytoplasm
C181COA[m]	oleoyl-CoA	mitochondria
C182[b]	linoleate	plasma membrane
C182[c]	linoleate	cytoplasm
C182[e]	linoleate	extracellular
C182[m]	linoleate	mitochondria
C182ACP[c]	linoleate	mitochondria
C182COA[b]	linolenoyl-CoA	plasma membrane
C182COA[c]	linolenoyl-CoA	cytoplasm
C182COA[m]	linolenoyl-CoA	mitochondria
C183[b]	octadecatrienoic acid	plasma membrane
C183[c]	octadecatrienoic acid	cytoplasm
C183[e]	octadecatrienoic acid	extracellular
C183[m]	octadecatrienoic acid	mitochondria
C183ACP[c]	octadecatrienoic acid	mitochondria
C183COA[b]	octadecatrienoyl-CoA	plasma membrane
C183COA[c]	octadecatrienoyl-CoA	cytoplasm
C183COA[m]	octadecatrienoyl-CoA	mitochondria
C18DACP[c]	trans-octadec-2-enoyl-[acp]	cytoplasm
C18HACP[c]	3-hydroxystearoyl-[acp]	cytoplasm
C18HACP[m]	3-hydroxystearoyl-[acp]	mitochondria
C18OACP[c]	3-oxostearoyl-[acp]	cytoplasm
C18OACP[m]	3-oxostearoyl-[acp]	mitochondria
C18PSPG[b]	Delta8-phytosphingenine	plasma membrane
C40[b]	Delta8-phytosphingenine	plasma membrane
C40ACP[c]	butyryl-[acp]	cytoplasm
C40COA[b]	butyryl-CoA	plasma membrane
C40COA[c]	butyryl-CoA	cytoplasm
C40COA[m]	butyryl-CoA	mitochondria
C40COA[p]	butyryl-CoA	mitochondria
C4DACP[c]	trans-but-2-enoyl-[acp]	cytoplasm
C4DCOA[c]	trans-but-2-enoyl-CoA	cytoplasm
C4DCOA[m]	trans-but-2-enoyl-CoA	mitochondria
C4HACP[c]	3-hydroxybutyryl-[acp]	cytoplasm
C4HACP[m]	3-hydroxybutyryl-[acp]	mitochondria
C4HCOA[b]	(S)-3-hydroxybutanoyl-CoA	plasma membrane
C4HCOA[c]	(S)-3-hydroxybutanoyl-CoA	cytoplasm
C4HCOA[m]	(S)-3-hydroxybutanoyl-CoA	mitochondria
C4HCOA[p]	(S)-3-hydroxybutanoyl-CoA	mitochondria
C4HCOA_R[m]	(R)-3-hydroxybutanoyl-CoA	mitochondria
C60ACP[c]	hexanoyl-[acp]	cytoplasm
C60COA[b]	hexanoyl-CoA	plasma membrane
C60COA[c]	hexanoyl-CoA	cytoplasm
C60COA[m]	hexanoyl-CoA	mitochondria
C60COA[m]	hexanoyl-CoA	mitochondria
C60COA[p]	hexanoyl-CoA	mitochondria
C6DACP[c]	trans-hex-2-enoyl-[acp]	cytoplasm
C6DCOA[b]	trans-hex-2-enoyl-CoA	plasma membrane
C6DCOA[c]	trans-hex-2-enoyl-CoA	cytoplasm
C6DCOA[m]	trans-hex-2-enoyl-CoA	mitochondria
C6HACP[c]	3-hydroxyhexanoyl-[acp]	cytoplasm
C6HACP[m]	3-hydroxyhexanoyl-[acp]	mitochondria
C6HCOA[c]	3-hydroxyhexanoyl-CoA	cytoplasm
C6HCOA[m]	3-hydroxyhexanoyl-CoA	mitochondria
C6HCOA[p]	3-hydroxyhexanoyl-CoA	mitochondria
C6OACP[c]	3-oxohexanoyl-[acp]	cytoplasm
C6OACP[m]	3-oxohexanoyl-[acp]	mitochondria
C6OCOA[m]	3-oxohexanoyl-CoA	mitochondria
C6OCOA[p]	3-oxohexanoyl-CoA	mitochondria
C80ACP[c]	octanoyl-[acp]	cytoplasm
C80COA[b]	octanoyl-CoA	plasma membrane
C80COA[c]	octanoyl-CoA	cytoplasm
C80COA[m]	octanoyl-CoA	mitochondria
C80COA[m]	octanoyl-CoA	mitochondria
C80COA[p]	octanoyl-CoA	mitochondria
C8DACP[c]	trans-oct-2-enoyl-[acp]	cytoplasm
C8DCOA[b]	trans-oct-2-enoyl-CoA	plasma membrane
C8DCOA[c]	trans-oct-2-enoyl-CoA	cytoplasm
C8DCOA[m]	trans-oct-2-enoyl-CoA	mitochondria
C8DCOA[p]	trans-oct-2-enoyl-CoA	mitochondria
C8HACP[c]	3-hydroxyoctanoyl-[acp]	cytoplasm
C8HACP[m]	3-hydroxyoctanoyl-[acp]	mitochondria
C8HCOA[c]	3-hydroxyoctanoyl-CoA	cytoplasm
C8HCOA[m]	3-hydroxyoctanoyl-CoA	mitochondria
C8OACP[c]	3-oxooctanoyl-[acp]	cytoplasm
C8OACP[m]	3-oxooctanoyl-[acp]	mitochondria
C8OCOA[m]	3-oxooctanoyl-CoA	mitochondria
C8OCOA[p]	3-oxooctanoyl-CoA	mitochondria
Ca[m]	3-oxooctanoyl-CoA	peroxisome
CAASP[c]	N-carbamoyl-L-aspartate	cytoplasm
CABM[c]	carbamate	cytoplasm
CAFFCOA[c]	Caffeoyl-CoA	cytoplasm
CAFFCOA[m]	Caffeoyl-CoA	mitochondria
CAIR[c]	1-(5-phospho-D-ribosyl)-5-amino-4-imidazolecarboxylate	cytoplasm
CALH[c]	2-(3-amino-3-carboxypropyl)-L-histidine	cytoplasm
cAMP[b]	3',5'-cyclic AMP	plasma membrane
cAMP[c]	3',5'-cyclic AMP	cytoplasm
CAP[c]	carbamoyl phosphate	cytoplasm
CAP[e]	carbamoyl phosphate	extracellular
CAP[m]	carbamoyl phosphate	mitochondria
CAR[b]	carbamoyl phosphate	mitochondria
CAR[c]	carnitine	cytoplasm
CAR[m]	carnitine	mitochondria
CARBO[c]	monocarboxylic acid anion	cytoplasm
CBCCP[c]	carboxybiotin-carboxyl-carrier protein	cytoplasm
CBHCAP[c]	3-isopropylmalate	cytoplasm
CBHCAP[m]	3-isopropylmalate	cytoplasm
CCANOL[c]	cycloartenol	cytoplasm
CCECNOL[b]	cycloeucalenol	plasma membrane
CCECNOL[c]	cycloeucalenol	cytoplasm
CDP[c]	CDP	cytoplasm
CDP[m]	CDP	mitochondria
CDPCHO[c]	CDP-choline	cytoplasm
CDPDG[b]	CDP-diacylglycerols	plasma membrane
CDPETN[c]	CDP-ethanolamine	cytoplasm
CELLOB[b]	CDP-ethanolamine	cytoplasm
CELLOB[c]	cellobiose	cytoplasm
CELLOB[e]	cellobiose	extracellular
CELLU[b]	cellobiose	extracellular
CELLU[e]	cellulose	extracellular
CER1[b]	ceramides	plasma membrane
CER1[c]	ceramides	cytoplasm
CER1[e]	ceramides	extracellular
CER2[b]	dihydroceramides	plasma membrane
CER2[e]	dihydroceramides	extracellular
CER3[b]	dihydroceramides	extracellular
CER3[e]	phytoceramides	extracellular
CGLY[b]	L-cysteinylglycine	plasma membrane
CGLY[c]	L-cysteinylglycine	cytoplasm
CGLY[p]	L-cysteinylglycine	cytoplasm
cGMP[b]	3',5'-cyclic GMP	plasma membrane
cGMP[c]	3',5'-cyclic GMP	cytoplasm
CHCOA[c]	pimeloyl-CoA	cytoplasm
CHCOA[m]	pimeloyl-CoA	mitochondria
CHIB[b]	chitobiose	plasma membrane
CHIB[c]	chitobiose	cytoplasm
CHIB[e]	chitobiose	extracellular
CHIBDPD[c]	chitobiosyldiphosphodolichol	cytoplasm
CHIT[b]	chitin	plasma membrane
CHIT[c]	chitin	cytoplasm
CHIT[e]	chitin	extracellular
CHIT[m]	chitin	extracellular
CHITO[c]	chitosan	cytoplasm
CHITO[e]	chitosan	extracellular
CHO[b]	chitosan	extracellular
CHO[c]	choline	cytoplasm
CHO[e]	choline	extracellular
CHO[m]	choline	mitochondria
CHOR[c]	chorismate	cytoplasm
CHOR[m]	chorismate	mitochondria
CIT[c]	citrate	cytoplasm
CIT[m]	citrate	mitochondria
CITR[c]	L-citrulline	cytoplasm
CITR[m]	L-citrulline	mitochondria
CITR[p]	L-citrulline	mitochondria
CL[b]	cardiolipin	plasma membrane
CLCDPDG[b]	Cdp-diacylglycerol used for cardiolipin	plasma membrane
CLCDPDG[e]	Cdp-diacylglycerol used for cardiolipin	extracellular
CLCDPDG[m]	Cdp-diacylglycerol used for cardiolipin	mitochondria
CLPIGP[c]	3(3-sn-phosphatidyl)-sn-glycerol 1-phosphate used for cardiolipin biosynthesis	cytoplasm
CLPIGP[e]	3(3-sn-phosphatidyl)-sn-glycerol 1-phosphate used for cardiolipin biosynthesis	extracellular
CLPIGP[m]	3(3-sn-phosphatidyl)-sn-glycerol 1-phosphate used for cardiolipin biosynthesis	mitochondria
CMP[b]	CMP	plasma membrane
CMP[c]	CMP	cytoplasm
CMP[e]	CMP	extracellular
CMP[m]	CMP	mitochondria
CMUSA[c]	2-amino-3-carboxymuconate semialdehyde	cytoplasm
CO2[b]	CO2	plasma membrane
CO2[c[c]	CO2	plasma membrane
CO2[c]	CO2	cytoplasm
CO2[e]	CO2	extracellular
CO2[m]	CO2	mitochondria
CO2[x]	CO2	peroxisome
COA[b]	coenzyme A	plasma membrane
COA[b]	coenzyme A	plasma membrane
COA[c]	coenzyme A	cytoplasm
COA[e]	coenzyme A	cytoplasm
COA[m]	coenzyme A	mitochondria
COA[p]	coenzyme A	mitochondria
COBNM[c]	cobinamide	cytoplasm
CPAD5P[c]	1-(2-carboxyphenylamino)-1-deoxy-D-ribulose 5-phosphate	cytoplasm
CPGIII[c]	coproporphyrinogen III	cytoplasm
CPGIII[m]	coproporphyrinogen III	mitochondria
CRONYLCOA[c]	crotonoyl-CoA	cytoplasm
CRONYLCOA[m]	crotonoyl-CoA	mitochondria
CTP[b]	CTP	plasma membrane
CTP[c]	CTP	cytoplasm
CTP[m]	CTP	mitochondria
CYMEC[c]	holocytochrome c	cytoplasm
CYMEC[m]	holocytochrome c	mitochondria
CYNE[c]	cyanate	cytoplasm
CYS[c]	L-cysteine	cytoplasm
CYS[m]	L-cysteine	mitochondria
CYSTE[c]	L-cysteate	cytoplasm
CYSTE[m]	L-cysteate	mitochondria
CYTD[b]	cytidine	plasma membrane
CYTD[c]	cytidine	cytoplasm
CYTD[e]	cytidine	extracellular
CYTD[m]	cytidine	mitochondria
CYTS[c]	cytosine	cytoplasm
CYTS[m]	cytosine	mitochondria
D45PI[b]	1-phosphatidyl-1D-myo-inositol 4,5-bisphosphates	plasma membrane
D45PI[c]	1-phosphatidyl-1D-myo-inositol 4,5-bisphosphates	cytoplasm
D45PI[m]	1-phosphatidyl-1D-myo-inositol 4,5-bisphosphates	mitochondria
D6PGC[c]	6-phospho-D-gluconate	cytoplasm
D6PGC[e]	6-phospho-D-gluconate	cytoplasm
D6PGL[c]	6-O-phosphono-D-glucono-1,5-lactone	cytoplasm
D6PGL[e]	6-O-phosphono-D-glucono-1,5-lactone	cytoplasm
D6RP5P[c]	2,5-diamino-6-hydroxy-4-(5'-phosphoribosylamino)-pyrimidine	cytoplasm
D8RL[c]	6,7-dimethyl-8-(1-D-ribityl)lumazine	cytoplasm
DA[c]	deoxyadenosine	cytoplasm
DA[m]	deoxyadenosine	mitochondria
DADP[c]	dADP	cytoplasm
DADP[m]	dADP	mitochondria
DAGLY[b]	dADP	mitochondria
DAGLY[c]	diglycerides	cytoplasm
DAGLY[e]	diglycerides	extracellular
DAGLY[m]	diglycerides	mitochondria
DAGLYP[b]	1,2-diacylglycerol 3-phosphate	plasma membrane
DAGLYP[c]	1,2-diacylglycerol 3-phosphate	cytoplasm
DAMP[c]	dAMP	cytoplasm
DAMP[m]	dAMP	mitochondria
DANNA[c]	7,8-diaminononanoate	cytoplasm
DASP[c]	D-aspartate	cytoplasm
DASP[e]	D-aspartate	extracellular
DATP[c]	dATP	cytoplasm
DATP[m]	dATP	mitochondria
DB4P[c]	2-hydroxy-3-oxobutyl phosphate	cytoplasm
DC[c]	deoxycytidine	cytoplasm
DC[e]	deoxycytidine	extracellular
DCDP[c]	dCDP	cytoplasm
DCDP[m]	dCDP	mitochondria
DCMP[c]	dCMP	cytoplasm
DCMP[m]	dCMP	mitochondria
DCTP[c]	dCTP	cytoplasm
DCTP[m]	dCTP	mitochondria
DEHXG[c]	3-dehydro-2-deoxy-D-gluconate	cytoplasm
DEHXG[e]	3-dehydro-2-deoxy-D-gluconate	extracellular
DEHXG[m]	3-dehydro-2-deoxy-D-gluconate	mitochondria
DEORIPI[c]	2-deoxy-D-ribose 5-phosphate	cytoplasm
DEXG[c]	2-deoxy-D-gluconic acid	cytoplasm
DEXG[e]	2-deoxy-D-gluconic acid	extracellular
DEXG[m]	2-deoxy-D-gluconic acid	mitochondria
DG[c]	deoxyguanosine	cytoplasm
DGALNT[e]	deoxyguanosine	cytoplasm
DGDP[c]	dGDP	cytoplasm
DGDP[m]	dGDP	mitochondria
DGLC[c]	D-glucose	cytoplasm
DGLC[e]	D-glucose	extracellular
DGMP[c]	dGMP	cytoplasm
DGTP[c]	dGTP	cytoplasm
DGTP[m]	dGTP	mitochondria
DHBOPRIN[c]	6,7-dihydropteridine	cytoplasm
DHBZA[c]	6,7-dihydropteridine	cytoplasm
DHF[c]	dihydrofolate	cytoplasm
DHF[m]	dihydrofolate	mitochondria
DHMVA[c]	(R)-2,3-dihydroxy-3-methylbutanoate	cytoplasm
DHMVA[m]	(R)-2,3-dihydroxy-3-methylbutanoate	mitochondria
DHP[c]	7,8-dihydroneopterin	cytoplasm
DHPT[c]	dihydropteroate	cytoplasm
DHPT[m]	dihydropteroate	mitochondria
DHSK[b]	dihydropteroate	mitochondria
DHSK[c]	3-dehydroshikimate	cytoplasm
DHSK[m]	3-dehydroshikimate	mitochondria
DHSP[b]	sphinganine 1-phosphate	plasma membrane
DHSP[c]	sphinganine 1-phosphate	cytoplasm
DHSP[m]	sphinganine 1-phosphate	mitochondria
DHSPH[b]	3-dehydrosphinganine	plasma membrane
DHSPH[c]	3-dehydrosphinganine	cytoplasm
DHSPH[m]	3-dehydrosphinganine	mitochondria
DHVAL[c]	(R)-3-hydroxy-3-methyl-2-oxobutanoate	cytoplasm
DHVAL[m]	(R)-3-hydroxy-3-methyl-2-oxobutanoate	mitochondria
DHYXPENT[c]	1,2-dihydroxy-5-(methylthio)pent-1-en-3-on	cytoplasm
DIDIPC[c]	(S)-2,3-dihydrodipicolinate	cytoplasm
DIMGP[c]	D-erythro-1-(imidazol-4-yl)glycerol 3-phosphate	cytoplasm
DIMP[c]	dIMP	cytoplasm
DIN[c]	deoxyinosine	cytoplasm
DITP[c]	dITP	cytoplasm
DMNAD[c]	deamido-NAD(+)	cytoplasm
DMPP[c]	dimethylallyl diphosphate	cytoplasm
DMSTL[c]	Desmosterol	cytoplasm
DNA[c]	DNA	cytoplasm
DNACYS[c]	DNA containing cytosine	cytoplasm
DNAMCYS[c]	DNA containing 5-methylcytosine	cytoplasm
DOLDLS[b]	dolichyl diphosphooligosaccharide	plasma membrane
DOLDP[c]	dolichyl diphosphate	cytoplasm
DOLGPI[b]	dolichyl beta-D-glucosyl phosphate	plasma membrane
DOLMANP[b]	dolichyl beta-D-mannosyl phosphate	plasma membrane
DOLMANP[c]	dolichyl beta-D-mannosyl phosphate	cytoplasm
DOLP[b]	dolichyl phosphate	plasma membrane
DOLP[c]	dolichyl phosphate	cytoplasm
DOROA[c]	(S)-dihydroorotate	cytoplasm
DOROA[m]	(S)-dihydroorotate	mitochondria
DPCOA[c]	dephospho-CoA	cytoplasm
DPCOA[m]	dephospho-CoA	mitochondria
DPTH[c]	-2[3-carboxy-3-(methylammonio)propyl]-L-histidine	cytoplasm
DQT[b]	-2[3-carboxy-3-(methylammonio)propyl]-L-histidine	cytoplasm
DQT[c]	3-dehydroquinate	cytoplasm
DR1P[c]	2-deoxyribose 1-phosphate	cytoplasm
DSAM[c]	S-adenosylmethioninamine	cytoplasm
DSER[c]	D-serine	cytoplasm
DT[c]	thymidine	cytoplasm
DTB[c]	dethiobiotin	cytoplasm
DTB[m]	dethiobiotin	mitochondria
DTDP[b]	dethiobiotin	mitochondria
DTDP[c]	dTDP	cytoplasm
DTDP[m]	dTDP	mitochondria
DTMP[b]	dTDP	mitochondria
DTMP[c]	dTMP	cytoplasm
DTTP[c]	dTTP	cytoplasm
DTTP[m]	dTTP	mitochondria
DU[c]	deoxyuridine	cytoplasm
DU[e]	deoxyuridine	extracellular
DUDP[c]	dUDP	cytoplasm
DUDP[m]	dUDP	mitochondria
DUMP[c]	dUMP	cytoplasm
DUMP[e]	dUMP	cytoplasm
DUMP[m]	dUMP	mitochondria
DUTP[c]	dUTP	cytoplasm
DUTP[m]	dUTP	mitochondria
E4P[c]	D-erythrose 4-phosphate	cytoplasm
ECYS[m]	cysteine-[enzyme]	mitochondria
EPST[b]	episterol	plasma membrane
EPST[c]	episterol	cytoplasm
ERGOSE[c]	sterol ester	cytoplasm
ERGOST[c]	ergosterol	cytoplasm
ERGOTET[c]	5,7,22,24(28)-Ergostatetraenol	cytoplasm
ERGOTRI[c]	5,7,24(28)-Ergostatrienol	cytoplasm
ESULFCYS[m]	S-sulfanylcysteine-[enzyme]	mitochondria
ETH[c]	ethanol	cytoplasm
ETH[m]	ethanol	mitochondria
ETHAM[b]	ethanolamine	plasma membrane
ETHAM[c]	ethanolamine	cytoplasm
F26P[c]	D-fructose 2,6-bisphosphate	cytoplasm
F6P[b]	D-fructose 6-phosphate	plasma membrane
F6P[c]	D-fructose 6-phosphate	cytoplasm
FAD[b]	D-fructose 6-phosphate	cytoplasm
FAD[c]	FAD	cytoplasm
FAD[m]	FAD	mitochondria
FADH2[b]	FAD	mitochondria
FADH2[c]	FAD	mitochondria
FADH2[m]	FADH2	mitochondria
FALD[c]	formaldehyde	cytoplasm
FALD[e]	formaldehyde	extracellular
FALD[m]	formaldehyde	mitochondria
FDP[c]	beta-D-fructofuranose 1,6-bisphosphate	cytoplasm
FE[c]	Fe2+	cytoplasm
FE[m]	Fe2+	mitochondria
FERI[b]	ferricytochrome c	plasma membrane
FERI[c]	ferricytochrome c	cytoplasm
FERI[e]	ferricytochrome c	cytoplasm
FERI[m]	ferricytochrome c	mitochondria
FERI[m]	ferricytochrome c	mitochondria
FERO[b]	ferrocytochrome c	plasma membrane
FERO[c]	ferrocytochrome c	cytoplasm
FERO[e]	ferrocytochrome c	cytoplasm
FERO[m]	ferrocytochrome c	mitochondria
FERRIB5[b[c]	ferrocytochrome c	mitochondria
FERRIB5[b]	ferrocytochrome c	mitochondria
FERRIB5[c]	ferricytochrome b5	cytoplasm
FERROB5[b]	ferricytochrome b5	cytoplasm
FERROB5[c]	ferrocytochrome b5	cytoplasm
FERYLCOA[m]	feruloyl-CoA	mitochondria
FEST[c]	fecosterol	cytoplasm
FFA[c]	free fatty acid	cytoplasm
FGAM[c]	2-formamido-N(1)-(5-phospho-D-ribosyl)acetamidine	cytoplasm
FGAR[c]	N(2)-formyl-N(1)-(5-phospho-D-ribosyl)glycinamide	cytoplasm
FGT[c]	S-formylglutathione	cytoplasm
FKYN[c]	L-formylkynurenine	cytoplasm
FKYN[e]	L-formylkynurenine	cytoplasm
FMN[c]	FMN	cytoplasm
FMNH2[c]	FMN	cytoplasm
FOFMET[c]	N-formylmethionyl-tRNA(fMet)	cytoplasm
FOFMET[m]	N-formylmethionyl-tRNA(fMet)	mitochondria
FOR[c]	formate	cytoplasm
FOR[e]	formate	extracellular
FOR[m]	formate	mitochondria
FPP[c]	2-trans,6-trans-farnesyl diphosphate	cytoplasm
FRU[b]	D-fructose	plasma membrane
FRU[c]	D-fructose	cytoplasm
FRU[e]	D-fructose	extracellular
FRU[m]	D-fructose	mitochondria
FRU[p]	D-fructose	mitochondria
FRU1P[b]	D-fructose 1-phosphate	plasma membrane
FRU1P[c]	D-fructose 1-phosphate	cytoplasm
FTHF[c]	10-formyltetrahydrofolate	cytoplasm
FTHF[m]	10-formyltetrahydrofolate	mitochondria
FUACAC[c]	4-fumarylacetoacetate	cytoplasm
FUCUL1P[c]	L-fuculose 1-phosphate	cytoplasm
FUCUL1P[m]	L-fuculose 1-phosphate	mitochondria
FUM[c]	fumarate	cytoplasm
FUM[m]	fumarate	mitochondria
G1P[c]	alpha-D-glucose 1-phosphate	cytoplasm
G1P[e]	alpha-D-glucose 1-phosphate	extracellular
G6P[b]	alpha-D-glucose 6-phosphate	plasma membrane
G6P[c]	alpha-D-glucose 6-phosphate	cytoplasm
GA1P[c]	alpha-D-glucosamine 1-phosphate	cytoplasm
GA6P[b]	D-glucosamine 6-phosphate	plasma membrane
GA6P[c]	D-glucosamine 6-phosphate	cytoplasm
GABA[c]	gamma-aminobutyrate	cytoplasm
GABA[m]	gamma-aminobutyrate	mitochondria
GABA[p]	gamma-aminobutyrate	mitochondria
GABAL[c]	4-aminobutanal	cytoplasm
GAL1P[c]	alpha-D-galactose 1-phosphate	cytoplasm
GALNT[c]	D-galactonate	cytoplasm
GALUNT[e]	D-galacturonate	extracellular
GAR[c]	N(1)-(5-phospho-D-ribosyl)glycinamide	cytoplasm
GASCER[e]	N(1)-(5-phospho-D-ribosyl)glycinamide	cytoplasm
GC[c]	gamma-L-glutamyl-L-cysteine	cytoplasm
GCATE[b]	gamma-L-glutamyl-L-cysteine	cytoplasm
GDP[b]	GDP	plasma membrane
GDP[c]	GDP	cytoplasm
GDP[m]	GDP	mitochondria
GDPDDMAN[c]	GDP-4-dehydro-6-deoxy-D-mannose	cytoplasm
GDPFUC[c]	GDP-L-fucose	cytoplasm
GDPMAN[b]	GDP-mannose	plasma membrane
GDPMAN[c]	GDP-mannose	cytoplasm
GDPMAN[m]	GDP-mannose	mitochondria
GEN[c]	Gensitate (2,5-dihydroxybenzoate )	cytoplasm
GGPP[b]	Gensitate (2,5-dihydroxybenzoate )	cytoplasm
GGPP[c]	geranylgeranyl diphosphate	cytoplasm
GL[b]	glycerol	plasma membrane
GL[c]	glycerol	cytoplasm
GL[e]	glycerol	extracellular
GL[m]	glycerol	mitochondria
GL3P[b]	sn-glycerol 3-phosphate	plasma membrane
GL3P[c]	sn-glycerol 3-phosphate	cytoplasm
GL3P[e]	sn-glycerol 3-phosphate	extracellular
GL3P[m]	sn-glycerol 3-phosphate	mitochondria
GLAC[b]	D-galactose	plasma membrane
GLAC[c]	D-galactose	cytoplasm
GLAC[e]	D-galactose	extracellular
GLACMYOI[e]	alpha-D-galactosyl-(1->3)-1D-myo-inositol	extracellular
GLAL[c]	glycoaldehyde	cytoplasm
GLAL[x]	glycoaldehyde	peroxisome
GLC[b]	alpha-D-glucose	plasma membrane
GLC[c]	alpha-D-glucose	cytoplasm
GLC[e]	alpha-D-glucose	extracellular
GLC[p]	alpha-D-glucose	extracellular
GLCAADPP[b]	D-Glc-alpha-(1->3)-D-Man-alpha-(1->2)-D-Man-alpha-(1->2)-D-Man-alpha-(1->3)-[D-Man-alpha-(1->2)-D-Man-alpha-(1->3)-[D-Man-alpha-(1->2)-D-Man-alpha-(1->6)]-D-Man-alpha-(1->6)]-D-Man-beta-(1->4)-D-GlcNAc-beta-(1->4)-D-GlcNAc-diphosphodolichol	plasma membrane
GLCADP[b]	D-Glc-alpha-(1->3)-D-Glc-alpha-(1->3)-D-Man-alpha-(1->2)-D-Man-alpha-(1->2)-D-Man-alpha-(1->3)-[D-Man-alpha-(1->2)-D-Man-alpha-(1->3)-D-Man-alpha-(1->2)-D-Man-alpha-(1->6)]-D-Man-alpha-(1->6)]-D-Man-beta-(1->4)-D-GlcNAc-beta-(1->4)-D-GlcNAc-diphosphodolichol	plasma membrane
GLCADPP[b]	D-Glc-alpha-(1->2)-D-Glc-alpha-(1->3)-D-Glc-alpha-(1->3)-D-Man-alpha-(1->2)-D-Man-alpha-(1->2)-D-Man-alpha-(1->3)-[D-Man-alpha-(1->2)-D-Man-alpha-(1->3)-[D-Man-alpha-(1->2)-D-Man-alpha-(1->6)]-D-Man-alpha-(1->6)]-D-Man-beta-(1->4)-D-GlcNAc-beta-(1->4)-D-GlcNAc-diphosphodolichol	plasma membrane
GLCLACNE[c]	D-gluconolactone	cytoplasm
GLCLACNE[e]	D-gluconolactone	extracellular
GLCMNIDE[e]	Glucosaminide	extracellular
GLCN[b]	D-glucosamine	plasma membrane
GLCN[c]	D-glucosamine	cytoplasm
GLCNT[c]	D-gluconate	cytoplasm
GLCOL[c]	D-glucitol	cytoplasm
GLCOL[e]	D-glucitol	extracellular
GLCPASN[b]	a glycoprotein with the oligosaccharide chain attached by N-beta-D-glycosyl linkage to a protein L-asparagine	plasma membrane
GLN[c]	L-glutamine	cytoplasm
GLN[e]	L-glutamine	extracellular
GLN[m]	L-glutamine	mitochondria
GLTCOA[c]	glutaryl-CoA	cytoplasm
GLTCOA[m]	glutaryl-CoA	mitochondria
GLU[b]	L-glutamate	plasma membrane
GLU[c]	L-glutamate	cytoplasm
GLU[e]	L-glutamate	extracellular
GLU[m]	L-glutamate	mitochondria
GLU[p]	L-glutamate	mitochondria
GLUCN[e]	D-glucuronate	extracellular
GLUCRE[b]	beta-D-glucosiduronic acids	plasma membrane
GLUCRE[c]	beta-D-glucosiduronic acids	cytoplasm
GLUCRE[m]	beta-D-glucosiduronic acids	mitochondria
GLUCRE[p]	beta-D-glucosiduronic acids	mitochondria
GLUGSAL[c]	L-glutamate 5-semialdehyde	cytoplasm
GLUGSAL[m]	L-glutamate 5-semialdehyde	mitochondria
GLUP[b]	D-alpha-glutamyl phosphate	plasma membrane
GLUP[c]	D-alpha-glutamyl phosphate	cytoplasm
GLUP[m]	D-alpha-glutamyl phosphate	mitochondria
GLX[b]	D-alpha-glutamyl phosphate	mitochondria
GLX[c]	glyoxylate	cytoplasm
GLX[c]	glyoxylate	cytoplasm
GLX[e]	glyoxylate	cytoplasm
GLX[m]	glyoxylate	mitochondria
GLX[p]	glyoxylate	mitochondria
GLY[c]	glycine	cytoplasm
GLY[m]	glycine	mitochondria
GLY[m]	glycine	mitochondria
GLYAL[c]	D-glyceraldehyde	cytoplasm
GLYAL[e]	D-glyceraldehyde	extracellular
GLYAL[m]	D-glyceraldehyde	mitochondria
GLYBET[c]	D-glyceraldehyde	mitochondria
GLYCEROCHO[b]	Glycerophosphocholine	plasma membrane
GLYCEROCHO[c]	Glycerophosphocholine	cytoplasm
GLYCEROETM[b]	Glycerophosphoethanolamine	plasma membrane
GLYCEROETM[c]	Glycerophosphoethanolamine	cytoplasm
GLYCODEX[c]	limited dextrin-[glycogen phosphorylase]	cytoplasm
GLYCODEX[e]	limited dextrin-[glycogen phosphorylase]	extracellular
GLYCOLA[c]	glycolate	cytoplasm
GLYCTE[c]	glycerate	cytoplasm
GLYCTE[m]	glycerate	mitochondria
GLYLCR[b]	Glucosyl-ceramide	plasma membrane
GLYN[c]	glycerone	cytoplasm
GLYNIN[c]	glycogenin	cytoplasm
GLYNIN[m]	glycogenin	mitochondria
GLYNIN[p]	glycogenin	mitochondria
GLYTRNA[c]	glycyl-tRNA(Gly)	cytoplasm
GMP[b]	GMP	plasma membrane
GMP[c]	GMP	cytoplasm
GN[c]	guanine	cytoplasm
GN[e]	guanine	extracellular
GPP[c]	geranyl diphosphate	cytoplasm
GSN[c]	guanosine	cytoplasm
GTP[b]	GTP	plasma membrane
GTP[c]	GTP	cytoplasm
GTP[m]	GTP	mitochondria
GULACNE[m]	L-gulono-1,4-lactone	mitochondria
H[m]	H(+)	mitochondria
H_PO[b]	H(+)	plasma membrane
H_PO[c]	H(+)	cytoplasm
H_PO[e]	H(+)	extracellular
H_PO[m]	H(+)	mitochondria
H2O[b]	H2O	plasma membrane
H2O[c]	H2O	cytoplasm
H2O[c]	H2O	cytoplasm
H2O[c]	H2O	cytoplasm
H2O[e]	H2O	extracellular
H2O[m]	H2O	mitochondria
H2O[p]	H2O	mitochondria
H2O[x]	H2O	peroxisome
H2O2[b]	hydrogen peroxide	plasma membrane
H2O2[c]	hydrogen peroxide	cytoplasm
H2O2[c]	hydrogen peroxide	cytoplasm
H2O2[e]	hydrogen peroxide	extracellular
H2O2[m]	hydrogen peroxide	mitochondria
H2O2[p]	hydrogen peroxide	mitochondria
H2O2[x]	hydrogen peroxide	peroxisome
H2S[c]	H2S	cytoplasm
H2S[m]	H2S	mitochondria
H2SO3[c]	sulfite	cytoplasm
H2SO3[e]	sulfite	extracellular
H2SO3[m]	sulfite	mitochondria
H3MCOA[c]	(S)-3-hydroxy-3-methylglutaryl-CoA	cytoplasm
H3MCOA[m]	(S)-3-hydroxy-3-methylglutaryl-CoA	mitochondria
HAN[c]	3-hydroxyanthranilate	cytoplasm
HBZA[b]	3-hydroxyanthranilate	cytoplasm
HCIT[c]	homocitrate	cytoplasm
HCIT[m]	homocitrate	mitochondria
HCO3[c]	HCO3	cytoplasm
HCO3[e]	HCO3	extracellular
HCO3[m]	HCO3	mitochondria
HCO3[p]	HCO3	mitochondria
HCYS[c]	L-homocysteine	cytoplasm
HCYS[m]	L-homocysteine	mitochondria
HEME_A[b]	heme A	plasma membrane
HEME_O[b]	heme O	plasma membrane
HHTRNA[c]	L-histidyl-tRNA(His)	cytoplasm
HICIT[c]	homoisocitrate	cytoplasm
HIS[c]	L-histidine	cytoplasm
HISLYS[c]	histone L-lysine	cytoplasm
HISOL[c]	L-histidinol	cytoplasm
HISOLP[c]	L-histidinol phosphate	cytoplasm
HIURTE[b]	5-hydroxyisourate	plasma membrane
HIURTE[c]	5-hydroxyisourate	cytoplasm
HIURTE[e]	5-hydroxyisourate	extracellular
HIURTE[p]	5-hydroxyisourate	extracellular
HIURTE[x]	5-hydroxyisourate	peroxisome
HKYN[c]	3-hydroxykynurenine	cytoplasm
HKYN[m]	3-hydroxykynurenine	mitochondria
HMTB[c]	hydroxymethylbilane	cytoplasm
HMTB[m]	hydroxymethylbilane	mitochondria
HNO2[c]	nitrite	cytoplasm
HNO2[m]	nitrite	mitochondria
HNO3[c]	nitrate	cytoplasm
HNO3[e]	nitrate	extracellular
HNO3[m]	nitrate	mitochondria
HOACP[c]	nitrate	mitochondria
HOACP[e]	nitrate	mitochondria
HOMOGEN[c]	homogentisate	cytoplasm
HPLPNBZA[b]	homogentisate	cytoplasm
HSER[c]	L-homoserine	cytoplasm
HSER[m]	L-homoserine	mitochondria
HTET[c]	L-homoserine	mitochondria
HTMLS[m]	3-hydroxy-N6,N6,N6-trimethyl-L-lysine	mitochondria
HX[b]	HX	plasma membrane
HX[c]	HX	cytoplasm
HXPYR[c]	Hydroxypyruvate	cytoplasm
HYDGLR[m]	(S)-2-hydroxyglutarate	mitochondria
HYGTA[c]	S-(hydroxymethyl)glutathione	cytoplasm
HYHYPREATE[c]	2-Hydroxy-3-(4-hydroxyphenyl)propenoate	cytoplasm
HYISOBYCOA[b]	(S)-3-hydroxy-isobutyryl-CoA	plasma membrane
HYISOBYCOA[c]	(S)-3-hydroxy-isobutyryl-CoA	cytoplasm
HYISOBYCOA[m]	(S)-3-hydroxy-isobutyryl-CoA	mitochondria
HYISOBYR[b]	(S)-3-hydroxy-isobutyrate	plasma membrane
HYISOBYR[m]	(S)-3-hydroxy-isobutyrate	mitochondria
HYISOCOA[c]	(S)-3-hydroxy-isobutyrate	mitochondria
HYISOCOA[m]	(S)-3-hydroxy-isobutyrate	mitochondria
HYISORATE[c]	(S)-3-hydroxy-isobutyrate	mitochondria
HYISORATE[m]	(S)-3-hydroxy-isobutyrate	mitochondria
HYPRO[m]	trans-4-hydroxy-L-proline	mitochondria
HYTTHBOTR[c]	4a-hydroxytetrahydrobiopterin	cytoplasm
HYXN[c]	hypoxanthine	cytoplasm
ICIT[b]	hypoxanthine	cytoplasm
ICIT[c]	isocitrate	cytoplasm
ICIT[m]	isocitrate	mitochondria
ICIT[p]	isocitrate	mitochondria
ICIT[x]	isocitrate	peroxisome
ICZYMST[c]	4-Methylzymosterol-carboxylate	cytoplasm
IDP[c]	IDP	cytoplasm
IDP[m]	IDP	mitochondria
IGP[c]	1-(indol-3-yl)glycerol 3-phosphate	cytoplasm
IIZYMST[c]	intermediate zymosterol II	cytoplasm
ILE[c]	L-isoleucine	cytoplasm
ILE[m]	L-isoleucine	mitochondria
IMACP[c]	3-(imidazol-4-yl)-2-oxopropyl phosphate	cytoplasm
IMP[c]	IMP	cytoplasm
IMP[m]	IMP	mitochondria
INS[c]	inosine	cytoplasm
IPPMAL[c]	2-isopropylmalate	cytoplasm
IPPMAL[m]	2-isopropylmalate	mitochondria
IPPP[c]	isopentenyl diphosphate	cytoplasm
ISOBUCOA[c]	isobutyryl-CoA	cytoplasm
ISOBUCOA[m]	isobutyryl-CoA	mitochondria
ISOVACOA[m]	3-isovaleryl-CoA	mitochondria
ITP[c]	ITP	cytoplasm
ITP[m]	ITP	mitochondria
KEMYOI[c]	2-keto-myo-inositol	cytoplasm
KYN[c]	L-kynurenine	cytoplasm
KYN[e]	L-kynurenine	cytoplasm
KYN[m]	L-kynurenine	mitochondria
LAC[c]	(R)-lactate	cytoplasm
LAC[e]	(R)-lactate	extracellular
LAC[m]	(R)-lactate	mitochondria
LACAL[c]	(R)-lactaldehyde	cytoplasm
LACAL[m]	(R)-lactaldehyde	mitochondria
LACT[b]	lactose	plasma membrane
LACT[c]	lactose	cytoplasm
LAlaTRNA[c]	L-alanyl-tRNA(Ala)	cytoplasm
LARAB[e]	L-arabinose	extracellular
LARABP[e]	beta-L-arabinose 1-phosphate	extracellular
LCP[b]	beta-L-arabinose 1-phosphate	extracellular
LCysTRNA[c]	L-cysteinyl-tRNA(Cys)	cytoplasm
LEU[c]	L-leucine	cytoplasm
LEU[m]	L-leucine	mitochondria
LEUKA[c]	leukotriene A4	cytoplasm
LEUKB[c]	leukotriene B4	cytoplasm
LGLNTRNA[c]	L-glutaminyl-tRNA(Gln)	cytoplasm
LGLUTRNA[c]	L-glutamyl-tRNA(Glu)	cytoplasm
LGLUTRNA[m]	L-glutamyl-tRNA(Glu)	mitochondria
LGT[c]	(R)-S-lactoylglutathione	cytoplasm
LGT[e]	(R)-S-lactoylglutathione	extracellular
LILEUTRNA[c]	L-isoleucyl-tRNA(Ile)	cytoplasm
LILEUTRNA[m]	L-isoleucyl-tRNA(Ile)	mitochondria
LIPACP[c]	Lipoyl-ACP	cytoplasm
LIPAMP[c]	lipoyl-AMP	cytoplasm
LIPIC[c]	lipoic acid	cytoplasm
Lipid[c]	lipoic acid	cytoplasm
Lipid[e]	lipoic acid	cytoplasm
LIPO[c]	lipoamide	cytoplasm
LIPO[m]	lipoamide	mitochondria
LLAC[c]	(S)-lactate	cytoplasm
LLCT[c]	L-cystathionine	cytoplasm
LLCT[m]	L-cystathionine	mitochondria
LLeuTRNA[c]	L-leucyl-tRNA(Leu)	cytoplasm
LLeuTRNA[m]	L-leucyl-tRNA(Leu)	mitochondria
LLTRNA[c]	L-lysyl-tRNA(Lys)	cytoplasm
LMETTRNA[c]	L-methionyl-tRNA(Met)	cytoplasm
LMETTRNA[e]	L-methionyl-tRNA(Met)	cytoplasm
LMETTRNA[m]	L-methionyl-tRNA(Met)	mitochondria
LNST[c]	lanosterol	cytoplasm
LPA[c]	lysophosphatidate	cytoplasm
LPC[b]	lysophosphatidylcholine	plasma membrane
LPC[c]	lysophosphatidylcholine	cytoplasm
LPC[e]	lysophosphatidylcholine	extracellular
LPE[b]	Lysophosphatidylethanolamine	plasma membrane
LPE[c]	Lysophosphatidylethanolamine	cytoplasm
LPheTRNA[c]	L-phenylalanyl-tRNA(Phe)	cytoplasm
LPROTRNA[c]	L-prolyl-tRNA(Pro)	cytoplasm
LPROTRNA[m]	L-prolyl-tRNA(Pro)	mitochondria
LSERTRNA[c]	L-seryl-tRNA(Ser)	cytoplasm
LSERTRNA[m]	L-seryl-tRNA(Ser)	mitochondria
LTHETRNA[c]	L-threonyl-tRNA(Thr)	cytoplasm
LTyrTRNA[c]	L-tyrosyl-tRNA(Tyr)	cytoplasm
LTyrTRNA[m]	L-tyrosyl-tRNA(Tyr)	mitochondria
LValTRNA[c]	L-valyl-tRNA(Val)	cytoplasm
LYS[c]	L-lysine	cytoplasm
LYS[m]	L-lysine	mitochondria
LYSOPAF[b]	1-alkyl-sn-glycero-3-phosphocholine	plasma membrane
MACAC[c]	4-maleylacetoacetate	cytoplasm
MAGLY[b]	4-maleylacetoacetate	cytoplasm
MAGLY[c]	1-monoglycerides	cytoplasm
MAL[c]	(S)-malate	cytoplasm
MAL[m]	(S)-malate	mitochondria
MAL[p]	(S)-malate	mitochondria
MAL[x]	(S)-malate	peroxisome
MALACP[c]	malonyl-[acp]	cytoplasm
MALACP[m]	malonyl-[acp]	mitochondria
MALACP_MES[c]	malonyl-[acyl-carrier protein] methyl ester	cytoplasm
MALCOA[c]	malonyl-CoA	cytoplasm
MALCOA[m]	malonyl-CoA	mitochondria
MAN[b]	D-mannose	plasma membrane
MAN[c]	D-mannose	cytoplasm
MAN1P[c]	D-mannose 1-phosphate	cytoplasm
MAN1P[m]	D-mannose 1-phosphate	mitochondria
MAN6P[b]	D-mannose 6-phosphate	plasma membrane
MAN6P[c]	D-mannose 6-phosphate	cytoplasm
MAN6P[m]	D-mannose 6-phosphate	mitochondria
MANCHIBDPD[c]	beta-(1->4)-D-mannosylchitobiosyldiphosphodolichol	cytoplasm
MANDPP[c]	D-Man-alpha-(1->3)-D-Man-beta-(1->4)-D-GlcNAc-beta-(1->4)-D-GlcNAc-diphosphodolichol	cytoplasm
MANDPPD[b]	D-Man-alpha-(1->3)-[D-Man-alpha-(1->6)]-D-Man-beta-(1->4)-D-GlcNAc-beta-(1->4)-D-GlcNAc-diphosphodolichol	plasma membrane
MANDPPD[c]	D-Man-alpha-(1->3)-[D-Man-alpha-(1->6)]-D-Man-beta-(1->4)-D-GlcNAc-beta-(1->4)-D-GlcNAc-diphosphodolichol	cytoplasm
MANNACD[b]	D-Man-alpha-(1->2)-D-Man-alpha-(1->2)-D-Man-alpha-(1->3)-[D-Man-alpha-(1->6)]-D-Man-beta-(1->4)-D-GlcNAc-beta-(1->4)-D-GlcNAc-diphosphodolichol	plasma membrane
MANNACDD[b]	D-Man-alpha-(1->2)-D-Man-alpha-(1->2)-D-Man-alpha-(1->3)-[D-Man-alpha-(1->6)]-D-Man-beta-(1->4)-D-GlcNAc-beta-(1->4)-D-GlcNAc-diphosphodolichol	plasma membrane
MANNACDDD[b]	D-Man-alpha-(1->2)-D-Man-alpha-(1->2)-D-Man-alpha-(1->3)-[D-Man-alpha-(1->6)]-D-Man-beta-(1->4)-D-GlcNAc-beta-(1->4)-D-GlcNAc-diphosphodolichol	plasma membrane
MANNAN[b]	D-Man-alpha-(1->2)-D-Man-alpha-(1->2)-D-Man-alpha-(1->3)-[D-Man-alpha-(1->6)]-D-Man-beta-(1->4)-D-GlcNAc-beta-(1->4)-D-GlcNAc-diphosphodolichol	plasma membrane
MANNAN[c]	mannan	cytoplasm
MASCORBATE[c]	monodehydroascorbate	cytoplasm
MASCORBATE[e]	monodehydroascorbate	extracellular
MASCORBATE[m]	monodehydroascorbate	mitochondria
MAYLPYR[c]	maleylpyruvate	cytoplasm
MCCANOL[b]	24-Methylene-cycloartenol	plasma membrane
MCCANOL[c]	24-Methylene-cycloartenol	cytoplasm
MCECOA[b]	2-methylacetoacetyl-CoA	plasma membrane
MCECOA[c]	2-methylacetoacetyl-CoA	cytoplasm
MCECOA[m]	2-methylacetoacetyl-CoA	mitochondria
MCECOA[p]	2-methylacetoacetyl-CoA	mitochondria
MCRCOA[c]	3-methylbut-2-enoyl-CoA	cytoplasm
MCRCOA[m]	3-methylbut-2-enoyl-CoA	mitochondria
MCRLCOA[c]	Methacrylyl CoA	cytoplasm
MCRLCOA[m]	Methacrylyl CoA	mitochondria
MEBUELCOA[c]	trans2-methyl-but-2-enoyl coA	cytoplasm
MEBUELCOA[m]	trans2-methyl-but-2-enoyl coA	mitochondria
MECPYR[c]	mercaptopyruvate	cytoplasm
MECPYR[m]	mercaptopyruvate	mitochondria
MELI[c]	melibiose	cytoplasm
MET[c]	L-methionine	cytoplasm
MET[e]	L-methionine	cytoplasm
MET[m]	L-methionine	mitochondria
METBUCOA[c]	2-methylbutanoyl-CoA	cytoplasm
METBUCOA[m]	2-methylbutanoyl-CoA	mitochondria
METBYCOA[b]	2-methyl-2-hydroxybutyryl-CoA	plasma membrane
METBYCOA[c]	2-methyl-2-hydroxybutyryl-CoA	cytoplasm
METBYCOA[m]	2-methyl-2-hydroxybutyryl-CoA	mitochondria
METHF[c]	5,10-methenyltetrahydrofolate	cytoplasm
METHF[m]	5,10-methenyltetrahydrofolate	mitochondria
METHIR1P[c]	S-methyl-5-thio-D-ribulose 1-phosphate	cytoplasm
METHIR1P[m]	S-methyl-5-thio-D-ribulose 1-phosphate	mitochondria
METHOL[c]	methanol	cytoplasm
METHOL[e]	methanol	extracellular
METHOL[m]	methanol	mitochondria
METHPENP[c]	5-(methylthio)-2,3-dioxopentyl phosphate	cytoplasm
METHPENP[m]	5-(methylthio)-2,3-dioxopentyl phosphate	mitochondria
METNIC[c]	1-methylnicotinamide	cytoplasm
METTHF[c]	5,10-methylenetetrahydrofolate	cytoplasm
METTHF[m]	5,10-methylenetetrahydrofolate	mitochondria
MFEST[b]	Methylfecosterol	plasma membrane
MGCOA[c]	trans-3-methylglutaconyl-CoA	cytoplasm
MGCOA[m]	trans-3-methylglutaconyl-CoA	mitochondria
MI1P[c]	1D-myo-inositol 3-phosphate	cytoplasm
MICIT[p]	1D-myo-inositol 3-phosphate	cytoplasm
MLEPL[b]	4,4-dimethyl-5alpha-cholest-7-en-3beta-ol	plasma membrane
MLEPNOL[b]	24-Methylene-lophenol	plasma membrane
MLT[c]	maltose	cytoplasm
MLT[e]	maltose	extracellular
MLTIOSE[c]	maltotriose	cytoplasm
MLTIOSE[e]	maltotriose	extracellular
MLTOSE[c]	maltotetraose	cytoplasm
MMCOA[m]	(S)-methylmalonyl-CoA	mitochondria
MMCOA[p]	(S)-methylmalonyl-CoA	mitochondria
MMSHY[c]	Methylmalonate semialdehyde	cytoplasm
MMSHY[m]	Methylmalonate semialdehyde	mitochondria
MODA[b]	Methylmalonate semialdehyde	mitochondria
MODA[c]	Methylmalonate semialdehyde	mitochondria
MODECO[b]	Methylmalonate semialdehyde	mitochondria
MODECO[c]	Methylmalonate semialdehyde	mitochondria
MODO[b]	Methylmalonate semialdehyde	mitochondria
MODO[c]	Methylmalonate semialdehyde	mitochondria
MPYR[c]	Methylmalonate semialdehyde	mitochondria
MTHF[c]	5-methyltetrahydrofolate	cytoplasm
MTHGXL[c]	methylglyoxal	cytoplasm
MTHIOBUT[c]	4-(methylthio)-2-oxobutanoate	cytoplasm
MTHPTGLU[c]	5-methyltetrahydropteroyltri-L-glutamate	cytoplasm
MVL[c]	(R)-mevalonate	cytoplasm
MYOBISPI[b]	1D-myo-inositol 1,4-bisphosphate	plasma membrane
MYOI[b]	myo-inositol	plasma membrane
MYOI[c]	myo-inositol	cytoplasm
MYOI[e]	myo-inositol	extracellular
MYOI[p]	myo-inositol	extracellular
N4HBZ[b]	4-hydroxy-3-octaprenylbenzoate	plasma membrane
N4HBZ[c]	4-hydroxy-3-octaprenylbenzoate	cytoplasm
NAD[b]	NAD(+)	plasma membrane
NAD[c]	NAD(+)	cytoplasm
NAD[c]	NAD(+)	cytoplasm
NAD[e]	NAD(+)	extracellular
NAD[m]	NAD(+)	mitochondria
NAD[p]	NAD(+)	mitochondria
NADH[b]	NADH	plasma membrane
NADH[c]	NADH	cytoplasm
NADH[c]	NADH	cytoplasm
NADH[e]	NADH	extracellular
NADH[m]	NADH	mitochondria
NADH[m]	NADH	mitochondria
NADH[p]	NADH	mitochondria
NADP[b]	NADP(+)	plasma membrane
NADP[c]	NADP(+)	cytoplasm
NADP[e]	NADP(+)	cytoplasm
NADP[m]	NADP(+)	mitochondria
NADP[p]	NADP(+)	mitochondria
NADPH[b]	NADPH	plasma membrane
NADPH[c]	NADPH	cytoplasm
NADPH[e]	NADPH	extracellular
NADPH[m]	NADPH	mitochondria
NADPH[p]	NADPH	mitochondria
NAG[b]	N-acetyl-D-glucosamine	plasma membrane
NAG[c]	N-acetyl-D-glucosamine	cytoplasm
NAG[e]	N-acetyl-D-glucosamine	extracellular
NAGA1P[c]	N-acetyl-D-glucosamine 1-phosphate	cytoplasm
NAGA6P[c]	N-acetyl-D-glucosamine 6-phosphate	cytoplasm
NAGDPD[b]	N-acetyl-D-glucosaminyl-diphosphodolichol	plasma membrane
NAGDPD[c]	N-acetyl-D-glucosaminyl-diphosphodolichol	cytoplasm
NAGLU[c]	N-acetyl-L-glutamate	cytoplasm
NAGLU[m]	N-acetyl-L-glutamate	mitochondria
NAGLUP[m]	N-acetyl-L-gamma-glutamyl phosphate	mitochondria
NAGLUS[c]	N-acetyl-L-glutamate 5-semialdehyde	cytoplasm
NAGLUS[m]	N-acetyl-L-glutamate 5-semialdehyde	mitochondria
NAGPMIL[b]	6-(N-acetyl-alpha-D-glucosaminyl)-1-phosphatidyl-1D-myo-inositol	plasma membrane
NAORN[c]	N2-acetyl-L-ornithine	cytoplasm
NAORN[m]	N2-acetyl-L-ornithine	mitochondria
NH3[c]	NH3	cytoplasm
NH3[c]	NH3	cytoplasm
NH3[e]	NH3	extracellular
NH3[m]	NH3	mitochondria
NH4[e]	Ammonium	extracellular
NH4OH[c]	ammonium hydroxide	cytoplasm
NICD[c]	nicotinamide	cytoplasm
NICNATE[c]	nicotinate	cytoplasm
NICNUCLE[c]	nicotinate D-ribonucleotide	cytoplasm
NIDRINE[c]	nicotinamide ribonucleotide	cytoplasm
NITE[c]	nitrile	cytoplasm
NITOXE[p]	nitrile	cytoplasm
NITROPRO[m]	2-nitropropane	mitochondria
NMN[c]	nicotinamide mononucleotide	cytoplasm
NPP[b]	octaprenyl diphosphate	plasma membrane
NPRAN[c]	N-(5-phospho-D-ribosyl)anthranilate	cytoplasm
NSERNIN[c]	N-acetyl-Serotonin	cytoplasm
O2[b]	oxygen	plasma membrane
O2[c]	oxygen	cytoplasm
O2[c]	oxygen	cytoplasm
O2[e]	oxygen	extracellular
O2[m]	oxygen	mitochondria
O2[p]	oxygen	mitochondria
O2[x]	oxygen	peroxisome
OA[c]	oxaloacetate	cytoplasm
OA[c]	oxaloacetate	cytoplasm
OA[e]	oxaloacetate	extracellular
OA[m]	oxaloacetate	mitochondria
OA[p]	oxaloacetate	mitochondria
OA[x]	oxaloacetate	peroxisome
OAHSER[c]	O-acetyl-L-homoserine	cytoplasm
OBSFUL[c]	obtusifoliol	cytoplasm
OBUT[c]	2-oxobutanoate	cytoplasm
OBUT[m]	2-oxobutanoate	mitochondria
OFERN[c]	oxidized [2Fe-2S] ferredoxin	cytoplasm
OICAP[c]	(2S)-2-isopropyl-3-oxosuccinate	cytoplasm
OICAP[m]	(2S)-2-isopropyl-3-oxosuccinate	mitochondria
OIVAL[c]	(R)-3-methyl-2-oxobutanoate	cytoplasm
OIVAL[m]	(R)-3-methyl-2-oxobutanoate	mitochondria
OMP[c]	orotidine 5'-phosphate	cytoplasm
OMVAL[c]	2-keto-3-methyl-valerate	cytoplasm
OMVAL[m]	2-keto-3-methyl-valerate	mitochondria
ORN[c]	L-ornithine	cytoplasm
ORN[m]	L-ornithine	mitochondria
OROA[c]	orotate	cytoplasm
OROA[m]	orotate	mitochondria
OTHIO[c]	thioredoxin disulfide	cytoplasm
OXOGLU[c]	2-oxoglutaramate	cytoplasm
OXPPNE[m]	2-oxosuccinamate	cytoplasm
P5C[c]	(S)-1-pyrroline-5-carboxylate	cytoplasm
P5C[m]	(S)-1-pyrroline-5-carboxylate	mitochondria
PA[b]	phosphatidate	plasma membrane
PA[c]	phosphatidate	cytoplasm
PA[m]	phosphatidate	mitochondria
PABA[c]	4-aminobenzoate	cytoplasm
PAF[b]	2-acetyl-1-alkyl-sn-glycero-3-phosphocholine	plasma membrane
PANT[c]	(R)-pantoate	cytoplasm
PANT[m]	(R)-pantoate	mitochondria
PAP[c]	adenosine 3',5'-bisphosphate	cytoplasm
PAP[e]	adenosine 3',5'-bisphosphate	cytoplasm
PAPS[c]	3'-phospho-5'-adenylyl sulfate	cytoplasm
PAYL[c]	3'-phospho-adenylate	cytoplasm
PC[b]	phosphatidylcholines	plasma membrane
PC[c]	phosphatidylcholines	cytoplasm
PC[m]	phosphatidylcholines	mitochondria
PCACE[c]	3,4-dihydroxybenzoate	cytoplasm
PCHO[c]	choline phosphate	cytoplasm
PCHO[e]	choline phosphate	extracellular
PDME[b]	phosphatidyl-N-dimethylethanolamine	plasma membrane
PDXAL[c]	pyridoxal	cytoplasm
PDXAM[c]	pyridoxamine	cytoplasm
PDXAM5PI[c]	pyridoxamine 5'-phosphate	cytoplasm
PDXI[c]	pyridoxine	cytoplasm
PDXIPI[c]	pyridoxine-phosphate	cytoplasm
PDXL5PI[c]	pyridoxal 5'-phosphate	cytoplasm
PE[b]	phosphatidylethanolamines	plasma membrane
PE[c]	phosphatidylethanolamines	cytoplasm
PEP[b]	phosphatidylethanolamines	extracellular
PEP[c]	phosphoenolpyruvate	cytoplasm
PEP[m]	phosphoenolpyruvate	mitochondria
PETHM[c]	ethanolamine phosphate	cytoplasm
PETHM[m]	ethanolamine phosphate	mitochondria
PG[b]	phosphatidylglycerol	plasma membrane
PG[c]	phosphatidylglycerol	cytoplasm
PHE[c]	L-phenylalanine	cytoplasm
PHE[m]	L-phenylalanine	mitochondria
PHEME[b]	protoheme	plasma membrane
PHEME[c]	protoheme	cytoplasm
PHEME[m]	protoheme	mitochondria
PHEN[c]	prephenate	cytoplasm
PHOPTRIN[c]	phosphinothricin	cytoplasm
PHOSLP[c]	phosphinothricin	cytoplasm
PHOSLP[m]	phosphinothricin	cytoplasm
PHP[c]	3-phosphonooxypyruvate	cytoplasm
PHP[m]	3-phosphonooxypyruvate	mitochondria
PHPYR[c]	keto-phenylpyruvate	cytoplasm
PHPYR[m]	keto-phenylpyruvate	mitochondria
PHSER[c]	O-phospho-L-homoserine	cytoplasm
PHSP[b]	phytosphingosine 1-phosphate	plasma membrane
PHSP[c]	phytosphingosine 1-phosphate	cytoplasm
PHSP[m]	phytosphingosine 1-phosphate	mitochondria
PI[b]	phosphate	plasma membrane
PI[c]	phosphate	cytoplasm
PI[e]	phosphate	extracellular
PI[m]	phosphate	mitochondria
PI[p]	phosphate	mitochondria
PINS[b]	1-phosphatidyl-1D-myo-inositols	plasma membrane
PINS[c]	1-phosphatidyl-1D-myo-inositols	cytoplasm
PINS[p]	1-phosphatidyl-1D-myo-inositols	extracellular
PINS4P[b]	1-phosphatidyl-1D-myo-inositol 4-phosphates	plasma membrane
PINS4P[c]	1-phosphatidyl-1D-myo-inositol 4-phosphates	cytoplasm
PINS4P[m]	1-phosphatidyl-1D-myo-inositol 4-phosphates	mitochondria
PINSP[c]	1-phosphatidyl-1D-myo-inositol 3-phosphates	cytoplasm
PLPNDPI[b]	1-phosphatidyl-1D-myo-inositol 3-phosphates	cytoplasm
PMFA[b]	phospholipid methylene fatty acid	plasma membrane
PMME[b]	phosphatidyl-N-methylethanolamines	plasma membrane
PMVL[c]	(R)-5-phosphomevalonate	cytoplasm
PNTO[c]	(R)-pantothenate	cytoplasm
PNTO[m]	(R)-pantothenate	mitochondria
POFA[b]	phospholipid olefinic fatty acid	plasma membrane
PPBG[c]	porphobilinogen	cytoplasm
PPBG[m]	porphobilinogen	mitochondria
PPGIX[c]	Protoporphyrinogen-IX	cytoplasm
PPGIX[m]	Protoporphyrinogen-IX	mitochondria
PPI[b]	diphosphate	plasma membrane
PPI[c]	diphosphate	cytoplasm
PPI[m]	diphosphate	mitochondria
PPI[p]	diphosphate	mitochondria
PPMAL[c]	2-isopropylmaleate	cytoplasm
PPMVL[c]	(R)-5-diphosphomevalonate	cytoplasm
PPRIX[c]	protoporphyrin	cytoplasm
PPRIX[m]	protoporphyrin	mitochondria
PQ[c]	Pyrroloquinoline quinone	cytoplasm
PQ[e]	Pyrroloquinoline quinone	extracellular
PQH2[c]	Pyrroloquinoline quinol	cytoplasm
PQH2[e]	Pyrroloquinoline quinol	extracellular
PRAM[c]	5-phospho-D-ribosylamine	cytoplasm
PRBAMP[c]	phosphoribosyl-AMP	cytoplasm
PRBATP[c]	1-(5-phospho-D-ribosyl)-ATP	cytoplasm
PRECOR[c]	precorrins	cytoplasm
PRECOR[e]	precorrins	extracellular
PRFICA[c]	5-formamido-1-(5-phospho-D-ribosyl)imidazole-4-carboxamide	cytoplasm
PRFP[c]	1-(5-phospho-D-ribosyl)-5-[(5-phospho-D-ribosylamino)methylideneamino]imidazole-4-carboxamide	cytoplasm
PRLP[c]	-5[(5-phospho-1-deoxy-D-ribulos-1-ylamino)methylideneamino]-1-(5-phospho-D-ribosyl)imidazole-4-carboxamide	cytoplasm
PRO[c]	L-proline	cytoplasm
PRO[m]	L-proline	mitochondria
PROP[c]	propionate	cytoplasm
PROP[m]	propionate	mitochondria
PROPCOA[c]	propionyl-CoA	cytoplasm
PROPCOA[m]	propionyl-CoA	mitochondria
PROPCOA[p]	propionyl-CoA	mitochondria
PROPCOA[x]	propionyl-CoA	peroxisome
PROTASN[b]	0	plasma membrane
PROTEIN[c]	Protein	cytoplasm
Protein[c]	Protein	cytoplasm
PROTEIN_C80L[c]	protein N6-(octanoyl)lysine	cytoplasm
PROTEIN_C80L[c][c]	protein N6-(octanoyl)lysine	cytoplasm
PROTEIN_LIPL[c]	protein N6-(lipoyl)lysine	cytoplasm
PROTEIN_LIPL[c][c]	protein N6-(lipoyl)lysine	cytoplasm
PRPP[c]	5-phospho-alpha-D-ribose 1-diphosphate	cytoplasm
PS[b]	phosphatidylserine	plasma membrane
PS[c]	phosphatidylserine	cytoplasm
PS[p]	phosphatidylserine	extracellular
PSPH[b]	phytosphingosine	plasma membrane
PSPH[c]	phytosphingosine	cytoplasm
PSPH[e]	phytosphingosine	extracellular
PSPH[m]	phytosphingosine	mitochondria
PTATE[e]	pectate	extracellular
PTE[b]	pectate	extracellular
PTEPPI[b]	pectate	extracellular
PTRSC[c]	putrescine	cytoplasm
PURI5P[c]	pseudouridine 5'-phosphate	cytoplasm
PYR[b]	pseudouridine 5'-phosphate	cytoplasm
PYR[c]	pyruvate	cytoplasm
PYR[m]	pyruvate	mitochondria
PYR[p]	pyruvate	mitochondria
PYR[x]	pyruvate	peroxisome
PYVYLTRIN[c]	6-pyruvoyl-5,6,7,8-tetrahydropterin	cytoplasm
PYVYLTRIN[m]	6-pyruvoyl-5,6,7,8-tetrahydropterin	mitochondria
Q[b]	6-pyruvoyl-5,6,7,8-tetrahydropterin	mitochondria
Q[c]	ubiquinone	cytoplasm
Q[m]	ubiquinone	mitochondria
QA[c]	quinolinate	cytoplasm
QH2[b]	quinolinate	cytoplasm
QH2[c]	ubiquinol	cytoplasm
QH2[m]	ubiquinol	mitochondria
R1P[c]	D-ribose 1-phosphate	cytoplasm
R5P[c]	D-ribose 5-phosphate	cytoplasm
RAF[e]	raffinose	extracellular
RFERN[c]	reduced [2Fe-2S] ferredoxin	cytoplasm
RGT[b]	glutathione	plasma membrane
RGT[c]	glutathione	cytoplasm
RGT[e]	glutathione	extracellular
RGT[m]	glutathione	extracellular
RGTDS[c]	glutathione disulfide	cytoplasm
RIB[c]	D-ribose	cytoplasm
RIBFLAV[c]	riboflavin	cytoplasm
RL[c]	D-ribulose	cytoplasm
RL5P[c]	D-ribulose 5-phosphate	cytoplasm
RNA[c]	RNA	cytoplasm
ROH[c]	RNA	cytoplasm
ROOH[c]	RNA	cytoplasm
RSGT[b]	RNA	cytoplasm
RSGT[c]	RNA	cytoplasm
RSGT[m]	RNA	cytoplasm
RSGT[p]	RNA	cytoplasm
RTHIO[c]	thioredoxin dithiol	cytoplasm
RTN[b]	thioredoxin dithiol	cytoplasm
RX[b]	RX	plasma membrane
RX[c]	RX	cytoplasm
S[c]	sulfur	cytoplasm
S[m]	sulfur	mitochondria
S23E[b]	(S)-2,3-epoxysqualene	plasma membrane
S23E[c]	(S)-2,3-epoxysqualene	cytoplasm
S7P[c]	sedoheptulose 7-phosphate	cytoplasm
SACP[c]	L-saccharopine	cytoplasm
SACP[m]	L-saccharopine	mitochondria
SAH[b]	S-adenosyl-L-homocysteine	plasma membrane
SAH[c]	S-adenosyl-L-homocysteine	cytoplasm
SAH[m]	S-adenosyl-L-homocysteine	mitochondria
SAICAR[c]	(2S)-2-[5-amino-1-(5-phospho-beta-D-ribosyl)imidazole-4-carboxamido]succinic acid	cytoplasm
SAM[b]	S-adenosyl-L-methionine	plasma membrane
SAM[c]	S-adenosyl-L-methionine	cytoplasm
SAM[m]	S-adenosyl-L-methionine	mitochondria
SAMOB[c]	S-adenosyl-4-methylthio-2-oxobutanoate	cytoplasm
SAP[c]	S-aminomethyldihydrolipoylprotein	cytoplasm
SAP[m]	S-aminomethyldihydrolipoylprotein	mitochondria
SARC[c]	sarcosine	cytoplasm
SCARR[c]	sulfur carrier	cytoplasm
SER[b]	L-serine	plasma membrane
SER[c]	L-serine	cytoplasm
SER[m]	L-serine	mitochondria
SERNIN[c]	Serotonin	cytoplasm
SHCR[e]	sirohydrochlorin	extracellular
SHSP[b]	sphingosine 1-phosphate	plasma membrane
SHSP[c]	sphingosine 1-phosphate	cytoplasm
SHSP[m]	sphingosine 1-phosphate	mitochondria
SIHM[e]	siroheme	extracellular
SLF[c]	sulfate	cytoplasm
SLF[e]	sulfate	extracellular
SLF[m]	sulfate	mitochondria
SME[b]	sulfate	mitochondria
SME[c]	shikimate	cytoplasm
SME[m]	shikimate	mitochondria
SME3P[b]	shikimate	mitochondria
SME3P[c]	shikimate 3-phosphate	cytoplasm
SMMNYLCOA[m]	(S)-methylmalonyl-CoA	mitochondria
SMMNYLCOA[p]	(S)-methylmalonyl-CoA	mitochondria
SOT[c]	D-sorbitol	cytoplasm
SOT[m]	D-sorbitol	mitochondria
SPGS[b]	D-sorbitol	mitochondria
SPH[b]	sphinganine	plasma membrane
SPH[c]	sphinganine	cytoplasm
SPH[e]	sphinganine	extracellular
SPH[m]	sphinganine	mitochondria
SPMYLIN[c]	ceramide phosphocholines	cytoplasm
SPMYLIN[e]	ceramide phosphocholines	extracellular
SPRM[c]	spermine	cytoplasm
SPRMD[c]	spermidine	cytoplasm
SPSE[b]	Sphingosine	plasma membrane
SPSE[c]	Sphingosine	cytoplasm
SPSE[e]	Sphingosine	extracellular
SPSE[m]	Sphingosine	mitochondria
SQL[b]	squalene	plasma membrane
SQL[c]	squalene	cytoplasm
SSC[c]	sulfur-(sulfur carrier)	cytoplasm
STAOSE[c]	stachyose	cytoplasm
STAOSE[e]	stachyose	extracellular
STAR[b]	starch	plasma membrane
STAR[c]	starch	cytoplasm
STAR[e]	starch	extracellular
SUC[c]	sucrose	cytoplasm
SUC[e]	sucrose	extracellular
SUC[p]	sucrose	extracellular
SUCC[b]	sucrose	extracellular
SUCC[c]	succinate	cytoplasm
SUCC[m]	succinate	mitochondria
SUCC[p]	succinate	mitochondria
SUCC[x]	succinate	peroxisome
SUCCOA[c]	succinyl-CoA	cytoplasm
SUCCOA[m]	succinyl-CoA	mitochondria
SUCCSAL[c]	succinate semialdehyde	cytoplasm
SUCCSAL[m]	succinate semialdehyde	mitochondria
SUCCSAL[p]	succinate semialdehyde	mitochondria
SUFT[e]	succinate semialdehyde	peroxisome
T3P1[c]	D-glyceraldehyde 3-phosphate	cytoplasm
T3P2[c]	glycerone phosphate	cytoplasm
T3P2[m]	glycerone phosphate	mitochondria
TAGLY[b]	glycerone phosphate	mitochondria
TAGLY[c]	triglycerides	cytoplasm
TAGLY[e]	triglycerides	extracellular
TAUR[c]	taurine	cytoplasm
TAUR[m]	taurine	mitochondria
THBOPRIN[c]	tetrahydrobiopterin	cytoplasm
THDP[c]	thiamin diphosphate	cytoplasm
THF[c]	tetrahydrofolate	cytoplasm
THF[m]	tetrahydrofolate	mitochondria
THFG[c]	tetrahydrofolyl-(Glu)n	cytoplasm
THFG[m]	tetrahydrofolyl-(Glu)n	mitochondria
THME[c]	thiamin	cytoplasm
THMP[c]	thiamin monophosphate	cytoplasm
THPTGLU[c]	tetrahydropteroyltri-L-glutamate	cytoplasm
THR[c]	L-threonine	cytoplasm
THR[m]	L-threonine	mitochondria
THZ[c]	5-(2-hydroxyethyl)-4-methylthiazole	cytoplasm
THZP[c]	4-methyl-5-(2-phosphonooxyethyl)thiazole	cytoplasm
TMAMMOBNAL[c]	4-Trimethylammoniobutanal	cytoplasm
TMAMMOBNAL[m]	4-Trimethylammoniobutanal	mitochondria
TMAMMOBNATE[c]	4-Trimethylammoniobutanoate	cytoplasm
TMAMMOBNATE[m]	4-Trimethylammoniobutanoate	mitochondria
TMLS[c]	N6,N6,N6-trimethyl-L-lysine	cytoplasm
TMLS[m]	N6,N6,N6-trimethyl-L-lysine	mitochondria
TPI[b]	1D-myo-inositol 1,4,5-trisphosphate	plasma membrane
TRE[c]	alpha,alpha-trehalose	cytoplasm
TRE[e]	alpha,alpha-trehalose	extracellular
TRE6P[c]	alpha,alpha'-trehalose 6-phosphate	cytoplasm
TRNA[c]	transfer RNA	cytoplasm
TRNA[e]	transfer RNA	cytoplasm
TRNA[m]	transfer RNA	mitochondria
TRP[c]	L-tryptophan	cytoplasm
TRP[m]	L-tryptophan	mitochondria
TRPTRNA[c]	L-tryptophanyl-tRNA(Trp)	cytoplasm
TRPTRNA[m]	L-tryptophanyl-tRNA(Trp)	mitochondria
TTHBOTR[c]	tetrahydrobiopterin	cytoplasm
TYR[c]	L-tyrosine	cytoplasm
TYR[m]	L-tyrosine	mitochondria
UDP[b]	UDP	plasma membrane
UDP[c]	UDP	cytoplasm
UDP[e]	UDP	extracellular
UDP[m]	UDP	mitochondria
UDP[p]	UDP	mitochondria
UDPG[b]	UDP-glucose	plasma membrane
UDPG[c]	UDP-glucose	cytoplasm
UDPG[m]	UDP-glucose	mitochondria
UDPGAL[c]	UDP-D-galactose	cytoplasm
UDPGAL[m]	UDP-D-galactose	mitochondria
UDPGE[b]	UDP-D-glucuronate	plasma membrane
UDPGE[c]	UDP-D-glucuronate	cytoplasm
UDPGE[m]	UDP-D-glucuronate	mitochondria
UDPGE[p]	UDP-D-glucuronate	mitochondria
UDPNAG[b]	UDP-N-acetyl-D-glucosamine	plasma membrane
UDPNAG[c]	UDP-N-acetyl-D-glucosamine	cytoplasm
UDPNAG[e]	UDP-N-acetyl-D-glucosamine	extracellular
UDPNAG[m]	UDP-N-acetyl-D-glucosamine	extracellular
UDPXYL[c]	UDP-D-xylose	cytoplasm
UDPXYL[m]	UDP-D-xylose	mitochondria
UGC[c]	(-)-ureidoglycolate	cytoplasm
UGC[e]	(-)-ureidoglycolate	cytoplasm
UGC[x]	(-)-ureidoglycolate	peroxisome
UMP[b]	UMP	plasma membrane
UMP[c]	UMP	cytoplasm
UMP[m]	UMP	mitochondria
UPGIII[c]	uroporphyrinogen III	cytoplasm
UPGIII[m]	uroporphyrinogen III	mitochondria
URA[c]	uracil	cytoplasm
URA[m]	uracil	mitochondria
URATE[p]	uracil	mitochondria
UREA[c]	urea	cytoplasm
UREA[e]	urea	extracellular
UREA[x]	urea	peroxisome
URI[b]	uridine	plasma membrane
URI[c]	uridine	cytoplasm
URI[e]	uridine	extracellular
URI[m]	uridine	mitochondria
UTP[c]	UTP	cytoplasm
UTP[m]	UTP	mitochondria
VAL[c]	L-valine	cytoplasm
VAL[m]	L-valine	mitochondria
XAN[c]	xanthine	cytoplasm
XAN[e]	xanthine	extracellular
XAN[x]	xanthine	peroxisome
XMP[c]	xanthosine 5'-phosphate	cytoplasm
XMP[m]	xanthosine 5'-phosphate	mitochondria
XOL[c]	xylitol	cytoplasm
XTP[c]	XTP	cytoplasm
XTSINE[c]	xanthosine	cytoplasm
XUL[c]	D-xylulose	cytoplasm
XUL5P[c]	D-xylulose 5-phosphate	cytoplasm
XYL[c]	D-xylose	cytoplasm
XYLACNE[m]	L-xylo-hex-2-ulono-1,4-lactone	mitochondria
XYLLAC[c]	D-xylono-1,5-lactone	cytoplasm
ZYMST[c]	zymosterol	cytoplasm

## Sheet: Improved annotated genes
Supplementary File 1: Detailed GPR information of model iNI1159
Table S1.3: List of improved annotated genes in the iNI1159 model
WJ11 gene	Comments
evm.model.scaffold00001.107	Added gene
evm.model.scaffold00123.12	Added gene
evm.model.scaffold00015.38	Added gene
evm.model.scaffold00037.8	Added gene
evm.model.scaffold00043.20	Added gene
evm.model.scaffold00222.1	Added gene
evm.model.scaffold00022.45	Added gene
evm.model.scaffold00168.13	Added gene
evm.model.scaffold00131.6	Added gene
evm.model.scaffold00099.9	Added gene
evm.model.scaffold00085.4	Added gene
evm.model.scaffold00050.29	Added gene
evm.model.scaffold00085.15	Added gene
evm.model.scaffold00001.1	Added gene
evm.model.scaffold00048.15	Added gene
evm.model.scaffold00033.21	Added gene
evm.model.scaffold00269.1	Added gene
evm.model.scaffold00039.11	Added gene
evm.model.scaffold00052.15	Added gene
evm.model.scaffold00014.15	Added gene
evm.model.scaffold00088.39	Added gene
evm.model.scaffold00130.6	Added gene
evm.model.scaffold00024.22	Added gene
evm.model.scaffold00009.2	Added gene
evm.model.scaffold00028.12	Added gene
evm.model.scaffold00784.1	Added gene
evm.model.scaffold00221.19	Added gene
evm.model.scaffold00022.39	Added gene
evm.model.scaffold00060.3	Added gene
evm.model.scaffold00087.20	Added gene
evm.model.scaffold00024.23	Added gene
evm.model.scaffold00021.24	Added gene
evm.model.scaffold00012.37	Added gene
evm.model.scaffold00093.35	Added gene
evm.model.scaffold00130.23	Added gene
evm.model.scaffold00767.1	Added gene
evm.model.scaffold00006.63	Added gene
evm.model.scaffold00090.2	Updated gene annotation
evm.model.scaffold00112.11	Updated gene annotation
evm.model.scaffold00212.14	Updated gene annotation
evm.model.scaffold00037.49	Updated gene annotation
evm.model.scaffold00114.9	Updated gene annotation
evm.model.scaffold00071.40	Updated gene annotation
evm.model.scaffold00055.22	Updated gene annotation
evm.model.scaffold00017.10	Updated gene annotation
evm.model.scaffold00170.9	Updated gene annotation
evm.model.scaffold00174.26	Updated gene annotation
evm.model.scaffold00031.39	Updated gene annotation
evm.model.scaffold00041.20	Updated gene annotation
evm.model.scaffold00195.1	Updated gene annotation
evm.model.scaffold00054.53	Updated gene annotation
evm.model.scaffold00032.56	Updated gene annotation
evm.model.scaffold00121.6	Updated gene annotation

## Sheet: Added_updated EC numbers
Supplementary File 1: Detailed GPR information of model iNI1159
Table S1.4: List of added/updated EC numbers in the iNI1159 model
New EC Number	Comments
2.4.1.-	Updated EC Number
2.4.2.-	Updated EC Number
4.1.2.-	Updated EC Number
1.14.13.-	Updated EC Number
1.14.14.154	Updated EC Number
5.3.3.-	Updated EC Number
1.3.3.-	Updated EC Number
1.14.14.-	Updated EC Number
3.5.1.-	Added EC Number
3.1.3.-	Added EC Number
2.7.8.-	Added EC Number
2.5.1.-	Added EC Number
4.1.3.-	Added EC Number
4.1.1.-	Added EC Number
1.13.14.-	Added EC Number
2.1.1.-	Added EC Number
