# Supplementary material for: Metabolic traits specific for lipid-overproducing strain of Mucor circinelloides WJ11 identified by genome-scale modeling approach
Source: PeerJ. 2019 Jun 7;7:e7015. doi: 10.7717/peerj.7015 (PMC6613434; doi:10.7717/peerj.7015)
Supplement: File S2 — Table S2.1: The unique metabolic reactions of M. circinelloides (iNI1159). Table S2.2: The unique metabolic reactions of M. circinelloides (iWV1213). [file peerj-07-7015-s002.xlsx]

## Sheet: Unique reaction of iNI1159
Supplementary File 2: Unique reactions identified in M. circinelloides strain WJ11 (iNI1159) and reference strain CBS277.49 (iWV1213).
Table S2.1: The unique metabolic reactions of M. circinelloides (iNI1159)
Rxn name	Biochemical reaction	Gene-reaction association	Gene	Protein function	EC number	Subsystem	Metabolism
r28	NAD[c] + GL[c] <=> NADH[c] + GLYAL[c]	evm.model.scaffold00050.50	evm.model.scaffold00050.50	NAD-dependent alcohol dehydrogenase	1.1.1.1	Glycolysis/gluconeogenesis	Carbohydrate
r32	D6PGL[e] + H2O[e] -> D6PGC[e]	evm.model.scaffold00087.15	evm.model.scaffold00087.15	6-phosphoglucolactonase	3.1.1.31	Pentose-phosphate pathway	Carbohydrate
r43	DR1P[c] <=> DEORIPI[c]	evm.model.scaffold00217.16	evm.model.scaffold00217.16	phosphopentomutase	5.4.2.7	Pentose-phosphate pathway	Carbohydrate
r52	NAD[c] + COA[c] + AKG[c] -> NADH[c] + CO2[c] + SUCCOA[c]	evm.model.scaffold00012.58 and evm.model.scaffold00095.12 and evm.model.scaffold00093.26 and evm.model.scaffold00103.21	evm.model.scaffold00012.58 and evm.model.scaffold00095.12 and evm.model.scaffold00093.26 and evm.model.scaffold00103.21	2-oxoglutarate dehydrogenase complex	1.2.4.2: 2.3.1.61: 1.8.1.4	Tricarboxylic acid cycle	Carbohydrate
r67	ICIT[b] -> GLX[b] + SUCC[b]	evm.model.scaffold00063.15 or evm.model.scaffold00005.69	evm.model.scaffold00063.15 or evm.model.scaffold00005.69	Isocitrate lyase	4.1.3.1	Glyoxylate metabolism	Carbohydrate
r70	GLYCOLA[c] + NADP[c] <=> GLX[c] + NADPH[c]	evm.model.scaffold00145.9 or evm.model.scaffold00167.6 or evm.model.scaffold00335.3 or evm.model.scaffold00020.45 or evm.model.scaffold00021.41	evm.model.scaffold00145.9 or evm.model.scaffold00167.6 or evm.model.scaffold00335.3 or evm.model.scaffold00020.45 or evm.model.scaffold00021.41	glyoxylate reductase (NADPH)	1.1.1.26	Glyoxylate metabolism	Carbohydrate
r71	HXPYR[c] + NADPH[c] -> GLYCTE[c] + NADP[c]	evm.model.scaffold00020.45	evm.model.scaffold00020.45	glyoxylate reductase (NADPH)	1.1.1.26	Glyoxylate metabolism	Carbohydrate
r73	PYR[b] -> CO2[b] + ACAL[b]	evm.model.scaffold00145.17 or evm.model.scaffold00141.28 or evm.model.scaffold00057.5 or evm.model.scaffold00286.11	evm.model.scaffold00145.17 or evm.model.scaffold00141.28 or evm.model.scaffold00057.5 or evm.model.scaffold00286.11	Pyruvate decarboxylase	4.1.1.1	Pyruvate metabolism	Carbohydrate
r92	MAL[m] + NAD[m] -> PYR[m] + CO2 [m]+ NADH[m]	evm.model.scaffold00079.28	evm.model.scaffold00079.28	malate dehydrogenase (oxaloacetate-decarboxylating)	1.1.1.38	Pyruvate metabolism	Carbohydrate
r106	PTATE[e] -> GALUNT[e]	evm.model.scaffold00091.29	evm.model.scaffold00091.29	Polygalacturonase	3.2.1.15	Pentose and glucuronate interconversions	Carbohydrate
r107	PTATE[e] -> DGALNT[e]	evm.model.scaffold00008.26	evm.model.scaffold00008.26	Polygalacturonase	3.2.1.15	Pentose and glucuronate interconversions	Carbohydrate
r108	DGALNT[e] -> GALUNT[e]	evm.model.scaffold00225.11 or evm.model.scaffold00009.23	evm.model.scaffold00225.11 or evm.model.scaffold00009.23	galacturan 1,4-alpha-galacturonidase	3.2.1.67	Pentose and glucuronate interconversions	Carbohydrate
r122	MICIT[p] <=> PYR[p] + SUCC[p]	evm.model.scaffold00117.9 or evm.model.scaffold00193.26 or evm.model.scaffold00100.31	evm.model.scaffold00117.9 or evm.model.scaffold00193.26 or evm.model.scaffold00100.31	methylisocitrate lyase	4.1.3.1	Propanoate metabolism	Carbohydrate
r138	NADPH[c] + XYL[c] <=> NADP[c] + XOL[c]	evm.model.scaffold00010.12 or evm.model.scaffold00149.10 or evm.model.scaffold00019.25 or evm.model.scaffold00059.34 or evm.model.scaffold00083.21 or evm.model.scaffold00114.14 or evm.model.scaffold00086.31	evm.model.scaffold00010.12 or evm.model.scaffold00149.10 or evm.model.scaffold00019.25 or evm.model.scaffold00059.34 or evm.model.scaffold00083.21 or evm.model.scaffold00114.14 or evm.model.scaffold00086.31	Aldehyde reductase	1.1.1.21	Pentose sugar metabolism	Carbohydrate
r139	NADPH[c] + XYL[c] -> NADP[c] + XOL[c]	evm.model.scaffold00010.12 or evm.model.scaffold00149.10 or evm.model.scaffold00019.25 or evm.model.scaffold00059.34 or evm.model.scaffold00083.21 or evm.model.scaffold00114.14 or evm.model.scaffold00086.31	evm.model.scaffold00010.12 or evm.model.scaffold00149.10 or evm.model.scaffold00019.25 or evm.model.scaffold00059.34 or evm.model.scaffold00083.21 or evm.model.scaffold00114.14 or evm.model.scaffold00086.31	D-xylose reductase	1.1.1.307	Pentose sugar metabolism	Carbohydrate
r159	14MNAN[c] -> MAN[c]	evm.model.scaffold00301.4 or evm.model.scaffold00218.19 or evm.model.scaffold00019.58 or evm.model.scaffold00040.43	evm.model.scaffold00301.4 or evm.model.scaffold00218.19 or evm.model.scaffold00019.58 or evm.model.scaffold00040.43	mannan endo-1,4-beta-mannosidase	3.2.1.78	Hexose sugar metabolism	Carbohydrate
r172	H2O[b] + LACT[b] -> GLC[b] + GLAC[b]	evm.model.scaffold00250.12	evm.model.scaffold00250.12	Beta-galactosidase	3.2.1.23	Disaccharide metabolism	Carbohydrate
r179	CELLU[b] -> 14GLUCAN[b] + CELLOB[b]	evm.model.scaffold00054.54 or evm.model.scaffold00127.32	evm.model.scaffold00054.54 or evm.model.scaffold00127.32	Endoglucanase	3.2.1.4	Polysaccharide metabolism	Carbohydrate
r180	CELLU[e] -> 13GLUCAN[e]	evm.model.scaffold00145.1	evm.model.scaffold00145.1	Endoglucanase	3.2.1.4	Polysaccharide metabolism	Carbohydrate
r214	UDPNAG[m] -> UDP[m] + CHIT[m]	evm.model.scaffold00021.58 or evm.model.scaffold00032.58	evm.model.scaffold00021.58 or evm.model.scaffold00032.58	Chitin synthase	2.4.1.16	Polysaccharide metabolism	Carbohydrate
r221	MANNAN[c] -> MAN[c]	evm.model.scaffold00024.48	evm.model.scaffold00024.48	mannosyl-oligosaccharide 1,2-alpha-mannosidase	3.2.1.113	Polysaccharide metabolism	Carbohydrate
r222	MANNAN[b] -> MAN[b]	evm.model.scaffold00142.27	evm.model.scaffold00142.27	mannosyl-oligosaccharide 1,2-alpha-mannosidase	3.2.1.113	Polysaccharide metabolism	Carbohydrate
r261	NADH[m] + Q[m] + 4 H_PO[m] -> NAD[m] + QH2[m] + 4 H_PO[m]	evm.model.scaffold00053.26	evm.model.scaffold00053.26	NADH-ubiquinone oxidoreductase (respiratory chain), Complex	1.6.5.3	Oxidative phosphorylation	Energy
r262	NADH[c]+ Q[c] + 4 H_PO[c] -> NAD[c]+ QH2[c] + 4 H_PO[c]	evm.model.scaffold00081.24	evm.model.scaffold00081.24	NADH-ubiquinone oxidoreductase (respiratory chain), Complex	1.6.5.3	Oxidative phosphorylation	Energy
r263	NADH[m] + FAD[m] -> NAD[m] + FADH2[m]	evm.model.scaffold00068.36	evm.model.scaffold00068.36	NADH dehydrogenase	1.6.99.3	Oxidative phosphorylation	Energy
r264	NADH[c] + FAD[c] -> NAD[c] + FADH2[c]	evm.model.scaffold00350.3	evm.model.scaffold00350.3	NADH dehydrogenase	1.6.99.3	Oxidative phosphorylation	Energy
r267	ATP[b] + H2O[b] + 3.87 H_PO[b] -> ADP[b] + PI[b] + 3.87 H_PO[b]	evm.model.scaffold00050.39 or evm.model.scaffold00026.11	evm.model.scaffold00050.39 or evm.model.scaffold00026.11	H+transporting ATPase	3.6.3.6	Oxidative phosphorylation	Energy
r270	QH2[b] + 2 FERI[b] + 4 H_PO[b] -> Q[b] + 2 FERO[b] + 4 H_PO[b]	evm.model.scaffold00319.2	evm.model.scaffold00319.2	Ubiquinol-cytochrome c reductase	1.10.2.2	Oxidative phosphorylation	Energy
r271	QH2[m] + 2 FERI[m]+ 4 H_PO[m] -> Q[m] + 2 FERO[m] + 4 H_PO[m]	evm.model.scaffold00001.95 or evm.model.scaffold00017.14 or evm.model.scaffold00017.13 or evm.model.scaffold00315.5	evm.model.scaffold00001.95 or evm.model.scaffold00017.14 or evm.model.scaffold00017.13 or evm.model.scaffold00315.5	Ubiquinol-cytochrome c reductase	1.10.2.2	Oxidative phosphorylation	Energy
r273	NADPH[c] + 2 FERI[c] -> NADP[c] + 2 FERO[c]	evm.model.scaffold00017.14 or evm.model.scaffold00206.5 or evm.model.scaffold00315.5 or evm.model.scaffold00633.1	evm.model.scaffold00017.14 or evm.model.scaffold00206.5 or evm.model.scaffold00315.5 or evm.model.scaffold00633.1	NADPH-cytochrome P450 reductase	1.6.2.4	Oxidative phosphorylation	Energy
r274	NADPH[e] + 2 FERI[e] -> NADP[e] + 2 FERO[e]	evm.model.scaffold00133.29 or evm.model.scaffold00003.36 or evm.model.scaffold00093.4 or evm.model.scaffold00010.44 or evm.model.scaffold00007.78 or evm.model.scaffold00021.51	evm.model.scaffold00133.29 or evm.model.scaffold00003.36 or evm.model.scaffold00093.4 or evm.model.scaffold00010.44 or evm.model.scaffold00007.78 or evm.model.scaffold00021.51	NADPH-cytochrome P450 reductase	1.6.2.4	Oxidative phosphorylation	Energy
r279	2 FERO[b] + 0.5 O2[b] + 4 H_PO[b] -> 2 FERI[b] + H2O[b] + 4 H_PO[b]	evm.model.scaffold00186.1	evm.model.scaffold00186.1	Cytochrome c oxidase	1.9.3.1	Oxidative phosphorylation	Energy
r280	2 FERO[e] + 0.5 O2[e] + 4 H_PO[e] -> 2 FERI[e] + H2O[e] + 4 H_PO[e]	evm.model.scaffold00100.35	evm.model.scaffold00100.35	Cytochrome c oxidase	1.9.3.1	Oxidative phosphorylation	Energy
r287	PI[b] + ADP[b] + 3.87 H_PO[b] -> H2O[b] + ATP[b] + 3.87 H_PO[b]	evm.model.scaffold00009.27	evm.model.scaffold00009.27	ATP phosphohydrolase (H+-transporting)	3.6.3.14	Oxidative phosphorylation	Energy
r288	PI[m] + ADP[m] + 3.87 H_PO[m] -> H2O[m] + ATP[m] + 3.87 H_PO[m]	evm.model.scaffold00026.47 or evm.model.scaffold00276.12	evm.model.scaffold00026.47 or evm.model.scaffold00276.12	ATP phosphohydrolase (H+-transporting)	3.6.3.14	Oxidative phosphorylation	Energy
r289	ATP[m] + H2O[m] + PHOSLP[m] -> ADP[m] + PI[m] + PHOSLP[c]	evm.model.scaffold00055.47	evm.model.scaffold00055.47	phospholipid-translocating ATPase	3.6.3.1	Oxidative phosphorylation	Energy
r290	ADP[c] + PI[c] + H2O[m] + ATP[m] + H_PO[c] -> ATP[c] + H2O[c] + PI[m] + ADP[m] + H_PO[m]	evm.model.scaffold00132.30	evm.model.scaffold00132.30	Mitochondrial ADP/ATP carrier proteins		Oxidative phosphorylation	Energy
r292	ATP[m] + H2O[m] + 3.87 H_PO[m] + Ca[m] -> ADP[m] + PI[m] + 3.87 H_PO + Ca[m]	evm.model.scaffold00109.14	evm.model.scaffold00109.14	Ca2+-transporting ATPase	3.6.3.8	Oxidative phosphorylation	Energy
r293	NADH[c] + ATP[c] -> ADP[c] + NADPH[c]	evm.model.scaffold00001.109 or evm.model.scaffold00059.43	evm.model.scaffold00001.109 or evm.model.scaffold00059.43	NADH kinase	2.7.1.86	Energy metabolism	Energy
r302	ATT[e] <=> UGC[e] + UREA[e]	evm.model.scaffold00153.6	evm.model.scaffold00153.6	Allantoicase	3.5.3.4	Nitrogen metabolism	Energy
r324	OXPPNE[m] + COA[m] + NADP[m] -> ACCOA[m] + CO2[m] + NADPH[m]	evm.model.scaffold00062.13	evm.model.scaffold00062.13	malonate-semialdehyde dehydrogenase (acetylating)	1.2.1.18	beta-Alanine metabolism	Amino acids
r344	NAORN[m] + GLU[m] -> ORN[m] + NAGLU[m]	evm.model.scaffold00032.53	evm.model.scaffold00032.53	Glutamate N-acetyltransferase	2.3.1.35	Arginine and proline metabolism	Amino acids
r360	GLN[c] -> GLU[c] + NH3[c]	evm.model.scaffold00093.23	evm.model.scaffold00093.23	glutaminase	3.5.1.2	Arginine and proline metabolism	Amino acids
r418	SUCCOA[c] + GLY[c] -> COA[c] + CO2[c + AMIEVUL[c]	evm.model.scaffold00034.11	evm.model.scaffold00034.11	5-aminolevulinic acid synthase	2.3.1.37	Glycine, serine and threonine metabolism	Amino acids
r422	THR[m] <=> GLY[m]+ ACAL[m]	evm.model.scaffold00104.18	evm.model.scaffold00104.18	low-specificity L-threonine aldolase	4.1.2.48	Glycine, serine and threonine metabolism	Amino acids
r424	BETALD[c] + NAD[c] + H2O[c] -> GLYBET[c] + NADH[c]	evm.model.scaffold00017.28	evm.model.scaffold00017.28	betaine-aldehyde dehydrogenase	1.2.1.8	Glycine, serine and threonine metabolism	Amino acids
r425	THR[c] + NAD[c] -> AMOXOBU[c] + NADH[c]	evm.model.scaffold00017.28	evm.model.scaffold00017.28	L-threonine 3-dehydrogenase	1.1.1.103	Glycine, serine and threonine metabolism	Amino acids
r426	THR[m] + NAD[m] -> AMOXOBU[m] + NADH[m]	evm.model.scaffold00017.28 or evm.model.scaffold00031.51	evm.model.scaffold00017.28 or evm.model.scaffold00031.51	L-threonine 3-dehydrogenase	1.1.1.103	Glycine, serine and threonine metabolism	Amino acids
r458	CBHCAP[m] <=> IPPMAL[m]	evm.model.scaffold00090.24 or evm.model.scaffold00071.21 or evm.model.scaffold00265.8	evm.model.scaffold00090.24 or evm.model.scaffold00071.21 or evm.model.scaffold00265.8	3-isopropylmalate dehydratase	4.2.1.33	Valine, leucine and isoleucine metabolism (Branched-chain amino acids)	Amino acids
r468	H2O[c] + MGCOA[c] <=> H3MCOA[c]	evm.model.scaffold00033.47	evm.model.scaffold00033.47	Methylglutaconyl-CoA hydratase	4.2.1.18	Valine, leucine and isoleucine metabolism (Branched-chain amino acids)	Amino acids
r475	HYISOCOA[c] + H2O[c] -> HYISORATE[c] + COA[c]	evm.model.scaffold00006.59	evm.model.scaffold00006.59	3-hydroxyisobutyryl-CoA hydrolase	3.1.2.4	Valine, leucine and isoleucine metabolism (Branched-chain amino acids)	Amino acids
r476	HYISOCOA[m] + H2O[m] -> HYISORATE[m] + COA[m]	evm.model.scaffold00006.59	evm.model.scaffold00006.59	3-hydroxyisobutyryl-CoA hydrolase	3.1.2.4	Valine, leucine and isoleucine metabolism (Branched-chain amino acids)	Amino acids
r518	A6OXO[b] + NADP[b] + AMP[b] + PPI[b] -> AMA[b] + NADPH[b] + ATP[b]	evm.model.scaffold00051.19	evm.model.scaffold00051.19	L-2-aminoadipate reductase	1.2.1.95	Lysine biosynthesis	Amino acids
r519	A6OXO[c] + NADP[c] + AMP[c] + PPI[c] -> AMA[c] + NADPH[c] + ATP[c]	evm.model.scaffold00059.40	evm.model.scaffold00059.40	L-2-aminoadipate reductase	1.2.1.95	Lysine biosynthesis	Amino acids
r520	PYR[c] + ASPSA[c] -> HTET[c]+ H2O[c]	evm.model.scaffold00051.19	evm.model.scaffold00051.19	4-hydroxy-tetrahydrodipicolinate synthase	4.3.3.7	Lysine biosynthesis	Amino acids
r539	ATP[e] + MET[e] + TRNA[e] -> AMP[e] + PPI [e]+ LMETTRNA[e]	evm.model.scaffold00132.30	evm.model.scaffold00132.30	Methionyl-tRNA synthetase	6.1.1.10	Methionine metabolism	Amino acids
r542	3DDAH7P[b] -> PI[b] + DQT[b]	evm.model.scaffold00067.17	evm.model.scaffold00067.17	3-dehydroquinate synthase	4.2.3.4	Phenylalanine, tyrosine and tryptophan biosynthesis (Aromatic amino acids)	Amino acids
r544	DQT[b] -> DHSK[b]	evm.model.scaffold00030.28 or evm.model.scaffold00030.29	evm.model.scaffold00030.28 or evm.model.scaffold00030.29	3-dehydroquinate dehydratase	4.2.1.10	Phenylalanine, tyrosine and tryptophan biosynthesis	Amino acids
r546	NADPH[b] + DHSK[b] -> NADP[b] + SME[b]	evm.model.scaffold00165.15	evm.model.scaffold00165.15	Shikimate dehydrogenase	1.1.1.25	Phenylalanine, tyrosine and tryptophan biosynthesis (Aromatic amino acids)	Amino acids
r548	ATP[b] + SME[b] -> ADP[b] + SME3P[b]	evm.model.scaffold00027.3	evm.model.scaffold00027.3	Shikimate kinase	2.7.1.71	Phenylalanine, tyrosine and tryptophan biosynthesis (Aromatic amino acids)	Amino acids
r550	PEP[b] + SME3P[b] -> PI[b] + 3PSME[b]	evm.model.scaffold00001.125 or evm.model.scaffold00086.25	evm.model.scaffold00001.125 or evm.model.scaffold00086.25	3-phosphoshikimate 1-carboxyvinyltransferase	2.5.1.19	Phenylalanine, tyrosine and tryptophan biosynthesis (Aromatic amino acids)	Amino acids
r561	FKYN[e] -> FOR[e] + KYN[e]	evm.model.scaffold00064.12 or evm.model.scaffold00280.5 or evm.model.scaffold00190.6	evm.model.scaffold00064.12 or evm.model.scaffold00280.5 or evm.model.scaffold00190.6	Arylformamidase	3.5.1.9	Phenylalanine, tyrosine and tryptophan biosynthesis (Aromatic amino acids)	Amino acids
r586	AKG[m] + KYN[m] -> GLU[m] + APEBU[m]	evm.model.scaffold00073.32	evm.model.scaffold00073.32	Kynurenine aminotransferase	2.6.1.7	Phenylalanine, tyrosine and tryptophan biosynthesis (Aromatic amino acids)	Amino acids
r598	DHBZA + O2 -> MPYR	evm.model.scaffold00254.11	evm.model.scaffold00254.11	gentisate 1,2-dioxygenase	1.13.11.4	Tyrosine metabolism	Amino acids
r644	UGC[e] <=> GLX[e]+ UREA[e]	evm.model.scaffold00255.10	evm.model.scaffold00255.10	Ureidoglycolate lyase	4.3.2.3	Purine Metabolism	Nucleotide
r645	UGC[c] <=> GLX[c]+ UREA[c]	evm.model.scaffold00187.16	evm.model.scaffold00187.16	Ureidoglycolate lyase	4.3.2.3	Purine Metabolism	Nucleotide
r671	2 ATP[m] + HCO3[m] + GLN[m] -> 2 ADP[m] + PI[m] + GLU[m] + CAP[m]	evm.model.scaffold00303.5	evm.model.scaffold00303.5	Carbamoyl-phosphate synthase (glutamine-hydrolysing)	6.3.5.5	Pyrimidine metabolism	Nucleotide
r721	DUMP[c] -> DU[c] + PI[c]	evm.model.scaffold00172.12	evm.model.scaffold00172.12	5-nucleotidase	3.1.3.5	Nucleotide salvage pathway	Nucleotide
r722	DUMP[e] -> DU[e] + PI[e]	evm.model.scaffold00020.44 or evm.model.scaffold00049.19 or evm.model.scaffold00214.7	evm.model.scaffold00020.44 or evm.model.scaffold00049.19 or evm.model.scaffold00214.7	5-nucleotidase	3.1.3.5	Nucleotide salvage pathway	Nucleotide
r728	DTMP[b] + ATP[b] <=> ADP[b] + DTDP[b]	evm.model.scaffold00055.18	evm.model.scaffold00055.18	Thymidylate kinase	2.7.4.9	Nucleotide salvage pathway	Nucleotide
r780	DAGLY[b] + H2O[b] -> MAGLY[b] + 0.2938 C160[b] + 0.3994 C181[b] + 0.1544 C182[b] + 0.1295 C183[b] + 0.0229 C180[b]	evm.model.scaffold00086.9	evm.model.scaffold00086.9	Triacylglycerol lipase	3.1.1.3	Glycerolipid biosynthesis	Lipid
r784	DAGLY[b] + 0.3544 C160COA[b] + 0.3423 C181COA[b] + 0.1421 C182COA[b] + 0.1201 C183COA[b] + 0.041 C180COA[b] -> TAGLY[b] + COA[b]	evm.model.scaffold00203.19 or evm.model.scaffold00028.29	evm.model.scaffold00203.19 or evm.model.scaffold00028.29	Diacylglycerol O-acyltransferase	2.3.1.20	Glycerolipid biosynthesis	Lipid
r786	GL[c] + NADP[c] <=> GLYN[c] + NADPH[c]	evm.model.scaffold00079.32	evm.model.scaffold00079.32	Glycerol 2-dehydrogenase	1.1.1.156	Glycerolipid biosynthesis	Lipid
r797	SPH[b] + ACOA[b] -> CER2[b] + COA[b]	evm.model.scaffold00182.18 or evm.model.scaffold00046.51	evm.model.scaffold00182.18 or evm.model.scaffold00046.51	Ceramide synthase	2.3.1.24	Sphingolipid biosynthesis	Lipid
r798	SPGS[b] + ACOA[b] -> CER1[b] + COA[b]	evm.model.scaffold00005.35 or evm.model.scaffold00023.8 or evm.model.scaffold00014.38	evm.model.scaffold00005.35 or evm.model.scaffold00023.8 or evm.model.scaffold00014.38	Ceramide synthase	2.3.1.24	Sphingolipid biosynthesis	Lipid
r801	CER2[b] + 2 FERROB5[b] + O2[b] -> CER1[b] + 2 FERRIB5[b + 2 H2O[b]	evm.model.scaffold00017.8	evm.model.scaffold00017.8	Sphingolipid delta-4 desaturase	1.14.19.17	Sphingolipid biosynthesis	Lipid
r821	GASCER[e] + H2O[e] -> GLAC[e] + CER1[e]	evm.model.scaffold00021.30 or evm.model.scaffold00023.50	evm.model.scaffold00021.30 or evm.model.scaffold00023.50	Galactosylceramidase	3.2.1.46	Sphingolipid metabolism	Lipid
r822	SUFT[e] + H2O[e] -> GASCER[e] + SLF[e]	evm.model.scaffold00021.30 or evm.model.scaffold00023.50	evm.model.scaffold00021.30 or evm.model.scaffold00023.50	arylsulfatase	3.1.6.1	Sphingolipid metabolism	Lipid
r840	H2O[c] + PC[c] -> 0.057 C160[c] + 0.211 C181[c] + 0.357 C182[c] + 0.361 C183[c] + 0.014 C180[c] + GLYCEROCHO[c]	evm.model.scaffold00111.12	evm.model.scaffold00111.12	Phospholipase B1, membrane-associated	3.1.1.4; 3.1.1.5	Glycerophospholipid biosynthesis	Lipid
r919	C40[b] + COA[b]+ ATP[b] -> C40COA[b] + H2O[b] + PPI[b] + AMP[b]	evm.model.scaffold00073.35	evm.model.scaffold00073.35	Fatty-acid-CoA ligase	6.2.1.3	Fatty acid biosynthesis	Lipid
r985	C120COA[b] + CAR[b] <=> C120CAR[b] + COA[b]	evm.model.scaffold00029.41	evm.model.scaffold00029.41	Carnitine O-acetyltransferase	2.3.1.7	Carnitine shuttle	Lipid
r988	C140COA[c] + CAR[c] <=> C140CAR[c] + COA[c]	evm.model.scaffold00057.6	evm.model.scaffold00057.6	Carnitine O-acetyltransferase	2.3.1.7	Carnitine shuttle	Lipid
r1074	2 ACCOA[m] <=> COA[m] + AACCOA[m]	evm.model.scaffold00031.24	evm.model.scaffold00031.24	Acetoacetyl-CoA thiolase	2.3.1.9	Fatty acid oxidation	Lipid
r1099	ATP[b] + MODO[b] -> PPI[b] + ADMODO[b]	evm.model.scaffold00215.21	evm.model.scaffold00215.21	Molybdopterin adenylyltransferase	2.7.7.75	Folate biosynthesis	Cofactor
r1100	ATP[c] + MODO[c] -> PPI[c] + ADMODO[c]	evm.model.scaffold00073.4	evm.model.scaffold00073.4	Molybdopterin adenylyltransferase	2.7.7.75	Folate biosynthesis	Cofactor
r1101	ADMODO[b] + MODA[b] -> MODECO[b] + AMP[b]+ H2O [b]	evm.model.scaffold00073.4	evm.model.scaffold00073.4	Molybdopterin molybdotransferase	2.10.1.1	Folate biosynthesis	Cofactor
r1102	ADMODO[c] + MODA[c] -> MODECO[c] + AMP[c] + H2O[c]	evm.model.scaffold00012.69	evm.model.scaffold00012.69	Molybdopterin molybdotransferase	2.10.1.1	Folate biosynthesis	Cofactor
r1113	COA[c] + APOACP[c] -> PAP[c] + HOACP[c]	evm.model.scaffold00163.18	evm.model.scaffold00163.18	holo-[acyl-carrier-protein] synthase	2.7.8.7	Coenzyme A and pantothenate biosynthesis	Cofactor
r1114	COA[e] + + APOACP[e] -> PAP[e] + HOACP[e]	evm.model.scaffold00163.18	evm.model.scaffold00163.18	holo-[acyl-carrier-protein] synthase	2.7.8.7	Coenzyme A and pantothenate biosynthesis	Cofactor
r1134	ATP[e] + NAD[e] -> ADP[e] + NADP[e]	evm.model.scaffold00007.30	evm.model.scaffold00007.30	NAD kinase	2.7.1.23	Nicotinate and nicotinamide metabolism	Cofactor
r1136	ATP[c] + bDRIBN[c] -> ADP[c] + NICNUCLE[c]	evm.model.scaffold00276.2 or evm.model.scaffold00198.15	evm.model.scaffold00276.2 or evm.model.scaffold00198.15	Nicotinate riboside kinase	2.7.1.173	Nicotinate and nicotinamide metabolism	Cofactor
r1175	PLPNDPI[b] + HBZA[b] -> PPI[b] + HPLPNBZA[b]	evm.model.scaffold00012.69	evm.model.scaffold00012.69	4-hydroxybenzoate polyprenyltransferase	2.5.1.39	Ubiquinone and other terpenoid-quinone biosynthesis	Cofactor
r1176	4CMRE[c] + ATP[c] + COA[c] -> 4CMCOA[c] + AMP[c] + PPI[c]	evm.model.scaffold00286.13 or evm.model.scaffold00017.16 or evm.model.scaffold00003.38 or evm.model.scaffold00017.17 or evm.model.scaffold00022.33 or evm.model.scaffold00126.5	evm.model.scaffold00286.13 or evm.model.scaffold00017.16 or evm.model.scaffold00003.38 or evm.model.scaffold00017.17 or evm.model.scaffold00022.33 or evm.model.scaffold00126.5	4-coumarate-CoA ligase	6.2.1.12	Ubiquinone and other terpenoid-quinone biosynthesis	Cofactor
r1187	FMNH2[c] + NADP[c] -> FMN[c] + NADPH[c]	evm.model.scaffold00153.15	evm.model.scaffold00153.15	FMN reductase	1.5.1.39	Riboflavin metabolism	Cofactor
r1206	RSGT[c] + ALA[c] -> CGLY[c] + ALAGLY[c]	evm.model.scaffold00001.151 or evm.model.scaffold00041.14	evm.model.scaffold00001.151 or evm.model.scaffold00041.14	Gamma-glutamyltranspeptidase	2.3.2.2	Glutathione biosynthesis	Cofactor
r1207	RSGT[p] + ALA[p] -> CGLY[p] + ALAGLY[p]	evm.model.scaffold00041.14	evm.model.scaffold00041.14	Gamma-glutamyltranspeptidase	2.3.2.2	Glutathione biosynthesis	Cofactor
r1211	2 RGT[m] + H2O2[m] -> 2 H2O[m] + RSGT[m]	evm.model.scaffold00007.30	evm.model.scaffold00007.30	Glutathione peroxidase	1.11.1.9	Glutathione biosynthesis	Cofactor
r1214	2 RTHIO[c] + ROOH[c] -> OTHIO[c] + H2O[c] + ROH[c]	evm.model.scaffold00038.23 or evm.model.scaffold00068.32 or evm.model.scaffold00035.9	evm.model.scaffold00038.23 or evm.model.scaffold00068.32 or evm.model.scaffold00035.9	peroxiredoxin	1.11.1.15	Glutathione metabolism	Cofactor
r1215	2 RGT[c] + ROOH[c] -> RGTDS[c] + H2O[c] + ROH[c]	evm.model.scaffold00038.23 or evm.model.scaffold00068.32 or evm.model.scaffold00035.9	evm.model.scaffold00038.23 or evm.model.scaffold00068.32 or evm.model.scaffold00035.9	peroxiredoxin	1.11.1.15	Glutathione metabolism	Cofactor
r1222	2 GGPP[b] -> PTEPPI[b] + PPI[b]	evm.model.scaffold00422.3 or evm.model.scaffold00226.19 or evm.model.scaffold00020.17	evm.model.scaffold00422.3 or evm.model.scaffold00226.19 or evm.model.scaffold00020.17	phytoene synthase	2.5.1.32	Carotenoid biosynthesis	Carotenoid
r1223	PTEPPI[b] -> PTE[b] + PPI[b]	evm.model.scaffold00422.3 or evm.model.scaffold00226.19 or evm.model.scaffold00020.17	evm.model.scaffold00422.3 or evm.model.scaffold00226.19 or evm.model.scaffold00020.17	phytoene synthase	2.5.1.32	Carotenoid biosynthesis	Carotenoid
r1224	PTE[b] + 4 FAD[b] -> LCP[b] + 4 FADH2[b]	evm.model.scaffold00422.2 or evm.model.scaffold00226.18	evm.model.scaffold00422.2 or evm.model.scaffold00226.18	Phytoene desaturase	1.3.99.31	Carotenoid biosynthesis	Carotenoid
r1225	LCP[b] -> GCATE[b]	evm.model.scaffold00422.3 or evm.model.scaffold00226.19	evm.model.scaffold00422.3 or evm.model.scaffold00226.19	lycopene cyclase	5.5.1.19	Carotenoid biosynthesis	Carotenoid
r1226	GCATE[b] -> BCATE[b]	evm.model.scaffold00422.3 or evm.model.scaffold00226.19	evm.model.scaffold00422.3 or evm.model.scaffold00226.19	lycopene cyclase	5.5.1.19	Carotenoid biosynthesis	Carotenoid
r1227	BCATE[b] + O2[b] -> 2 RTN[b]	evm.model.scaffold00038.67	evm.model.scaffold00038.67	beta, beta-carotene 15,15'-dioxygenase	1.13.11.63	Retinol metabolism	Carotenoid
r1228	5.168 ATP[c] + 0.0626 GLU[c] + 0.0591 ASP[c] + 0.0719 ALA[c] + 0.0509 GLY[c] + 0.0493 GLN[c] + 0.0494 ASN[c] + 0.0476 ARG[c] + 0.0493 PRO[c] + 0.0128 CYS[c] + 0.0834 SER[c] + 0.0623 THR[c] + 0.0255 HIS[c] + 0.0579 ILE[c] + 0.033 VAL[c] + 0.0881 LEU[c] + 0.033 TYR[c] + 0.0624 LYS[c] + 0.0249 MET[c] + 0.0111 TRP[c] + 0.0389 PHE[c] -> 5.168 ADP[c] + 5.168 PI[c] + Protein[c]			Transport reaction		Protein formation
r1231	3.739 ATP[c] + 0.302 DATP[c] + 0.198 DGTP[c] + 0.197 DCTP[c] + 0.303 DTTP[c] -> 3.739 ADP[c] + 3.739 PI[c] + DNA[c]			Transport reaction		DNA formation
r1232	153 ATP[c] + 0.44 UDPGE[c] + 0.1676 GDPFUC[c] + 0.0643 MAN[c] + 0.0018 GLYNIN[c] + 0.0026 CHIT[c] + 0.0001 CHITO[c] + 2.7618 Protein[c] + 0.1564 RNA[c] + 0.0891 DNA[c] + 0.3317 Lipid[c] -> 153 ADP[c] + 153 PI[c] + BIOMASS[c]			Transport reaction		Biomass formation
Metabolism
Carbohydrate	22
Energy	18
Amino acids	24
Lipid	13
Cofactor	16
Carotenoid	6
Transport	3

## Sheet: Unique reaction of iWV1213
Supplementary File 2: Unique reactions identified in M. circinelloides strain WJ11 (iNI1159) and reference strain CBS277.49 (iWV1213).
Table S2.2: The unique metabolic reactions of M. circinelloides (iWV1213)
Rxn name	Biochemical reaction	Gene-reaction association	Gene	Protein function	EC number	Subsystem	Metabolism
r49	SUCCOA[m] + GDP[m] + PI[m] <=> COA[m] + GTP[m] + SUCC[m]	MC182842	MC182842	Succinate-CoA ligase (GDP-forming)	6.2.1.4	Tricarboxylic acid cycle	Carbohydrate
r50	PI[c] + SUCCOA[c] + GDP[c] <=> COA[c] + GTP[c] + SUCC[c]	MC154750	MC154750	Succinate-CoA ligase (GDP-forming)	6.2.1.4	Tricarboxylic acid cycle	Carbohydrate
r52	ADP[c] + PI[c] + SUCCOA[c] <=> ATP[c] + COA[c] + SUCC[c]	MC182362	MC182362	Succinate-CoA ligase (ADP-forming)	6.2.1.5	Tricarboxylic acid cycle	Carbohydrate
r54	SUCC[c] + Q[c] <=> FUM[c] + QH2[c]	MC156355 or MC40223 or MC156080 or MC32094 or MC155816 or MC155602	MC156355 or MC40223 or MC156080 or MC32094 or MC155816 or MC155602	Succinate dehydrogenase (ubiquinone)	1.3.5.1	Tricarboxylic acid cycle	Carbohydrate
r130	NADPH[c] + XYL[c] <=> NADP[c] + XOL[c]	MC115261 or MC150877	MC115261 or MC150877	Xylose reductase	1.1.1.21	Hexose sugar metabolism	Carbohydrate
r206	PTATE[e] -> GALUNT[e]	MC181379	MC181379	Polygalacturonase	3.2.1.15	Polysaccharide metabolism	Carbohydrate
r240	DOLMANP[c] + Protein[c] -> DOLP[c] + MANNP[c]	MC151941 or MC160449 or MC112156 or MC116926 or MC141234 or MC146788 or MC151650	MC151941 or MC160449 or MC112156 or MC116926 or MC141234 or MC146788 or MC151650	Dolichyl phosphate mannose protein mannosyltransferase	2.4.1.109	N-Glycan biosynthesis	Glycan
r361	GLX[c] + ALA[c] <=> PYR[c] + GLY[c]			Alanine-glyoxylate aminotransferase	2.6.1.44	Glycine, serine and threonine metabolism	Amino acid
r759	T3P2[m] + 0.243 C160COA[m] + 0.264 C181COA[m] + 0.255 C182COA[m] + 0.209 C183COA[m] + 0.029 C180COA[m] -> COA[m] + AT3P2[m]			Glycerone-phosphate O-acyltransferase	2.3.1.42	Glycerophospholipid biosynthesis	Lipid
r762	0.243 C160COA[m] + 0.264 C181COA[m] + 0.255 C182COA[m] + 0.209 C183COA[m] + 0.029 C180COA[m] + LPA[m] -> COA[m] + PA[m]	MC148013 or MC156700	MC148013 or MC156700	Lysophosphatidic acid acyltransferase	2.3.1.51	Glycerophospholipid biosynthesis	Lipid
r1106	D6RP5P[e] -> NH3[c] + A6RP5P[e]			Diaminohydroxyphosphoribosylaminopyrimidine deaminase	3.5.4.26	Riboflavin, FMN and FAD metabolism	Cofactor
r1144	5.168 ATP[c] + 0.059 GLU[c] + 0.058 ASP[c] + 0.073 ALA[c] + 0.052 GLY[c] + 0.046 GLN[c] + 0.046 ASN[c] + 0.048 ARG[c] + 0.047 PRO[c] + 0.014 CYS[c] + 0.078 SER[c] + 0.06 THR[c] + 0.026 HIS[c] + 0.058 ILE[c] + 0.073 VAL[c] + 0.091 LEU[c] + 0.034 TYR[c] + 0.06 LYS[c] + 0.025 MET[c] + 0.012 TRP[c] + 0.041 PHE[c] -> 5.168 ADP[c] + 5.168 PI[c] + Protein[c]					Protein formation	Transport
r1146	3.739 ATP[c] + 0.302 DATP[c] + 0.198 DGTP[c] + 0.197 DCTP[c] + 0.303 DTTP[c] -> 3.739 ADP[c] + 3.739 PI[c] + DNA[c]					DNA formation	Transport
r1147	80 ATP[c] + 0.5153 UDPGE[c] + 0.1962 GDPFUC[c] + 0.0753 MAN[c] + 0.0018 GLYNIN[c] + 0.00258 CHIT[c] + 0.0001 CHITO[c] + 3.2950 Protein[c] + 0.1831 RNA[c] + 0.0999 DNA[c] + 0.02342 ERGOSE[c] + 0.1441 TAGLY[c] + 0.0039 DAGLY[c] + 0.0063 PC[c] + 0.0014 PA[c] + 0.0085 PE[c] + 0.0006 PS[c] + 0.0104 FFA[c] + 0.0002 PINS[c] -> 80 ADP[c] + 80 PI[c] + BIOMASS[c]					Biomass formation	Transport
r1150	GLAC[e] <=> GLAC[c]					Transport reaction	Transport
r1160	UREA[e] <=> UREA[c]					Transport reaction	Transport
r1161	XYL[e] <=> XYL[c]					Transport reaction	Transport
r1162	ETH[e] <=> ETH[c]					Transport reaction	Transport
r1163	METHOL[e] <=> METHOL[c]					Transport reaction	Transport
r1164	FRU[e] <=> FRU[c]					Transport reaction	Transport
r1165	CELLOB[e] <=> CELLOB[c]					Transport reaction	Transport
r1166	AC[e] <=> AC[c]					Transport reaction	Transport
r1167	FOR[e] <=> FOR[c]					Transport reaction	Transport
r1168	LLAC[e] <=> LLAC[c]					Transport reaction	Transport
r1169	LAC[e] <=> LAC[c]					Transport reaction	Transport
r1170	DGLC[e] <=> DGLC[c]					Transport reaction	Transport
r1171	PYR[c] <=> PYR[e]					Transport reaction	Transport
r1172	NADPH[c] <=> NADPH[e]					Transport reaction	Transport
r1173	NADH[c] <=> NADH[e]					Transport reaction	Transport
r1174	LACT[e] -> LACT[c]					Transport reaction	Transport
r1175	GL[e] <=> GL[c]					Transport reaction	Transport
r1176	FFA[c] <=> FFA[e]					Transport reaction	Transport
r1177	TAGLY[c] -> TAGLY[e]					Transport reaction	Transport
r1178	DAGLY[c] <=> DAGLY[e]					Transport reaction	Transport
r1179	PA[c] <=> PA[e]					Transport reaction	Transport
r1180	ERGOSE[c] <=> ERGOSE[e]					Transport reaction	Transport
r1181	PE[c] <=> PE[e]					Transport reaction	Transport
r1182	PC[c] <=> PC[e]					Transport reaction	Transport
r1183	PS[c] <=> PS[e]					Transport reaction	Transport
r1184	PINS[c] <=> PINS[e]					Transport reaction	Transport
r1185	14GLUCAN[e] <=> 14GLUCAN[c]					Transport reaction	Transport
r1188	LPE[e] <=> LPE[c]					Transport reaction	Transport
r1189	DAGLY[e] <=> DAGLY[c]					Transport reaction	Transport
r1191	ACCOA[c] <=> ACCOA[e]					Transport reaction	Transport
r1285	GLAC[e] <=>					Exchange reaction	Exchange
r1286	XYL[e] <=>					Exchange reaction	Exchange
r1287	ETH[e] <=>					Exchange reaction	Exchange
r1288	MLT[e] <=>					Exchange reaction	Exchange
r1289	LACT[e] <=>					Exchange reaction	Exchange
r1290	SUC[e] <=>					Exchange reaction	Exchange
r1291	GL[e] <=>					Exchange reaction	Exchange
r1292	FRU[e] <=>					Exchange reaction	Exchange
r1293	STAR[e] <=>					Exchange reaction	Exchange
r1294	CELLOB[e] <=>					Exchange reaction	Exchange
r1295	CELLU[e] <=>					Exchange reaction	Exchange
r1296	PYR[e] <=>					Exchange reaction	Exchange
r1297	ACCOA[e] <=>					Exchange reaction	Exchange
r1307	HNO3[e] <=>					Exchange reaction	Exchange
r1310	UREA[e] <=>					Exchange reaction	Exchange
r1312	FFA[e] <=>					Exchange reaction	Exchange
r1313	TAGLY[e] ->					Exchange reaction	Exchange
r1314	DAGLY[e] <=>					Exchange reaction	Exchange
r1315	ERGOSE[e] <=>					Exchange reaction	Exchange
r1316	PA[e] <=>					Exchange reaction	Exchange
r1317	PE[e] <=>					Exchange reaction	Exchange
r1318	PC[e] <=>					Exchange reaction	Exchange
r1319	PS[e] <=>					Exchange reaction	Exchange
r1320	PINS[e] <=>					Exchange reaction	Exchange
r1322	LPE[e] <=>					Exchange reaction	Exchange
r1323	DAGLY[e] <=>					Exchange reaction	Exchange
Metabolism
Carbohydrate	6
Glycan	1
Amino acids	1
Lipid	2
Cofactor	1
Transport	33
Exchange	26
