# Supplementary material for: Metabolic traits specific for lipid-overproducing strain of Mucor circinelloides WJ11 identified by genome-scale modeling approach
Source: PeerJ. 2019 Jun 7;7:e7015. doi: 10.7717/peerj.7015 (PMC6613434; doi:10.7717/peerj.7015)
Supplement: File S6 — Note: iNI1159 model simulation under varying nitrogen uptake fluxes (2 –10 mmol gDW −1 h −1) at glucose uptake rate of 10 mmol gDW −1 h −1. [file peerj-07-7015-s006.xlsx]

## Sheet: RFC of iNI1159
Supplementary File 6: Relative flux change of iNI1159 when nitrogen-limited conditions.
Note: iNI1159 model simulation under varying nitrogen uptake fluxes (2 - 10 mmol gDW-1 h-1) at glucose uptake rate of 10 mmol gDW-1h-1
Rxn name	Biochemical reaction	EC number	N = 2 (mmol gDW-1 h-1)	N = 3 (mmol gDW-1 h-1)	N = 4 (mmol gDW-1 h-1)	N = 5 (mmol gDW-1 h-1)	N = 6 (mmol gDW-1 h-1)	N = 7 (mmol gDW-1 h-1)	N = 8 (mmol gDW-1 h-1)	N = 9 (mmol gDW-1 h-1)	N = 10 (mmol gDW-1 h-1)	Relative flux change
r1	DGLC[e] <=> 0.33 GLC[e] + 0.67 bDGLC[e]		0	0	0	0	0	2.57749e-11	0	0	0	-1.18538e-11
r2	DGLC[c] <=> 0.33 GLC[c] + 0.67 bDGLC[c]		0	0	0	0	0	0	0	0	0	0
r3	GLC[e] <=> bDGLC[e]	5.1.3.3	0	0	0	0	0	0	0	0	0	0
r4	GLC[c] <=> bDGLC[c]	5.1.3.3	0	0	0	0	0	0	0	0	0	0
r5	GLC[b] + ATP[b] -> ADP[b] + G6P[b]	2.7.1.1	0	0	0	0	0	0	0	0	0	0
r6	GLC[c] + ATP[c] -> ADP[c] + G6P[c]	2.7.1.1	10	10	10	10	10	10	10	10	10	1.5705e-09
r7	FRU[c] + ATP[c] -> ADP[c] + FRU1P[c]	2.7.1.3	0	0	0	4.14206e-10	0	0	0	1.81006e-10	0	-5.92409e-11
r8	FRU[b] + ATP[b] -> ADP[b] + FRU1P[b]	2.7.1.3	0	0	0	0	0	0	0	0	0	0
r9	G6P[c] <=> F6P[c]	5.3.1.9	9.92618	9.92618	9.92618	9.92618	9.92618	9.92618	9.92618	9.92618	9.92618	1.16541e-10
r10	G6P[c] <=> bDG6P[c]	5.1.3.15	1.83364e-09	-2.61212e-09	-1.48945e-09	3.7941e-09	-6.47354e-10	-4.23831e-09	-1.53069e-09	3.82544e-09	-1.41559e-09	8.27413e-10
r11	ATP[c] + F6P[c] -> ADP[c] + FDP[c]	2.7.1.11	9.32327	8.92327	8.52327	8.12327	7.72327	7.32327	6.92327	6.52327	6.12327	11.0375
r12	FDP[c] <=> T3P2[c] + T3P1[c]	4.1.2.13	9.32327	8.92327	8.52327	8.12327	7.72327	7.32327	6.92327	6.52327	6.12327	11.0375
r13	T3P2[c] <=> T3P1[c]	5.3.1.1	8.7155	8.35174	7.98798	7.62422	7.26046	6.8967	6.53294	6.16918	5.80542	10.0375
r14	T3P1[c] + PI[c] + NAD[c] <=> 13PDG[c] + NADH[c]	1.2.1.12	18.2222	17.6584	17.0946	16.5309	15.9671	15.4034	14.8396	14.2758	13.7121	15.5563
r15	ADP[c] + 13PDG[c] <=> ATP[c] + 3PG[c]	2.7.2.3	18.2222	17.6584	17.0946	16.5309	15.9671	15.4034	14.8396	14.2758	13.7121	15.5563
r16	3PG[c] <=> 2PG[c]	5.4.2.1	18.2222	17.6584	17.0946	16.5309	15.9671	15.4034	14.8396	14.2758	13.7121	15.5563
r17	2PG[c] <=> PEP[c] + H2O[c]	4.2.1.11	18.2222	17.6584	17.0946	16.5309	15.9671	15.4034	14.8396	14.2758	13.7121	15.5563
r18	ADP[c] + PEP[c] -> ATP[c] + PYR[c]	2.7.1.40	18.1455	17.5818	17.018	16.4543	15.8905	15.3267	14.763	14.1992	13.6355	15.5563
r19	FDP[c] + H2O[c] -> F6P[c] + PI[c]	3.1.3.11	9.88649e-11	8.18602e-10	-5.05072e-10	3.0042e-09	-1.90121e-10	2.51533e-09	-5.16682e-10	1.22593e-09	-4.72767e-10	7.25092e-10
r20	ATP[c] + OA[c] -> ADP[c] + PEP[c] + CO2[c]	4.1.1.49	-9.12586e-11	2.2671e-10	-1.31122e-10	-3.45608e-11	-5.91334e-10	5.02908e-10	8.43556e-11	7.23702e-10	-2.02036e-10	-9.27286e-10
r21	ETH[c] + NADP[c] <=> ACAL[c] + NADPH[c]	1.1.1.2	1000	1000	1000	1000	1000	1000	1000	1000	1000	0
r22	ETH[c] + NAD[c] <=> NADH[c] + ACAL[c]	1.1.1.1	1000	1000	1000	1000	1000	1000	1000	1000	1000	0
r23	ETH[m] + NAD[m] <=> ACAL[m] + NADH[m]	1.1.1.1	1000	1000	1000	1000	1000	1000	1000	1000	1000	0
r24	NADP[c] + GL[c] <=> NADPH[c] + GLYAL[c]	1.1.1.1	1000	1000	1000	1000	1000	1000	1000	1000	1000	0
r25	NAD[c] + GL[c] <=> NADH[c] + GLYAL[c]	1.1.1.1	1000	1000	1000	1000	1000	1000	1000	1000	1000	0
r26	NAD[m] + GL[m] <=> NADH[m] + GLYAL[m]	1.1.1.1	0	0	0	0	0	0	0	0	0	0
r27	GL[e] + NAD[e] <=> GLYAL[e] + NADH[e]	1.1.1.1	0	0	0	0	0	0	0	0	0	0
r28	NAD[c] + GL[c] <=> NADH[c] + GLYAL[c]	1.1.1.1	1000	1000	1000	1000	1000	1000	1000	1000	1000	0
r29	NAD[m] + PYR[m] + COA[m] -> NADH[m] + ACCOA[m] + CO2[m]	1.2.4.1: 2.3.1.12: 1.8.1.4	17.3335	16.5698	15.806	15.0423	14.2785	13.5147	12.751	11.9872	11.2235	21.0751
r30	bDG6P[c] + NADP[c] -> NADPH[c] + D6PGL[c]	1.1.1.49	-5.1738e-09	3.81232e-09	-4.91291e-10	8.03548e-09	1.5788e-09	4.77596e-09	-6.42919e-09	1.9887e-09	-1.4149e-09	2.56189e-09
r31	H2O[c] + D6PGL[c] -> D6PGC[c]	3.1.1.31	-5.1738e-09	3.81232e-09	-4.91291e-10	8.03548e-09	1.5788e-09	4.77596e-09	-6.42919e-09	1.9887e-09	-1.4149e-09	2.56189e-09
r32	D6PGL[e] + H2O[e] -> D6PGC[e]	3.1.1.31	-9.59568e-10	0	0	8.72567e-11	1.28694e-09	0	0	0	0	-1.72508e-09
r33	NADP[c] + D6PGC[c] -> CO2[c] + NADPH[c] + RL5P[c]	1.1.1.44	-5.30414e-09	3.81232e-09	-4.91291e-10	-3.96798e-09	1.58029e-09	4.77596e-09	-6.42919e-09	1.9887e-09	-1.4149e-09	-3.19824e-09
r34	RL5P[c] <=> XUL5P[c]	5.1.3.1	-0.5637	-0.9637	-1.3637	-1.7637	-2.1637	-2.5637	-2.9637	-3.3637	-3.7637	11.0375
r35	RL5P[c] <=> R5P[c]	5.3.1.6	0.5637	0.9637	1.3637	1.7637	2.1637	2.5637	2.9637	3.3637	3.7637	-11.0375
r36	XUL5P[c] + R5P[c] <=> T3P1[c] + S7P[c]	2.2.1.1	-0.262698	-0.462698	-0.662698	-0.862698	-1.0627	-1.2627	-1.4627	-1.6627	-1.8627	5.51877
r37	XUL5P[c] + E4P[c] <=> F6P[c] + T3P1[c]	2.2.1.1	-0.301002	-0.501002	-0.701002	-0.901002	-1.101	-1.301	-1.501	-1.701	-1.901	5.51877
r38	T3P1[c] + S7P[c] <=> F6P[c] + E4P[c]	2.2.1.2	-0.262698	-0.462698	-0.662698	-0.862698	-1.0627	-1.2627	-1.4627	-1.6627	-1.8627	5.51877
r39	DEORIPI[c] <=> T3P1[c] + ACAL[c]	4.1.2.4	-1.02696e-09	7.20494e-10	-9.44311e-11	-2.88745e-09	3.01349e-10	1.46308e-09	-1.24389e-09	1.01786e-09	-2.74139e-10	-2.73869e-09
r40	ATP[c] + RIB[c] -> ADP[c] + R5P[c]	2.7.1.15	0	0	0	0	0	0	0	0	0	0
r41	ATP[c] + GLCNT[c] -> ADP[c] + D6PGC[c]	2.7.1.12	0	0	0	0	0	0	0	0	0	0
r42	R5P[c] <=> R1P[c]	5.4.2.2	-1.02696e-09	7.20494e-10	-9.44311e-11	-2.88745e-09	3.01349e-10	1.6717e-09	-1.24389e-09	1.01786e-09	-2.74139e-10	-2.83463e-09
r43	DR1P[c] <=> DEORIPI[c]	5.4.2.7	-1.02696e-09	7.20494e-10	-9.44311e-11	-2.88745e-09	3.01349e-10	1.86855e-09	-1.24389e-09	1.01786e-09	-2.74139e-10	-2.92517e-09
r44	ACCOA[m] + H2O[m] + OA[m] <=> COA[m] + CIT[m]	2.3.3.1	1.14627	1.3305	1.51473	1.69896	1.88319	2.06742	2.25165	2.43588	2.62011	-5.08363
r45	CIT[m] <=> H2O[m] + ACO[m]	4.2.1.3	1.40221	1.78644	2.17067	2.5549	2.93913	3.32336	3.70759	4.09182	4.47605	-10.6024
r46	CIT[c] <=> H2O[c] + ACO[c]	4.2.1.3	1000	1000	1000	1000	1000	1000	1000	1000	1000	0
r47	ACO[m] + H2O[m] <=> ICIT[m]	4.2.1.3	1.40221	1.78644	2.17067	2.5549	2.93913	3.32336	3.70759	4.09182	4.47605	-10.6024
r48	ACO[c] + H2O[c] <=> ICIT[c]	4.2.1.3	1000	1000	1000	1000	1000	1000	1000	1000	1000	0
r49	NAD[m] + ICIT[m] -> NADH[m] + CO2[m] + AKG[m]	1.1.1.41	1.40221	1.78644	2.17067	2.5549	2.93913	3.32336	3.70759	4.09182	4.47605	-10.6024
r50	NADP[c] + ICIT[c] -> CO2[c] + NADPH[c] + AKG[c]	1.1.1.42	1.40221	1.78644	2.17067	2.5549	2.93913	3.32336	3.70759	4.09182	4.47605	-10.6024
r51	NAD[m] + COA[m] + AKG[m] -> NADH[m] + CO2[m] + SUCCOA[m]	1.2.4.2: 2.3.1.61: 1.8.1.4	1.27705	1.66128	2.04551	2.42974	2.81397	3.1982	3.58243	3.96666	4.35089	-10.6024
r52	NAD[c] + COA[c] + AKG[c] -> NADH[c] + CO2[c] + SUCCOA[c]	1.2.4.2: 2.3.1.61: 1.8.1.4	0	0	0	0	0	0	0	0	0	0
r53	SUCCOA[m] + PI[m] + ADP[m] <=> COA[m] + SUCC[m] + ATP[m]	6.2.1.5	1.27705	1.66128	2.04551	2.42974	2.81397	3.1982	3.58243	3.96666	4.35089	-10.6024
r54	SUCC[m] + Q[m] <=> FUM[m] + QH2[m]	1.3.5.1	1.37029	1.75452	2.13875	2.52298	2.90721	3.29144	3.67568	4.05991	4.44414	-10.6024
r55	FUM[c] + FADH2[m] -> SUCC[c] + FAD[m]	1.3.99.1	-1.99184e-09	-2.51614e-10	6.71094e-10	-4.9619e-10	-2.53714e-10	6.23459e-10	-2.54712e-09	9.00413e-10	-5.85253e-10	-1.7318e-09
r56	H2O[c] + FUM[c] <=> MAL[c]	4.2.1.2	1000	1000	1000	1000	1000	1000	1000	1000	1000	0
r57	H2O[m] + FUM[m] <=> MAL[m]	4.2.1.2	1000	1000	1000	1000	1000	1000	1000	1000	1000	0
r58	NAD[m] + MAL[m] <=> NADH[m] + OA[m]	1.1.1.37	1.55224	2.13647	2.7207	3.30493	3.88917	4.4734	5.05763	5.64186	6.22609	-16.1212
r59	NAD[c] + MAL[c] <=> NADH[c] + OA[c]	1.1.1.37	1000	1000	1000	1000	1000	1000	1000	1000	1000	0
r60	NAD[p] + MAL[p] <=> NADH[p] + OA[p]	1.1.1.37	0	0	0	0	0	0	0	0	0	0
r61	CIT[c] <=> OA[c] + AC[c]	4.1.3.6	-0.25594	-0.45594	-0.65594	-0.85594	-1.05594	-1.25594	-1.45594	-1.65594	-1.85594	5.51877
r62	ATP[c] + COA[c] + CIT[c] -> ADP[c] + PI[c] + OA[c] + ACCOA[c]	2.3.3.8	-1.68227e-09	8.40391e-10	-1.60837e-10	-3.74322e-10	1.03927e-08	9.67139e-10	-2.08335e-09	7.60874e-10	-4.60789e-10	-9.8594e-10
r63	ACCOA[p] + H2O[p] + GLX[p] -> MAL[p] + COA[p]	2.3.3.9	0	0	0	0	0	0	0	0	0	0
r64	ACCOA[m] + H2O[m] + GLX[m] -> COA[m] + MAL[m]	2.3.3.9	0	0	0	0	0	0	0	0	0	0
r65	ACCOA[c] + H2O[c] + GLX[c] -> COA[c] + MAL[c]	2.3.3.9	-7.66382e-10	-2.95911e-10	-5.88192e-11	-1.4842e-10	6.61819e-10	4.63752e-10	-7.38953e-10	2.02545e-09	-1.59686e-10	-3.97479e-09
r66	ICIT[p] -> GLX[p] + SUCC[p]	4.1.3.1	0	0	0	0	0	0	0	0	0	0
r67	ICIT[b] -> GLX[b] + SUCC[b]	4.1.3.1	0	0	0	0	0	0	0	0	0	0
r68	GLYCOLA[c] + NAD[c] <=> GLX[c] + NADH[c]	1.1.1.26	1000	1000	1000	1000	1000	1000	1000	1000	1000	0
r69	HXPYR[c] + NADH[c] -> GLYCTE[c] + NAD[c]	1.1.1.26	0	0	0	0	0	0	0	0	0	0
r70	GLYCOLA[c] + NADP[c] <=> GLX[c] + NADPH[c]	1.1.1.79	1000	1000	1000	1000	1000	1000	1000	1000	1000	0
r71	HXPYR[c] + NADPH[c] -> GLYCTE[c] + NADP[c]	1.1.1.79	0	0	0	0	0	0	0	0	0	0
r72	PYR[c] -> CO2[c] + ACAL[c]	4.1.1.1	17.3335	16.5698	15.806	15.0423	14.2785	13.5147	12.751	11.9872	11.2235	21.0751
r73	PYR[b] -> CO2[b] + ACAL[b]	4.1.1.1	0	0	0	0	0	0	0	0	0	0
r74	RGT[c] + MTHGXL[c] <=> LGT[c]	4.4.1.5	0	0	0	0	0	0	0	0	0	0
r75	LGT[c] + H2O[c] -> RGT[c] + LAC[c]	3.1.2.6	0	0	0	0	0	0	0	0	0	0
r76	LGT[e] + H2O[e] -> RGT[e] + LAC[e]	3.1.2.6	0	0	0	0	0	0	0	0	0	0
r77	ATP[c] + COA[c] + AC[c] -> ACCOA[c] + AMP[c] + PPI[c]	6.2.1.1	4.06895e-09	4.31058e-10	-8.5322e-11	-1.99976e-10	4.75166e-10	4.96827e-10	-1.04274e-09	3.75962e-10	-1.17675e-09	1.02861e-08
r78	ATP[p] + COA[p] + AC[p] -> ACCOA[p] + AMP[p] + PPI[p]	6.2.1.1	0	0	0	0	0	0	0	0	0	0
r79	NAD[c] + ACAL[c] + H2O[c] <=> NADH[c] + AC[c]	1.2.1.3	1000	1000	1000	1000	1000	1000	1000	1000	1000	0
r80	NAD[m] + ACAL[m] + H2O[m] <=> NADH[m] + AC[m]	1.2.1.3	1000	1000	1000	1000	1000	1000	1000	1000	1000	0
r81	NAD[e] + ACAL[e] + H2O[e] <=> NADH[e] + AC[e]	1.2.1.3	0	0	0	0	0	0	0	0	0	0
r82	NADP[b] + ACAL[b] + H2O[b] <=> AC[b] + NADPH[b]	1.2.1.5	0	0	0	0	0	0	0	0	0	0
r83	NADP[m] + ACAL[m] + H2O[m] <=> AC[m] + NADPH[m]	1.2.1.5	1000	1000	1000	1000	1000	1000	1000	1000	1000	0
r84	NAD[c] + HYGTA[c] -> NADH[c] + FGT[c]	1.1.1.284	0	0	0	0	0	0	0	0	0	0
r85	H2O[c] + ACCOA[c] -> COA[c] + AC[c]	3.1.2.1	999.744	999.544	999.344	999.144	998.944	998.744	998.544	998.344	998.144	5.51877
r86	NAD[c] + METHOL[c] <=> NADH[c] + FALD[c]	1.1.1.1	0	0	0	0	0	0	0	0	0	0
r87	NAD[m] + METHOL[m] <=> NADH[m] + FALD[m]	1.1.1.1	0	0	0	0	0	0	0	0	0	0
r88	NAD[e] + METHOL[e] <=> NADH[e] + FALD[e]	1.1.1.1	0	0	0	0	0	0	0	0	0	0
r89	ATP[c] + PYR[c] + HCO3[c] -> ADP[c] + PI[c] + OA[c]	6.4.1.1	0.573961	0.773961	0.973961	1.17396	1.37396	1.57396	1.77396	1.97396	2.17396	-5.51877
r90	MAL[c] + NADP[c] -> PYR[c] + CO2[c] + NADPH[c]	1.1.1.40	-2.28724e-11	1.43105e-10	1.66586e-10	-8.45476e-10	4.7204e-11	2.8296e-09	-1.04572e-10	7.1956e-10	-4.63116e-10	-1.42621e-09
r91	MAL[m] + NADP[m] -> PYR[m] + CO2[m] + NADPH[m]	1.1.1.40	-8.23781e-11	1.44553e-10	1.18949e-10	-8.45346e-10	6.99947e-11	2.83421e-09	-1.03716e-10	7.18833e-10	3.55164e-09	-8.96485e-09
r92	MAL[m] + NAD[m] -> PYR[m] + CO2 [m]+ NADH[m]	1.1.1.38	0	0	0	0	0	0	0	0	0	0
r93	NAD[c] + LLAC[c] -> NADH[c] + PYR[c]	1.1.1.27	0	0	0	0	0	0	0	0	0	0
r94	LLAC[c] + 2 FERI[c] -> PYR[c] + 2 FERO[c]	1.1.2.3	0	0	2.14679e-10	-5.65727e-10	0	4.35182e-10	-3.27276e-11	4.89109e-10	4.4281e-10	-1.72216e-09
r95	2 NAD[c] + H2O[c] + UDPG[c] -> 2 NADH[c] + UDPGE[c]	1.1.1.22	0.073524	0.073524	0.073524	0.073524	0.073524	0.073524	0.073524	0.073524	0.073524	5.86577e-32
r96	H2O[c] + UDPGE[c] -> UDP[c] + GLUCRE[c]	2.4.1.17	0	0	0	0	0	0	0	0	0	0
r97	H2O[m] + UDPGE[m] -> UDP[m] + GLUCRE[m]	2.4.1.17	0	0	0	0	0	0	0	0	0	0
r98	H2O[p] + UDPGE[p] -> UDP[p] + GLUCRE[p]	2.4.1.17	0	0	0	0	0	0	0	0	0	0
r99	H2O[b] + UDPGE[b] -> UDP[b] + GLUCRE[b]	2.4.1.17	0	0	0	0	0	0	0	0	0	0
r100	NAD[e] + DEXG[e] <=> NADH[e] + DEHXG[e]	1.1.1.125	0	0	0	0	0	0	0	0	0	0
r101	NAD[m] + DEXG[m] <=> NADH[m] + DEHXG[m]	1.1.1.125	0	0	0	0	0	0	0	0	0	0
r102	NAD[c] + DEXG[c] <=> NADH[c] + DEHXG[c]	1.1.1.125	0	0	0	0	0	0	0	0	0	0
r103	H2O[c] + FGT[c] <=> RGT[c] + FOR[c]	3.1.2.12	0	0	0	0	0	0	0	0	0	0
r104	LAC[c] + 2 FERI[c] -> PYR[c] + 2 FERO[c]	1.1.2.4	0	0	0	0	0	0	0	0	0	0
r105	LAC[m] + 2 FERI[m] -> PYR[m] + 2 FERO[m]	1.1.2.4	0	0	0	0	0	0	0	0	0	0
r106	PTATE[e] -> GALUNT[e]	3.2.1.15	0	0	0	0	0	0	0	0	0	0
r107	PTATE[e] -> DGALNT[e]	3.2.1.15	0	0	0	0	0	0	0	0	0	0
r108	DGALNT[e] -> GALUNT[e]	3.2.1.67	0	0	0	0	0	0	0	0	0	0
r109	ATP[c] + COA[c] + PROP[c] -> AMP[c] + PPI[c] + PROPCOA[c]	6.2.1.17	0	0	0	-2.54019e-13	0	0	0	0	0	-1.16823e-13
r110	ATP[m] + PROPCOA[m] + HCO3[m] -> PI[m] + ADP[m] + MMCOA[m]	6.4.1.3	0	0	0	0	0	0	0	0	0	0
r111	ATP[p] + PROPCOA[p] + HCO3[p] -> ADP[p] + PI[p] + MMCOA[p]	6.4.1.3	0	0	0	0	0	0	0	0	0	0
r112	SAM[c] -> ACPC[c] + 5MTA[c]	4.4.1.14	0	0	0	0	0	0	0	2.9472e-10	0	-4.06623e-10
r113	SAM[b] -> ACPC[b] + 5MTA[b]	4.4.1.14	0	0	0	0	0	0	0	0	0	0
r114	ATP[c] + COA[c] + ACTAC[c] -> AMP[c] + PPI[c] + AACCOA[c]	6.2.1.16	-6.93873e-11	-2.80682e-11	-3.79902e-11	-1.01283e-11	-1.47177e-11	9.3201e-11	-8.53767e-12	7.98002e-11	-4.2045e-11	-2.73735e-10
r115	NADP[m] + C4HCOA[m] <=> NADPH[m] + AACCOA[m]	1.1.1.157	1000	1000	1000	1000	1000	1000	1000	1000	1000	0
r116	FAD[m] + HYDGLR[m] <=> AKG[m] + FADH2[m]	1.1.99.2	0	0	0	0	0	0	0	0	0	0
r117	H2O[m] + CRONYLCOA[m] <=> C4HCOA_R[m]	4.2.1.55	53.683	58.3651	63.0472	67.7294	72.4115	77.0937	81.7758	86.458	91.1401	-129.198
r118	C4HCOA_R[m] <=> C4HCOA[m]	5.1.2.3	53.683	58.3651	63.0472	67.7294	72.4115	77.0937	81.7758	86.458	91.1401	-129.198
r119	CRONYLCOA[m] <=> C4HCOA[m]	4.2.1.17	1000	1000	1000	1000	1000	1000	1000	1000	1000	0
r120	CRONYLCOA[c] <=> C4HCOA[c]	4.2.1.17	0	0	0	0	0	0	0	0	0	0
r121	MALCOA[c] -> ACCOA[c] + CO2[c]	4.1.1.9	-1.1701e-10	-6.15828e-10	5.94774e-09	1.01442e-10	6.95353e-10	5.96219e-11	5.27836e-11	1.14276e-10	-5.89688e-11	4.32729e-09
r122	MICIT[p] <=> PYR[p] + SUCC[p]	4.1.3.30	0	0	0	0	0	0	0	0	0	0
r123	ATP[c] + GLAC[c] -> ADP[c] + GAL1P[c]	2.7.1.6	0	0	0	0	0	0	0	0	0	0
r124	UDPGAL[c] <=> UDPG[c]	5.1.3.2	0	0	0	0	0	0	0	0	0	0
r125	UDPGAL[m] <=> UDPG[m]	5.1.3.2	0	0	0	0	0	0	0	0	0	0
r126	G1P[c] + UTP[c] <=> PPI[c] + UDPG[c]	2.7.7.9	0.0738248	0.0738248	0.0738248	0.0738248	0.0738248	0.0738248	0.0738248	0.0738248	0.0738248	6.24555e-10
r127	UDPGE[m] -> CO2[m] + UDPXYL[m]	4.1.1.35	1.10074e-10	6.43876e-11	5.83e-11	6.14448e-11	1.6712e-11	1.68427e-10	6.21156e-11	8.44693e-11	0	1.22073e-10
r128	UDPGE[c] -> CO2[c] + UDPXYL[c]	4.1.1.35	0	0	0	0	0	0	0	0	0	0
r129	G6P[c] <=> G1P[c]	5.4.2.2	0.0738248	0.0738248	0.0738248	0.0738248	0.0738248	0.0738248	0.0738248	0.0738248	0.0738248	5.30295e-10
r130	UDPG[c] + GAL1P[c] <=> G1P[c] + UDPGAL[c]	2.7.7.12	0	0	5.17079e-11	0	0	0	0	0	0	4.75606e-11
r131	GLAC[c] + O2[c] -> GALNT[c] + H2O2[c]	1.1.3.9	0	0	0	0	0	0	0	0	0	0
r132	ATP[c] + XUL[c] -> ADP[c] + XUL5P[c]	2.7.1.17	9.22677e-11	4.57577e-11	0	0	1.22811e-11	1.60657e-10	4.51903e-11	5.06897e-11	-1.58256e-10	3.38605e-10
r133	ATP[c] + RL[c] -> ADP[c] + RL5P[c]	2.7.1.47	0	0	0	0	0	0	0	0	0	0
r134	NAD[c] + XOL[c] <=> NADH[c] + XUL[c]	1.1.1.9	9.22677e-11	4.57577e-11	0	0	1.22811e-11	1.60657e-10	4.51903e-11	5.06897e-11	-1.58256e-10	3.38605e-10
r135	NADP[c] + XYL[c] -> NADPH[c] + XYLLAC[c]	1.1.1.179	0	0	0	0	0	0	0	0	0	0
r136	NADP[c] + ARAB[c] -> NADPH[c] + ARABLAC[c]	1.1.1.117	0	0	0	0	0	0	0	0	0	0
r137	LARAB[e] + ATP[e] -> LARABP[e] + ADP[e]	2.7.1.46	0	0	0	0	0	0	0	0	0	0
r138	NADPH[c] + XYL[c] <=> NADP[c] + XOL[c]	1.1.1.21	0	0	0	0	0	0	0	0	0	0
r139	NADPH[c] + XYL[c] -> NADP[c] + XOL[c]	1.1.1.307	1000	1000	1000	1000	1000	1000	1000	1000	1000	0
r140	MAN6P[c] <=> F6P[c]	5.3.1.8	-0.0387505	-0.0387505	-0.0387505	-0.0387505	-0.0387505	-0.0387505	-0.0387505	-0.0387505	-0.0387505	0
r141	ATP[c] + FRU[c] -> ADP[c] + F6P[c]	2.7.1.1	0	0	0	4.4956e-11	0	0	0	0	0	2.06752e-11
r142	ATP[b] + FRU[b] -> ADP[b] + F6P[b]	2.7.1.1	0	0	0	0	0	0	0	0	0	0
r143	ATP[c] + F6P[c] -> ADP[c] + F26P[c]	2.7.1.105	1.61355e-09	5.24167e-10	5.3947e-10	6.47522e-10	2.2223e-10	1.58089e-09	-2.22533e-09	5.84103e-09	-1.34581e-09	2.22168e-10
r144	F26P[c] + H2O[c] -> F6P[c] + PI[c]	3.1.3.46	1.61355e-09	5.24167e-10	5.3947e-10	6.47522e-10	2.2223e-10	1.58089e-09	-2.22533e-09	5.84103e-09	-1.34581e-09	2.22168e-10
r145	FUCUL1P[c] -> T3P2[c] + LACAL[c]	4.1.2.17	0	0	0	0	0	0	0	0	0	0
r146	FUCUL1P[m] -> T3P2[m] + LACAL[m]	4.1.2.17	0	0	0	0	0	0	0	0	0	0
r147	MAN1P[c] <=> MAN6P[c]	5.4.2.8	-0.22308	-0.42308	-0.62308	-0.82308	-1.02308	-1.22308	-1.42308	-1.62308	-1.82308	5.51877
r148	MAN1P[m] <=> MAN6P[m]	5.4.2.8	0	0	0	0	0	0	0	0	0	0
r149	GTP[c] + MAN1P[c] -> PPI[c] + GDPMAN[c]	2.7.7.13	0.22308	0.42308	0.62308	0.82308	1.02308	1.22308	1.42308	1.62308	1.82308	-5.51877
r150	GTP[m] + MAN1P[m] -> PPI[m] + GDPMAN[m]	2.7.7.13	0	0	0	0	0	0	0	0	0	0
r151	GDPMAN[c] -> H2O[c] + GDPDDMAN[c]	4.2.1.47	0.028006	0.028006	0.028006	0.028006	0.028006	0.028006	0.028006	0.028006	0.028006	1.46644e-32
r152	NADPH[c] + GDPDDMAN[c] -> NADP[c] + GDPFUC[c]	1.1.1.271	0.028006	0.028006	0.028006	0.028006	0.028006	0.028006	0.028006	0.028006	0.028006	1.46644e-32
r153	NAD[c] + SOT[c] -> FRU[c] + NADH[c]	1.1.1.14	0	0	0	0	0	0	0	0	0	0
r154	NAD[m] + SOT[m] -> FRU[m] + NADH[m]	1.1.1.14	0	0	0	0	0	0	0	0	0	0
r155	ATP[c] + MAN[c] -> ADP[c] + MAN6P[c]	2.7.1.1	0.18433	0.38433	0.58433	0.78433	0.98433	1.18433	1.38433	1.58433	1.78433	-5.51877
r156	ATP[b] + MAN[b] -> ADP[b] + MAN6P[b]	2.7.1.1	0	0	0	0	0	0	0	0	0	0
r157	GLC[e] + FRU[e] -> GLCLACNE[e] + GLCOL[e]	1.1.99.28	0	0	0	0	0	0	0	0	0	0
r158	GLC[c] + FRU[c] -> GLCLACNE[c] + GLCOL[c]	1.1.99.28	0	0	0	0	0	0	0	0	0	0
r159	14MNAN[c] -> MAN[c]	3.2.1.78	0	0	0	0	0	0	0	0	0	0
r160	MELI[c] + H2O[c] -> GLC[c] + GLAC[c]	3.2.1.22	0	0	0	0	0	0	0	0	0	0
r161	STAOSE[c] + H2O[c] -> GLAC[c] + MELI[c]	3.2.1.22	0	0	0	0	0	0	0	0	0	0
r162	GLACMYOI[e] + RAF[e] -> MYOI[e] + STAOSE[e]	2.4.1.67	0	0	0	0	0	0	0	0	0	0
r163	G6P[c] + UDPG[c] -> UDP[c] + TRE6P[c]	2.4.1.15	0	0	0	0	0	0	0	0	0	0
r164	H2O[c] + TRE[c] -> 2 DGLC[c]	3.2.1.28	0	0	0	0	0	0	0	0	0	0
r165	H2O[e] + TRE[e] -> 2 DGLC[e]	3.2.1.28	0	0	0	0	0	0	0	0	0	0
r166	H2O[c] + MLT[c] -> 2 GLC[c]	3.2.1.20	0	0	0	0	0	0	0	0	0	0
r167	H2O[e] + MLT[e] -> 2 GLC[e]	3.2.1.20	0	0	0	0	0	0	0	0	0	0
r168	H2O[c] + SUC[c] -> GLC[c] + FRU[c]	3.2.1.20	0	0	0	0	0	0	0	0	0	0
r169	H2O[e] + SUC[e] -> GLC[e] + FRU[e]	3.2.1.20	0	0	0	0	0	0	0	0	0	0
r170	H2O[p] + SUC[p] -> GLC[p] + FRU[p]	3.2.1.20	0	0	0	0	0	0	0	0	0	0
r171	H2O[c] + LACT[c] -> GLC[c] + GLAC[c]	3.2.1.23	0	0	0	0	0	0	0	0	0	0
r172	H2O[b] + LACT[b] -> GLC[b] + GLAC[b]	3.2.1.23	0	0	0	0	0	0	0	0	0	0
r173	TRE6P[c] + H2O[c] -> TRE[c] + PI[c]	3.1.3.12	0	0	0	0	0	0	0	0	0	0
r174	NAGA6P[c] <=> NAGA1P[c]	5.4.2.3	0.00045117	0.00045117	0.00045117	0.00045117	0.00045117	0.00045117	0.00045117	0.00045117	0.00045117	0
r175	UTP[c] + NAGA1P[c] <=> PPI[c] + UDPNAG[c]	2.7.7.23	0.00045117	0.00045117	0.00045117	0.00045117	0.00045117	0.00045117	0.00045117	0.00045117	0.00045117	0
r176	UDPG[c] -> UDP[c] + 13GLUCAN[c]	2.4.1.34	0	0	0	0	0	0	0	0	0	0
r177	UDPG[b] -> UDP[b] + 13GLUCAN[b]	2.4.1.34	0	0	0	0	0	0	0	0	0	0
r178	CELLU[e] -> 14GLUCAN[e] + CELLOB[e]	3.2.1.4	0	0	0	0	0	0	0	0	0	0
r179	CELLU[b] -> 14GLUCAN[b] + CELLOB[b]	3.2.1.4	0	0	0	0	0	0	0	0	0	0
r180	CELLU[e] -> 13GLUCAN[e]	3.2.1.4	0	0	0	0	0	0	0	0	0	0
r181	CELLOB[c] -> bDGLC[c]	3.2.1.21	0	0	0	0	0	0	0	0	0	0
r182	14GLUCAN[c] -> bDGLC[c]	3.2.1.21	0	0	0	0	0	0	0	0	0	0
r183	GDPMAN[c] -> MANNAN[c]	2.4.1.-	0.195074	0.395074	0.595074	0.795074	0.995074	1.19507	1.39507	1.59507	1.79507	-5.51877
r184	MANNAN[c] -> MAN[c]	3.2.1.113; 3.2.1.24	0.195074	0.395074	0.595074	0.795074	0.995074	1.19507	1.39507	1.59507	1.79507	-5.51877
r185	STAR[c] -> GLC[c]	3.2.1.3	8.50862e-10	-2.55262e-10	2.31604e-10	3.7271e-10	-1.60168e-09	1.02255e-09	-6.01919e-10	3.1775e-10	-6.56255e-10	2.4497e-09
r186	STAR[b] -> GLC[b]	3.2.1.3	0	0	0	0	0	0	0	0	0	0
r187	STAR[e] -> GLC[e]	3.2.1.3	9.07775e-11	0	0	0	0	0	-1.52419e-10	8.62883e-11	-1.92905e-10	5.43002e-10
r188	UDPG[c] -> UDP[c] + GLYNIN[c]	2.4.1.11	0.000300782	0.00030078	0.00030078	0.00030078	0.00030078	0.000300781	0.000300779	0.00030078	0.000300779	3.96992e-09
r189	ATP[c] + G1P[c] -> ADPGLC[c] + PPI[c]	2.7.7.27	0	0	0	0	0	0	0	0	0	0
r190	ADPGLC[m] -> ADP[m] + GLYNIN[m]	2.4.1.21	0	0	0	0	0	0	0	0	0	0
r191	ADPGLC[p] -> ADP[p] + GLYNIN[p]	2.4.1.21	0	0	0	0	0	0	0	0	0	0
r192	GLYNIN[c] -> STAR[c]	2.4.1.18	1.67676e-09	-2.55262e-10	2.31604e-10	3.7271e-10	1.34455e-10	1.02255e-09	-6.01919e-10	3.17094e-10	-6.56255e-10	3.96992e-09
r193	STAR[c] + PI[c] -> G1P[c] + GLYCODEX[c]	2.4.1.1	-4.08101e-10	5.34868e-11	0	0	1.40531e-11	0	-1.56517e-10	6.52751e-11	-3.77327e-10	7.10871e-11
r194	STAR[e] + PI[e] -> G1P[e] + GLYCODEX[e]	2.4.1.1	-3.73266e-10	0	0	0	0	0	0	0	1.04636e-11	-7.05905e-10
r195	GLYCODEX[c] -> bDGLC[c]	2.4.1.25	-4.08101e-10	5.34868e-11	0	0	1.40531e-11	0	-1.56517e-10	6.52751e-11	-3.77327e-10	7.10871e-11
r196	PI[c] + MLTOSE[c] -> G1P[c] + MLTIOSE[c]	2.4.1.1	0	0	0	0	0	0	0	0	0	0
r197	H2O[e] + MLTIOSE[e] -> GLC[e] + MLT[e]	3.2.1.20	0	0	2.40838e-11	-5.7806e-11	2.41585e-13	0	0	2.4265e-11	1.20499e-11	-6.00778e-11
r198	H2O[c] + MLTIOSE[c] -> GLC[c] + MLT[c]	3.2.1.20	0	0	0	0	0	0	0	0	0	0
r199	H2O[c] + CHIB[c] -> NAG[c]	3.2.1.52	0	0	0	0	0	0	0	0	0	0
r200	H2O[e] + CHIB[e] -> NAG[e]	3.2.1.52	0	0	0	-9.08336e-11	2.42171e-13	0	0	0	0	-4.17741e-11
r201	H2O[c] + CHIT[c] -> CHIB[c]	3.2.1.14	0	0	0	0	0	0	0	0	0	0
r202	H2O[b] + CHIT[b] -> CHIB[b]	3.2.1.14	0	0	0	0	0	0	0	0	0	0
r203	H2O[e] + CHIT[e] -> CHIB[e]	3.2.1.14	0	0	0	-9.08336e-11	2.42171e-13	0	0	0	0	-4.17741e-11
r204	H2O[c] + CHIT[c] -> NAG[c]	3.2.1.14	0	0	0	0	0	0	0	0	0	0
r205	H2O[b] + CHIT[b] -> NAG[b]	3.2.1.14	0	0	0	0	0	0	0	0	0	0
r206	H2O[e] + CHIT[e] -> NAG[e]	3.2.1.14	0	0	0	-9.08336e-11	2.42171e-13	0	0	0	0	-4.17741e-11
r207	H2O[c] + NAGA6P[c] -> AC[c] + GA6P[c]	3.5.1.25	999.744	999.544	999.344	999.144	998.944	998.744	998.544	998.344	998.144	5.51877
r208	H2O[c] + GA6P[c] -> F6P[c] + NH3[c]	3.5.99.6	1.04566e-09	8.95084e-10	-1.779e-09	7.44914e-10	1.65739e-10	1.93335e-09	-1.40783e-09	-1.43643e-10	8.85494e-11	2.30587e-09
r209	ATP[c] + GLCN[c] -> ADP[c] + GA6P[c]	2.7.1.1	0	0	0	0	0	0	0	0	0	0
r210	ATP[b] + GLCN[b] -> ADP[b] + GA6P[b]	2.7.1.1	0	0	0	0	0	0	0	0	0	0
r211	UDPNAG[c] -> UDP[c] + CHIT[c]	2.4.1.16	0.00045117	0.00045117	0.00045117	0.00045117	0.00045117	0.00045117	0.00045117	0.00045117	0.00045117	0
r212	UDPNAG[b] -> UDP[b] + CHIT[b]	2.4.1.16	0	0	0	0	0	0	0	0	0	0
r213	UDPNAG[e] -> UDP[e] + CHIT[e]	2.4.1.16	0	0	0	7.47126e-11	2.42297e-13	1.22133e-10	0	0	0	-2.18087e-11
r214	UDPNAG[m] -> UDP[m] + CHIT[m]	2.4.1.16	0	1.79835e-10	0	0	0	0	0	-3.08482e-11	2.34071e-11	2.47618e-10
r215	H2O[c] + CHIT[c] -> AC[c] + CHITO[c]	3.5.1.41	1.671e-05	1.671e-05	1.671e-05	1.671e-05	1.671e-05	1.671e-05	1.671e-05	1.671e-05	1.671e-05	-1.43207e-35
r216	H2O[e] + CHIT[e] -> AC[e] + CHITO[e]	3.5.1.41	0	0	0	7.47126e-11	2.42297e-13	1.22133e-10	0	0	0	-2.18087e-11
r217	CHITO[e] -> GLCMNIDE[e]	3.2.1.132	0	0	0	7.47126e-11	2.42297e-13	1.22133e-10	0	0	0	-2.18087e-11
r218	13GLUCAN[c] -> DGLC[c]	3.2.1.39	5.59677e-10	0	0	0	0	-5.74422e-10	-6.5724e-10	-5.38739e-10	3.31848e-11	2.58052e-09
r219	13GLUCAN[e] -> GLC[e]	3.2.1.58	4.24435e-10	1.00759e-10	0	0	0	0	-5.26494e-11	0	0	9.68229e-10
r220	ACCOA[c] + GA1P[c] -> COA[c] + NAGA1P[c]	2.3.1.157	0	0	0	0	0	0	0	0	0	0
r221	MANNAN[c] -> MAN[c]	3.2.1.113	0.195074	0.395074	0.595074	0.795074	0.995074	1.19507	1.39507	1.59507	1.79507	-5.51877
r222	MANNAN[b] -> MAN[b]	3.2.1.113	0	0	0	0	0	0	0	0	0	0
r223	4 ASCOBATE[c] + O2[c] -> 2 H2O[c] + 4 MASCORBATE[c]	1.10.3.3	0	0	0	0	0	0	0	0	0	0
r224	4 ASCOBATE[m] + O2[m] -> 2 H2O[m] + 4 MASCORBATE[m]	1.10.3.3	0	0	0	0	0	0	0	0	0	0
r225	4 ASCOBATE[e] + O2[e] -> 2 H2O[e] + 4 MASCORBATE[e]	1.10.3.3	0	0	0	0	0	0	0	0	0	0
r226	O2[m] + GULACNE[m] -> XYLACNE[m] + H2O2[m]	1.1.3.8	0	0	0	0	0	0	0	0	0	0
r227	XYLACNE[m] -> ASCOBATE[m]	1.1.3.8	0	0	0	0	0	0	0	0	0	0
r228	2 RGT[c] + MASCORBATE[c] <=> RGTDS[c] + ASCOBATE[c]	1.8.5.1	0	0	0	0	0	0	0	0	0	0
r229	CDPDG[b] + MYOI[b] -> CMP[b] + PINS[b]	2.7.8.11	0	0	0	0	0	0	0	0	0	0
r230	G6P[c] -> MI1P[c]	5.5.1.4	0	0	0	0	0	0	0	0	0	0
r231	MI1P[c] -> PI[c] + MYOI[c]	3.1.3.25	0	0	0	0	0	0	0	0	0	0
r232	NAD[c] + MYOI[c] -> NADH[c] + KEMYOI[c]	1.1.1.18	0	0	0	0	0	0	0	0	0	0
r233	ATP[c] + PINS[c] -> ADP[c] + PINSP[c]	2.7.1.137	0	0	0	0	0	0	0	0	0	0
r234	ATP[c] + PINS[c] -> ADP[c] + PINS4P[c]	2.7.1.67	0	0	0	0	0	0	0	0	0	0
r235	ATP[b] + PINS[b] -> ADP[b] + PINS4P[b]	2.7.1.67	0	0	0	0	0	0	0	0	0	0
r236	ATP[c] + PINS4P[c] -> ADP[c] + D45PI[c]	2.7.1.68	1.10515e-09	1.31604e-09	3.32506e-10	1.29207e-09	2.00805e-09	3.64146e-10	-1.96553e-09	-1.43547e-10	1.41785e-09	3.97902e-09
r237	ATP[m] + PINS4P[m] -> ADP[m] + D45PI[m]	2.7.1.68	0	0	0	0	0	0	0	0	0	0
r238	H2O[b] + TPI[b] -> MYOBISPI[b] + PI[b]	3.1.3.56	0	0	0	0	0	0	0	0	0	0
r239	H2O[b] + D45PI[b] -> PINS4P[b] + PI[b]	3.1.3.36	0	0	0	0	0	0	0	0	0	0
r240	H2O[c] + D45PI[c] -> PINS4P[c] + PI[c]	3.1.3.36	1.10515e-09	1.31604e-09	3.32506e-10	1.29207e-09	2.00805e-09	3.64146e-10	-1.96553e-09	-1.43547e-10	1.41785e-09	3.97902e-09
r241	MYOI[e] + O2[e] -> H2O[e] + GLUCN[e]	1.13.99.1	0	0	0	0	0	0	0	0	0	0
r242	UDPNAG[b] + DOLP[b] -> UMP[b] + NAGDPD[b]	2.7.8.15	0	0	0	0	0	0	0	0	0	0
r243	NAGDPD[c] + UDPNAG[c] -> UDP[c] + CHIBDPD[c]	2.4.1.141	0	0	0	0	0	0	0	0	0	0
r244	GDPMAN[c] + CHIBDPD[c] -> GDP[c] + MANCHIBDPD[c]	2.4.1.142	0	0	0	0	0	0	0	0	0	0
r245	GDPMAN[c] + MANCHIBDPD[c] -> GDP[c] + MANDPP[c]	2.4.1.132	0	0	0	0	0	0	0	0	0	0
r246	GDPMAN[c] + MANDPP[c] -> GDP[c] + MANDPPD[c]	2.4.1.257	0	0	0	0	0	0	0	0	0	0
r247	2 GDPMAN[b] + MANDPPD[b] -> 2 GDP[b] + MANNACD[b]	2.4.1.131	0	0	0	0	0	0	0	0	0	0
r248	GDPMAN[c] + DOLP[c] -> DOLMANP[c] + GDP[c]	2.4.1.83	0	0	0	0	0	0	0	0	0	0
r249	DOLMANP[b] + MANNACD[b] -> MANNACDD[b] + DOLP[b]	2.4.1.258	0	0	0	0	0	0	0	0	0	0
r250	DOLGPI[b] + MANNACDDD[b] -> GLCAADPP[b] + DOLP[b]	2.4.1.267	0	0	0	0	0	0	0	0	0	0
r251	DOLGPI[b] + GLCAADPP[b] -> GLCADP[b] + DOLP[b]	2.4.1.265	0	0	0	0	0	0	0	0	0	0
r252	DOLGPI[b] + GLCADP[b] -> GLCADPP[b] + DOLP[b]	2.4.1.256	0	0	0	0	0	0	0	0	0	0
r253	DOLDLS[b] + PROTASN[b] <=> DOLP[b] + GLCPASN[b]	2.4.99.18	0	0	0	0	0	0	0	0	0	0
r254	DOLP[b] + UDPG[b] -> UDP[b] + DOLGPI[b]	2.4.1.117	0	0	0	0	0	0	0	0	0	0
r255	DOLDP[c] + H2O[c] -> DOLP[c] + PI[c]	3.6.1.43	0	0	0	0	0	0	0	0	0	0
r256	UDPNAG[b] + PINS[b] -> UDP[b] + NAGPMIL[b]	2.4.1.198	0	0	0	0	0	0	0	0	0	0
r257	PPI[c] -> 2 PI[c]	3.6.1.1	4.08206	5.10397	6.12587	7.14778	8.16969	9.19159	10.2135	11.2354	12.2573	-28.1983
r258	ATP[c] + H2O[c] -> ADP[c] + PI[c]	3.6.4.1; 3.6.1.3	1.09898e-09	8.86669e-10	1.95203e-09	5.16845e-09	2.0777e-09	3.62898e-10	-4.12783e-10	-1.43452e-10	-6.70493e-09	2.01624e-08
r259	H2O[m] + ATP[m] -> PI[m] + ADP[m]	3.6.4.1; 3.6.1.3	1.39966e-09	1.12103e-09	-2.27389e-09	7.72341e-09	2.61454e-09	4.29502e-10	-8.06793e-10	-2.21561e-10	-8.43767e-09	2.1954e-08
r260	NADH[m] + Q[m] + 4 H_PO[m] -> NAD[m] + QH2[m] + 4 H_PO[c]	1.6.5.3	13.9104	15.4137	16.917	18.4203	19.9236	21.427	22.9303	24.4336	25.9369	-41.4822
r261	NADH[m] + Q[m] + 4 H_PO[m] -> NAD[m] + QH2[m] + 4 H_PO[m]	1.6.5.3	2.49013e-09	1.0352e-09	4.38077e-09	2.74989e-09	8.13278e-09	8.18758e-10	-2.66995e-09	-1.90674e-10	5.76321e-11	1.35395e-08
r262	NADH[c]+ Q[c] + 4 H_PO[c] -> NAD[c]+ QH2[c] + 4 H_PO[c]	1.6.5.3	0	0	0	0	0	0	0	0	0	0
r263	NADH[m] + FAD[m] -> NAD[m] + FADH2[m]	1.6.99.3	2.49013e-09	1.02998e-09	-2.60815e-09	2.74922e-09	2.48267e-09	8.18758e-10	-2.66995e-09	-1.90926e-10	5.76321e-11	7.10394e-09
r264	NADH[c] + FAD[c] -> NAD[c] + FADH2[c]	1.6.99.3	0	0	0	0	0	0	0	0	0	0
r265	ATP[c] + H2O[c] + 3.87 H_PO[c] -> ADP[c] + PI[c] + 3.87 H_PO[e]	3.6.3.6	9.92923e-10	8.86665e-10	6.34136e-09	5.16845e-09	2.89318e-09	3.62898e-10	-1.45952e-09	-1.43452e-10	3.6902e-11	1.25652e-08
r266	ATP[m] + H2O[m] + 3.87 H_PO[m] -> ADP[m] + PI[m] + 3.87 H_PO[c]	3.6.3.6	963.726	959.469	955.213	950.956	946.7	942.443	938.187	933.93	929.674	117.454
r267	ATP[b] + H2O[b] + 3.87 H_PO[b] -> ADP[b] + PI[b] + 3.87 H_PO[b]	3.6.3.6	0	0	0	0	0	0	0	0	0	0
r268	QH2[m] + 2 FERI[m] + 4 H_PO[m] -> Q[m] + 2 FERO[m] + 4 H_PO[c]	1.10.2.2	15.2807	17.1682	19.0558	20.9433	22.8309	24.7184	26.6059	28.4935	30.381	-52.0846
r269	QH2[c] + 2 FERI[c] + 4 H_PO[c] -> Q[c] + 2 FERO[c] + 4 H_PO[e]	1.10.2.2	6.3717e-10	3.43675e-10	7.78037e-10	2.41087e-09	6.79563e-11	1.26505e-10	-4.32465e-10	-2.99053e-10	1.64206e-11	4.19268e-09
r270	QH2[b] + 2 FERI[b] + 4 H_PO[b] -> Q[b] + 2 FERO[b] + 4 H_PO[b]	1.10.2.2	0	0	0	0	0	0	0	0	0	0
r271	QH2[m] + 2 FERI[m]+ 4 H_PO[m] -> Q[m] + 2 FERO[m] + 4 H_PO[m]	1.10.2.2	0	0	0	0	0	0	0	0	0	0
r272	NADPH[c] + 2 FERI[m] -> NADP[c] + 2 FERO[m]	1.6.2.4	1.20254e-09	5.16892e-10	1.18237e-09	1.57448e-09	6.81399e-11	1.32708e-10	-1.25376e-09	1.54039e-10	2.67235e-11	5.56745e-09
r273	NADPH[c] + 2 FERI[c] -> NADP[c] + 2 FERO[c]	1.6.2.4	7.87972e-10	3.43981e-10	7.78833e-10	9.80403e-10	6.72955e-11	1.26796e-10	-4.67797e-10	-2.95579e-10	2.5242e-11	3.82472e-09
r274	NADPH[e] + 2 FERI[e] -> NADP[e] + 2 FERO[e]	1.6.2.4	0	0	0	0	0	0	0	0	0	0
r275	Q[c] + FADH2[m] -> QH2[c] + FAD[m]	1.5.5.1	6.3717e-10	3.43675e-10	7.78037e-10	2.41087e-09	6.79563e-11	1.26505e-10	-4.32465e-10	-2.99053e-10	1.64206e-11	4.19268e-09
r276	2 FERO[m] + 0.5 O2[m] + 4 H_PO[m] -> 2 FERI[m] + H2O[m] + 4 H_PO[c]	1.9.3.1	15.2807	17.1682	19.0558	20.9433	22.8309	24.7184	26.6059	28.4935	30.381	-52.0846
r277	2 FERO[c] + 0.5 O2[c] + 4 H_PO[c] -> 2 FERI[c] + H2O[c] + 4 H_PO[e]	1.9.3.1	4.65436e-10	3.62114e-10	1.67138e-09	3.01835e-10	6.83684e-11	-2.4781e-10	7.48514e-10	-2.99053e-10	1.14682e-11	2.84895e-09
r278	2 FERO[b] + 0.5 O2[b] + 4 H_PO[b] -> 2 FERI[b] + H2O[b] + 4 H_PO[c]	1.9.3.1	0	0	0	0	0	0	0	0	0	0
r279	2 FERO[b] + 0.5 O2[b] + 4 H_PO[b] -> 2 FERI[b] + H2O[b] + 4 H_PO[b]	1.9.3.1	0	0	0	0	0	0	0	0	0	0
r280	2 FERO[e] + 0.5 O2[e] + 4 H_PO[e] -> 2 FERI[e] + H2O[e] + 4 H_PO[e]	1.9.3.1	0	0	0	0	0	0	0	0	0	0
r281	PAPS[c] + RTHIO[c] -> OTHIO[c] + H2SO3[c] + PAP[c]	1.8.4.8	0	0	0	-6.01599e-11	1.35426e-11	0	-1.81739e-10	-1.16302e-10	0	2.99956e-10
r282	3 NADPH[c] + H2SO3[c] -> 3 H2O[c] + 3 NADP[c] + H2S[c]	1.8.1.2	0.0173984	0.0173984	0.0173984	0.0173984	0.0173984	0.0173984	0.0173984	0.0173984	0.0173984	0
r283	3 NADPH[m] + H2SO3[m] -> 3 H2O[m] + 3 NADP[m] + H2S[m]	1.8.1.2	0	0	0	0	0	0	0	0	0	0
r284	H2O[e] + O2[e] + H2SO3[e] -> SLF[e] + H2O2[e]	1.8.3.1	0	0	0	0	0	0	-1.81739e-10	-1.16302e-10	0	3.27623e-10
r285	PI[m] + ADP[m] + 3.87 H_PO[c] -> H2O[m] + ATP[m] + 3.87 H_PO[m]	3.6.3.14	1000	1000	1000	1000	1000	1000	1000	1000	1000	0
r286	PI[c] + ADP[c] + 3.87 H_PO[c] -> H2O[c] + ATP[c] + 3.87 H_PO[c]	3.6.3.14	0	0	0	0	0	0	0	0	0	0
r287	PI[b] + ADP[b] + 3.87 H_PO[b] -> H2O[b] + ATP[b] + 3.87 H_PO[b]	3.6.3.14	0	0	0	0	0	0	0	0	0	0
r288	PI[m] + ADP[m] + 3.87 H_PO[m] -> H2O[m] + ATP[m] + 3.87 H_PO[m]	3.6.3.14	0	0	0	0	0	0	0	0	0	0
r289	ATP[m] + H2O[m] + PHOSLP[m] -> ADP[m] + PI[m] + PHOSLP[c]	3.6.3.1	1.42541e-09	1.48566e-09	8.13657e-10	0	0	-9.53605e-10	0	-9.24729e-10	8.89031e-11	6.97117e-09
r290	ADP[c] + PI[c] + H2O[m] + ATP[m] + H_PO[c] -> ATP[c] + H2O[c] + PI[m] + ADP[m] + H_PO[m]		37.5064	42.1472	46.7879	51.4287	56.0695	60.7103	65.351	69.9918	74.6326	-128.057
r291	NADH[c] + 2 FERRIB5[c] -> NAD[c] + 2 FERROB5[c]	1.6.2.2	0	0	0	0	0	0	0	0	0	0
r292	ATP[m] + H2O[m] + 3.87 H_PO[m] + Ca[m] -> ADP[m] + PI[m] + 3.87 H_PO + Ca[m]	3.6.3.8	963.726	959.469	955.213	950.956	946.7	942.443	938.187	933.93	929.674	117.454
r293	NADH[c] + ATP[c] -> ADP[c] + NADPH[c]	2.7.1.86	5.30243e-13	0	0	0	0	0	0	0	0	9.75428e-13
r294	3 NADPH[c] + HNO2[c] -> H2O[c] + 3 NADP[c] + NH4OH[c]	1.7.1.4	0	0	0	0	0	0	0	0	0	0
r295	NADH[c] + HNO3[c] -> NAD[c] + H2O[c] + HNO2[c]	1.7.1.1	0	0	0	0	0	0	0	0	0	0
r296	O2[m] + 2 NITROPRO[m] -> 2 HNO2[m] + 2 ACET[m]	1.13.11.32	0	0	0	0	0	0	0	0	0	0
r297	H2O[c] + NH3[c] <=> NH4OH[c]		0	0	0	0	0	0	0	0	0	0
r298	H2O[c] + CYNE[c] -> CABM[c]	4.2.1.104	0	0	0	0	0	0	0	0	0	0
r299	CABM[c] -> CO2[c] + NH3[c]		0	0	0	0	0	0	0	0	0	0
r300	ATN[c] <=> ATT[c]	3.5.2.5	0	0	0	0	0	0	0	0	0	0
r301	ATT[c] <=> UGC[c] + UREA[c]	3.5.3.4	0	0	0	0	0	0	0	0	0	0
r302	ATT[e] <=> UGC[e] + UREA[e]	3.5.3.4	0	0	0	0	0	0	0	0	0	0
r303	H2O[c] + UREA[c] -> CO2[c] + 2 NH3[c]	3.5.1.5	1.65845e-10	1.5677e-10	2.19371e-10	4.62285e-10	7.31507e-10	-3.67849e-10	2.20098e-10	-2.65241e-11	1.96766e-11	9.02887e-10
r304	NITE[c] -> NH3[c] + CARBO[c]	3.5.5.1	0	0	0	0	0	0	0	0	0	0
r305	CO2[c] + H2O[c] -> HCO3[c] + H_PO[c]	4.2.1.1	13.0062	12.4757	11.9451	11.4146	10.884	10.3534	9.82288	9.29232	8.76177	14.6401
r306	OA[m] + GLU[m] <=> AKG[m] + ASP[m]	2.6.1.1	1000	1000	1000	1000	1000	1000	1000	1000	1000	0
r307	OA[c] + GLU[c] <=> AKG[c] + ASP[c]	2.6.1.1	1000	1000	1000	1000	1000	1000	1000	1000	1000	0
r308	PYR[c] + GLU[c] <=> AKG[c] + ALA[c]	2.6.1.2	999.554	999.154	998.754	998.354	997.954	997.554	997.154	996.754	996.354	11.0375
r309	PYR[m] + GLU[m] <=> AKG[m] + ALA[m]	2.6.1.2	1000	1000	1000	1000	1000	1000	1000	1000	1000	0
r310	H2O[c] + O2[c] + DASP[c] -> OA[c] + H2O2[c] + NH3[c]	1.4.3.1	0	0	0	0	0	0	0	0	0	0
r311	H2O[e] + O2[e] + DASP[e] -> H2O2[e] + OA[e] + NH3[e]	1.4.3.1	0	0	1.93845e-13	4.0298e-11	0	0	0	0	0	1.87113e-11
r312	H2O[e] + O2[e] + DASP[e] -> H2O2[e] + OA[e] + NH3[e]	1.4.3.3	0	0	1.93845e-13	4.0298e-11	0	0	0	0	0	1.87113e-11
r313	H2O[c] + O2[c] + GLY[c] -> GLX[c] + H2O2[c] + NH3[c]	1.4.3.3	1.57958e-09	1.39288e-10	-1.42839e-10	2.41172e-10	-3.49342e-10	-5.90399e-11	4.57464e-10	-7.32895e-10	-7.69928e-10	5.11138e-09
r314	CYS[m] + ECYS[m] -> ALA[m] + ESULFCYS[m]	2.8.1.7	0	0	0	0	0	0	0	0	0	0
r315	ATP[c] + ASP[c] + GLN[c] -> AMP[c] + PPI[c] + GLU[c] + ASN[c]	6.3.5.4	0.0227979	0.0227979	0.0227979	0.0227979	0.0227979	0.0227979	0.0227979	0.0227979	0.0227979	5.13949e-10
r316	NADPH[c] + BASP[c] -> PI[c] + NADP[c] + ASPSA[c]	1.2.1.11	0.305488	0.505488	0.705488	0.905488	1.10549	1.30549	1.50549	1.70549	1.90549	-5.51877
r317	ATP[c] + ASP[c] -> ADP[c] + BASP[c]	2.7.2.4	0.305488	0.505488	0.705488	0.905488	1.10549	1.30549	1.50549	1.70549	1.90549	-5.51877
r318	ATP[c] + ALA[c] + TRNA[c] -> AMP[c] + PPI[c] + LAlaTRNA[c]	6.1.1.7	8.04484e-10	6.12985e-11	-5.34328e-11	9.30385e-11	-3.62347e-10	-1.64776e-10	0	-1.78076e-10	-4.25006e-11	1.95779e-09
r319	ATP[c] + ASP[c] + TRNA[c] -> AMP[c] + PPI[c] + ASPTRNA[c]	6.1.1.12	0	2.74523e-11	0	6.10249e-11	0	0	0	-1.83227e-10	-1.87821e-10	6.64251e-10
r320	ATP[c] + ASN[c] + TRNA[c] -> AMP[c] + PPI[c] + ASNTRNA[c]	6.1.1.22	0	2.59374e-11	-4.3534e-11	7.79702e-11	0	0	0	-1.54021e-10	-5.69531e-11	3.48874e-10
r321	ATP[m] + ASN[m] + TRNA[m] -> AMP[m] + PPI[m] + ASNTRNA[m]	6.1.1.22	0	0	0	8.76899e-11	0	-2.87517e-11	1.56092e-10	-1.81507e-10	0	1.60402e-10
r322	H2O[c] + OXOGLU[c] -> AKG[c] + NH3[c]	3.5.1.3	0	0	0	0	0	0	0	0	0	0
r323	ASP [c]+ H2O[c] + O2[c] -> OA[c] + NH3[c] + H2O2[c]	1.4.3.2	0	0	0	0	0	0	0	0	0	0
r324	OXPPNE[m] + COA[m] + NADP[m] -> ACCOA[m] + CO2[m] + NADPH[m]	1.2.1.18	0	0	0	0	0	0	0	0	0	0
r325	SAM[c] <=> CO2[c] + DSAM[c]	4.1.1.50	0	5.74047e-11	0	0	0	-2.75951e-11	6.05037e-11	0	0	3.62408e-11
r326	DSAM[c] + PTRSC[c] -> 5MTA[c] + SPRMD[c]	2.5.1.16	0	4.07039e-11	0	0	0	-1.37976e-11	3.02519e-11	0	0	3.46788e-11
r327	DSAM[c] + SPRMD[c] -> 5MTA[c] + SPRM[c]	2.5.1.22	0	5.74047e-11	0	0	0	-1.37976e-11	3.02519e-11	0	-3.85043e-11	1.28553e-10
r328	GLU[m] + NAGLUS[m] -> AKG[m] + NAORN[m]	2.6.1.11	0	0	-2.92328e-11	0	0	0	0	0	0	-2.68881e-11
r329	GLU[c] + NAGLUS[c] -> AKG[c] + NAORN[c]	2.6.1.11	0	0	0	0	0	0	0	0	0	0
r330	H2O[c] + NAORN[c] -> ORN[c] + AC[c]	3.5.1.14	0	0	0	0	0	0	0	0	0	0
r331	ORN[c] + CAP[c] -> PI[c] + CITR[c]	2.1.3.3	0.0219672	0.0219672	0.0219672	0.0219672	0.0219672	0.0219672	0.0219672	0.0219672	0.0219672	1.01597e-09
r332	ATP[c] + ASP[c] + CITR[c] <=> AMP[c] + PPI[c] + ARGSUCC[c]	6.3.4.5	0.0219672	0.0219672	0.0219672	0.0219672	0.0219672	0.0219672	0.0219672	0.0219672	0.0219672	1.01597e-09
r333	ARGSUCC[c] <=> FUM[c] + ARG[c]	4.3.2.1	0.0219672	0.0219672	0.0219672	0.0219672	0.0219672	0.0219672	0.0219672	0.0219672	0.0219672	1.01597e-09
r334	ARG[c] -> UREA[c] + ORN[c]	3.5.3.1	2.22027e-10	4.21179e-11	-1.93506e-11	-3.50369e-11	-4.91709e-11	-4.54837e-11	-6.40156e-12	1.40425e-11	-1.82713e-10	7.76184e-10
r335	H2O[c] + AGMT[c] -> UREA[c] + PTRSC[c]	3.5.3.11	0	1.46402e-11	0	-2.60365e-11	1.82991e-11	0	4.11546e-11	0	0	-2.9629e-11
r336	ATP[m] + GLU[m] -> ADP[m] + GLUP[m]	2.7.2.11	0.044719	0.044719	0.044719	0.044719	0.044719	0.044719	0.044719	0.044719	0.044719	7.22318e-09
r337	ATP[b] + GLU[b] -> ADP[b] + GLUP[b]	2.7.2.11	0	0	0	0	0	0	0	0	0	0
r338	NADPH[c] + GLUP[c] -> PI[c] + NADP[c] + GLUGSAL[c]	1.2.1.41	0.044719	0.044719	0.044719	0.044719	0.044719	0.044719	0.044719	0.044719	0.044719	7.22318e-09
r339	FAD[m] + PRO[c] -> FADH2[m] + P5C[c]	1.5.99.8	-5.24943e-11	4.94891e-10	-3.91537e-10	7.3803e-10	-4.40329e-09	-4.39539e-09	1.56441e-09	2.94328e-10	-5.01598e-09	9.96926e-09
r340	GLUGSAL[m] <=> H2O[m] + P5C[m]		1000	1000	1000	1000	1000	1000	1000	1000	1000	0
r341	NADP[c] + GLUGSAL[c] -> NADPH[c] + GLU[c]	1.5.1.12	1.34389e-09	4.64749e-10	-4.75923e-10	1.67767e-09	-2.73872e-10	5.62341e-09	6.96899e-10	-7.7518e-10	2.38424e-09	-3.09648e-09
r342	NADPH[c] + P5C[c] <=> NADP[c] + PRO[c]	1.5.1.2	1000	1000	1000	1000	1000	1000	1000	1000	1000	-3.08728e-09
r343	NAORN[c] + GLU[c] -> ORN[c] + NAGLU[c]	2.3.1.35	0	0	0	0	0	0	0	0	0	0
r344	NAORN[m] + GLU[m] -> ORN[m] + NAGLU[m]	2.3.1.35	6.10915e-11	0	-1.32104e-10	3.59922e-11	3.79714e-10	-1.66612e-11	3.65655e-11	-3.90159e-11	6.2073e-11	-7.89018e-11
r345	ACCOA[c] + GLU[c] -> COA[c] + NAGLU[c]	2.3.1.1	0	0	0	0	0	0	0	0	0	0
r346	ACCOA[m] + GLU[m] -> COA[m] + NAGLU[m]	2.3.1.1	0	0	0	0	0	0	0	0	0	0
r347	AKG[c] + ORN[c] -> GLU[c] + GLUGSAL[c]	2.6.1.13	999.955	999.955	999.955	999.955	999.955	999.955	999.955	999.955	999.955	-8.14066e-11
r348	ORN[c] -> CO2[c] + PTRSC[c]	4.1.1.17	0	0	0	0	0	0	0	0	0	0
r349	ACCOA[c] + PTRSC[c] -> COA[c] + APRUT[c]	2.3.1.57	0	0	0	0	0	0	0	0	0	0
r350	H2O[c] + O2[c] + APRUT[c] -> H2O2[c] + NH3[c] + AABUTNOL[c]	1.4.3.4	0	0	0	0	0	0	0	0	0	0
r351	ATP[c] + TRNA[c] + ARG[c] -> AMP[c] + PPI[c] + ALTRNA[c]	6.1.1.19	0	0	0	0	0	0	0	0	0	0
r352	ATP[m] + TRNA[m] + ARG[m] -> AMP[m] + PPI[m] + ALTRNA[m]	6.1.1.19	0	0	0	0	0	0	0	0	0	0
r353	ATP[c] + TRNA[c] + PRO[c] -> AMP[c] + PPI[c] + LPROTRNA[c]	6.1.1.15	0	0	0	0	0	0	0	0	0	0
r354	ATP[m] + TRNA[m] + PRO[m] -> AMP[m] + PPI[m] + LPROTRNA[m]	6.1.1.15	0	0	0	0	0	0	0	0	0	0
r355	ORN[c] <=> NH3[c] + PRO[c]	4.3.1.12	-0.0219672	-0.0219672	-0.0219672	-0.0219672	-0.0219672	-0.0219672	-0.0219672	-0.0219672	-0.0219672	-9.93919e-11
r356	ORN[m] <=> NH3[m] + PRO[m]	4.3.1.12	0	0	0	0	0	0	0	0	0	0
r357	ATP[m] + NAGLU[m] -> ADP[m] + NAGLUP[m]	2.7.2.8	0	0	0	0	0	0	0	0	0	0
r358	NAGLUP[m] + NADP[m] + PI[m] -> NADPH[m] + ACGLU5PI[m]	1.2.1.38	0	0	0	0	0	0	0	0	0	0
r359	AKG[m] + O2[m] + PRO[m] -> CO2[m] + SUCC[m] + HYPRO[m]	1.14.11.2	0	0	0	0	0	0	0	0	0	0
r360	GLN[c] -> GLU[c] + NH3[c]	3.5.1.2	1.58781e-09	1.71231e-09	7.34871e-10	2.0921e-09	-1.44866e-09	-2.65472e-10	-2.52275e-09	4.65044e-09	-1.95667e-10	3.30773e-09
r361	ATP[c] + TRNA[c] + CYS[c] -> AMP[c] + PPI[c] + LCysTRNA[c]	6.1.1.16	0	1.65947e-10	0	7.11629e-11	-4.39266e-11	6.51313e-12	0	0	4.63835e-11	1.73362e-10
r362	H2O[c] + PAP[c] -> PI[c] + AMP[c]	3.1.3.7	0	0	0	2.46815e-11	-1.46726e-13	0	0	-8.21778e-11	0	1.24731e-10
r363	O2[c] + CYS[c] -> 3SULALA[c]	1.13.11.20	2.14692e-10	0	0	1.75414e-10	0	0	0	0	0	4.75617e-10
r364	SER[m] -> PYR[m] + NH3[m]	4.3.1.17	999.449	999.049	998.649	998.249	997.849	997.449	997.049	996.649	996.249	11.0375
r365	SER[c] -> PYR[c] + NH3[c]	4.3.1.17	999.449	999.049	998.649	998.249	997.849	997.449	997.049	996.649	996.249	11.0375
r366	ACCOA[c] + HSER[c] -> COA[c] + OAHSER[c]	2.3.1.31	0.0114913	0.0114913	0.0114913	0.0114913	0.0114913	0.0114913	0.0114913	0.0114913	0.0114913	0
r367	ACCOA[c] + SER[c] -> COA[c] + ASER[c]	2.3.1.30	0.00590716	0.00590716	0.00590716	0.00590716	0.00590716	0.00590716	0.00590716	0.00590717	0.00590716	-1.12044e-08
r368	H2S[m] + ASER[m] -> AC[m] + CYS[m]	2.5.1.47	0	0	0	0	0	0	0	0	0	0
r369	H2S[c] + ASER[c] -> AC[c] + CYS[c]	2.5.1.47	0.00590716	0.00590716	0.00590716	0.00590716	0.00590716	0.00590716	0.00590716	0.00590717	0.00590716	-1.12044e-08
r370	CYS[c] + AKG[c] <=> MECPYR[c] + GLU[c]	2.6.1.3	0	0	0	0	0	0	0	0	0	0
r371	CYS[m] + AKG[m] <=> MECPYR[m] + GLU[m]	2.6.1.3	0	0	0	0	0	0	0	0	0	0
r372	SAM[c] + DNACYS[c] -> SAH[c] + DNAMCYS[c]	2.1.1.37	0	0	0	0	0	0	0	0	0	0
r373	GLU[m] -> CO2[m] + GABA[m]	4.1.1.15	0	0	0	0	0	0	0	0	0	0
r374	GLU[c] -> CO2[c] + GABA[c]	4.1.1.15	1.38769e-09	-6.64329e-10	-4.72529e-10	8.11981e-10	-2.62676e-10	1.62136e-08	3.00776e-08	-8.61799e-10	-1.85253e-09	-2.89499e-08
r375	O2[c] + DHYXPENT[c] -> FOR[c] + MTHIOBUT[c]	1.13.11.54	0	0	0	0	0	0	0	0	0	0
r376	NAD[c] + H2O[c] + SUCCSAL[c] -> NADH[c] + SUCC[c]	1.2.1.16	1.38769e-09	-6.64329e-10	-4.72529e-10	8.11981e-10	-2.62676e-10	1.62136e-08	3.00776e-08	-8.61799e-10	-1.85253e-09	-2.89499e-08
r377	NADP[c] + H2O[c]+ SUCCSAL[c] -> NADPH[c] + SUCC[c]	1.2.1.16	0	0	0	0	0	0	0	0	0	0
r378	NADPH[c] + AKG[c] + GLN[c] -> NADP[c] + 2 GLU[c]	1.4.1.13	1.10869e-09	-5.18562e-10	-3.82741e-10	6.58656e-10	-2.09555e-10	1.28636e-08	1.43992e-09	-6.31876e-10	-8.04123e-10	-3.61435e-09
r379	NADH[c] + AKG[c] + GLN[c] -> NAD[c] + 2 GLU[c]	1.4.1.14	1.05328e-09	-5.21197e-10	5.42605e-10	6.58656e-10	-2.09529e-10	1.28713e-08	1.43992e-09	-6.31871e-10	-8.0477e-10	-2.87114e-09
r380	NAD[c] + GLU[c] <=> NADH[c] + AKG[c] + NH3[c]	1.4.1.2	1000	1000	1000	1000	1000	1000	1000	1000	1000	0
r381	H2O[m] + NADP[m] + GLU[m] <=> AKG[m] + NADPH[m] + NH3[m]	1.4.1.3	999.973	999.973	999.973	999.973	999.973	999.973	999.973	999.973	999.973	0
r382	H2O[c] + NADP[c] + GLU[c] <=> AKG[c] + NADPH[c] + NH3[c]	1.4.1.3	1000	1000	1000	1000	1000	1000	1000	1000	1000	0
r383	ACCOA[c] + GA6P[c] <=> COA[c] + NAGA6P[c]	2.3.1.4	999.745	999.545	999.345	999.145	998.945	998.745	998.545	998.345	998.145	5.51877
r384	AKG[m] + GABA[m] -> GLU[m] + SUCCSAL[m]	2.6.1.19	0	0	0	0	0	0	0	0	0	0
r385	AKG[c] + GABA[c] -> GLU[c] + SUCCSAL[c]	2.6.1.19	2.48442e-09	-1.06658e-09	1.661e-09	8.18056e-10	1.95179e-09	-1.39153e-09	2.7744e-08	-9.29731e-10	7.18748e-10	-1.99155e-08
r386	AKG[p] + GABA[p] -> GLU[p] + SUCCSAL[p]	2.6.1.19	0	0	0	0	0	0	0	0	0	0
r387	ATP[c] + NH3[c] + GLU[c] -> ADP[c] + PI[c] + GLN[c]	6.3.1.2	0.898519	1.49852	2.09852	2.69852	3.29852	3.89852	4.49852	5.09852	5.69852	-16.5563
r388	F6P[c] + GLN[c] -> GA6P[c] + GLU[c]	2.6.1.16	0.000451171	0.000451169	0.000451171	0.000451169	0.000451172	0.000451174	0.000451194	0.000451169	0.000451169	-1.86006e-08
r389	ATP[c] + GLU[c] + TRNA[c] -> AMP[c] + PPI[c] + LGLUTRNA[c]	6.1.1.17	1.13233e-10	-1.5897e-10	0	7.37259e-11	0	-1.30906e-10	0	2.53536e-10	3.29851e-11	-3.27398e-10
r390	ATP[m] + GLU[m] + TRNA[m] -> PPI[m] + AMP[m] + LGLUTRNA[m]	6.1.1.17	0	0	0	0	0	0	0	0	0	0
r391	ATP[c] + GLN[c] + TRNA[c] -> AMP[c] + PPI[c] + LGLNTRNA[c]	6.1.1.18	1.76385e-10	-2.51439e-10	0	1.19336e-10	0	0	0	2.14043e-10	5.16728e-11	-3.5792e-10
r392	NAD[c] + 3PG[c] -> NADH[c] + PHP[c]	1.1.1.95	1.96769e-09	-8.44545e-10	1.32337e-09	6.4898e-10	1.55017e-09	-2.23233e-09	2.39021e-08	-7.35575e-10	5.70992e-10	-1.70237e-08
r393	NAD[m] + 3PG[m] -> NADH[m] + PHP[m]	1.1.1.95	0	0	0	0	0	0	0	0	0	0
r394	ATP[m] + GLYCTE[m] <=> ADP[m] + 3PG[m]	2.7.1.31	0	0	0	0	0	0	0	0	0	0
r395	GLU[c] + PHP[c] -> AKG[c] + 3PSER[c]	2.6.1.52	1.96769e-09	-8.44545e-10	1.32337e-09	6.4898e-10	1.55017e-09	-2.23233e-09	2.39021e-08	-7.35575e-10	5.70992e-10	-1.70237e-08
r396	3PSER[c] -> PI[c] + SER[c]	3.1.3.3	1.96769e-09	-8.44545e-10	1.32337e-09	6.4898e-10	1.55017e-09	-2.23233e-09	2.39021e-08	-7.35575e-10	5.70992e-10	-1.70237e-08
r397	NADPH[c] + ASPSA[c] -> NADP[c] + HSER[c]	1.1.1.3	0.305488	0.505488	0.705488	0.905488	1.10549	1.30549	1.50549	1.70549	1.90549	-5.51877
r398	NADPH[m] + ASPSA[m] -> NADP[m] + HSER[m]	1.1.1.3	0	0	0	0	0	0	0	0	0	0
r399	ATP[c] + HSER[c] -> ADP[c] + PHSER[c]	2.7.1.39	0.293997	0.493997	0.693997	0.893997	1.094	1.294	1.494	1.694	1.894	-5.51877
r400	THR[c] -> ACAL[c] + GLY[c]	4.1.2.5	0.238525	0.438525	0.638525	0.838525	1.03852	1.23852	1.43852	1.63852	1.83852	-5.51877
r401	THR[m] -> ACAL[m] + GLY[m]	4.1.2.5	0.238525	0.438525	0.638525	0.838525	1.03852	1.23852	1.43852	1.63852	1.83852	-5.51877
r402	NAD[m] + GLY[m] + THF[m] -> NADH[m] + CO2[m] + NH3[m] + METTHF[m]	2.1.2.10	4.89882e-10	-2.08831e-10	1.84739e-10	1.62211e-10	3.85099e-10	1.0737e-10	7.29919e-09	-1.21588e-10	7.51055e-12	-5.75161e-09
r403	SER[m] + THF[m] <=> GLY[m] + METTHF[m]	2.1.2.1	1000	1000	1000	1000	1000	1000	1000	1000	1000	0
r404	SER[c] + THF[c] <=> GLY[c] + METTHF[c]	2.1.2.1	1000	1000	1000	1000	1000	1000	1000	1000	1000	0
r405	CHO[e] + PQ[e] -> BETALD[e] + PQH2[e]	1.1.99.1	0	0	0	0	0	0	0	0	0	0
r406	CHO[c] + PQ[c] -> BETALD[c] + PQH2[c]	1.1.99.1	3.00533e-10	0	0	0	0	0	4.09781e-09	0	0	-3.21628e-09
r407	H2O[c] + O2[c] + SARC[c] -> FALD[c] + H2O2[c] + GLY[c]	1.5.3.1	0	0	0	0	0	0	0	0	0	0
r408	SER[c] + HCYS[c] -> LLCT[c]	4.2.1.22	0	0	0	0	0	0	0	0	0	0
r409	SER[m] + HCYS[m] -> LLCT[m]	4.2.1.22	999.449	999.049	998.649	998.249	997.849	997.449	997.049	996.649	996.249	11.0375
r410	ATP[m] + TRNA[m] + SER[m] -> PPI[m] + AMP[m] + LSERTRNA[m]	6.1.1.11	0	0	0	-7.14476e-10	0	0	0	-2.98274e-10	0	8.29413e-11
r411	ATP[c] + TRNA[c] + SER[c] -> AMP[c] + PPI[c] + LSERTRNA[c]	6.1.1.11	6.12551e-11	6.65096e-11	4.7037e-10	-2.57648e-10	4.29168e-10	0	0	-9.33724e-11	2.9441e-12	6.42009e-10
r412	ATP[c] + TRNA[c] + GLY[c] -> AMP[c] + PPI[c] + GLYTRNA[c]	6.1.1.14	5.42515e-11	4.69481e-11	1.54339e-10	2.70335e-11	2.22485e-10	0	0	-6.55971e-11	2.71795e-12	4.04471e-10
r413	ATP[c] + TRNA[c] + THR[c] -> AMP[c] + PPI[c] + LTHETRNA[c]	6.1.1.3	5.52663e-11	5.0123e-11	2.06512e-10	-3.94134e-11	-1.12323e-10	0	0	-1.71019e-11	2.84707e-11	3.13865e-10
r414	H2O[c] + PHSER[c] -> PI[c] + THR[c]	4.2.3.1	0.293997	0.493997	0.693997	0.893997	1.094	1.294	1.494	1.694	1.894	-5.51877
r415	THR[c] -> NH3[c] + OBUT[c]	4.3.1.19	0	0	0	0	0	0	0	0	0	0
r416	THR[m] -> NH3[m] + OBUT[m]	4.3.1.19	0.0267207	0.0267207	0.0267207	0.0267207	0.0267207	0.0267207	0.0267207	0.0267207	0.0267207	2.25285e-10
r417	SUCCOA[m] + GLY[m] -> COA[m] + CO2[m] + AMIEVUL[m]	2.3.1.37	0	0	0	0	0	0	0	0	0	0
r418	SUCCOA[c] + GLY[c] -> COA[c] + CO2[c + AMIEVUL[c]	2.3.1.37	0	0	0	0	0	0	0	0	0	0
r419	GLY[m] + LIPO[m] <=> CO2[m] + SAP[m]	1.4.4.2	0	0	0	0	0	0	0	0	0	0
r420	GLY[c] + LIPO[c] <=> CO2[c] + SAP[c]	1.4.4.2	0	0	0	0	0	0	0	0	0	0
r421	SER[c] <=> DSER[c]	5.1.1.18	0	0	0	0	0	0	0	0	0	0
r422	THR[m] <=> GLY[m]+ ACAL[m]	4.1.2.48	0	0	0	0	0	0	0	0	0	0
r423	SER[c] <=> PYR[c] + NH3[c]	4.3.1.19	-0.550748	-0.950748	-1.35075	-1.75075	-2.15075	-2.55075	-2.95075	-3.35075	-3.75075	11.0375
r424	BETALD[c] + NAD[c] + H2O[c] -> GLYBET[c] + NADH[c]	1.2.1.8	3.04127e-10	0	0	0	0	0	-1.12142e-10	0	6.22395e-11	5.48121e-10
r425	THR[c] + NAD[c] -> AMOXOBU[c] + NADH[c]	1.1.1.103	0	0	0	0	0	0	0	0	0	0
r426	THR[m] + NAD[m] -> AMOXOBU[m] + NADH[m]	1.1.1.103	0	0	0	0	0	0	0	0	0	0
r427	PRFP[c] -> PRLP[c]	5.3.1.16	0.0117682	0.0117682	0.0117682	0.0117682	0.0117682	0.0117682	0.0117682	0.0117682	0.0117682	1.15016e-10
r428	GLU[c] + IMACP[c] -> AKG[c] + HISOLP[c]	2.6.1.9	0.0117682	0.0117682	0.0117682	0.0117682	0.0117682	0.0117682	0.0117682	0.0117682	0.0117682	1.15016e-10
r429	HISOLP[c] -> PI[c] + HISOL[c]	3.1.3.15	0.0117682	0.0117682	0.0117682	0.0117682	0.0117682	0.0117682	0.0117682	0.0117682	0.0117682	1.15016e-10
r430	2 NAD[c] + HISOL[c] -> 2 NADH[c] + HIS[c]	1.1.1.23	0.0117682	0.0117682	0.0117682	0.0117682	0.0117682	0.0117682	0.0117682	0.0117682	0.0117682	1.15016e-10
r431	ATP[c] + PRPP[c] -> PPI[c] + PRBATP[c]	2.4.2.17	0.0117682	0.0117682	0.0117682	0.0117682	0.0117682	0.0117682	0.0117682	0.0117682	0.0117682	1.15016e-10
r432	DIMGP[c] -> IMACP[c]	4.2.1.19	0.0117682	0.0117682	0.0117682	0.0117682	0.0117682	0.0117682	0.0117682	0.0117682	0.0117682	1.15016e-10
r433	ATP[c] + TRNA[c] + HIS[c] -> AMP[c] + PPI[c] + HHTRNA[c]	6.1.1.21	5.70233e-11	2.91755e-11	0	6.10935e-11	0	-4.29859e-11	0	2.49676e-11	2.36763e-11	1.15016e-10
r434	ARG[p] + NADPH[p] + O2[p] -> CITR[p] + NITOXE[p] + NADP[p]	1.14.13.39	0	0	0	0	0	0	0	0	0	0
r435	PRBATP[c] -> PPI[c] + PRBAMP[c]	3.6.1.31	0.0117682	0.0117682	0.0117682	0.0117682	0.0117682	0.0117682	0.0117682	0.0117682	0.0117682	1.15016e-10
r436	PRBAMP[c] -> PRFP[c]	3.5.4.19	0.0117682	0.0117682	0.0117682	0.0117682	0.0117682	0.0117682	0.0117682	0.0117682	0.0117682	1.15016e-10
r437	GLN[c] + PRLP[c] -> GLU[c] + DIMGP[c] + AICAR[c]	2.4.2.-; 4.1.3.-	0.0117682	0.0117682	0.0117682	0.0117682	0.0117682	0.0117682	0.0117682	0.0117682	0.0117682	1.15016e-10
r438	AKG[c] + ILE[c] <=> GLU[c] + OMVAL[c]	2.6.1.42	-0.0267207	-0.0267207	-0.0267207	-0.0267207	-0.0267207	-0.0267207	-0.0267207	-0.0267207	-0.0267207	-1.46644e-32
r439	AKG[m] + ILE[m] <=> GLU[m] + OMVAL[m]	2.6.1.42	0	0	0	0	0	0	0	0	0	0
r440	AKG[c] + VAL[c] <=> GLU[c] + OIVAL[c]	2.6.1.42	-0.0152294	-0.0152294	-0.0152294	-0.0152294	-0.0152294	-0.0152294	-0.0152294	-0.0152294	-0.0152294	7.33221e-33
r441	AKG[m] + VAL[m] <=> GLU[m] + OIVAL[m]	2.6.1.42	1000	1000	1000	1000	1000	1000	1000	1000	1000	0
r442	AKG[c] + LEU[c] <=> GLU[c] + OICAP[c]	2.6.1.42	-0.0406579	-0.0406579	-0.0406579	-0.0406579	-0.0406579	-0.0406579	-0.0406579	-0.0406579	-0.0406579	0
r443	AKG[m] + LEU[m] <=> GLU[m] + OICAP[m]	2.6.1.42	0	0	0	0	0	0	0	0	0	0
r444	PYR[m] + OBUT[m] -> CO2[m] + ABUT[m]	2.2.1.6	0.0267207	0.0267207	0.0267207	0.0267207	0.0267207	0.0267207	0.0267207	0.0267207	0.0267207	6.2253e-10
r445	PYR[c] + OBUT[c] -> CO2[c] + ABUT[c]	2.2.1.6	0	0	0	0	0	0	0	0	0	0
r446	2 PYR[m] -> CO2[m] + ACLAC[m]	2.2.1.6	0.0558873	0.0558873	0.0558873	0.0558873	0.0558873	0.0558873	0.0558873	0.0558873	0.0558873	-4.33359e-11
r447	2 PYR[c] -> CO2[c] + ACLAC[c]	2.2.1.6	0	0	0	0	0	0	0	0	0	0
r448	ALA[m] + OIVAL[m] <=> PYR[m] + VAL[m]	2.6.1.66	1000	1000	1000	1000	1000	1000	1000	1000	1000	0
r449	NADPH[m] + ACLAC[m] -> NADP[m] + DHVAL[m]	1.1.1.86	0.0558873	0.0558873	0.0558873	0.0558873	0.0558873	0.0558873	0.0558873	0.0558873	0.0558873	-4.33359e-11
r450	NADPH[m] + ABUT[m] -> NADP[m] + DHMVA[m]	1.1.1.86	0.0267207	0.0267207	0.0267207	0.0267207	0.0267207	0.0267207	0.0267207	0.0267207	0.0267207	-1.21082e-10
r451	DHVAL[m] -> OIVAL[m]	4.2.1.9	0.0558873	0.0558873	0.0558873	0.0558873	0.0558873	0.0558873	0.0558873	0.0558873	0.0558873	1.13574e-10
r452	DHVAL[c] -> OIVAL[c]	4.2.1.9	0	0	0	0	0	0	0	0	0	0
r453	DHMVA[m] -> OMVAL[m]	4.2.1.9	0.0267207	0.0267207	0.0267207	0.0267207	0.0267207	0.0267207	0.0267207	0.0267207	0.0267207	-1.21082e-10
r454	DHMVA[c] -> OMVAL[c]	4.2.1.9	0	0	0	0	0	0	0	0	0	0
r455	ACCOA[c] + OIVAL[c] -> COA[c] + IPPMAL[c]	2.3.3.13	0.0406579	0.0406579	0.0406579	0.0406579	0.0406579	0.0406579	0.0406579	0.0406579	0.0406579	8.96168e-11
r456	PPMAL[c] <=> IPPMAL[c]	4.2.1.33	0	0	0	0	0	0	0	0	0	0
r457	CBHCAP[c] <=> IPPMAL[c]	4.2.1.33	0	0	0	0	0	0	0	0	0	0
r458	CBHCAP[m] <=> IPPMAL[m]	4.2.1.33	0	0	0	0	0	0	0	0	0	0
r459	NAD[c] + IPPMAL[c] -> NADH[c] + CO2[c] + OICAP[c]	1.1.1.85	0.0406579	0.0406579	0.0406579	0.0406579	0.0406579	0.0406579	0.0406579	0.0406579	0.0406579	8.96168e-11
r460	NAD[m] + COA[m] + OIVAL[m] -> NADH[m] + CO2[m] + ISOBUCOA[m]	1.2.4.4: 1.8.1.4: 2.3.1.168	1.41609e-13	0	1.06581e-13	0	1.28313e-13	0	0	0	2.42303e-13	-8.72021e-14
r461	NAD[m] + COA[m] + OMVAL[m] -> NADH[m] + CO2[m] + METBUCOA[m]	1.2.4.4: 1.8.1.4: 2.3.1.168	0	0	0	0	1.28006e-13	0	0	8.7798e-11	0	-1.21134e-10
r462	NAD[m] + COA[m] + OICAP[m] -> NADH[m] + CO2[m] + ISOVACOA[m]	1.2.4.4: 1.8.1.4: 2.3.1.168	0	5.22422e-13	0	0	0	0	0	0	0	7.20782e-13
r463	FAD[m] + METBUCOA[m] -> FADH2[m] + MCRCOA[m]	1.3.99.10	0	0	0	0	1.28006e-13	0	0	8.7798e-11	0	-1.21134e-10
r464	FAD[m] + METBUCOA[c] -> FADH2[m] + MCRCOA[c]	1.3.99.10	0	0	0	0	0	0	0	0	0	0
r465	ATP[c] + HCO3[c] + MCRCOA[c] -> ADP[c] + PI[c] + MGCOA[c]	6.4.1.4	0	0	0	0	0	0	0	0	0	0
r466	ATP[m] + HCO3[m] + MCRCOA[m] -> PI[m] + ADP[m] + MGCOA[m]	6.4.1.4	0	0	0	0	0	0	0	8.7798e-11	0	-1.21134e-10
r467	H2O[m] + MGCOA[m] <=> H3MCOA[m]	4.2.1.18	0	0	0	0	0	0	0	8.7798e-11	0	-1.21134e-10
r468	H2O[c] + MGCOA[c] <=> H3MCOA[c]	4.2.1.18	0	0	0	0	0	0	0	0	0	0
r469	COA[c] + H3MCOA[c] -> ACCOA[c] + ACTAC[c]	4.1.3.4	0	-1.19674e-13	1.0935e-13	0	1.28284e-13	0	0	0	3.61907e-13	-7.30295e-13
r470	FAD[m] + ISOBUCOA[c] -> FADH2[m] + MCRLCOA[c]	1.3.99.3	0	0	0	0	0	0	0	0	0	0
r471	H2O[c] + MCRLCOA[c] -> HYISOBYCOA[c]	4.2.1.17	0	0	0	0	0	0	0	0	0	0
r472	H2O[m] + MCRLCOA[m] -> HYISOBYCOA[m]	4.2.1.17	0	0	0	0	0	0	0	0	0	0
r473	H2O[m] + HYISOBYCOA[m] -> COA[m] + HYISOBYR[m]	3.1.2.4	0	0	0	0	0	0	0	0	0	0
r474	H2O[b] + HYISOBYCOA[b] -> COA[b] + HYISOBYR[b]	3.1.2.4	0	0	0	0	0	0	0	0	0	0
r475	HYISOCOA[c] + H2O[c] -> HYISORATE[c] + COA[c]	3.1.2.4	0	0	0	0	0	0	0	0	0	0
r476	HYISOCOA[m] + H2O[m] -> HYISORATE[m] + COA[m]	3.1.2.4	0	0	0	0	0	0	0	0	0	0
r477	NAD[m] + HYISOBYR[m] <=> NADH[m] + MMSHY[m]	1.1.1.31	0	0	0	0	0	0	0	0	0	0
r478	NAD[m] + COA[m] + MMSHY[m] -> NADH[m] + CO2[m] + PROPCOA[m]	1.2.1.27	0	-2.02505e-13	0	-1.22125e-13	1.27898e-13	0	0	0	0	-3.35559e-13
r479	NAD[c] + COA[c] + MMSHY[c] -> NADH[c] + CO2[c] + PROPCOA[c]	1.2.1.27	0	0	1.07914e-13	0	1.27454e-13	0	0	1.57208e-13	1.25941e-13	-3.49319e-13
r480	FAD[m] + METBUCOA[c] -> FADH2[m] + MEBUELCOA[c]	1.3.99.3	0	0	0	0	0	0	0	0	0	0
r481	H2O[c] + MEBUELCOA[c] -> METBYCOA[c]	4.2.1.17	0	0	0	0	0	0	0	0	0	0
r482	H2O[m] + MEBUELCOA[m] -> METBYCOA[m]	4.2.1.17	0	0	0	0	0	0	0	0	0	0
r483	NAD[m] + METBYCOA[m] <=> NADH[m] + MCECOA[m]	1.1.1.35	0	0	0	0	0	0	0	0	0	0
r484	NAD[b] + METBYCOA[b] <=> NADH[b] + MCECOA[b]	1.1.1.178	0	0	0	0	0	0	0	0	0	0
r485	COA[p] + MCECOA[p] -> ACCOA[p] + PROPCOA[p]	2.3.1.16	0	0	0	0	0	0	0	0	0	0
r486	COA[m] + MCECOA[m] -> ACCOA[m] + PROPCOA[m]	2.3.1.16	0	0	0	0	0	0	0	0	0	0
r487	COA[c] + MCECOA[c] -> ACCOA[c] + PROPCOA[c]	2.3.1.16	0	0	0	0	0	0	0	0	0	0
r488	ATP[p] + PROPCOA[p] + HCO3[p] -> ADP[p] + PI[p] + SMMNYLCOA[p]	6.4.1.3	0	0	0	0	0	0	0	0	0	0
r489	ATP[m] + PROPCOA[m] + HCO3[m] -> ADP[m] + PI[m] + SMMNYLCOA[m]	6.4.1.3	0	0	0	0	0	0	0	0	0	0
r490	ATP[c] + TRNA[c] + ILE[c] -> AMP[c] + PPI[c] + LILEUTRNA[c]	6.1.1.5	0	0	0	0	0	0	0	0	0	0
r491	ATP[m] + TRNA[m] + ILE[m] -> PPI[m] + AMP[m] + LILEUTRNA[m]	6.1.1.5	0	0	0	0	0	0	0	0	0	0
r492	ATP[c] + TRNA[c] + VAL[c] -> AMP[c] + PPI[c] + LValTRNA[c]	6.1.1.9	0	0	0	0	0	0	0	0	0	0
r493	ATP[c] + TRNA[c] + LEU[c] -> AMP[c] + PPI[c] + LLeuTRNA[c]	6.1.1.4	0	0	0	0	0	0	0	0	0	0
r494	ATP[m] + TRNA[m] + LEU[m] -> AMP[m] + PPI[m] + LLeuTRNA[m]	6.1.1.4	0	0	0	0	0	0	0	0	0	0
r495	ACCOA[c] + H2O[c] + AKG[c] -> COA[c] + HCIT[c]	2.3.3.14	0.0287974	0.0287974	0.0287974	0.0287974	0.0287974	0.0287974	0.0287974	0.0287974	0.0287974	0
r496	ACCOA[m] + H2O[m] + AKG[m] -> COA[m] + HCIT[m]	2.3.3.14	0	0	0	0	0	0	0	0	0	0
r497	HCIT[c] <=> HICIT[c]	4.2.1.36	0.0287974	0.0287974	0.0287974	0.0287974	0.0287974	0.0287974	0.0287974	0.0287974	0.0287974	0
r498	NAD[c] + HICIT[c] <=> NADH[c] + CO2[c] + AKA[c]	1.1.1.87	0.0287974	0.0287974	0.0287974	0.0287974	0.0287974	0.0287974	0.0287974	0.0287974	0.0287974	0
r499	TYR[c] + AKG[c] <=> GLU[c] + 4HPP[c]	2.6.1.5	999.985	999.985	999.985	999.985	999.985	999.985	999.985	999.985	999.985	0
r500	ATP[c] + NADPH[c] + AMA[c] -> NADP[c] + AMASA[c] + AMP[c] + PPI[c]	1.2.1.31	0.0287974	0.0287974	0.0287974	0.0287974	0.0287974	0.0287974	0.0287974	0.0287974	0.0287974	0
r501	ATP[b] + NADPH[b] + AMA[b] -> NADP[b] + AMASA[b] + AMP[b] + PPI[b]	1.2.1.31	0	0	0	0	0	0	0	0	0	0
r502	NADPH[c] + GLU[c] + AMASA[c] <=> NADP[c] + SACP[c]	1.5.1.10	0.0287974	0.0287974	0.0287974	0.0287974	0.0287974	0.0287974	0.0287974	0.0287974	0.0287974	0
r503	NADH[m] + GLU[m] + AMASA[m] <=> NAD[m] + SACP[m]	1.5.1.9	0	0	0	0	0	0	0	0	0	0
r504	NADPH[m] + AKG[m] + LYS[m] <=> NADP[m] + SACP[m]	1.5.1.8	1000	1000	1000	1000	1000	1000	1000	1000	1000	0
r505	NADH[m] + AKG[m] + LYS[m] <=> NAD[m] + SACP[m]	1.5.1.7	1000	1000	1000	1000	1000	1000	1000	1000	1000	0
r506	NADH[c] + AKG[c] + LYS[c] <=> NAD[c] + SACP[c]	1.5.1.7	-0.0287974	-0.0287974	-0.0287974	-0.0287974	-0.0287974	-0.0287974	-0.0287974	-0.0287974	-0.0287974	0
r507	NAD[c] + H2O[c] + ALA[c] -> NADH[c] + PYR[c] + NH3[c]	1.4.1.1	1000	1000	1000	1000	1000	1000	1000	1000	1000	0
r508	NAD[m] + H2O[m] + ALA[m] -> NADH[m] + PYR[m] + NH3[m]	1.4.1.1	1000	1000	1000	1000	1000	1000	1000	1000	1000	0
r509	PYR[c] + ASPSA[c] -> 2 H2O[c] + DIDIPC[c]	4.2.1.52	0	0	0	0	0	0	0	0	0	0
r510	ATP[c] + TRNA[c] + LYS[c] -> AMP[c] + PPI[c] + LLTRNA[c]	6.1.1.6	0	0	0	0	0	0	0	0	0	0
r511	SAM[c] + HISLYS[c] -> SAH[c] + TMLS[c]	2.1.1.43	0	0	0	0	0	0	0	0	0	0
r512	AKG[m] + O2[m] + TMLS[m] -> CO2[m] + SUCC[m] + HTMLS[m]	1.14.11.8	0	0	0	0	0	0	0	0	0	0
r513	HTMLS[m] -> GLY[m] + TMAMMOBNAL[m]	4.1.2.-	0	0	0	0	0	0	0	0	0	0
r514	NAD[c] + H2O[c] + TMAMMOBNAL[c] <=> NADH[c] + TMAMMOBNATE[c]	1.2.1.3	0	0	0	0	0	0	0	0	0	0
r515	NAD[m] + H2O[m] + TMAMMOBNAL[m] <=> NADH[m] + TMAMMOBNATE[m]	1.2.1.3	0	0	0	0	0	0	0	0	0	0
r516	AKG[c] + O2[c] + TMAMMOBNATE[c] -> CO2[c] + SUCC[c] + CAR[c]	1.14.11.1	0	0	0	0	0	0	0	0	0	0
r517	GLU[c] + AKA[c] <=> AKG[c] + AMA[c]	2.6.1.39	0.0287974	0.0287974	0.0287974	0.0287974	0.0287974	0.0287974	0.0287974	0.0287974	0.0287974	0
r518	A6OXO[b] + NADP[b] + AMP[b] + PPI[b] -> AMA[b] + NADPH[b] + ATP[b]	1.2.1.95	0	0	0	0	0	0	0	0	0	0
r519	A6OXO[c] + NADP[c] + AMP[c] + PPI[c] -> AMA[c] + NADPH[c] + ATP[c]	1.2.1.95	0	0	0	0	0	0	0	0	0	0
r520	PYR[c] + ASPSA[c] -> HTET[c]+ H2O[c]	4.3.3.7	0	0	0	0	0	0	0	0	0	0
r521	PI[c] + 5MTA[c] -> 5THR1P[c] + AD[c]	2.4.2.28	0	0	0	1.32559e-10	0	0	1.51723e-10	0	0	-7.85907e-11
r522	5THR1P[c] -> METHIR1P[c]	5.3.1.23	0	0	0	0	0	0	0	0	0	0
r523	METHIR1P[c] -> H2O[c] + METHPENP[c]	4.2.1.109	0	0	0	0	0	0	0	0	0	0
r524	METHIR1P[m] -> H2O[m] + METHPENP[m]	4.2.1.109	0	0	0	0	0	0	0	0	0	0
r525	H2O[c] + METHPENP[c] -> PI[c] + DHYXPENT[c]	3.1.3.77	0	0	0	0	0	0	0	0	0	0
r526	CYS[c] + PHSER[c] -> SUCC[c] + LLCT[c]	2.5.1.48	0	3.04086e-10	0	2.24009e-10	0	0	0	0	0	5.22566e-10
r527	H2O[m] + LLCT[m] -> PYR[m] + NH3[m] + HCYS[m]	4.4.1.8	999.449	999.049	998.649	998.249	997.849	997.449	997.049	996.649	996.249	11.0375
r528	HCYS[c] + MTHPTGLU[c] -> THPTGLU[c] + MET[c]	2.1.1.14	0	0	0	0	0	0	0	0	0	0
r529	HCYS[c] + MTHF[c] -> THF[c] + MET[c]	2.1.1.13	0.0180234	0.0180234	0.0180234	0.0180234	0.0180234	0.0180234	0.0180234	0.0180234	0.0180234	-2.19433e-09
r530	ATP[c] + MET[c] -> PI[c] + PPI[c] + SAM[c]	2.5.1.6	0.00653208	0.00653208	0.00653208	0.00653208	0.00653208	0.00653208	0.00653208	0.00653208	0.00653208	3.03245e-10
r531	SAH[c] -> HCYS[c] + ADN[c]	3.3.1.1	0.00653208	0.00653208	0.00653208	0.00653208	0.00653208	0.00653208	0.00653208	0.00653208	0.00653208	1.33223e-09
r532	H2S[c] + OAHSER[c] -> AC[c] + HCYS[c]	2.5.1.49	0.0114913	0.0114913	0.0114913	0.0114913	0.0114913	0.0114913	0.0114913	0.0114913	0.0114913	0
r533	LLCT[c] -> NH3[c] + CYS[c] + OBUT[c]	4.4.1.1	0	0	0	0	0	0	0	0	0	0
r534	LLCT[m] -> NH3[m] + CYS[m] + OBUT[m]	4.4.1.1	0	0	0	0	0	0	0	0	0	0
r535	SAM[c] + HCYS[c] -> SAH[c] + MET[c]	2.1.1.10	5.85742e-10	2.61356e-10	3.48127e-10	9.81789e-10	9.51559e-10	-1.02292e-10	-9.97023e-10	-1.99612e-10	9.61783e-12	3.43165e-09
r536	SAM[c] + CALH[c] -> SAH[c] + DPTH[c]	2.1.1.98	0	0	0	0	0	0	0	0	0	0
r537	ATP[c] + TRNA[c] + MET[c] -> AMP[c] + PPI[c] + LMETTRNA[c]	6.1.1.10	1.25309e-11	1.72377e-11	2.7651e-11	5.86906e-11	8.48175e-11	-4.8308e-12	7.69723e-11	-2.66271e-11	2.90707e-11	1.39413e-11
r538	ATP[m] + TRNA[m] + MET[m] -> AMP[m] + PPI[m] + LMETTRNA[m]	6.1.1.10	0	0	0	0	0	0	0	0	0	0
r539	ATP[e] + MET[e] + TRNA[e] -> AMP[e] + PPI [e]+ LMETTRNA[e]	6.1.1.10	0	0	0	0	0	0	0	0	0	0
r540	PEP[c] + E4P[c] -> PI[c] + 3DDAH7P[c]	2.5.1.54	0.0383042	0.0383042	0.0383042	0.0383042	0.0383042	0.0383042	0.0383042	0.0383042	0.0383042	5.5508e-10
r541	3DDAH7P[c] -> PI[c] + DQT[c]	4.2.3.4	0.0383042	0.0383042	0.0383042	0.0383042	0.0383042	0.0383042	0.0383042	0.0383042	0.0383042	5.5508e-10
r542	3DDAH7P[b] -> PI[b] + DQT[b]	4.2.3.4	0	0	0	0	0	0	0	0	0	0
r543	DQT[c] -> DHSK[c]	4.2.1.10	0.0383042	0.0383042	0.0383042	0.0383042	0.0383042	0.0383042	0.0383042	0.0383042	0.0383042	5.5508e-10
r544	DQT[b] -> DHSK[b]	4.2.1.10	0	0	0	0	0	0	0	0	0	0
r545	NADPH[m] + DHSK[m] -> NADP[m] + SME[m]	1.1.1.25	0.0383042	0.0383042	0.0383042	0.0383042	0.0383042	0.0383042	0.0383042	0.0383042	0.0383042	5.5508e-10
r546	NADPH[b] + DHSK[b] -> NADP[b] + SME[b]	1.1.1.25	0	0	0	0	0	0	0	0	0	0
r547	ATP[c] + SME[c] -> ADP[c] + SME3P[c]	2.7.1.71	0.0383042	0.0383042	0.0383042	0.0383042	0.0383042	0.0383042	0.0383042	0.0383042	0.0383042	5.5508e-10
r548	ATP[b] + SME[b] -> ADP[b] + SME3P[b]	2.7.1.71	0	0	0	0	0	0	0	0	0	0
r549	PEP[c] + SME3P[c] -> PI[c] + 3PSME[c]	2.5.1.19	0.0383042	0.0383042	0.0383042	0.0383042	0.0383042	0.0383042	0.0383042	0.0383042	0.0383042	5.5508e-10
r550	PEP[b] + SME3P[b] -> PI[b] + 3PSME[b]	2.5.1.19	0	0	0	0	0	0	0	0	0	0
r551	3PSME[c] -> PI[c] + CHOR[c]	4.2.3.5	0.0383042	0.0383042	0.0383042	0.0383042	0.0383042	0.0383042	0.0383042	0.0383042	0.0383042	5.5508e-10
r552	3PSME[m] -> PI[m] + CHOR[m]	4.2.3.5	0	0	0	0	0	0	0	0	0	0
r553	CHOR[c] + GLN[c] -> PYR[c] + GLU[c] + AN[c]	4.1.3.27	0.00512261	0.00512261	0.00512261	0.00512261	0.00512261	0.00512261	0.00512261	0.00512261	0.00512261	8.98214e-11
r554	CHOR[m] + GLN[m] -> PYR[m] + GLU[m] + AN[m]	4.1.3.27	0	0	0	0	0	0	0	0	0	0
r555	PRPP[c] + AN[c] -> PPI[c] + NPRAN[c]	2.4.2.18	0.484377	0.884377	1.28438	1.68438	2.08438	2.48438	2.88438	3.28438	3.68438	-11.0375
r556	NPRAN[c] -> CPAD5P[c]	5.3.1.24	0.484377	0.884377	1.28438	1.68438	2.08438	2.48438	2.88438	3.28438	3.68438	-11.0375
r557	CPAD5P[c] -> CO2[c] + IGP[c]	4.1.1.48	0.484377	0.884377	1.28438	1.68438	2.08438	2.48438	2.88438	3.28438	3.68438	-11.0375
r558	SER[c] + IGP[c] -> T3P1[c] + TRP[c]	4.2.1.20	0.484377	0.884377	1.28438	1.68438	2.08438	2.48438	2.88438	3.28438	3.68438	-11.0375
r559	O2[c] + TRP[c] -> FKYN[c]	1.13.11.52	0.479255	0.879255	1.27925	1.67925	2.07925	2.47925	2.87925	3.27925	3.67925	-11.0375
r560	FKYN[c] -> FOR[c] + KYN[c]	3.5.1.9	0.479255	0.879255	1.27925	1.67925	2.07925	2.47925	2.87925	3.27925	3.67925	-11.0375
r561	FKYN[e] -> FOR[e] + KYN[e]	3.5.1.9	0	0	0	0	0	0	0	0	0	0
r562	NADPH[m] + O2[m] + KYN[m] -> H2O[m] + NADP[m] + HKYN[m]	1.14.13.9	5.46466e-13	-4.68958e-13	1.08116e-13	0	3.62715e-13	0	-2.34479e-13	-1.04823e-12	2.20712e-13	1.71359e-12
r563	KYN[c] -> ALA[c] + AN[c]	3.7.1.3	0.479255	0.879255	1.27925	1.67925	2.07925	2.47925	2.87925	3.27925	3.67925	-11.0375
r564	HKYN[c] -> ALA[c] + HAN[c]	3.7.1.3	5.46466e-13	-4.68958e-13	1.08116e-13	0	-2.25153e-13	0	-2.34479e-13	-1.04823e-12	2.20712e-13	1.71359e-12
r565	O2[c] + HAN[c] -> CMUSA[c]	1.13.11.6	5.46466e-13	-4.68958e-13	1.08116e-13	0	-2.25153e-13	0	-2.34479e-13	-1.04823e-12	2.20712e-13	1.71359e-12
r566	CHOR[c] -> PHEN[c]	5.4.99.5	0.0331816	0.0331816	0.0331816	0.0331816	0.0331816	0.0331816	0.0331816	0.0331816	0.0331816	5.98211e-10
r567	NADP[c] + PHEN[c] -> CO2[c] + NADPH[c] + 4HPP[c]	1.3.1.13	0.0152294	0.0152294	0.0152294	0.0152294	0.0152294	0.0152294	0.0152294	0.0152294	0.0152294	5.98301e-10
r568	AKG[c] + TYR[c] <=> GLU[c] + 4HPP[c]	2.6.1.1	999.985	999.985	999.985	999.985	999.985	999.985	999.985	999.985	999.985	0
r569	AKG[m] + TYR[m] <=> GLU[m] + 4HPP[m]	2.6.1.1	0	0	0	0	0	0	0	0	0	0
r570	O2[c] + PHE[c] + TTHBOTR[c] -> TYR[c] + HYTTHBOTR[c]	1.14.16.1	0	0	0	0	0	0	0	0	0	0
r571	4HPP[c] <=> HYHYPREATE[c]	5.3.2.1	0	0	0	0	0	0	0	0	0	0
r572	O2[c] + 4HPP[c] -> CO2[c] + HOMOGEN[c]	1.13.11.27	5.85872e-11	-2.3114e-11	1.40759e-11	1.17192e-10	1.14881e-10	-6.60669e-11	-4.89848e-11	-2.99863e-11	-4.57116e-11	3.43632e-10
r573	O2[c] + HOMOGEN[c] -> MACAC[c]	1.13.11.5	5.85872e-11	-2.3114e-11	1.40759e-11	1.17192e-10	1.14881e-10	-6.60669e-11	-4.89848e-11	-2.99863e-11	-4.57116e-11	3.43632e-10
r574	O2[c] + GEN[c] -> MAYLPYR[c]	1.13.11.4	0	0	0	0	0	0	0	0	0	0
r575	MACAC[c] -> FUACAC[c]	5.2.1.2	5.85872e-11	-2.3114e-11	1.40759e-11	1.17192e-10	1.14881e-10	-6.60669e-11	-4.89848e-11	-2.99863e-11	-4.57116e-11	3.43632e-10
r576	FUACAC[c] -> FUM[c] + ACTAC[c]	3.7.1.2	5.85872e-11	-2.3114e-11	1.40759e-11	1.17192e-10	1.14881e-10	-6.60669e-11	-4.89848e-11	-2.99863e-11	-4.57116e-11	3.43632e-10
r577	H2O[c] + ACYLPYR[c] -> PYR[c] + FUM[c]	3.7.1.5	0	0	0	0	0	0	0	0	0	0
r578	H2O[m] + ACYLPYR[m] -> PYR[m] + FUM[m]	3.7.1.5	0	0	0	0	0	0	0	0	0	0
r579	2 H2O2[p] -> 2 H2O[p] + O2[p]	1.11.1.6	0	0	0	0	0	0	0	0	0	0
r580	2 H2O2[c] -> 2 H2O[c] + O2[c]	1.11.1.6	0	0	0	0	0	0	0	0	0	0
r581	AKA[c] -> CO2[c] + GLTCOA[c]	1.2.4.2	0	0	0	0	0	0	0	0	0	0
r582	AKA[m] -> CO2[m] + GLTCOA[m]	1.2.4.2	0	0	0	0	0	0	0	0	0	0
r583	O2[c] + ASPERMD[c] -> H2O2[c] + APRUT[c] + APROA[c]	1.5.3.11	1.29229e-11	0	-2.5121e-11	0	0	0	0	0	5.93024e-11	-1.08425e-10
r584	O2[c] + APRUT[c] -> H2O2[c] + APROA[c] + GABAL[c]	1.5.3.11	0	0	0	0	0	0	0	0	0	0
r585	AKG[c] + KYN[c] -> GLU[c] + APEBU[c]	2.6.1.7	0	0	0	0	0	0	0	0	0	0
r586	AKG[m] + KYN[m] -> GLU[m] + APEBU[m]	2.6.1.7	0	0	0	0	0	0	0	0	0	0
r587	ATP[m] + TRNA[m] + TYR[m] -> PPI[m] + AMP[m] + LTyrTRNA[m]	6.1.1.1	0	0	0	0	0	0	0	0	0	0
r588	ATP[c] + TRNA[c] + TYR[c] -> AMP[c] + PPI[c] + LTyrTRNA[c]	6.1.1.1	0	0	0	0	0	0	0	0	0	0
r589	ATP[m] + TRNA[m] + TRP[m] -> PPI[m] + AMP[m] + TRPTRNA[m]	6.1.1.2	0	0	0	0	0	0	0	0	0	0
r590	ATP[c] + TRNA[c] + TRP[c] -> AMP[c] + PPI[c] + TRPTRNA[c]	6.1.1.2	0	0	0	0	0	0	0	0	0	0
r591	ATP[c] + TRNA[c] + PHE[c] -> AMP[c] + PPI[c] + LPheTRNA[c]	6.1.1.20	0	0	0	0	0	0	0	0	0	0
r592	4CMCOA[c] -> CAFFCOA[c]	1.14.13.-	0	0	0	1.13687e-13	1.13687e-13	0	0	0	0	5.22843e-14
r593	SAM[m] + CAFFCOA[m] -> SAH[m] + FERYLCOA[m]	2.1.1.104	0	0	0	0	0	0	0	0	0	0
r594	ACCOA[c] + SERNIN[c] -> COA[c] + NSERNIN[c]	2.3.1.87	0	0	0	0	0	0	0	0	0	0
r595	PHEN[c] -> CO2[c] + PHPYR[c]	4.2.1.51	0.0179522	0.0179522	0.0179522	0.0179522	0.0179522	0.0179522	0.0179522	0.0179522	0.0179522	1.46644e-32
r596	GLU[c] + PHPYR[c] <=> AKG[c] + PHE[c]	2.6.1.57	0.0179522	0.0179522	0.0179522	0.0179522	0.0179522	0.0179522	0.0179522	0.0179522	0.0179522	1.46644e-32
r597	GLU[m] + PHPYR[m] <=> AKG[m] + PHE[m]	2.6.1.57	0	0	0	0	0	0	0	0	0	0
r598	DHBZA + O2 -> MPYR	1.13.11.4	0	0	0	0	0	0	0	0	0	0
r599	ACCOA[c] + PHOPTRIN[c] -> COA[c] + APHOPTRIN[c]	2.3.1.183	0	0	0	0	0	0	0	0	0	0
r600	ATP[c] + R5P[c] <=> AMP[c] + PRPP[c]	2.7.6.1	0.826398	1.4264	2.0264	2.6264	3.2264	3.8264	4.4264	5.0264	5.6264	-16.5563
r601	ATP[b] -> PPI[b] + cAMP[b]	4.6.1.1	0	0	0	0	0	0	0	0	0	0
r602	ATP[c] -> PPI[c] + cAMP[c]	4.6.1.1	4.25653e-10	2.67601e-10	-1.53901e-09	3.34108e-10	9.15354e-10	5.49482e-10	-4.15234e-10	3.64968e-10	-2.25478e-10	-6.92142e-11
r603	CAIR[c] <=> CO2[c] + AIR[c]	4.1.1.21	-0.237009	-0.437009	-0.637009	-0.837009	-1.03701	-1.23701	-1.43701	-1.63701	-1.83701	5.51877
r604	ATP[c] + ASP[c] + CAIR[c] <=> ADP[c] + PI[c] + SAICAR[c]	6.3.2.6	0.237009	0.437009	0.637009	0.837009	1.03701	1.23701	1.43701	1.63701	1.83701	-5.51877
r605	SAICAR[c] <=> FUM[c] + AICAR[c]	4.3.2.2	0.237009	0.437009	0.637009	0.837009	1.03701	1.23701	1.43701	1.63701	1.83701	-5.51877
r606	ATP[c] + FGAM[c] -> ADP[c] + PI[c] + AIR[c]	6.3.3.1	0.237009	0.437009	0.637009	0.837009	1.03701	1.23701	1.43701	1.63701	1.83701	-5.51877
r607	ATP[c] + GLY[c] + PRAM[c] <=> ADP[c] + PI[c] + GAR[c]	6.3.4.13	0.237009	0.437009	0.637009	0.837009	1.03701	1.23701	1.43701	1.63701	1.83701	-5.51877
r608	ATP[c] + GLN[c] + FGAR[c] -> ADP[c] + PI[c] + GLU[c] + FGAM[c]	6.3.5.3	0.237009	0.437009	0.637009	0.837009	1.03701	1.23701	1.43701	1.63701	1.83701	-5.51877
r609	GAR[c] + FTHF[c] -> THF[c] + FGAR[c]	2.1.2.2	0.237009	0.437009	0.637009	0.837009	1.03701	1.23701	1.43701	1.63701	1.83701	-5.51877
r610	GLN[c] + PRPP[c] -> PPI[c] + GLU[c] + PRAM[c]	2.4.2.14	0.237009	0.437009	0.637009	0.837009	1.03701	1.23701	1.43701	1.63701	1.83701	-5.51877
r611	AICAR[c] + FTHF[c] <=> THF[c] + PRFICA[c]	2.1.2.3	0.248777	0.448777	0.648777	0.848777	1.04878	1.24878	1.44878	1.64878	1.84878	-5.51877
r612	PRFICA[c] <=> IMP[c]	3.5.4.10	0.248777	0.448777	0.648777	0.848777	1.04878	1.24878	1.44878	1.64878	1.84878	-5.51877
r613	GTP[c] + ASP[c] + IMP[c] -> PI[c] + GDP[c] + ASUC[c]	6.3.4.4	0.0162184	0.0162184	0.0162184	0.0162184	0.0162184	0.0162184	0.0162184	0.0162184	0.0162184	8.09231e-09
r614	ASUC[c] <=> FUM[c] + AMP[c]	4.3.2.2	0.0162184	0.0162184	0.0162184	0.0162184	0.0162184	0.0162184	0.0162184	0.0162184	0.0162184	8.09231e-09
r615	ATP[c] + GLN[c] + XMP[c] -> AMP[c] + PPI[c] + GLU[c] + GMP[c]	6.3.5.2	0.232559	0.432559	0.632559	0.832559	1.03256	1.23256	1.43256	1.63256	1.83256	-5.51877
r616	ATP[c] + GMP[c] <=> ADP[c] + GDP[c]	2.7.4.8	1000	1000	1000	1000	1000	1000	1000	1000	1000	0
r617	ATP[c] + DGMP[c] <=> ADP[c] + DGDP[c]	2.7.4.8	4.72181e-10	2.59494e-10	-4.15286e-10	1.43083e-09	1.05688e-09	5.64623e-10	9.51236e-10	4.1058e-09	-6.77578e-10	-4.05018e-09
r618	GMP[c] + DATP[c] <=> GDP[c] + DADP[c]	2.7.4.8	999.996	999.996	999.996	999.996	999.996	999.996	999.996	999.996	999.996	-8.40731e-11
r619	H2O[c] + AMP[c] -> NH3[c] + IMP[c]	3.5.4.6	8.99423e-10	4.6104e-10	-8.28434e-10	2.84063e-09	2.20472e-09	1.12031e-09	1.90545e-09	-7.85257e-10	-1.36082e-09	4.15398e-09
r620	H2O[c] + cGMP[c] -> GMP[c]	3.1.4.17	0	0	0	0	0	0	0	0	0	0
r621	H2O[b] + cGMP[b] -> GMP[b]	3.1.4.17	0	0	0	0	0	0	0	0	0	0
r622	H2O[c] + cAMP[c] -> AMP[c]	3.1.4.17	4.73928e-10	2.59494e-10	-4.15866e-10	1.45412e-09	9.45507e-10	5.64618e-10	9.51236e-10	4.10439e-09	-6.77578e-10	-4.03484e-09
r623	H2O[b] + cAMP[b] -> AMP[b]	3.1.4.17	0	0	0	0	0	0	0	0	0	0
r624	H2O[c] + ADPRIB[c] -> AMP[c] + R5P[c]	3.6.1.13	0	0	0	0	0	0	0	0	0	0
r625	H2O[c] + GN[c] -> NH3[c] + XAN[c]	3.5.4.3	2.99586e-10	1.29883e-10	6.3929e-10	9.54853e-10	7.64002e-10	3.73839e-10	6.38352e-10	-2.84331e-10	-4.54975e-10	2.22764e-09
r626	H2O[e] + GN[e] -> NH3[e] + XAN[e]	3.5.4.3	1.28166e-10	0	0	8.89022e-11	1.61063e-10	0	0	0	-1.50389e-10	5.53313e-10
r627	H2O[p] + O2[p] + URATE[p] -> H2O2[p] + HIURTE[p]	1.7.3.3	0	0	0	0	0	0	0	0	0	0
r628	H2O[b] + HIURTE[b] -> ATN[b] + CO2[b]	3.5.2.17	0	0	0	0	0	0	0	0	0	0
r629	H2O[e] + HIURTE[e] -> ATN[e] + CO2[e]	3.5.2.17	5.16753e-10	0	0	-2.13731e-11	1.68534e-10	0	0	-4.74714e-11	0	1.00628e-09
r630	NAD[c] + IMP[c] -> NADH[c] + XMP[c]	1.1.1.205	0.232559	0.432559	0.632559	0.832559	1.03256	1.23256	1.43256	1.63256	1.83256	-5.51877
r631	NAD[m] + IMP[m] -> NADH[m] + XMP[m]	1.1.1.205	0	0	0	0	0	0	0	0	0	0
r632	H2O[c] + ITP[c] -> PPI[c] + IMP[c]	3.6.1.19	0	0	0	0	0	0	0	0	0	0
r633	H2O[c] + DITP[c] -> PPI[c] + DIMP[c]	3.6.1.19	0	0	0	0	0	0	0	0	0	0
r634	H2O[c] + GTP[c] -> PPI[c] + GMP[c]	3.6.1.19	1.46877e-09	2.31733e-09	-4.15866e-10	1.09037e-09	9.35525e-10	5.64735e-10	9.51236e-10	3.72616e-09	-6.78142e-10	9.89964e-10
r635	H2O[c] + DGTP[c] -> PPI[c] + DGMP[c]	3.6.1.19	1.46877e-09	-3.93335e-09	-4.15057e-10	1.09993e-09	9.34733e-10	5.64437e-10	9.52186e-10	3.7471e-09	-6.76669e-10	-7.66125e-09
r636	H2O[c] + XTP[c] -> PPI[c] + XMP[c]	3.6.1.19	0	0	0	0	0	0	0	0	0	0
r637	ATP[c] + SLF[c] -> PPI[c] + APS[c]	2.7.7.4	6.43943e-10	0	0	1.90867e-11	3.94621e-10	0	3.95175e-10	1.21809e-11	0	8.13083e-10
r638	ATP[m] + SLF[m] -> PPI[m] + APS[m]	2.7.7.4	3.16732e-10	0	0	0	0	0	0	4.54747e-13	0	5.82028e-10
r639	ATP[c] + APS[c] -> ADP[c] + PAPS[c]	2.7.1.25	0	0	0	1.90867e-11	3.94621e-10	0	3.95175e-10	1.21809e-11	0	-3.71508e-10
r640	H2O[c] + PAPS[c] -> SLF[c] + PAYL[c]	3.6.1.9	0	0	0	0	0	0	0	0	0	0
r641	ADP[c] + ATP[c] -> APPPPA[c] + PI[c]	2.7.7.53	2.2047e-09	4.149e-10	1.91247e-09	2.09025e-09	7.92866e-10	1.11868e-09	1.91221e-09	-4.13696e-09	-1.35595e-09	1.32774e-08
r642	H2O[c] + APPPPA[c] -> ATP[c] + AMP[c]	3.6.1.17	2.2047e-09	4.149e-10	1.91247e-09	2.09025e-09	7.92866e-10	1.11868e-09	1.91221e-09	-4.13696e-09	-1.35595e-09	1.32774e-08
r643	H2O[c] + APPPA[c] -> ADP[c] + AMP[c]	3.6.1.29	0	0	0	0	0	0	0	0	0	0
r644	UGC[e] <=> GLX[e]+ UREA[e]	4.3.2.3	0	0	0	0	0	0	0	0	0	0
r645	UGC[c] <=> GLX[c]+ UREA[c]	4.3.2.3	0	0	0	0	0	0	0	0	0	0
r646	ASP[c] + CAP[c] -> PI[c] + CAASP[c]	2.1.3.2	0.0932432	0.0932432	0.0932432	0.0932432	0.0932432	0.0932432	0.0932432	0.0932432	0.0932432	0
r647	CAASP[c] <=> DOROA[c]	3.5.2.3	0.0932432	0.0932432	0.0932432	0.0932432	0.0932432	0.0932432	0.0932432	0.0932432	0.0932432	0
r648	O2[c] + DOROA[c] <=> H2O2[c] + OROA[c]	1.3.3.1	5.7999e-10	2.38877e-10	-9.22001e-10	5.47173e-10	1.31481e-09	-3.96156e-10	1.88201e-09	-2.65914e-10	-3.40194e-10	2.43939e-10
r649	PRPP[c] + OROA[c] <=> PPI[c] + OMP[c]	2.4.2.10	0.0932432	0.0932432	0.0932432	0.0932432	0.0932432	0.0932432	0.0932432	0.0932432	0.0932432	0
r650	OMP[c] -> CO2[c] + UMP[c]	4.1.1.23	0.0932432	0.0932432	0.0932432	0.0932432	0.0932432	0.0932432	0.0932432	0.0932432	0.0932432	0
r651	PRPP[c] + URA[c] -> PPI[c] + UMP[c]	2.4.2.9	3.6023e-09	-9.95584e-11	1.20768e-09	2.71858e-09	1.81858e-09	1.98129e-10	1.95487e-09	-3.18589e-09	-1.35716e-09	1.38534e-08
r652	GTP[c] + URI[c] <=> GDP[c] + UMP[c]	2.7.1.48	3.60436e-09	-1.03377e-10	-4.87893e-10	2.53678e-09	2.1013e-09	1.10495e-09	1.95966e-09	-3.18722e-09	-1.33802e-09	1.17539e-08
r653	GTP[b] + URI[b] <=> GDP[b] + UMP[b]	2.7.1.48	0	0	0	0	0	0	0	0	0	0
r654	GTP[m] + URI[m] <=> GDP[m] + UMP[m]	2.7.1.48	3.84603e-10	0	5.70739e-11	3.47388e-10	1.99577e-10	2.75122e-11	1.79926e-10	0	0	7.41622e-10
r655	GTP[c] + CYTD[c] -> GDP[c] + CMP[c]	2.7.1.48	3.60436e-09	-1.03377e-10	3.56015e-12	2.53678e-09	2.1013e-09	1.10495e-09	1.95966e-09	-3.18767e-09	-1.74814e-09	1.29611e-08
r656	GTP[b] + CYTD[b] -> GDP[b] + CMP[b]	2.7.1.48	0	0	0	0	0	0	0	0	0	0
r657	GTP[m] + CYTD[m] -> GDP[m] + CMP[m]	2.7.1.48	0	0	0	0	0	0	0	0	0	0
r658	ATP[c] + URI[c] -> ADP[c] + UMP[c]	2.7.1.48	1000	1000	1000	1000	1000	1000	1000	1000	1000	0
r659	ATP[b] + URI[b] -> ADP[b] + UMP[b]	2.7.1.48	0	0	0	0	0	0	0	0	0	0
r660	ATP[m] + URI[m] -> ADP[m] + UMP[m]	2.7.1.48	1000	1000	1000	1000	1000	1000	1000	1000	1000	0
r661	H2O[e] + CYTD[e] -> NH3[e] + URI[e]	3.5.4.5	6.32247e-09	0	4.35534e-10	1.08251e-11	3.28532e-09	0	0	0	-1.42709e-10	1.22988e-08
r662	DC[e] -> NH3[e] + DU[e]	3.5.4.5	3.88775e-09	-4.2876e-10	2.52743e-10	0	2.01987e-09	1.10529e-10	1.62553e-09	0	-1.13118e-10	5.45488e-09
r663	H2O[c] + DUTP[c] -> PPI[c] + DUMP[c]	3.6.1.23	0.00395144	0.00395144	0.00395144	0.00395144	0.00395144	0.00395144	0.00395144	0.00395144	0.00395144	0
r664	H2O[m] + DUTP[m] -> PPI[m] + DUMP[m]	3.6.1.23	3.49587e-10	0	0	0	0	0	0	0	0	6.43096e-10
r665	METTHF[c] + DUMP[c] -> DHF[c] + DTMP[c]	2.1.1.45	0.00395144	0.00395144	0.00395144	0.00395144	0.00395144	0.00395144	0.00395144	0.00395144	0.00395144	0
r666	ATP[c] + UTP[c] + GLN[c] -> ADP[c] + PI[c] + GLU[c] + CTP[c]	6.3.4.2	0.0138389	0.0138389	0.0138389	0.0138389	0.0138389	0.0138389	0.0138389	0.0138389	0.0138389	-7.33221e-33
r667	R5P[c] + URA[c] <=> PURI5P[c]	4.2.1.70	0	0	0	0	0	0	0	0	0	0
r668	H2O[c] + DCMP[c] -> NH3[c] + DUMP[c]	3.5.4.12	0.00395144	0.00395144	0.00395144	0.00395144	0.00395144	0.00395144	0.00395144	0.00395144	0.00395144	0
r669	2 ATP[c] + HCO3[c] + GLN[c] -> 2 ADP[c] + PI[c] + GLU[c] + CAP[c]	6.3.5.5	0.11521	0.11521	0.11521	0.11521	0.11521	0.11521	0.11521	0.11521	0.11521	1.04127e-09
r670	2 ATP[e] + HCO3[e] + GLN[e] -> 2 ADP[e] + PI[e] + GLU[e] + CAP[e]	6.3.5.5	0	0	0	0	0	0	0	0	0	0
r671	2 ATP[m] + HCO3[m] + GLN[m] -> 2 ADP[m] + PI[m] + GLU[m] + CAP[m]	6.3.5.5	0	0	0	0	1.51133e-13	0	0	0	0	3.50296e-23
r672	H2O[c] + CYTS[c] -> NH3[c] + URA[c]	3.5.4.1	0	0	0	0	0	0	0	0	0	0
r673	H2O[m] + CYTS[m] -> NH3[m] + URA[m]	3.5.4.1	0	0	0	0	0	0	0	0	0	0
r674	NADPH[c] + OTHIO[c] -> NADP[c] + RTHIO[c]	1.8.1.9	0.0148573	0.0148573	0.0148573	0.0148573	0.0148573	0.0148573	0.0148573	0.0148573	0.0148573	6.52035e-09
r675	URI[c] + PI[c] <=> R1P[c] + URA[c]	2.4.2.3	3.55499e-09	-9.95584e-11	1.20768e-09	2.74375e-09	1.69549e-09	1.66364e-10	1.95487e-09	-3.18589e-09	-1.36387e-09	1.38049e-08
r676	DOROA[c] + FUM[c] <=> SUCC[c] + OROA[c]	1.3.98.1	0.0932432	0.0932432	0.0932432	0.0932432	0.0932432	0.0932432	0.0932432	0.0932432	0.0932432	4.64392e-09
r677	PRPP[c] + AD[c] -> AMP[c] + PPI[c]	2.4.2.7	3.55767e-09	7.18164e-10	1.20678e-09	2.63128e-09	1.69748e-09	1.1038e-09	1.93383e-09	-3.19596e-09	-2.66542e-09	1.68819e-08
r678	DIN[c] + PI[c] <=> HYXN[c] + DR1P[c]	2.4.2.1	0	0	0	0	0	0	0	0	0	0
r679	DA[c] + PI[c] <=> AD[c] + DR1P[c]	2.4.2.1	2.17656e-09	2.33876e-10	3.27333e-10	1.20315e-09	1.11515e-09	-5.13978e-10	2.30898e-09	-1.14147e-09	-7.87226e-10	6.31669e-09
r680	DG[c] + PI[c] <=> GN[c] + DR1P[c]	2.4.2.1	1.36383e-09	-2.02033e-09	2.05176e-10	7.53267e-10	6.97355e-10	7.91982e-11	8.12943e-10	-5.52461e-10	-4.93282e-10	1.14211e-09
r681	R1P[c] + HYXN[c] <=> PI[c] + INS[c]	2.4.2.1	0	0	0	0	0	0	0	0	0	0
r682	R1P[c] + AD[c] <=> PI[c] + ADN[c]	2.4.2.1	2.17656e-09	2.33876e-10	3.27333e-10	1.69936e-09	1.11515e-09	-5.13978e-10	2.30898e-09	-1.14147e-09	-7.87226e-10	6.5449e-09
r683	R1P[c] + XAN[c] <=> PI[c] + XTSINE[c]	2.4.2.1	1.2277e-09	-1.81581e-09	1.8224e-10	7.04517e-10	6.24141e-10	3.69517e-10	6.38352e-10	4.68265e-09	-4.54975e-10	-6.13591e-09
r684	PI[c] + GSN[c] <=> R1P[c] + GN[c]	2.4.2.1	1.7784e-09	3.5908e-10	1.38678e-10	1.29648e-09	8.49725e-10	7.68912e-10	9.66387e-10	-1.59801e-09	-1.75819e-09	8.68735e-09
r685	ATP[c] + ADN[c] -> ADP[c] + AMP[c]	2.7.1.20	0.00653208	0.00653208	0.00653208	0.00653208	0.00653208	0.00653208	0.00653208	0.00653208	0.00653208	1.51441e-08
r686	ATP[c] + AMP[c] <=> 2 ADP[c]	2.7.4.3	3.74601	4.56792	5.38982	6.21173	7.03364	7.85554	8.67745	9.49936	10.3213	-22.6796
r687	ATP[m] + AMP[m] <=> 2 ADP[m]	2.7.4.3	0	0	0	0	0	0	6.32141e-09	0	0	-5.8144e-09
r688	DATP[c] + DAMP[c] <=> 2 DADP[c]	2.7.4.3	0	0	0	0	0	0	0	0	0	0
r689	DATP[m] + DAMP[m] <=> 2 DADP[m]	2.7.4.3	0	0	0	0	0	0	0	0	0	0
r690	ATP[c] + DGDP[c] <=> ADP[c] + DGTP[c]	2.7.4.6	0.00318021	0.00318021	0.00318021	0.00318021	0.00318021	0.00318021	0.00318021	0.00318021	0.00318021	4.91437e-09
r691	ATP[m] + DGDP[m] <=> ADP[m] + DGTP[m]	2.7.4.6	0	0	0	0	0	0	0	0	0	0
r692	ATP[c] + DUDP[c] <=> ADP[c] + DUTP[c]	2.7.4.6	0.00395144	0.00395144	0.00395144	0.00395144	0.00395144	0.00395144	0.00395144	0.00395144	0.00395144	0
r693	ATP[m] + DUDP[m] <=> ADP[m] + DUTP[m]	2.7.4.6	0	0	0	0	0	0	0	0	0	0
r694	ATP[c] + DCDP[c] <=> ADP[c] + DCTP[c]	2.7.4.6	0.00327549	0.00327549	0.00327549	0.00327549	0.00327549	0.00327549	0.00327549	0.00327549	0.00327549	0
r695	ATP[m] + DCDP[m] <=> ADP[m] + DCTP[m]	2.7.4.6	0	0	0	0	0	0	0	0	0	0
r696	ATP[c] + DTDP[c] <=> ADP[c] + DTTP[c]	2.7.4.6	0.00395144	0.00395144	0.00395144	0.00395144	0.00395144	0.00395144	0.00395144	0.00395144	0.00395144	0
r697	ATP[m] + DTDP[m] <=> ADP[m] + DTTP[m]	2.7.4.6	0	0	0	0	0	0	0	0	0	0
r698	ATP[c] + DADP[c] <=> ADP[c] + DATP[c]	2.7.4.6	1000	1000	1000	1000	1000	1000	1000	1000	1000	0
r699	ATP[m] + DADP[m] <=> ADP[m] + DATP[m]	2.7.4.6	0	0	0	0	0	0	0	0	0	0
r700	ATP[c] + UDP[c] <=> ADP[c] + UTP[c]	2.7.4.6	0.133188	0.133188	0.133188	0.133188	0.133188	0.133188	0.133188	0.133188	0.133188	4.18934e-09
r701	ATP[m] + UDP[m] <=> ADP[m] + UTP[m]	2.7.4.6	0	0	0	0	0	0	0	0	0	0
r702	ATP[c] + CDP[c] <=> ADP[c] + CTP[c]	2.7.4.6	0.035917	0.035917	0.035917	0.035917	0.035917	0.035917	0.035917	0.035917	0.035917	2.68562e-10
r703	ATP[m] + CDP[m] <=> ADP[m] + CTP[m]	2.7.4.6	0	0	0	0	0	0	0	0	0	0
r704	ATP[c] + GDP[c] <=> ADP[c] + GTP[c]	2.7.4.6	0.28479	0.48479	0.68479	0.88479	1.08479	1.28479	1.48479	1.68479	1.88479	-5.51877
r705	GDP[m] + ATP[m] <=> GTP[m] + ADP[m]	2.7.4.6	3.73404e-10	0	5.68035e-11	8.28986e-11	1.97891e-10	2.49543e-11	1.80522e-10	0	0	5.99764e-10
r706	ATP[c] + IDP[c] <=> ADP[c] + ITP[c]	2.7.4.6	0	0	0	0	0	0	0	0	0	0
r707	ATP[m] + IDP[m] <=> ADP[m] + ITP[m]	2.7.4.6	0	0	0	0	0	0	0	0	0	0
r708	PRPP[c] + HYXN[c] -> PPI[c] + IMP[c]	2.4.2.8	1.62116e-09	3.59064e-10	1.3863e-10	7.64386e-10	7.74746e-10	4.26907e-10	9.6869e-10	-1.59833e-09	9.36175e-10	3.35242e-09
r709	PRPP[c] + GN[c] -> PPI[c] + GMP[c]	2.4.2.8	1.62116e-09	3.59064e-10	1.3863e-10	7.64386e-10	7.74746e-10	4.26907e-10	9.6869e-10	-1.59833e-09	9.36175e-10	3.35242e-09
r710	DUMP[c] -> PI[c] + DU[c]	3.1.3.5	0	0	0	0	0	0	0	0	0	0
r711	DTMP[c] -> PI[c] + DT[c]	3.1.3.5	0	0	0	0	0	0	0	0	0	0
r712	DAMP[c] -> PI[c] + DA[c]	3.1.3.5	2.20238e-09	2.49212e-10	3.27759e-10	2.91773e-09	1.11697e-09	-5.15342e-10	2.31512e-09	-1.14085e-09	3.3945e-10	5.09578e-09
r713	DGMP[c] -> PI[c] + DG[c]	3.1.3.5	1.37827e-09	-2.13856e-09	2.05119e-10	3.48791e-09	6.99168e-10	7.88691e-11	8.16948e-10	-2.96097e-10	2.12938e-10	6.06745e-10
r714	DCMP[c] -> PI[c] + DC[c]	3.1.3.5	0	0	0	0	0	0	0	0	0	0
r715	CMP[c] -> PI[c] + CYTD[c]	3.1.3.5	2.93973e-09	7.15963e-10	1.28009e-13	8.41862e-10	1.54761e-09	8.47557e-10	1.9556e-09	-3.18787e-09	1.86399e-09	5.56375e-09
r716	AMP[c] -> PI[c] + ADN[c]	3.1.3.5	4.31522e-09	7.17696e-10	1.28342e-13	1.70839e-09	1.54888e-09	1.6736e-10	1.93723e-09	-3.1878e-09	1.88062e-09	8.79402e-09
r717	GMP[c] -> PI[c] + GSN[c]	3.1.3.5	1.62116e-09	3.59064e-10	1.3863e-10	7.64386e-10	7.74746e-10	4.26907e-10	9.6869e-10	-1.59833e-09	9.36175e-10	3.35242e-09
r718	IMP[c] -> PI[c] + INS[c]	3.1.3.5	1.62116e-09	3.59064e-10	1.3863e-10	7.64386e-10	7.74746e-10	4.26907e-10	9.6869e-10	-1.59833e-09	9.36175e-10	3.35242e-09
r719	XMP[c] -> PI[c] + XTSINE[c]	3.1.3.5	0	0	0	0	0	0	0	0	0	0
r720	UMP[c] -> PI[c] + URI[c]	3.1.3.5	2.94094e-09	7.15963e-10	-4.87434e-10	8.73174e-10	1.54814e-09	8.48479e-10	1.9556e-09	-3.18742e-09	1.83816e-09	5.17839e-09
r721	DUMP[c] -> DU[c] + PI[c]	3.1.3.5	0	0	0	0	0	0	0	0	0	0
r722	DUMP[e] -> DU[e] + PI[e]	3.1.3.5	0	0	0	0	0	0	0	0	0	0
r723	ADP[c] + RTHIO[c] -> OTHIO[c] + DADP[c]	1.17.4.1	0.00445021	0.00445021	0.00445021	0.00445021	0.00445021	0.00445021	0.00445021	0.00445021	0.00445021	3.66557e-09
r724	GDP[c] + RTHIO[c] -> OTHIO[c] + DGDP[c]	1.17.4.1	0.00318021	0.0031802	0.00318021	0.00318021	0.00318021	0.00318021	0.00318021	0.00318021	0.00318021	5.44788e-10
r725	CDP[c] + RTHIO[c] -> OTHIO[c] + DCDP[c]	1.17.4.1	0.00722693	0.00722693	0.00722693	0.00722693	0.00722693	0.00722693	0.00722693	0.00722693	0.00722693	-7.33221e-33
r726	UDP[c] + RTHIO[c] -> OTHIO[c] + DUDP[c]	1.17.4.1	0.00395144	0.00395144	0.00395144	0.00395144	0.00395144	0.00395144	0.00395144	0.00395144	0.00395144	0
r727	ATP[c] + DTMP[c] <=> ADP[c] + DTDP[c]	2.7.4.9	0.00395144	0.00395144	0.00395144	0.00395144	0.00395144	0.00395144	0.00395144	0.00395144	0.00395144	0
r728	DTMP[b] + ATP[b] <=> ADP[b] + DTDP[b]	2.7.4.9	0	0	0	0	0	0	0	0	0	0
r729	ATP[c] + DCMP[c] <=> ADP[c] + DCDP[c]	2.7.4.14	0	0	0	0	0	0	0	0	0	0
r730	ATP[m] + DCMP[m] <=> ADP[m] + DCDP[m]	2.7.4.14	0	0	0	0	0	0	0	0	0	0
r731	ATP[c] + CMP[c] <=> ADP[c] + CDP[c]	2.7.4.14	3.29732e-10	0	9.55694e-11	4.18399e-11	1.09044e-10	1.08102e-10	9.05181e-11	2.39971e-10	1.14288e-10	3.94155e-11
r732	ATP[m] + CMP[m] <=> ADP[m] + CDP[m]	2.7.4.14	0	0	0	0	0	0	0	0	0	0
r733	ATP[c] + UMP[c] <=> ADP[c] + UDP[c]	2.7.4.14	0.0932432	0.0932432	0.0932432	0.0932432	0.0932432	0.0932432	0.0932432	0.0932432	0.0932432	0
r734	ATP[m] + UMP[m] <=> ADP[m] + UDP[m]	2.7.4.14	3.73404e-10	0	5.68035e-11	0	1.97891e-10	0	0	0	0	7.39158e-10
r735	H2O[c] + GDP[c] -> PI[c] + GMP[c]	3.6.1.42	2.20195e-09	5.25956e-10	1.13911e-10	-1.23294e-09	1.86966e-09	6.1813e-10	1.91788e-09	1.24935e-09	-7.57971e-11	6.81475e-10
r736	ATP[c] + 2 H2O[c] -> 2 PI[c] + AMP[c]	3.6.1.5	1.10191e-09	2.62978e-10	5.69214e-11	-6.2739e-10	9.36755e-10	3.03456e-10	9.5894e-10	6.24675e-10	-2.5937e-11	3.17979e-10
r737	COA[c] + H3MCOA[c] <=> ACCOA[c] + AACCOA[c]	2.3.3.10	507.01	506.491	505.971	505.451	504.932	504.412	503.892	503.373	502.853	14.3388
r738	COA[m] + H3MCOA[m] <=> ACCOA[m] + AACCOA[m]	2.3.3.10	-7.1773	-6.75767	-6.33803	-5.91839	-5.49875	-5.07912	-4.65948	-4.23984	-3.82021	-11.5794
r739	2 NADP[c] + COA[c] + MVL[c] <=> 2 NADPH[c] + H3MCOA[c]	1.1.1.34	-0.0391925	-0.0391925	-0.0391925	-0.0391925	-0.0391925	-0.0391925	-0.0391925	-0.0391925	-0.0391925	0
r740	ATP[c] + MVL[c] -> ADP[c] + PMVL[c]	2.7.1.36	0.0391925	0.0391925	0.0391925	0.0391925	0.0391925	0.0391925	0.0391925	0.0391925	0.0391925	0
r741	CTP[c] + MVL[c] -> CDP[c] + PMVL[c]	2.7.1.36	0.0391925	0.0391925	0.0391925	0.0391925	0.0391925	0.0391925	0.0391925	0.0391925	0.0391925	0
r742	GTP[c] + MVL[c] -> GDP[c] + PMVL[c]	2.7.1.36	0.0391925	0.0391925	0.0391925	0.0391925	0.0391925	0.0391925	0.0391925	0.0391925	0.0391925	0
r743	UTP[c] + MVL[c] -> UDP[c] + PMVL[c]	2.7.1.36	0.0391925	0.0391925	0.0391925	0.0391925	0.0391925	0.0391925	0.0391925	0.0391925	0.0391925	0
r744	ATP[c] + PMVL[c] -> ADP[c] + PPMVL[c]	2.7.4.2	0.0391925	0.0391925	0.0391925	0.0391925	0.0391925	0.0391925	0.0391925	0.0391925	0.0391925	0
r745	ATP[c] + PPMVL[c] -> ADP[c] + PI[c] + CO2[c] + IPPP[c]	4.1.1.33	0.0391925	0.0391925	0.0391925	0.0391925	0.0391925	0.0391925	0.0391925	0.0391925	0.0391925	0
r746	IPPP[c] <=> DMPP[c]	5.3.3.2	0.0130642	0.0130642	0.0130642	0.0130642	0.0130642	0.0130642	0.0130642	0.0130642	0.0130642	7.33221e-33
r747	IPPP[c] + DMPP[c] -> PPI[c] + GPP[c]	2.5.1.1	0.0130642	0.0130642	0.0130642	0.0130642	0.0130642	0.0130642	0.0130642	0.0130642	0.0130642	7.33221e-33
r748	IPPP[c] + GPP[c] -> PPI[c] + FPP[c]	2.5.1.10	0.0130642	0.0130642	0.0130642	0.0130642	0.0130642	0.0130642	0.0130642	0.0130642	0.0130642	7.33221e-33
r749	IPPP[c] + FPP[c] -> PPI[c] + GGPP[c]	2.5.1.29	0	0	0	0	0	0	0	0	0	0
r750	NADPH[c] + 2 FPP[c] -> NADP[c] + 2 PPI[c] + SQL[c]	2.5.1.21	0.00653208	0.00653208	0.00653208	0.00653208	0.00653208	0.00653208	0.00653208	0.00653208	0.00653208	3.6661e-33
r751	O2[b] + SQL[b] + NADPH[b] -> S23E[b] + NADP[b]	1.14.13.132	0	0	0	0	0	0	0	0	0	0
r752	O2[c] + SQL[c] + NADPH[c] -> S23E[c] + NADP[c]	1.14.13.132	0.00653208	0.00653208	0.00653208	0.00653208	0.00653208	0.00653208	0.00653208	0.00653208	0.00653208	3.6661e-33
r753	S23E[c] -> LNST[c]	5.4.99.7	0.00653208	0.00653208	0.00653208	0.00653208	0.00653208	0.00653208	0.00653208	0.00653208	0.00653208	3.6661e-33
r754	3 NADPH[c] + 3 O2[c] + LNST[c] -> 4 H2O[c] + 3 NADP[c] + FOR[c] + 44MACHL[c]	1.14.13.70	0.00653208	0.00653208	0.00653208	0.00653208	0.00653208	0.00653208	0.00653208	0.00653208	0.00653208	3.6661e-33
r755	NADPH[c] + 44MACHL[c] -> NADP[c] + 14MLNST[c]	1.3.1.70	0.00653208	0.00653208	0.00653208	0.00653208	0.00653208	0.00653208	0.00653208	0.00653208	0.00653208	3.6661e-33
r756	3 NADPH[c] + 3 O2[c] + 14MLNST[c] -> 3 NADP[c] + ICZYMST[c]	1.14.13.72	0.00653208	0.00653208	0.00653208	0.00653208	0.00653208	0.00653208	0.00653208	0.00653208	0.00653208	3.6661e-33
r757	NADP[c] + ICZYMST[c] -> CO2[c] + NADPH[c] + IIZYMST[c]	1.1.1.170	0.00653208	0.00653208	0.00653208	0.00653208	0.00653208	0.00653208	0.00653208	0.00653208	0.00653208	3.6661e-33
r758	NADPH[c] + IIZYMST[c] -> NADP[c] + ZYMST[c]	1.1.1.270	0.00653208	0.00653208	0.00653208	0.00653208	0.00653208	0.00653208	0.00653208	0.00653208	0.00653208	3.6661e-33
r759	ZYMST[c] -> DMSTL[c]	5.3.3.5	0	0	0	0	0	0	0	0	0	0
r760	SAM[c] + ZYMST[c] -> SAH[c] + FEST[c]	2.1.1.41	0.00653208	0.00653208	0.00653208	0.00653208	0.00653208	0.00653208	0.00653208	0.00653208	0.00653208	3.6661e-33
r761	FEST[c] -> EPST[c]	5.3.3.-	0.00653208	0.00653208	0.00653208	0.00653208	0.00653208	0.00653208	0.00653208	0.00653208	0.00653208	3.6661e-33
r762	NADPH[c] + O2[c] + EPST[c] -> NADP[c] + ERGOTRI[c]	1.3.3.-	0.00653208	0.00653208	0.00653208	0.00653208	0.00653208	0.00653208	0.00653208	0.00653208	0.00653208	3.6661e-33
r763	NADPH[c] + O2[c] + ERGOTRI[c] -> NADP[c] + ERGOTET[c]	1.14.14.-	0.00653208	0.00653208	0.00653208	0.00653208	0.00653208	0.00653208	0.00653208	0.00653208	0.00653208	3.6661e-33
r764	NADPH[c] + ERGOTET[c] -> NADP[c] + ERGOST[c]	1.3.1.71	0.00653208	0.00653208	0.00653208	0.00653208	0.00653208	0.00653208	0.00653208	0.00653208	0.00653208	3.6661e-33
r765	ERGOST[c] + 0.076 C160COA[c] + 0.312 C181COA[c] + 0.281 C182COA[c] + 0.317 C183COA[c] + 0.014 C180COA[c] -> COA[c] + ERGOSE[c]	2.3.1.26	0.00653208	0.00653208	0.00653208	0.00653208	0.00653208	0.00653208	0.00653208	0.00653208	0.00653208	9.2082e-10
r766	H2O[c] + ERGOSE[c] -> ERGOST[c] + 0.076 C160[c] + 0.312 C181[c] + 0.281 C182[c] + 0.317 C183[c] + 0.014 C180[c]	3.1.1.13	-6.49596e-10	6.36355e-10	-1.42373e-09	3.60357e-10	-6.92617e-10	-6.94534e-10	-8.69877e-10	4.47812e-10	-1.02195e-09	9.2082e-10
r767	S23E[c] -> CCANOL[c]	5.4.99.8	0	0	0	0	0	0	0	0	0	0
r768	SAM[c] + CCANOL[c] -> SAH[c] + MCCANOL[c]	2.1.1.41	0	0	0	0	0	0	0	0	0	0
r769	3 NADPH[b] + 3 O2[b] + MCCANOL[b] -> 3 NADP[b] + CCECNOL[b]	1.14.13.72	0	0	0	0	0	0	0	0	0	0
r770	CCECNOL[c] -> OBSFUL[c]	5.5.1.9	0	0	0	0	0	0	0	0	0	0
r771	3 NADPH[c] + 3 O2[c] + OBSFUL[c] -> 4 H2O[c] + 3 NADP[c] + FOR[c] + 45ERSOL[c]	1.14.13.70	0	0	0	0	0	0	0	0	0	0
r772	NADPH[b] + 45ERSOL[b] -> NADP[b] + MFEST[b]	1.3.1.70	0	0	0	0	0	0	0	0	0	0
r773	MFEST[b] -> MLEPNOL[b]	5.3.3.5	0	0	0	0	0	0	0	0	0	0
r774	3 NADPH[b] + 3 O2[b] + MLEPL[b] -> 3 NADP[b] + EPST[b]	1.14.13.72	0	0	0	0	0	0	0	0	0	0
r775	H2O[c] + MAGLY[c] -> GL[c] + 0.2720 C160[c] + 0.0051 C161[c] + 0.0304 C180[c] + 0.1534 C181[c] + 0.6673 C182[c] + 0.0404 C183[c]	3.1.1.23	0.00289717	0.00289717	0.00289717	0.00289717	0.00289717	0.00289717	0.00289717	0.00289717	0.00289717	1.77549e-09
r776	H2O[e] + TAGLY[e] -> DAGLY[e] + 0.3544 C160[e] + 0.3423 C181[e] + 0.1421 C182[e] + 0.1201 C183[e] + 0.041 C180[e]	3.1.1.3	1.4312e-10	0	-2.08629e-10	-1.2535e-11	-2.41206e-10	0	0	0	0	6.56209e-11
r777	H2O[c] + TAGLY[c] -> DAGLY[c] + 0.3544 C160[c] + 0.3423 C181[c] + 0.1421 C182[c] + 0.1201 C183[c] + 0.041 C180[c]	3.1.1.3	4.27833	4.31457	4.35081	4.38705	4.42329	4.45953	4.49577	4.53201	4.56825	-1
r778	TAGLY[c] + H2O[c] -> DAGLY[c] + 0.4710 C160ACP[c] + 0.0242 C161ACP[c] + 0.1535 C180ACP[c] + 0.5328 C181ACP[c] + 2.3362 C182ACP[c] + 0.1499 C183ACP[c]	3.1.1.3	0	0	0	0	0	0	0	0	0	0
r779	DAGLY[c] + H2O[c] -> MAGLY[c] + 0.2938 C160[c] + 0.3994 C181[c] + 0.1544 C182[c] + 0.1295 C183[c] + 0.0229 C180[c]	3.1.1.3	0.00289717	0.00289717	0.00289717	0.00289717	0.00289717	0.00289717	0.00289717	0.00289717	0.00289717	0
r780	DAGLY[b] + H2O[b] -> MAGLY[b] + 0.2938 C160[b] + 0.3994 C181[b] + 0.1544 C182[b] + 0.1295 C183[b] + 0.0229 C180[b]	3.1.1.3	0	0	0	0	0	0	0	0	0	0
r781	GL3P[c] + 0.2938 C160COA[c] + 0.3994 C181COA[c] + 0.1544 C182COA[c] + 0.1295 C183COA[c] + 0.0229 C180COA[c] -> COA[c] + DAGLYP[c]	2.3.1.15; 2.3.1.51	0.00289717	0.00289717	0.00289717	0.00289717	0.00289717	0.00289717	0.00289717	0.00289717	0.00289717	-5.00265e-11
r782	H2O[c] + DAGLYP[c] -> PI[c] + DAGLY[c]	3.1.3.4	0.00289717	0.00289717	0.00289717	0.00289717	0.00289717	0.00289717	0.00289717	0.00289717	0.00289717	-5.00265e-11
r783	DAGLY[c] + 0.3544 C160COA[c] + 0.3423 C181COA[c] + 0.1421 C182COA[c] + 0.1201 C183COA[c] + 0.041 C180COA[c] -> TAGLY[c] + COA[c]	2.3.1.20	4.88463	4.88463	4.88463	4.88463	4.88463	4.88463	4.88463	4.88463	4.88463	-6.79283e-11
r784	DAGLY[b] + 0.3544 C160COA[b] + 0.3423 C181COA[b] + 0.1421 C182COA[b] + 0.1201 C183COA[b] + 0.041 C180COA[b] -> TAGLY[b] + COA[b]	2.3.1.20	0	0	0	0	0	0	0	0	0	0
r785	DAGLY[c] + PC[c] -> TAGLY[c] + LPC[c]	2.3.1.158	-3.19862e-10	1.05163e-10	-2.67314e-10	1.17963e-10	1.8454e-10	1.03656e-10	1.15707e-10	1.44045e-10	-1.45867e-09	1.69556e-09
r786	GL[c] + NADP[c] <=> GLYN[c] + NADPH[c]	1.1.1.156	-3.31286e-10	1.92243e-10	-3.01816e-10	3.04284e-10	1.90807e-10	1.91567e-10	1.44607e-10	-1.62211e-10	-4.03245e-10	2.62634e-10
r787	GLYN[c] + ATP[c] -> T3P2[c] + ADP[c]	2.7.1.29	-3.31286e-10	1.92243e-10	-3.01816e-10	3.04284e-10	1.90807e-10	1.91567e-10	1.44607e-10	-1.62211e-10	-4.03245e-10	2.62634e-10
r788	ATP[c] + GL[c] -> ADP[c] + GL3P[c]	2.7.1.30	0.00289717	0.00289717	0.00289717	0.00289717	0.00289717	0.00289717	0.00289717	0.00289717	0.00289717	-1.06506e-14
r789	ATP[b] + GL[b] -> ADP[b] + GL3P[b]	2.7.1.30	0	0	0	0	0	0	0	0	0	0
r790	Q[c] + GL3P[c] -> T3P2[c] + QH2[c]	1.1.5.3	0	1.4087e-13	0	0	0	0	-8.11036e-13	1.24716e-13	-1.25955e-13	9.99979e-13
r791	NAD[c] + GL3P[c] -> T3P2[c] + NADH[c]	1.1.1.8	0	1.15654e-13	1.06869e-13	0	1.18332e-13	0	-2.86455e-13	1.16556e-13	-1.23235e-13	5.87234e-13
r792	SER[b] + C160COA[b] -> COA[b] + CO2[b] + DHSPH[b]	2.3.1.50	0	0	0	0	0	0	0	0	0	0
r793	SER[m] + C160COA[m] -> COA[m] + CO2[m] + DHSPH[m]	2.3.1.50	0	0	0	0	0	0	0	0	0	0
r794	SER[c] + C160COA[c] -> CO2[c] + COA[c] + DHSPH[c]	2.3.1.50	0	0	0	0	0	0	0	0	0	0
r795	NADPH[c] + DHSPH[c] -> NADP[c] + SPH[c]	1.1.1.102	0	0	0	0	0	0	0	0	0	0
r796	PSPH[b] + ACOA[b] -> CER3[b] + COA[b]	2.3.1.24	0	0	0	0	0	0	0	0	0	0
r797	SPH[b] + ACOA[b] -> CER2[b] + COA[b]	2.3.1.24	0	0	0	0	0	0	0	0	0	0
r798	SPGS[b] + ACOA[b] -> CER1[b] + COA[b]	2.3.1.24	0	0	0	0	0	0	0	0	0	0
r799	SPH[b] + 2 FERROB5[b] + O2[b] -> PSPH[b] + 2 FERRIB5[b] + H2O[b]	1.14.18.5	0	0	0	0	0	0	0	0	0	0
r800	CER2[b] + 2 FERROB5[b] + O2[b] -> CER3[b] + 2 FERRIB5[b] + H2O[b]	1.14.18.5	0	0	0	0	0	0	0	0	0	0
r801	CER2[b] + 2 FERROB5[b] + O2[b] -> CER1[b] + 2 FERRIB5[b + 2 H2O[b]	1.14.19.17	0	0	0	0	0	0	0	0	0	0
r802	H2O[b] + CER2[b] -> ACOOH[b] + SPH[b]	3.5.1.-	0	0	0	0	0	0	0	0	0	0
r803	H2O[e] + SPMYLIN[e] -> CER1[e] + PCHO[e]	3.1.4.12	0	0	0	0	0	0	0	0	0	0
r804	H2O[c] + SPMYLIN[c] -> CER1[c] + PCHO[c]	3.1.4.12	0	0	0	0	0	0	0	0	0	0
r805	UDPG[b] + CER1[b] -> UDP[b] + GLYLCR[b]	2.4.1.80	0	0	0	0	0	0	0	0	0	0
r806	NADPH[b] + O2[b] + PSPH[b] -> NADP[b] + 2 H2O[b] + C18PSPG[b]	1.14.19.4	0	0	0	0	0	0	0	0	0	0
r807	ATP[c] + SPH[c] -> ADP[c] + DHSP[c]	2.7.1.91	0	0	0	0	0	0	0	0	0	0
r808	ATP[m] + SPH[m] -> ADP[m] + DHSP[m]	2.7.1.91	0	0	0	0	0	0	0	0	0	0
r809	ATP[c] + PSPH[c] -> ADP[c] + PHSP[c]	2.7.1.91	0	0	0	0	0	0	0	0	0	0
r810	ATP[m] + PSPH[m] -> ADP[m] + PHSP[m]	2.7.1.91	0	0	0	0	0	0	0	0	0	0
r811	ATP[c] + SPSE[c] -> ADP[c] + SHSP[c]	2.7.1.91	0	0	0	0	0	0	0	0	0	0
r812	ATP[m] + SPSE[m] -> ADP[m] + SHSP[m]	2.7.1.91	0	0	0	0	0	0	0	0	0	0
r813	DHSP[m] -> PETHM[m] + C16A[m]	4.1.2.27	0	0	0	0	0	0	0	0	0	0
r814	PHSP[m] -> PETHM[m] + C16A[m]	4.1.2.27	0	0	0	0	0	0	0	0	0	0
r815	PHSP[b] -> PI[b] + PSPH[b]	3.1.3.-	0	0	0	0	0	0	0	0	0	0
r816	DHSP[b] -> PI[b] + SPH[b]	3.1.3.-	0	0	0	0	0	0	0	0	0	0
r817	SHSP[b] -> PI[b] + SPSE[b]	3.1.3.-	0	0	0	0	0	0	0	0	0	0
r818	CER3[e] + H2O[e] -> ACOOH[e] + PSPH[e]	3.5.1.23	0	0	0	0	0	0	0	0	0	0
r819	CER2[e] + H2O[e] -> ACOOH[e] + SPH[e]	3.5.1.23	0	0	0	0	0	0	0	0	0	0
r820	CER1[e] + H2O[e] -> ACOOH[e] + SPSE[e]	3.5.1.23	0	0	0	0	0	0	0	0	0	0
r821	GASCER[e] + H2O[e] -> GLAC[e] + CER1[e]	3.2.1.46	0	0	0	0	0	0	0	0	0	0
r822	SUFT[e] + H2O[e] -> GASCER[e] + SLF[e]	3.1.6.1	0	0	0	0	0	0	0	0	0	0
r823	DAGLYP[b] + CTP[b] -> PPI[b] + CLCDPDG[b]	2.7.7.41	0	0	0	0	0	0	0	0	0	0
r824	CLCDPDG[e] + GL3P[e] -> CMP[e] + CLPIGP[e]	2.7.8.5	0	0	0	0	0	0	0	0	0	0
r825	GL3P[m] + CLCDPDG[m] -> CMP[m] + CLPIGP[m]	2.7.8.5	0	0	0	0	0	0	0	-3.418e-13	0	4.71579e-13
r826	H2O[c] + CLPIGP[c] -> PI[c] + PG[c]	3.1.3.27	0	0	0	0	0	0	0	0	0	0
r827	CLCDPDG[b] + PG[b] -> CMP[b] + CL[b]	2.7.8.-	0	0	0	0	0	0	0	0	0	0
r828	T3P2[c] + 0.243 C160COA[c] + 0.264 C181COA[c] + 0.255 C182COA[c] + 0.209 C183COA[c] + 0.029 C180COA[c] -> COA[c] + AT3P2[c]	2.3.1.42	0.607769	0.571529	0.535289	0.499049	0.462809	0.426569	0.390329	0.354089	0.317849	1
r829	NADPH[c] + AT3P2[c] -> NADP[c] + LPA[c]	1.1.1.101	0.607769	0.571529	0.535289	0.499049	0.462809	0.426569	0.390329	0.354089	0.317849	1
r830	LPA[c] + 0.243 C160COA[c] + 0.264 C181COA[c] + 0.255 C182COA[c] + 0.209 C183COA[c] + 0.029 C180COA[c] -> COA[c] + PA[c]	2.3.1.51	0.607769	0.571529	0.535289	0.499049	0.462809	0.426569	0.390329	0.354089	0.317849	1
r831	H2O[c] + PA[c] -> PI[c] + DAGLY[c]	3.1.3.4	0.60739	0.57115	0.53491	0.49867	0.46243	0.42619	0.38995	0.35371	0.31747	1
r832	ATP[c] + DAGLY[c] -> ADP[c] + PA[c]	2.7.1.107	-1.68878e-09	7.9322e-10	-1.73955e-09	-2.09929e-09	-1.78034e-09	1.15165e-09	-2.07386e-09	6.39151e-10	-1.94916e-09	-4.9605e-10
r833	ATP[m] + DAGLY[m] -> ADP[m] + PA[m]	2.7.1.107	0	0	0	0	0	0	0	0	0	0
r834	DAGLY[c] + CDPETN[c] <=> CMP[c] + PE[c]	2.7.8.1	-4.28819e-10	0	0	0	-1.36102e-13	1.15981e-10	0	0	0	-8.4219e-10
r835	CTP[c] + PCHO[c] -> PPI[c] + CDPCHO[c]	2.7.7.15	0	0	0	0	0	0	0	0	0	0
r836	ATP[c] + CHO[c] -> ADP[c] + PCHO[c]	2.7.1.32	0	1.96465e-10	0	0	0	0	0	0	0	2.71061e-10
r837	SAM[b] + PE[b] -> SAH[b] + PMME[b]	2.1.1.17	0	0	0	0	0	0	0	0	0	0
r838	SAM[b] + POFA[b] -> SAH[b] + PMFA[b]	2.1.1.16	0	0	0	0	0	0	0	0	0	0
r839	H2O[c] + PC[c] -> 0.057 C160[c] + 0.211 C181[c] + 0.357 C182[c] + 0.361 C183[c] + 0.014 C180[c] + LPC[c]	3.1.1.4	-1.09658e-09	4.24472e-10	-1.11754e-09	-6.51247e-10	-1.13986e-09	3.44329e-10	-1.12302e-09	4.85436e-10	-1.18805e-09	-3.68678e-10
r840	H2O[c] + PC[c] -> 0.057 C160[c] + 0.211 C181[c] + 0.357 C182[c] + 0.361 C183[c] + 0.014 C180[c] + GLYCEROCHO[c]	3.1.1.4/3.1.1.5	-2.92009e-10	1.1359e-10	0	-8.86189e-11	-2.41115e-10	3.44329e-10	-1.5369e-10	4.508e-11	-1.45263e-10	-2.33179e-10
r841	LPC[c] + 0.057 C160COA[c] + 0.211 C181COA[c] + 0.357 C182COA[c] + 0.361 C183COA[c] + 0.014 C180COA[c] -> COA[c] + PC[c]	2.3.1.23	0.00176701	0.00176702	0.00176701	0.00176702	0.00176701	0.00176702	0.00176701	0.00176702	0.00176701	-1.41294e-10
r842	H2O[c] + PE[c] -> 0.1898 C160[c] + 0.3193 C181[c] + 0.2108 C182[c] + 0.2751 C183[c] + 0.005 C180[c] + LPE[c]	3.1.1.4	-1.26518e-09	4.01482e-10	-1.07673e-09	7.35811e-10	-1.32134e-09	6.10434e-10	-1.29303e-09	9.85409e-10	-1.47231e-09	-1.67992e-10
r843	LPE[c] + 0.1898 C160COA[c] + 0.3193 C181COA[c] + 0.2108 C182COA[c] + 0.2751 C183COA[c] + 0.005 C180COA[c] -> COA[c] + PE[c]	2.3.1.23	-1.26518e-09	4.01482e-10	-1.07673e-09	7.35811e-10	-1.32134e-09	6.10434e-10	-1.29303e-09	9.85409e-10	-1.47231e-09	-1.67992e-10
r844	H2O[c] + LPC[c] -> ACOOH[c] + GLYCEROCHO[c]	3.1.1.5	0	1.27416e-10	0	6.43332e-10	0	0	0	3.44671e-10	-1.6345e-10	2.96803e-10
r845	H2O[b] + LPC[b] -> ACOOH[b] + GLYCEROCHO[b]	3.1.1.5	0	0	0	0	0	0	0	0	0	0
r846	H2O[c] + LPE[c] -> ACOOH[c] + GLYCEROETM[c]	3.1.1.5	0	0	-1.11757e-09	0	0	8.27888e-11	0	0	0	-1.06601e-09
r847	H2O[b] + LPE[b] -> ACOOH[b] + GLYCEROETM[b]	3.1.1.5	0	0	0	0	0	0	0	0	0	0
r848	H2O[m] + PC[m] -> PA[m] + CHO[m]	3.1.4.4	0	0	0	0	0	0	0	0	0	0
r849	H2O[b] + PC[b] -> CHO[b] + PA[b]	3.1.4.4	0	0	0	0	0	0	0	0	0	0
r850	H2O[c] + PC[c] -> CHO[c] + PA[c]	3.1.4.4	0	0	0	0	0	0	0	0	0	0
r851	CTP[b] + PA[b] <=> CDPDG[b] + PPI[b]	2.7.7.41	0	0	0	0	0	0	0	0	0	0
r852	CTP[c] + PETHM[c] -> PPI[c] + CDPETN[c]	2.7.7.14	0	0	0	0	0	8.27888e-11	0	0	0	-3.80743e-11
r853	CDPDG[b] + SER[b] <=> CMP[b] + PS[b]	2.7.8.8	0	0	0	0	0	0	0	0	0	0
r854	SER[b] + PE[b] -> PS[b] + ETHAM[b]	2.7.8.29	0	0	0	0	0	0	0	0	0	0
r855	ATP[c] + ETHAM[c] -> ADP[c] + PETHM[c]	2.7.1.82	0	0	0	0	0	8.27888e-11	0	0	0	-3.80743e-11
r856	PS[c] -> CO2[c] + PE[c]	4.1.1.65	0.00236341	0.00236341	0.00236341	0.00236341	0.00236341	0.00236341	0.00236341	0.00236341	0.00236341	0
r857	SAM[b] + PMME[b] -> SAH[b] + PDME[b]	2.1.1.71	0	0	0	0	0	0	0	0	0	0
r858	SAM[b] + PDME[b] -> SAH[b] + PC[b]	2.1.1.71	0	0	0	0	0	0	0	0	0	0
r859	0.2827 C160COA[c] + 0.3435 C181COA[c] + 0.1388 C182COA[c] + 0.2239 C183COA[c] + 0.0111 C180COA[c] + ACGLPE[c] -> COA[c] + PS[c]		0.0025308	0.0025308	0.0025308	0.0025308	0.0025308	0.0025308	0.0025308	0.0025308	0.0025308	0
r860	0.5488 C160COA[c] + 0.0222 C180COA[c] + 0.2336 C181COA[c] + 0.1450 C182COA[c] + 0.0504 C183COA[c] -> PINS[c] + COA[c]		5.15472e-05	5.15472e-05	5.15472e-05	5.15472e-05	5.15472e-05	5.15472e-05	5.15472e-05	5.15472e-05	5.15472e-05	2.86414e-35
r861	ACCOA[b] + LYSOPAF[b] -> COA[b] + PAF[b]	2.3.1.23; 2.3.1.67	0	0	0	0	0	0	0	0	0	0
r862	ATP[c] + HCO3[c] + BCCP[c] -> ADP[c] + PI[c] + CBCCP[c]	6.3.4.14	0	0	0	0	0	0	0	0	0	0
r863	ATP[c] + HCO3[c] + ACCOA[c] -> ADP[c] + PI[c] + MALCOA[c]	6.4.1.2	12.3171	11.5865	10.8559	10.1254	9.39483	8.66427	7.93371	7.20315	6.47259	20.1589
r864	ACCOA[c] + ACP[c] -> COA[c] + ACACP[c]	2.3.1.38	0	0	0	0	0	0	0	0	0	0
r865	MALCOA[m] + ACP[m] -> COA[m] + MALACP[m]	2.3.1.39	0	0	0	0	0	0	1.51363e-11	0	0	-1.39223e-11
r866	MALCOA[c] + ACP[c] <=> MALACP[c] + COA[c]	2.3.1.39	-5.80258e-10	1.70821e-10	-3.78478e-10	1.97247e-10	1.15051e-10	3.4798e-10	1.29904e-10	1.76884e-10	-3.60945e-10	-9.48738e-10
r867	ACACP[c] + MALACP[c] -> AACACP[c] + CO2[c] + ACP[c]	2.3.1.41	0	0	0	0	0	0	8.63185e-11	0	0	-7.93953e-11
r868	AACACP[c] + NADPH[c] <=> C4HACP[c] + NADP[c]	1.1.1.100	0	0	0	0	0	0	8.63185e-11	0	0	-7.93953e-11
r869	AACACP[m] + NADPH[m] <=> C4HACP[m] + NADP[m]	1.1.1.100	0	0	0	0	0	0	0	0	0	0
r870	C4HACP[c] <=> C4DACP[c] + H2O[c]	4.2.1.59	0	0	0	0	0	0	8.63185e-11	0	0	-7.93953e-11
r871	C4DACP[c] + NADH[c] <=> C40ACP[c] + NAD[c]	1.3.1.9	0	0	0	0	0	0	8.63185e-11	0	0	-7.93953e-11
r872	ACCOA[c] + MALCOA[c] + 2 NADPH[c] -> C40COA[c] + COA[c] + 2 NADP[c] + CO2[c]	2.3.1.86	1.83266	1.72395	1.61523	1.50652	1.3978	1.28908	1.18037	1.07165	0.962934	2.9999
r873	ACCOA[m] + MALCOA[m] + 2 NADPH[m] -> C40COA[m] + COA[m] + 2 NADP[m] + CO2[m]	2.3.1.86	0	0	0	0	0	0	0	0	0	0
r874	C40ACP[c] + MALACP[c] -> C6OACP[c] + CO2[c] + ACP[c]	2.3.1.41	0	0	0	0	0	0	0	0	0	0
r875	C6OACP[c] + NADPH[c] <=> C6HACP[c] + NADP[c]	1.1.1.100	0	0	0	0	0	0	0	0	0	0
r876	C6OACP[m] + NADPH[m] <=> C6HACP[m] + NADP[m]	1.1.1.100	0	0	0	0	0	0	0	0	0	0
r877	C6HACP[c] <=> C6DACP[c] + H2O[c]	4.2.1.59	0	0	0	0	0	0	0	0	0	0
r878	C6DACP[c] + NADH[c] <=> C60ACP[c] + NAD[c]	1.3.1.9	0	0	0	0	0	0	0	0	0	0
r879	C40COA[c] + MALCOA[c] + 2 NADPH[c] -> C60COA[c] + COA[c] + 2 NADP[c] + CO2[c]	2.3.1.86	1.83266	1.72395	1.61523	1.50652	1.3978	1.28908	1.18037	1.07165	0.962934	2.9999
r880	C40COA[m] + MALCOA[m] + 2 NADPH[m] -> C60COA[m] + COA[m] + 2 NADP[m] + CO2[m]	2.3.1.86	0	0	0	0	0	0	0	0	0	0
r881	C60ACP[c] + MALACP[c] -> C8OACP[c] + CO2[c] + ACP[c]	2.3.1.41	0	0	0	0	0	0	0	0	0	0
r882	C8OACP[c] + NADPH[c] <=> C8HACP[c] + NADP[c]	1.1.1.100	0	0	0	0	0	0	0	0	0	0
r883	C8OACP[m] + NADPH[m] <=> C8HACP[m] + NADP[m]	1.1.1.100	0	0	0	0	0	0	0	0	0	0
r884	C8HACP[c] <=> C8DACP[c] + H2O[c]	4.2.1.59	0	0	0	0	0	0	0	0	0	0
r885	C8DACP[c] + NADH[c] <=> C80ACP[c] + NAD[c]	1.3.1.9	0	0	0	0	0	0	0	0	0	0
r886	C60COA[c] + MALCOA[c] + 2 NADPH[c] -> C80COA[c] + COA[c] + 2 NADP[c] + CO2[c]	2.3.1.86	1.83266	1.72395	1.61523	1.50652	1.3978	1.28908	1.18037	1.07165	0.962934	2.9999
r887	C60COA[m] + MALCOA[m] + 2 NADPH[m] -> C80COA[m] + COA[m] + 2 NADP[m] + CO2[m]	2.3.1.86	0	0	0	0	0	0	0	0	0	0
r888	C80ACP[c] + MALACP[c] -> C10OACP[c] + CO2[c] + ACP[c]	2.3.1.41	0	0	0	0	0	0	0	0	0	0
r889	C10OACP[c] + NADPH[c] <=> C10HACP[c] + NADP[c]	1.1.1.100	0	0	0	0	0	0	0	0	0	0
r890	C10OACP[m] + NADPH[m] <=> C10HACP[m] + NADP[m]	1.1.1.100	0	0	0	0	0	0	0	0	0	0
r891	C10HACP[c] <=> C10DACP[c] + H2O[c]	4.2.1.59	0	0	0	0	0	0	0	0	0	0
r892	C10DACP[c] + NADH[c] <=> C100ACP[c] + NAD[c]	1.3.1.9	0	0	0	0	0	0	0	0	0	0
r893	C80COA[c] + MALCOA[c] + 2 NADPH[c] -> C100COA[c] + COA[c] + 2 NADP[c] + CO2[c]	2.3.1.86	1.83266	1.72395	1.61523	1.50652	1.3978	1.28908	1.18037	1.07165	0.962934	2.9999
r894	C80COA[m] + MALCOA[m] + 2 NADPH[m] -> C100COA[m] + COA[m] + 2 NADP[m] + CO2[m]	2.3.1.86	0	0	0	0	0	0	0	0	0	0
r895	C100ACP[c] + MALACP[c] -> C12OACP[c] + CO2[c] + ACP[c]	2.3.1.41	0	0	0	0	0	0	0	0	0	0
r896	C12OACP[c] + NADPH[c] <=> C12HACP[c] + NADP[c]	1.1.1.100	0	0	0	0	0	0	0	0	0	0
r897	C12OACP[m] + NADPH[m] <=> C12HACP[m] + NADP[m]	1.1.1.100	0	0	0	0	0	0	0	0	0	0
r898	C12HACP[c] <=> C12DACP[c] + H2O[c]	4.2.1.59	0	0	0	0	0	0	0	0	0	0
r899	C12DACP[c] + NADH[c] <=> C120ACP[c] + NAD[c]	1.3.1.9	0	0	0	0	0	0	0	0	0	0
r900	C100COA[c] + MALCOA[c] + 2 NADPH[c] -> C120COA[c] + COA[c] + 2 NADP[c] + CO2[c]	2.3.1.86	1.83266	1.72395	1.61523	1.50652	1.3978	1.28908	1.18037	1.07165	0.962934	2.9999
r901	C100COA[m] + MALCOA[m] + 2 NADPH[m] -> C120COA[m] + COA[m] + 2 NADP[m] + CO2[m]	2.3.1.86	0	0	0	0	0	0	0	0	0	0
r902	C120ACP[c] + MALACP[c] -> C14OACP[c] + CO2[c] + ACP[c]	2.3.1.41	0	0	0	0	0	0	0	0	0	0
r903	C14OACP[c] + NADPH[c] <=> C14HACP[c] + NADP[c]	1.1.1.100	0	0	0	0	0	0	0	0	0	0
r904	C14OACP[m] + NADPH[m] <=> C14HACP[m] + NADP[m]	1.1.1.100	0	0	0	0	0	0	0	0	0	0
r905	C14HACP[c] <=> C14DACP[c] + H2O[c]	4.2.1.59	0	0	0	0	0	0	0	0	0	0
r906	C14DACP[c] + NADH[c] <=> C140ACP[c] + NAD[c]	1.3.1.9	0	0	0	0	0	0	0	0	0	0
r907	H2O[c] + C140ACP[c] <=> ACP[c] + C140[c]	3.1.2.14	0	0	0	0	0	0	0	0	0	0
r908	C120COA[c] + MALCOA[c] + 2 NADPH[c] -> C140COA[c] + COA[c] + 2 NADP[c] + CO2[c]	2.3.1.86	2.59791e-11	2.27787e-11	-9.31833e-11	-3.49875e-10	-2.25526e-11	-4.25376e-11	5.44644e-11	-3.59837e-11	-6.32641e-11	-3.19048e-11
r909	C120COA[m] + MALCOA[m] + 2 NADPH[m] -> C140COA[m] + COA[m] + 2 NADP[m] + CO2[m]	2.3.1.86	4.84968e-12	4.18221e-12	-1.60214e-11	-5.38696e-11	-5.77538e-13	-8.97837e-12	-2.55129e-12	-8.01847e-12	-1.47429e-11	1.98403e-11
r910	C140ACP[c] + MALACP[c] -> C16OACP[c] + CO2[c] + ACP[c]	2.3.1.41	6.1341e-12	-3.89377e-12	-2.77334e-13	-5.53961e-11	1.00364e-13	-1.12592e-11	1.21254e-11	-2.71425e-11	-1.56466e-11	4.04372e-11
r911	C16OACP[c] + NADPH[c] <=> C16HACP[c] + NADP[c]	1.1.1.100	6.1341e-12	-3.89377e-12	-2.77334e-13	-5.53961e-11	1.00364e-13	-1.12592e-11	1.21254e-11	-2.71425e-11	-1.56466e-11	4.04372e-11
r912	C16OACP[m] + NADPH[m] <=> C16HACP[m] + NADP[m]	1.1.1.100	0	0	0	0	0	0	0	0	0	0
r913	C16HACP[c] <=> C16DACP[c] + H2O[c]	4.2.1.59	0	0	0	0	0	0	0	0	0	0
r914	C16DACP[c] + NADH[c] <=> C160ACP[c] + NAD[c]	1.3.1.9	0	0	0	0	0	0	0	0	0	0
r915	H2O[c] + C160ACP[c] <=> ACP[c] + C160[c]	3.1.2.14	-1.51788	-1.53072	-1.54357	-1.55641	-1.56925	-1.5821	-1.59494	-1.60778	-1.62063	0.3544
r916	ATP[c] + COA[c] + C160[c] -> AMP[c] + PPI[c] + C160COA[c]	6.2.1.3	-1.01802e-09	3.20254e-10	-8.65839e-10	1.53696e-10	-1.06012e-09	4.87565e-10	-1.04257e-09	2.27835e-10	-3.17391e-11	-1.67783e-09
r917	ATP[m] + COA[m] + C160[m] -> AMP[m] + PPI[m] + C160COA[m]	6.2.1.3	-1.74005e-10	0	0	2.08792e-10	0	0	0	-5.66192e-11	0	-1.45959e-10
r918	ATP[b] + COA[b] + C160[b] -> AMP[b] + PPI[b] + C160COA[b]	6.2.1.3	0	0	0	0	0	0	0	0	0	0
r919	C40[b] + COA[b]+ ATP[b] -> C40COA[b] + H2O[b] + PPI[b] + AMP[b]	6.2.1.3	0	0	0	0	0	0	0	0	0	0
r920	C140COA[c] + MALCOA[c] + 2 NADPH[c] -> C160COA[c] + COA[c] + 2 NADP[c] + CO2[c]	2.3.1.86	1.83266	1.72395	1.61523	1.50652	1.3978	1.28908	1.18037	1.07165	0.962934	2.9999
r921	C140COA[m] + MALCOA[m] + 2 NADPH[m] -> C160COA[m] + COA[m] + 2 NADP[m] + CO2[m]	2.3.1.86	0	0	0	-1.07947e-10	-1.27865e-10	0	-8.51252e-11	0	0	2.86532e-11
r922	C160ACP[c] + MALACP[c] -> C18OACP[c] + CO2[c] + ACP[c]	2.3.1.41	2.1781e-10	6.58886e-11	-3.78478e-10	4.50191e-10	-5.19225e-10	-6.08438e-11	1.14483e-10	-9.65201e-11	-4.45973e-10	1.22676e-09
r923	C18OACP[c] + NADPH[c] <=> C18HACP[c] + NADP[c]	1.1.1.100	2.1781e-10	6.58886e-11	-3.78478e-10	4.50191e-10	-5.19225e-10	-6.08438e-11	1.14483e-10	-9.65201e-11	-4.45973e-10	1.22676e-09
r924	C18OACP[m] + NADPH[m] <=> C18HACP[m] + NADP[m]	1.1.1.100	0	0	0	0	0	0	0	0	0	0
r925	C18HACP[c] <=> C18DACP[c] + H2O[c]	4.2.1.59	2.1781e-10	6.58886e-11	-3.78478e-10	4.50191e-10	-5.19225e-10	-6.08438e-11	1.14483e-10	-9.65201e-11	-4.45973e-10	1.22676e-09
r926	C18DACP[c] + NADH[c] <=> C180ACP[c] + NAD[c]	1.3.1.9	2.1781e-10	6.58886e-11	-3.78478e-10	4.50191e-10	-5.19225e-10	-6.08438e-11	1.14483e-10	-9.65201e-11	-4.45973e-10	1.22676e-09
r927	H2O[c] + C180ACP[c] <=> ACP[c] + C180[c]	3.1.2.14	-0.175566	-0.177052	-0.178538	-0.180023	-0.181509	-0.182995	-0.184481	-0.185967	-0.187453	0.041
r928	C160COA[c] + MALCOA[c] + 2 NADPH[c] -> C180COA[c] + COA[c] + 2 NADP[c] + CO2[c]	2.3.1.86	3.19501e-10	1.59562e-10	-4.21185e-10	-3.06443e-10	-5.23321e-10	-2.36697e-10	-3.43382e-10	-9.94609e-11	-4.45539e-10	1.66109e-09
r929	C160COA[m] + MALCOA[m] + 2 NADPH[m] -> C180COA[m] + COA[m] + 2 NADP[m] + CO2[m]	2.3.1.86	6.38536e-11	2.36282e-11	-6.37754e-11	-6.10871e-11	-1.04674e-10	-4.76554e-11	-6.86964e-11	-1.98972e-11	-8.8647e-11	3.38939e-10
r930	C160COA[c] + NADH[c] + O2[c] -> C161COA[c] + NAD[c] + 2 H2O[c]	1.14.19.1	0	0	0	0	0	0	0	0	0	0
r931	C160COA[b] + NADH[b] + O2[b] -> C161COA[b] + NAD[b] + 2 H2O[b]	1.14.19.1	0	0	0	0	0	0	0	0	0	0
r932	C180COA[c] + NADH[c] + O2[c] -> C181COA[c] + NAD[c] + 2 H2O[c]	1.14.19.1	1.26082	1.18615	1.11147	1.0368	0.962129	0.887456	0.812784	0.738111	0.663439	2.0605
r933	C180COA[b] + NADH[b] + O2[b] -> C181COA[b] + NAD[b] + 2 H2O[b]	1.14.19.1	0	0	0	0	0	0	0	0	0	0
r934	C181COA[c] + NADH[c] + O2[c] -> C182COA[c] + NAD[c] + 2 H2O[c]	1.14.19.6	0.729086	0.685953	0.64282	0.599687	0.556554	0.513422	0.470289	0.427156	0.384023	1.1902
r935	C181COA[b] + NADH[b] + O2[b] -> C182COA[b] + NAD[b] + 2 H2O[b]	1.14.19.6	0	0	0	0	0	0	0	0	0	0
r936	C182COA[c] + NADH[c] + O2[c] -> C183COA[c] + NAD[c] + 2 H2O[c]	1.14.19.6	0.330142	0.310642	0.291141	0.27164	0.25214	0.232639	0.213138	0.193637	0.174137	0.5381
r937	C182COA[b] + NADH[b] + O2[b] -> C183COA[b] + NAD[b] + 2 H2O[b]	1.14.19.6	0	0	0	0	0	0	0	0	0	0
r938	ATP[c] + COA[c] + C161[c] -> AMP[c] + PPI[c] + C161COA[c]	6.2.1.3	1.47756e-05	1.47756e-05	1.47756e-05	1.47756e-05	1.47756e-05	1.47756e-05	1.47756e-05	1.47756e-05	1.47756e-05	-5.13165e-12
r939	COA[m] + ATP[m] + C161[m] -> PPI[m] + AMP[m] + C161COA[m]	6.2.1.3	0	0	0	0	0	0	0	0	0	0
r940	ATP[b] + COA[b] + C161[b] -> AMP[b] + PPI[b] + C161COA[b]	6.2.1.3	0	0	0	0	0	0	0	0	0	0
r941	ATP[c] + COA[c] + C181[c] -> AMP[c] + PPI[c] + C181COA[c]	6.2.1.3	1.46607	1.47848	1.49088	1.50329	1.51569	1.5281	1.5405	1.55291	1.56531	-0.3423
r942	COA[m] + ATP[m] + C181[m] -> PPI[m] + AMP[m] + C181COA[m]	6.2.1.3	0	0	0	0	0	0	0	0	0	0
r943	ATP[b] + COA[b] + C181[b] -> AMP[b] + PPI[b] + C181COA[b]	6.2.1.3	0	0	0	0	0	0	0	0	0	0
r944	ATP[c] + COA[c] + C182[c] -> AMP[c] + PPI[c] + C182COA[c]	6.2.1.3	0.610331	0.615481	0.62063	0.62578	0.63093	0.636079	0.641229	0.646379	0.651529	-0.1421
r945	COA[m] + ATP[m] + C182[m] -> PPI[m] + AMP[m] + C182COA[m]	6.2.1.3	0	0	0	0	0	0	0	0	0	0
r946	ATP[b] + COA[b] + C182[b] -> AMP[b] + PPI[b] + C182COA[b]	6.2.1.3	0	0	0	0	0	0	0	0	0	0
r947	ATP[c] + COA[c] + C183[c] -> AMP[c] + PPI[c] + C183COA[c]	6.2.1.3	0.514319	0.518672	0.523024	0.527377	0.531729	0.536081	0.540434	0.544786	0.549139	-0.1201
r948	COA[m] + ATP[m] + C183[m] -> PPI[m] + AMP[m] + C183COA[m]	6.2.1.3	0	0	0	0	0	0	-7.96307e-13	0	0	7.32439e-13
r949	ATP[b] + COA[b] + C183[b] -> AMP[b] + PPI[b] + C183COA[b]	6.2.1.3	0	0	0	0	0	0	0	0	0	0
r950	0.2720 C160COA[c] + 0.0051 C161COA[c] + 0.0304 C180COA[c] + 0.1534 C181COA[c] + 0.6673 C182COA[c] + 0.0404 C183COA[c] -> FFA[c] + COA[c]		0.00289717	0.00289717	0.00289717	0.00289717	0.00289717	0.00289717	0.00289717	0.00289717	0.00289717	0
r951	C40COA[m] + ACCOA[m] -> COA[m] + C60COA[m]	2.3.1.16	1000	1000	1000	1000	1000	1000	1000	1000	1000	0
r952	NADH[m] + C60COA[m] <=> NAD[m] + C6HCOA[m]	1.1.1.35	1000	1000	1000	1000	1000	1000	1000	1000	1000	-4.59892e-10
r953	C6HCOA[c] <=> C6DCOA[c]	4.2.1.74	1000	1000	1000	1000	1000	1000	1000	1000	1000	0
r954	C6HCOA[m] <=> C6DCOA[m]	4.2.1.17	1000	1000	1000	1000	1000	1000	1000	1000	1000	0
r955	C6DCOA[m] + NADP[m] -> C60COA[m]+ NADPH[m]	1.3.1.38	0	0	0	0	0	-4.54747e-13	0	0	0	2.09137e-13
r956	C60COA[m] + ACCOA[m] -> COA[m] + C80COA[m]	2.3.1.16	1000	1000	1000	1000	1000	1000	1000	1000	1000	0
r957	NADH[m] + C80COA[m] <=> NAD[m] + C8HCOA[m]	1.1.1.35	1000	1000	1000	1000	1000	1000	1000	1000	1000	0
r958	C8HCOA[c] <=> C8DCOA[c]	4.2.1.74	0	0	0	0	0	0	0	0	0	0
r959	C8HCOA[m] <=> C8DCOA[m]	4.2.1.17	0	0	0	0	0	0	0	0	0	0
r960	C8DCOA[m] + NADP[m] -> C80COA[m]+ NADPH[m]	1.3.1.38	0	0	0	0	0	0	0	0	0	0
r961	C80COA[p] + ACCOA[p] -> COA[p] + C100COA[p]	2.3.1.16	0	0	0	0	0	0	0	0	0	0
r962	NADH[m] + C100COA[m] <=> NAD[m] + C10HCOA[m]	1.1.1.35	0	0	0	1.03695e-13	0	0	0	0	-1.70197e-13	3.60782e-13
r963	C10HCOA[c] <=> C10DCOA[c]	4.2.1.74	1000	1000	1000	1000	1000	1000	1000	1000	1000	0
r964	C10HCOA[m] <=> C10DCOA[m]	4.2.1.17	1000	1000	1000	1000	1000	1000	1000	1000	1000	0
r965	C10DCOA[m] + NADP[m] -> C100COA[m]+ NADPH[m]	1.3.1.38	0	0	0	1.26841e-13	0	0	0	0	-1.70197e-13	3.71427e-13
r966	C100COA[m] + ACCOA[m] -> COA[m] + C120COA[m]	2.3.1.16	0	0	0	0	0	0	0	0	0	0
r967	NADH[m] + C120COA[m] <=> NAD[m] + C120HCOA[m]	1.1.1.35	-1.67644e-13	0	0	0	-1.77636e-13	0	0	0	-1.69864e-13	4.08471e-15
r968	C120HCOA[c] <=> C120DCOA[c]	4.2.1.74	0	0	0	0	0	0	0	0	0	0
r969	C120HCOA[m] <=> C120DCOA[m]	4.2.1.17	-1.67644e-13	0	0	0	-1.77636e-13	0	0	0	-1.69864e-13	4.08471e-15
r970	C120DCOA[m] + NADP[m] -> C120COA[m]+ NADPH[m]	1.3.1.38	-1.67644e-13	0	0	0	-1.77636e-13	0	0	0	-1.69864e-13	4.08471e-15
r971	C120COA[m] + ACCOA[m] -> COA[m] + C140COA[m]	2.3.1.16	1.83266	1.72395	1.61523	1.50652	1.3978	1.28908	1.18037	1.07165	0.962934	2.9999
r972	NADH[m] + C140COA[m] <=> NAD[m] + C140HCOA[m]	1.1.1.35	-1.6763e-13	0	-1.4011e-13	0	0	0	0	0	-1.7164e-13	-1.21495e-13
r973	C140HCOA[c] <=> C140DCOA[c]	4.2.1.74	0	0	0	0	0	0	0	0	0	0
r974	C140HCOA[m] <=> C140DCOA[m]	4.2.1.17	-1.6763e-13	0	-1.4011e-13	0	0	0	0	0	-1.7164e-13	-1.21495e-13
r975	C140DCOA[m] + NADP[m] -> C140COA[m]+ NADPH[m]	1.3.1.38	-1.6763e-13	0	-1.4011e-13	0	0	0	0	0	-1.7164e-13	-1.21495e-13
r976	C140COA[p] + ACCOA[p] -> COA[p] + C160COA[p]	2.3.1.16	0	0	0	0	0	0	0	0	0	0
r977	NADH[m] + C160COA[m] <=> NAD[m] + C160HCOA[m]	1.1.1.35	0	0	0	0	0	0	-1.72973e-13	0	0	1.59099e-13
r978	C160HCOA[c] <=> C160DCOA[c]	4.2.1.74	0	0	0	0	0	0	0	0	0	0
r979	C160HCOA[m] <=> C160DCOA[m]	4.2.1.17	0	0	0	0	0	0	-1.72973e-13	0	0	1.59099e-13
r980	C160DCOA[m] + NADP[m] -> C160COA[m]+ NADPH[m]	1.3.1.38	0	0	0	0	0	0	-1.72973e-13	0	0	1.59099e-13
r981	C160COA[c] + H2O[c] -> C160[c] + COA[c]	3.1.2.22	998.482	998.469	998.456	998.444	998.431	998.418	998.405	998.392	998.379	0.3544
r982	C160COA[c] + MALCOA[c] -> COA[c] + CO2[c] + C180COA[c]	2.3.1.199	1.32107	1.24281	1.16455	1.08629	1.00803	0.929772	0.851512	0.773251	0.694991	2.1595
r983	C120COA[c] + CAR[c] <=> C120CAR[c] + COA[c]	2.3.1.7	1.83266	1.72395	1.61523	1.50652	1.3978	1.28908	1.18037	1.07165	0.962934	2.9999
r984	C120COA[m] + CAR[m] <=> C120CAR[m] + COA[m]	2.3.1.7	998.167	998.276	998.385	998.493	998.602	998.711	998.82	998.928	999.037	-2.9999
r985	C120COA[b] + CAR[b] <=> C120CAR[b] + COA[b]	2.3.1.7	0	0	0	0	0	0	0	0	0	0
r986	C120CAR[c] + CAR[m] <=> C120CAR[m] + CAR[c]		1.83266	1.72395	1.61523	1.50652	1.3978	1.28908	1.18037	1.07165	0.962934	2.9999
r987	C120CAR[m] + COA[m] <=> C120COA[m] + CAR[m]	2.3.1.7	1000	1000	1000	1000	1000	1000	1000	1000	1000	0
r988	C140COA[c] + CAR[c] <=> C140CAR[c] + COA[c]	2.3.1.7	-1.83266	-1.72395	-1.61523	-1.50652	-1.3978	-1.28908	-1.18037	-1.07165	-0.962934	-2.9999
r989	C140CAR[c] + CAR[m] <=> C140CAR[m] + CAR[c]		-1.83266	-1.72395	-1.61523	-1.50652	-1.3978	-1.28908	-1.18037	-1.07165	-0.962934	-2.9999
r990	C140CAR[m] + COA[m] <=> C140COA[m] + CAR[m]	2.3.1.7	-1.83266	-1.72395	-1.61523	-1.50652	-1.3978	-1.28908	-1.18037	-1.07165	-0.962934	-2.9999
r991	C160COA[c] + CAR[c] <=> C160CAR[c] + COA[c]	2.3.1.21	7.95808e-13	-2.77516e-11	0	-3.42197e-11	-2.59215e-12	1.58518e-12	2.0417e-11	2.65584e-11	2.93109e-11	-1.62633e-10
r992	C160CAR[c] + CAR[m] <=> C160CAR[m] + CAR[c]		7.95808e-13	-2.77516e-11	0	-3.42197e-11	-2.59215e-12	1.58518e-12	2.0417e-11	2.65584e-11	2.93109e-11	-1.62633e-10
r993	C160CAR[m] + COA[m] <=> C160COA[m] + CAR[m]	2.3.1.21	7.95808e-13	-2.77516e-11	0	-3.42197e-11	-2.59215e-12	1.58518e-12	2.0417e-11	2.65584e-11	2.93109e-11	-1.62633e-10
r994	C180COA[c] + CAR[c] <=> C180CAR[c] + COA[c]	2.3.1.7	0	0	0	0	0	0	0	0	0	0
r995	C180CAR[c] + CAR[m] <=> C180CAR[m] + CAR[c]		0	0	0	0	0	0	0	0	0	0
r996	C180CAR[m] + COA[m] <=> C180COA[m] + CAR[m]	2.3.1.7	0	0	0	0	0	0	0	0	0	0
r997	C160ACP[c] + COA[c] <=> C160COA[c] + ACP[c]	2.3.1.38	1000	1000	1000	1000	1000	1000	1000	1000	1000	0
r998	C180ACP[c] + COA[c] <=> C180COA[c] + ACP[c]	2.3.1.38	0.175566	0.177052	0.178538	0.180023	0.181509	0.182995	0.184481	0.185967	0.187453	-0.041
r999	O2[b] + C160COA[b] -> H2O2[b] + C16DCOA[b]	1.3.3.6	0	0	0	0	0	0	0	0	0	0
r1000	O2[c] + C160COA[c] -> H2O2[c] + C16DCOA[c]	1.3.3.6	0	0	0	0	0	0	0	0	0	0
r1001	O2[p] + C160COA[p] -> H2O2[p] + C16DCOA[p]	1.3.3.6	0	0	0	0	0	0	0	0	0	0
r1002	O2[m] + C160COA[m] -> H2O2[m] + C16DCOA[m]	1.3.3.6	-7.03591e-11	0	-6.09035e-11	0	-5.96958e-11	2.92852e-11	6.7949e-11	0	-3.32692e-10	3.50599e-10
r1003	FAD[m] + C160COA[c] -> FADH2[m] + C16DCOA[c]	1.3.8.7	0	0	0	0	0	0	0	0	0	0
r1004	C16HCOA[c] <=> C16DCOA[c]	4.2.1.74	0	0	0	0	0	0	0	0	0	0
r1005	C16HCOA[m] <=> C16DCOA[m]	4.2.1.17	0	0	0	0	0	0	0	0	0	0
r1006	NADH[m] + C16OCOA[m] <=> NAD[m] + C16HCOA[m]	1.1.1.35	0	0	0	0	0	0	0	0	0	0
r1007	COA[p] + C16OCOA[p] <=> ACCOA[p] + C140COA[p]	2.3.1.16	0	0	0	0	0	0	0	0	0	0
r1008	COA[m] + C16OCOA[m] <=> ACCOA[m] + C140COA[m]	2.3.1.16	0	0	0	0	0	0	0	0	0	0
r1009	O2[m] + C140COA[m] -> H2O2[m] + C14DCOA[m]	1.3.3.6	0	0	0	0	0	0	0	0	0	0
r1010	O2[p] + C140COA[p] -> H2O2[p] + C14DCOA[p]	1.3.3.6	0	0	0	0	0	0	0	0	0	0
r1011	O2[c] + C140COA[c] -> H2O2[c] + C14DCOA[c]	1.3.3.6	-1.69753e-13	0	0	0	0	0	0	0	0	-3.12276e-13
r1012	O2[b] + C140COA[b] -> H2O2[b] + C14DCOA[b]	1.3.3.6	0	0	0	0	0	0	0	0	0	0
r1013	FAD[m] + C140COA[c] -> FADH2[m] + C14DCOA[c]	1.3.8.7	-1.70308e-13	0	0	0	0	0	0	0	0	-3.13297e-13
r1014	C14HCOA[c] <=> C14DCOA[c]	4.2.1.74	1000	1000	1000	1000	1000	1000	1000	1000	1000	0
r1015	C14HCOA[c] <=> C14DCOA[c]	4.2.1.17	1000	1000	1000	1000	1000	1000	1000	1000	1000	0
r1016	C14HCOA[m] <=> C14DCOA[m]	4.2.1.17	0	0	0	0	0	0	0	0	0	0
r1017	NADH[m] + C14OCOA[m] <=> NAD[m] + C14HCOA[m]	1.1.1.35	0	0	0	0	0	0	0	0	0	0
r1018	COA[p] + C14OCOA[p] <=> ACCOA[p] + C120COA[p]	2.3.1.16	0	0	0	0	0	0	0	0	0	0
r1019	COA[m] + C14OCOA[m] <=> ACCOA[m] + C120COA[m]	2.3.1.16	0	0	0	0	0	0	0	0	0	0
r1020	O2[m] + C120COA[m] -> H2O2[m] + C12DCOA[m]	1.3.3.6	0	0	0	0	0	0	0	0	0	0
r1021	O2[p] + C120COA[p] -> H2O2[p] + C12DCOA[p]	1.3.3.6	0	0	0	0	0	0	0	0	0	0
r1022	O2[c] + C120COA[c] -> H2O2[c] + C12DCOA[c]	1.3.3.6	-1.69531e-13	0	0	0	-1.4333e-13	0	0	0	0	-3.11867e-13
r1023	O2[b] + C120COA[b] -> H2O2[b] + C12DCOA[b]	1.3.3.6	0	0	0	0	0	0	0	0	0	0
r1024	FAD[m] + C120COA[c] -> FADH2[m] + C12DCOA[c]	1.3.8.7	-1.7053e-13	0	-1.66978e-13	0	-1.43441e-13	0	0	0	0	-4.67291e-13
r1025	C12HCOA[c] <=> C12DCOA[c]	4.2.1.74	1000	1000	1000	1000	1000	1000	1000	1000	1000	0
r1026	C12HCOA[c] <=> C12DCOA[c]	4.2.1.17	1000	1000	1000	1000	1000	1000	1000	1000	1000	0
r1027	C12HCOA[m] <=> C12DCOA[m]	4.2.1.17	0	0	0	0	0	0	0	0	0	0
r1028	NADH[m] + C12OCOA[m] <=> NAD[m] + C12HCOA[m]	1.1.1.35	0	0	0	0	0	0	0	0	0	0
r1029	COA[p] + C12OCOA[p] <=> ACCOA[p] + C100COA[p]	2.3.1.16	0	0	0	0	0	0	0	0	0	0
r1030	COA[m] + C12OCOA[m] <=> ACCOA[m] + C100COA[m]	2.3.1.16	0	0	0	0	0	0	0	0	0	0
r1031	C12DCOA[m] <=> C12CCOA[m]	5.3.3.8	0	0	0	0	0	0	0	0	0	0
r1032	O2[m] + C100COA[m] -> H2O2[m] + C10DCOA[m]	1.3.3.6	0	0	0	0	0	0	0	0	0	0
r1033	O2[p] + C100COA[p] -> H2O2[p] + C10DCOA[p]	1.3.3.6	0	0	0	0	0	0	0	0	0	0
r1034	O2[c] + C100COA[c] -> H2O2[c] + C10DCOA[c]	1.3.3.6	-1.70419e-13	0	-1.53544e-13	1.05804e-13	-1.44218e-13	0	0	0	0	-4.06071e-13
r1035	O2[b] + C100COA[b] -> H2O2[b] + C10DCOA[b]	1.3.3.6	0	0	0	0	0	0	0	0	0	0
r1036	FAD[m] + C100COA[c] -> FADH2[m] + C10DCOA[c]	1.3.8.7	-1.7053e-13	0	-1.52767e-13	0	-1.44218e-13	0	0	0	0	-4.5422e-13
r1037	C10HCOA[c] <=> C10DCOA[c]	4.2.1.74	1000	1000	1000	1000	1000	1000	1000	1000	1000	0
r1038	C10HCOA[m] <=> C10DCOA[m]	4.2.1.17	1000	1000	1000	1000	1000	1000	1000	1000	1000	0
r1039	NADH[m] + C10OCOA[m] <=> NAD[m] + C10HCOA[m]	1.1.1.35	0	0	0	0	0	0	0	0	0	0
r1040	COA[p] + C10OCOA[p] <=> ACCOA[p] + C80COA[p]	2.3.1.16	0	0	0	0	0	0	0	0	0	0
r1041	COA[m] + C10OCOA[m] <=> ACCOA[m] + C80COA[m]	2.3.1.16	0	0	0	1.13687e-13	0	1.4988e-13	0	0	0	-1.66452e-14
r1042	O2[m] + C80COA[m] -> H2O2[m] + C8DCOA[m]	1.3.3.6	0	0	0	0	0	0	0	0	0	0
r1043	O2[p] + C80COA[p] -> H2O2[p] + C8DCOA[p]	1.3.3.6	0	0	0	0	0	0	0	0	0	0
r1044	O2[c] + C80COA[c] -> H2O2[c] + C8DCOA[c]	1.3.3.6	-1.69975e-13	0	-1.77081e-13	0	-1.86851e-13	0	-2.03726e-13	0	0	-2.88176e-13
r1045	O2[b] + C80COA[b] -> H2O2[b] + C8DCOA[b]	1.3.3.6	0	0	0	0	0	0	0	0	0	0
r1046	FAD[m] + C80COA[c] -> FADH2[m] + C8DCOA[c]	1.3.8.7	-1.7053e-13	0	-1.49214e-13	0	-1.89182e-13	0	-2.00062e-13	0	0	-2.66936e-13
r1047	C8HCOA[c] <=> C8DCOA[c]	4.2.1.74	1000	1000	1000	1000	1000	1000	1000	1000	1000	0
r1048	C8HCOA[m] <=> C8DCOA[m]	4.2.1.17	1000	1000	1000	1000	1000	1000	1000	1000	1000	0
r1049	NADH[m] + C8OCOA[m] <=> NAD[m] + C8HCOA[m]	1.1.1.35	0	0	0	0	0	0	0	0	0	0
r1050	COA[p] + C8OCOA[p] <=> ACCOA[p] + C60COA[p]	2.3.1.16	0	0	0	0	0	0	0	0	0	0
r1051	COA[m] + C8OCOA[m] <=> ACCOA[m] + C60COA[m]	2.3.1.16	1000	1000	1000	1000	1000	1000	1000	1000	1000	0
r1052	O2[m] + C60COA[m] -> H2O2[m] + C6HCOA[m]	1.3.3.6	0	0	0	0	0	0	0	0	0	0
r1053	O2[p] + C60COA[p] -> H2O2[p] + C6HCOA[p]	1.3.3.6	0	0	0	0	0	0	0	0	0	0
r1054	O2[c] + C60COA[c] -> H2O2[c] + C6DCOA[c]	1.3.3.6	-1.70419e-13	3.56493e-13	1.14242e-13	0	0	0	0	0	-3.83138e-13	9.88244e-13
r1055	O2[b] + C60COA[b] -> H2O2[b] + C6DCOA[b]	1.3.3.6	0	0	0	0	0	0	0	0	0	0
r1056	FAD[m] + C60COA[c] -> FADH2[m] + C6DCOA[c]	1.3.8.7	-1.7053e-13	0	1.13687e-13	0	0	0	0	0	0	-2.09137e-13
r1057	C6HCOA[c] <=> C6DCOA[c]	4.2.1.74	1000	1000	1000	1000	1000	1000	1000	1000	1000	0
r1058	C6HCOA[m] <=> C6DCOA[m]	4.2.1.17	1000	1000	1000	1000	1000	1000	1000	1000	1000	0
r1059	NADH[m] + C6OCOA[m] <=> NAD[m] + C6HCOA[m]	1.1.1.35	0	0	0	0	0	0	0	0	0	0
r1060	COA[p] + C6OCOA[p] <=> ACCOA[p] + C40COA[p]	2.3.1.16	0	0	0	0	0	0	0	0	0	0
r1061	COA[m] + C6OCOA[m] <=> ACCOA[m] + C40COA[m]	2.3.1.16	1000	1000	1000	1000	1000	1000	1000	1000	1000	0
r1062	O2[m] + C40COA[m] -> H2O2[m] + C4HCOA[m]	1.3.3.6	0	0	0	0	0	0	0	0	0	0
r1063	O2[p] + C40COA[p] -> H2O2[p] + C4HCOA[p]	1.3.3.6	0	0	0	0	0	0	0	0	0	0
r1064	O2[c] + C40COA[c] -> H2O2[c] + C4DCOA[c]	1.3.3.6	0	0	0	0	0	0	0	0	0	0
r1065	O2[b] + C40COA[b] -> H2O2[b] + C4HCOA[b]	1.3.3.6	0	0	0	0	0	0	0	0	0	0
r1066	FAD[m] + C40COA[c] -> FADH2[m] + C4DCOA[c]	1.3.8.7	0	0	0	0	0	0	0	0	0	0
r1067	GLTCOA[m] + FAD[m] -> C4DCOA[m] + CO2[m] + FADH2[m]	1.3.8.6	0	0	0	0	0	0	0	0	0	0
r1068	C4HCOA[m] <=> C4DCOA[m]	4.2.1.17	0	0	0	0	0	0	0	0	0	0
r1069	C4HCOA[c] <=> C4DCOA[c]	4.2.1.17	0	0	0	0	0	0	0	0	0	0
r1070	NADH[m] + AACCOA[m] <=> NAD[m] + C4HCOA[m]	1.1.1.35	1000	1000	1000	1000	1000	1000	1000	1000	1000	0
r1071	COA[p] + AACCOA[p] <=> 2 ACCOA[p]	2.3.1.9	0	0	0	0	0	0	0	0	0	0
r1072	COA[m] + AACCOA[m] <=> 2 ACCOA[m]	2.3.1.9	992.823	993.242	993.662	994.082	994.501	994.921	995.341	995.76	996.18	-11.5794
r1073	COA[c] + AACCOA[c] <=> 2 ACCOA[c]	2.3.1.9	507.01	506.491	505.971	505.451	504.932	504.412	503.892	503.373	502.853	14.3388
r1074	2 ACCOA[m] <=> COA[m] + AACCOA[m]	2.3.1.9	1000	1000	1000	1000	1000	1000	1000	1000	1000	0
r1075	LEUKA[c] + H2O[c] -> LEUKB[c]	3.3.2.6	0	0	0	0	0	0	0	0	0	0
r1076	NAD[m] + METTHF[m] -> NADH[m] + METHF[m]	1.5.1.15	0	0	0	0	0	0	0	0	0	0
r1077	NAD[c] + METTHF[c] -> NADH[c] + METHF[c]	1.5.1.15	0	0	0	0	0	0	0	0	0	0
r1078	ATP[c] + FOR[c] + THF[c] -> ADP[c] + PI[c] + FTHF[c]	6.3.4.3	0.485787	0.885787	1.28579	1.68579	2.08579	2.48579	2.88579	3.28579	3.68579	-11.0375
r1079	ATP[c] + GLU[c] + THF[c] <=> ADP[c] + PI[c] + THFG[c]	6.3.2.17	0	0	0	0	0	0	0	0	0	0
r1080	ATP[m] + GLU[m] + THF[m] <=> PI[m] + ADP[m] + THFG[m]	6.3.2.17	0	0	0	0	0	0	0	0	0	0
r1081	GTP[c] -> FOR[c] + AHTD[c]	3.5.4.16	0	0	0	0	0	0	0	0	0	0
r1082	AHTD[c] -> 3 PI[c] + PYVYLTRIN[c]	4.2.3.12	0	0	0	0	0	0	0	0	0	0
r1083	AHTD[m] -> 3 PI[m] + PYVYLTRIN[m]	4.2.3.12	0	0	0	0	0	0	0	0	0	0
r1084	2 NADPH[c] + PYVYLTRIN[c] -> 2 NADP[c] + THBOPRIN[c]	1.1.1.153	0	0	0	0	0	0	0	0	0	0
r1085	NADP[c] + THBOPRIN[c] -> NADPH[c] + DHBOPRIN[c]	1.5.1.34	0	0	0	0	0	0	0	0	0	0
r1086	GLN[c] + CHOR[c] -> GLU[c] + ADCHOR[c]	2.6.1.85	0	0	0	0	0	0	0	0	0	0
r1087	PABA[c] + AHHMD[c] -> PPI[c] + DHPT[c]	2.5.1.15	0	0	0	0	0	0	0	0	0	0
r1088	PABA[c] + AHHMP[c] -> DHPT[c]	2.5.1.15	0	0	0	0	0	0	0	0	0	0
r1089	ATP[c] + GLU[c] + DHPT[c] -> ADP[c] + PI[c] + DHF[c]	6.3.2.12; 6.3.2.17	0	0	0	0	0	0	0	1.13687e-13	0	-1.56853e-13
r1090	ATP[m] + GLU[m] + DHPT[m] -> PI[m] + ADP[m] + DHF[m]	6.3.2.12; 6.3.2.17	1.13687e-13	0	0	0	0	0	0	1.13687e-13	0	5.22843e-14
r1091	NADPH[m] + DHF[m] -> NADP[m] + THF[m]	1.5.1.3	0.00395144	0.00395144	0.00395144	0.00395144	0.00395144	0.00395144	0.00395144	0.00395144	0.00395144	5.22859e-14
r1092	NADPH[c] + DHF[c] -> NADP[c] + THF[c]	1.5.1.3	0.00395144	0.00395144	0.00395144	0.00395144	0.00395144	0.00395144	0.00395144	0.00395144	0.00395144	5.22859e-14
r1093	H2O[m] + LMETTRNA[m] + FTHF[m] -> THF[m] + FOFMET[m]	2.1.2.9	1.11431e-10	-4.20072e-11	1.07073e-10	9.87453e-10	0	0	0	0	0	6.99641e-10
r1094	H2O[c] + LMETTRNA[c] + FTHF[c] -> THF[c] + FOFMET[c]	2.1.2.9	4.27951e-11	-1.67377e-11	4.06499e-11	1.54592e-10	0	7.85844e-11	-4.3895e-11	4.62154e-12	-2.38387e-11	2.05829e-10
r1095	NADPH[c] + METTHF[c] -> NADP[c] + MTHF[c]	1.5.1.20	0.0180234	0.0180234	0.0180234	0.0180234	0.0180234	0.0180234	0.0180234	0.0180234	0.0180234	-8.07576e-14
r1096	ATP[c] + FTHF[c] -> ADP[c] + PI[c] + MTHF[c]	6.3.3.2	-7.81142e-10	-1.40204e-10	2.33389e-10	-1.41085e-10	-3.89491e-10	3.06019e-10	-9.11619e-11	-5.95565e-11	-2.84615e-10	-9.31777e-10
r1097	AHHMP[c] + ATP[c] -> AMP[c] + AHHMD[c]	2.7.6.3	0	0	0	0	0	0	0	0	0	0
r1098	DHP[c] -> AHHMP[c] + GLAL[c]	4.1.2.25	0	0	0	0	0	0	0	0	0	0
r1099	ATP[b] + MODO[b] -> PPI[b] + ADMODO[b]	2.7.7.75	0	0	0	0	0	0	0	0	0	0
r1100	ATP[c] + MODO[c] -> PPI[c] + ADMODO[c]	2.7.7.75	0	0	0	0	0	0	0	0	0	0
r1101	ADMODO[b] + MODA[b] -> MODECO[b] + AMP[b]+ H2O [b]	2.10.1.1	0	0	0	0	0	0	0	0	0	0
r1102	ADMODO[c] + MODA[c] -> MODECO[c] + AMP[c] + H2O[c]	2.10.1.1	0	0	0	0	0	0	0	0	0	0
r1103	ATP[c] + NADPH[c] + FOR[c] + THF[c] -> ADP[c] + PI[c] + NADP[c] + METTHF[c]	1.5.1.5; 3.5.4.9; 6.3.4.3	-8.51626e-10	-1.53127e-10	2.54369e-10	-1.55422e-10	-2.30901e-10	3.35199e-10	-1.01104e-10	-1.69121e-10	-3.12619e-10	-8.68156e-10
r1104	METTHF[m] + OIVAL[m] -> THF[m] + AKP[m]	2.1.2.11	0	0	0	0	0	0	0	0	0	0
r1105	NADPH[c] + AKP[c] -> NADP[c] + PANT[c]	1.1.1.169	0	0	0	0	0	0	0	0	0	0
r1106	NADPH[m] + AKP[m] -> NADP[m] + PANT[m]	1.1.1.169	0	0	0	0	0	0	0	0	0	0
r1107	ATP[m] + PANT[m] + bALA[m] -> PPI[m] + AMP[m] + PNTO[m]	6.3.2.1	0	0	0	0	0	0	0	0	0	0
r1108	ATP[c] + PNTO[c] -> ADP[c] + 4PPNTO[c]	2.7.1.33	0	0	0	0	0	0	0	0	0	0
r1109	CYS[c] + CTP[c] + 4PPNTO[c] -> PPI[c] + CMP[c] + 4PPNCYS[c]	6.3.2.5	1.55637e-10	0	1.83368e-10	4.86472e-10	8.30141e-10	-2.72059e-10	-6.67121e-11	-1.16441e-11	-1.97892e-10	1.24528e-09
r1110	4PPNCYS[c] -> CO2[c] + 4PPNTE[c]	4.1.1.36	1.55637e-10	0	0	4.86472e-10	8.30141e-10	-2.72059e-10	-6.67121e-11	-1.16441e-11	-1.97892e-10	1.07662e-09
r1111	ATP[m] + 4PPNTE[m] -> PPI[m] + DPCOA[m]	2.7.7.3	0	0	0	0	0	0	0	0	0	0
r1112	ATP[c] + DPCOA[c] -> ADP[c] + COA[c]	2.7.1.24	0	0	0	0	0	0	0	0	0	0
r1113	COA[c] + APOACP[c] -> PAP[c] + HOACP[c]	2.7.8.7	0	-2.7045e-13	0	0	0	0	0	0	0	-3.73138e-13
r1114	COA[e] + + APOACP[e] -> PAP[e] + HOACP[e]	2.7.8.7	0	0	0	0	0	0	0	0	0	0
r1115	AIR[c] -> AHM[c]		0	0	0	0	0	0	0	0	0	0
r1116	ATP[c] + AHM[c] -> ADP[c] + AHMP[c]	2.7.1.49	0	0	0	0	0	0	0	0	0	0
r1117	ATP[c] + AHMP[c] -> ADP[c] + AHMPP[c]	2.7.4.7	0	0	0	0	0	0	0	0	0	0
r1118	ATP[c] + THZ[c] -> ADP[c] + THZP[c]	2.7.1.50	0	0	0	0	0	0	0	0	0	0
r1119	AHMPP[c] + THZP[c] -> PPI[c] + THMP[c]	2.5.1.3	0	0	0	0	0	0	0	0	0	0
r1120	ATP[c] + THME[c] -> ADP[c] + THMP[c]	2.7.1.89	0	0	0	0	0	0	0	0	0	0
r1121	ATP[c] + THMP[c] <=> ADP[c] + THDP[c]	2.7.4.16	0	0	0	0	0	0	0	0	0	0
r1122	ATP[c] + THME[c] -> AMP[c] + THDP[c]	2.7.6.2	0	0	0	0	0	0	0	0	0	0
r1123	ATP[c] + NIDRINE[c] <=> PPI[c] + NAD[c]	2.7.7.1	0	0	0	0	0	0	0	0	0	0
r1124	ATP[c] + NICNUCLE[c] <=> PPI[c] + DMNAD[c]	2.7.7.18	2.86284e-10	-9.20067e-10	2.63632e-10	1.08228e-09	-1.25145e-10	-9.53868e-11	-6.71596e-11	-1.08233e-10	-1.68537e-09	3.35283e-09
r1125	ATP[c] + H2O[c] + GLN[c] + DMNAD[c] -> NAD[c] + AMP[c] + PPI[c] + GLU[c]	6.3.5.1	2.86284e-10	-9.20067e-10	2.63632e-10	1.08228e-09	-1.25145e-10	-9.53868e-11	-6.71596e-11	-1.08233e-10	-1.68537e-09	3.35283e-09
r1126	H2O[c] + NICD[c] -> NH3[c] + NICNATE[c]	3.5.1.19	2.86511e-10	-9.20127e-10	2.63632e-10	1.08038e-09	-1.24912e-10	-9.5397e-11	-6.7387e-11	-1.08065e-10	-1.68543e-09	3.35238e-09
r1127	H2O[c] + PRPP[c] + NICNATE[c] -> PPI[c] + NICNUCLE[c]	2.4.2.11	2.86511e-10	-9.20127e-10	2.63632e-10	1.08038e-09	-1.24912e-10	-9.5397e-11	-6.7387e-11	-1.08065e-10	-1.68543e-09	3.35238e-09
r1128	NAD[c] + H2O[c] -> AMP[c] + NMN[c]	3.6.1.22	2.86511e-10	-9.20127e-10	2.63632e-10	1.08038e-09	-1.24912e-10	-9.5397e-11	-6.7387e-11	-1.08065e-10	-1.68543e-09	3.35238e-09
r1129	H2O[c] + NMN[c] -> R5P[c] + NICD[c]	3.2.2.14	2.86511e-10	-9.20127e-10	2.63632e-10	1.08038e-09	-1.24912e-10	-9.5397e-11	-6.7387e-11	-1.08065e-10	-1.68543e-09	3.35238e-09
r1130	CMUSA[c] -> H2O[c] + QA[c]		-2.27374e-13	0	0	1.90432e-12	-2.33147e-13	0	2.27374e-13	-1.67463e-13	0	4.79428e-13
r1131	PRPP[c] + QA[c] -> CO2[c] + PPI[c] + NICNUCLE[c]	2.4.2.19	-2.27374e-13	0	0	1.90432e-12	-2.33147e-13	0	2.27374e-13	-1.67463e-13	0	4.79428e-13
r1132	ATP[c] + NAD[c] -> ADP[c] + NADP[c]	2.7.1.23	-3.41061e-13	0	0	1.59162e-12	0	0	0	-4.0945e-13	0	6.69484e-13
r1133	NAD[m] + ATP[m] -> ADP[m] + NADP[m]	2.7.1.23	-1.13687e-13	0	0	0	0	0	0	0	0	-2.09137e-13
r1134	ATP[e] + NAD[e] -> ADP[e] + NADP[e]	2.7.1.23	0	0	0	0	0	0	0	0	0	0
r1135	SAM[c] + NICD[c] -> SAH[c] + METNIC[c]	2.1.1.1	0	0	0	0	0	0	0	0	0	0
r1136	ATP[c] + bDRIBN[c] -> ADP[c] + NICNUCLE[c]	2.7.1.173	0	0	0	0	-3.20632e-13	0	0	0	0	-7.43162e-23
r1137	ATP[c] + PDXAM[c] -> ADP[c] + PDXAM5PI[c]	2.7.1.35	-5.11425e-10	-9.77879e-11	1.29717e-10	4.2675e-10	0	-4.87909e-11	-4.96969e-11	-1.13535e-09	-8.03165e-10	2.35192e-09
r1138	ATP[c] + PDXAL[c] -> ADP[c] + PDXL5PI[c]	2.7.1.35	0	0	0	0	0	0	0	0	0	0
r1139	ATP[c] + PDXI[c] -> ADP[c] + PDXIPI[c]	2.7.1.35	0	0	0	0	0	0	0	0	0	0
r1140	H2O[c] + O2[c] + PDXIPI[c] -> H2O2[c] + NH3[c] + PDXL5PI[c]	1.4.3.5	0	0	0	0	0	0	0	0	0	0
r1141	H2O[c] + O2[c] + PDXAM5PI[c] -> H2O2[c] + NH3[c] + PDXL5PI[c]	1.4.3.5	0	0	0	0	0	0	0	0	0	0
r1142	H2O[c] + O2[c] + PDXAL[c] <=> H2O2[c] + NH3[c] + PDXI[c]	1.4.3.5	0	0	0	0	0	0	0	0	0	0
r1143	H2O[c] + O2[c] + PDXAL[c] <=> H2O2[c] + NH3[c] + PDXAM[c]	1.4.3.5	0	0	0	0	0	0	0	0	0	0
r1144	2 AMIEVUL[c] -> H2O[c] + PPBG[c]	4.2.1.24	0	0	0	0	0	0	0	0	0	0
r1145	2 AMIEVUL[m] -> H2O[m] + PPBG[m]	4.2.1.24	0	0	0	0	0	0	0	0	0	0
r1146	H2O[c] + 4 PPBG[c] -> 4 NH3[c] + HMTB[c]	2.5.1.61	0	0	0	0	0	0	0	0	0	0
r1147	H2O[m] + 4 PPBG[m] -> 4 NH3[m] + HMTB[m]	2.5.1.61	0	0	0	0	0	0	0	0	0	0
r1148	HMTB[c] -> H2O[c] + UPGIII[c]	4.2.1.75	0	0	0	0	0	0	0	0	0	0
r1149	UPGIII[c] -> 4 CO2[c] + CPGIII[c]	4.1.1.37	0	0	0	0	0	0	0	0	0	0
r1150	UPGIII[m] -> 4 CO2[m] + CPGIII[m]	4.1.1.37	0	0	0	0	0	0	0	0	0	0
r1151	O2[c] + CPGIII[c] -> 2 H2O[c] + 2 CO2[c] + PPGIX[c]	1.3.3.3	0	0	0	0	0	0	0	0	0	0
r1152	3 O2[m] + PPGIX[m] -> 3 H2O[m] + PPRIX[m]	1.3.3.4	0	0	0	0	0	0	0	0	0	0
r1153	PPRIX[m] + FE[m] -> PHEME[m]	4.99.1.1	0	0	0	0	0	0	0	0	0	0
r1154	PPRIX[c] + FE[c] -> PHEME[c]	4.99.1.1	0	0	0	0	0	0	0	0	0	0
r1155	PHEME[b] -> HEME_O[b]	2.5.1.-	0	0	0	0	0	0	0	0	0	0
r1156	HEME_O[b] -> HEME_A[b]		0	0	0	0	0	0	0	0	0	0
r1157	PHEME[m] + APOCE[m] -> CYMEC[m]	4.4.1.17	0	0	0	0	0	0	0	0	0	0
r1158	PHEME[c] + APOCE[c] -> CYMEC[c]	4.4.1.17	0	0	0	0	0	0	0	0	0	0
r1159	SAM[c] + UPGIII[c] -> SAH[c] + PRECOR[c]	2.1.1.107	0	0	0	0	0	0	0	0	0	0
r1160	NAD[e] + PRECOR[e] -> NADH[e] + SHCR[e]	1.3.1.76	0	0	0	0	0	0	0	0	0	0
r1161	SHCR[e] -> SIHM[e]	4.99.1.4	0	0	0	0	0	0	0	0	0	0
r1162	CHOR[c] -> PYR[c] + 4HBZ[c]	4.1.3.-	0	0	0	0	0	0	0	0	0	0
r1163	ATP[c] + COBNM[c] -> 3 PI[c] + ADCOBNM[c]	2.5.1.17	0	0	0	0	0	0	0	0	0	0
r1164	4HBZ[b] + NPP[b] -> PPI[b] + N4HBZ[b]	2.5.1.-	0	0	0	0	0	0	0	0	0	0
r1165	N4HBZ[c] -> CO2[c] + 2NPPP[c]	4.1.1.-	0	0	0	0	0	0	0	0	0	0
r1166	O2[c] + 2NPPP[c] -> 2N6H[c]	1.13.14.-	0	0	0	0	0	0	0	0	0	0
r1167	SAM[m] + 2N6H[m] -> SAH[m] + 2NPMP[m]	2.1.1.64	0	0	0	0	0	0	0	0	0	0
r1168	O2[m] + 2NPMP[m] -> 2NPMB[m]	1.14.13.-	0	0	0	0	0	0	0	0	0	0
r1169	SAM[c] + 2NPMB[c] -> SAH[c] + 2NPMMB[c]	2.1.1.-	0	0	0	0	0	0	0	0	0	0
r1170	O2[m] + 2NPMMB[m] -> 2NMHMB[m]	1.14.13.-	0	0	0	0	0	0	0	0	0	0
r1171	O2[c] + 2NPMMB[c] -> 2NMHMB[c]	1.14.13.-	0	0	0	0	0	0	0	0	0	0
r1172	SAM[m] + 2NMHMB[m] -> Q[m] + SAH[m]	2.1.1.64	0	0	0	0	0	0	0	0	0	0
r1173	NADPH[c] + O2[c] + 4HBZ[c] -> H2O[c] + NADP[c] + PCACE[c]	1.14.13.2	0	0	0	0	0	0	0	0	0	0
r1174	SAM[c] + 2N6H[c] -> SAH[c] + 2NPMP[c]	2.1.1.222	0	0	0	0	0	0	0	0	0	0
r1175	PLPNDPI[b] + HBZA[b] -> PPI[b] + HPLPNBZA[b]	2.5.1.39	0	0	0	0	0	0	0	0	0	0
r1176	4CMRE[c] + ATP[c] + COA[c] -> 4CMCOA[c] + AMP[c] + PPI[c]	6.2.1.12	0	0	0	0	-1.13687e-13	0	0	-4.45866e-13	0	6.15157e-13
r1177	GTP[c] -> PPI[c] + FOR[c] + D6RP5P[c]	3.5.4.25	0	0	0	0	0	0	0	0	0	0
r1178	D6RP5P[c] -> NH3[c] + A6RP5P[c]	3.5.4.26	0	0	0	0	0	0	0	0	0	0
r1179	NADPH[c] + A6RP5P[c] -> NADP[c] + A6RP5P2[c]	1.1.1.193	0	0	0	0	0	0	0	0	0	0
r1180	H2O[c] + A6RP5P2[c] -> PI[c] + A6RP[c]	3.1.3.-	0	0	0	0	0	0	0	0	0	0
r1181	RL5P[c] -> FOR[c] + DB4P[c]	4.1.99.12	0	0	0	0	0	0	0	0	0	0
r1182	A6RP[c] + DB4P[c] -> PI[c] + 2 H2O[c] + D8RL[c]	2.5.1.78	0	0	0	0	0	0	0	0	0	0
r1183	D8RL[c] -> A6RP[c] + RIBFLAV[c]	2.5.1.9	0	0	0	0	0	0	0	0	0	0
r1184	ATP[c] + RIBFLAV[c] -> ADP[c] + FMN[c]	2.7.1.26	-5.95956e-10	-2.17258e-09	-9.25062e-10	-1.0976e-08	-3.50943e-09	2.27702e-09	-4.48841e-10	-3.71491e-09	-1.17999e-08	1.62055e-08
r1185	ATP[c] + FMN[c] -> PPI[c] + FAD[c]	2.7.7.2	0	0	0	0	0	0	0	0	0	0
r1186	FMN[c] -> PI[c] + RIBFLAV[c]	3.1.3.2	-5.95956e-10	-2.17258e-09	-9.25062e-10	-1.0976e-08	-3.50943e-09	2.27702e-09	-4.48841e-10	-3.71491e-09	-1.17999e-08	1.62055e-08
r1187	FMNH2[c] + NADP[c] -> FMN[c] + NADPH[c]	1.5.1.39	-1.8456e-10	0	-1.07473e-09	0	-1.36597e-10	-2.0388e-10	0	0	0	-1.23429e-09
r1188	ATP[c] + COA[c] + 6CARHEX[c] -> AMP[c] + PPI[c] + CHCOA[c]	6.2.1.14	0	0	0	0	6.91216e-11	0	0	0	0	1.6021e-20
r1189	ALA[c] + CHCOA[c] -> CO2[c] + COA[c] + AONA[c]	2.3.1.47	0	0	0	0	6.91216e-11	0	0	0	0	1.6021e-20
r1190	ALA[m] + CHCOA[m] -> COA[m] + CO2[m] + AONA[m]	2.3.1.47	0	0	0	0	0	0	0	0	0	0
r1191	SAM[c] + AONA[c] -> SAMOB[c] + DANNA[c]	2.6.1.62	0	0	0	0	6.91216e-11	0	-2.59143e-10	0	0	2.38359e-10
r1192	ATP[c] + CO2[c] + DANNA[c] -> ADP[c] + PI[c] + DTB[c]	6.3.3.3	0	0	0	0	0	0	-2.59143e-10	0	0	2.38359e-10
r1193	2 SAM[c] + DTB[c] + S[c] -> 2 MET[c] + 2 DA[c] + BT[c]	2.8.1.6	0	0	0	0	0	0	0	0	0	0
r1194	2 SAM[m] + DTB[m] + S[m] -> 2 MET[m] + BT[m] + 2 DA[m]	2.8.1.6	0	0	0	0	-8.90353e-11	0	-1.34924e-10	0	0	1.24102e-10
r1195	ATP[c] + BT[c] -> PPI[c] + BTAMP[c]	6.3.4.15	0	0	0	0	0	0	0	0	0	0
r1196	BTAMP[c] + APOCARB[c] -> AMP[c] + BCCP[c]	6.3.4.15	0	0	0	0	0	0	0	0	0	0
r1197	SAM[c] + MALACP[c] -> SAH[c] + MALACP_MES[c]	2.1.1.197	0	0	0	0	0	0	0	0	0	0
r1198	CYSTE[c] -> CO2[c] + TAUR[c]	4.1.1.15	0	0	0	0	0	0	0	0	0	0
r1199	CYSTE[m] -> CO2[m] + TAUR[m]	4.1.1.15	0	0	0	0	0	0	0	0	0	0
r1200	AKG[c] + O2[c] + TAUR[c] -> CO2[c] + SUCC[c] + H2S[c] + AMIACE[c]	1.14.11.17	0	0	0	0	0	0	0	0	0	0
r1201	ATP[c] + GLU[c] + CYS[c] -> ADP[c] + PI[c] + GC[c]	6.3.2.2	0	0	0	0	0	0	0	0	0	0
r1202	ATP[c] + GLY[c] + GC[c] -> ADP[c] + PI[c] + RGT[c]	6.3.2.3	0	0	0	0	0	0	0	0	0	0
r1203	RGT[c] + RX[c] -> RSGT[c] + HX[c]	2.5.1.18	0	0	0	0	0	0	0	0	0	0
r1204	RGT[b] + RX[b] -> RSGT[b] + HX[b]	2.5.1.18	0	0	0	0	0	0	0	0	0	0
r1205	RSGT[b] + ALA[b] -> CGLY[b] + ALAGLY[b]	2.3.2.2	0	0	0	0	0	0	0	0	0	0
r1206	RSGT[c] + ALA[c] -> CGLY[c] + ALAGLY[c]	2.3.2.2	0	0	0	0	0	0	0	0	0	0
r1207	RSGT[p] + ALA[p] -> CGLY[p] + ALAGLY[p]	2.3.2.2	0	0	0	0	0	0	0	0	0	0
r1208	H2O[c] + CGLY[c] -> GLY[c] + CYS[c]	3.4.11.1	0	0	0	0	0	0	0	0	0	0
r1209	ATP[c] + 2 H2O[c] + 5OXOPRO[c] -> ADP[c] + PI[c] + GLU[c]	3.5.2.9	0	0	0	0	0	0	0	0	0	0
r1210	2 RGT[c] + H2O2[c] -> 2 H2O[c] + RSGT[c]	1.11.1.9	1.76344e-10	-8.73086e-10	-7.8791e-10	-5.64711e-10	-2.13149e-10	-5.44748e-10	-2.58488e-10	1.15898e-09	-2.8812e-09	2.32487e-09
r1211	2 RGT[m] + H2O2[m] -> 2 H2O[m] + RSGT[m]	1.11.1.9	0	0	0	0	0	0	0	0	0	0
r1212	NADPH[c] + RSGT[c] -> NADP[c] + 2 RGT[c]	1.8.1.7	1.76344e-10	-8.73086e-10	-7.8791e-10	-5.64711e-10	-2.13149e-10	-5.44748e-10	-2.58488e-10	1.15898e-09	-2.8812e-09	2.32487e-09
r1213	H2O[c] + CGLY[c] -> GLY[c] + CYS[c]	3.4.11.2	0	0	0	0	0	0	0	0	0	0
r1214	2 RTHIO[c] + ROOH[c] -> OTHIO[c] + H2O[c] + ROH[c]	1.11.1.15	0	0	0	0	0	0	0	0	0	0
r1215	2 RGT[c] + ROOH[c] -> RGTDS[c] + H2O[c] + ROH[c]	1.11.1.15	0	0	0	0	0	0	0	0	0	0
r1216	C80ACP[c] + 2 SSC[c] + 2 SAM[c] + 2 RFERN[c] -> LIPACP[c] + 2 SCARR[c] + 2 MET[c] + 2 5DA[c] + 2 OFERN[c]	2.8.1.8	0	0	0	0	0	0	0	0	0	0
r1217	LIPACP[c] + PROTEIN [c] -> PROTEIN_LIPL[c] + ACP[c]	2.3.1.181	0	0	0	0	0	0	0	0	0	0
r1218	C80ACP[c] + PROTEIN [c] -> PROTEIN_C80L[c] + ACP[c]	2.3.1.181	0	0	0	0	0	-7.7839e-11	0	0	0	3.5798e-11
r1219	PROTEIN_C80L[c] + 2 SSC[c] + 2 SAM[c] + 2 RFERN[c] -> PROTEIN_LIPL[c] + 2 SCARR[c] + 2 MET[c] + 2 5DA[c] + 2 OFERN[c]	2.8.1.8	0	0	0	0	0	0	0	0	0	0
r1220	ATP[c] + LIPIC[c] -> PPI[c] + LIPAMP[c]	2.7.7.63	-3.05442e-10	0	0	0	0	0	0	0	0	-5.61888e-10
r1221	LIPAMP[c] + APOPROT[c] -> PROTEIN_LIPL[c] + AMP[c]	2.7.7.63	-3.05442e-10	0	0	0	0	0	0	0	0	-5.61888e-10
r1222	2 GGPP[b] -> PTEPPI[b] + PPI[b]	2.5.1.32	0	0	0	0	0	0	0	0	0	0
r1223	PTEPPI[b] -> PTE[b] + PPI[b]	2.5.1.32	0	0	0	0	0	0	0	0	0	0
r1224	PTE[b] + 4 FAD[b] -> LCP[b] + 4 FADH2[b]	1.3.99.31	0	0	0	0	0	0	0	0	0	0
r1225	LCP[b] -> GCATE[b]	5.5.1.19	0	0	0	0	0	0	0	0	0	0
r1226	GCATE[b] -> BCATE[b]	5.5.1.19	0	0	0	0	0	0	0	0	0	0
r1227	BCATE[b] + O2[b] -> 2 RTN[b]	1.13.11.63	0	0	0	0	0	0	0	0	0	0
r1228	5.168 ATP[c] + 0.0626 GLU[c] + 0.0591 ASP[c] + 0.0719 ALA[c] + 0.0509 GLY[c] + 0.0493 GLN[c] + 0.0494 ASN[c] + 0.0476 ARG[c] + 0.0493 PRO[c] + 0.0128 CYS[c] + 0.0834 SER[c] + 0.0623 THR[c] + 0.0255 HIS[c] + 0.0579 ILE[c] + 0.033 VAL[c] + 0.0881 LEU[c] + 0.033 TYR[c] + 0.0624 LYS[c] + 0.0249 MET[c] + 0.0111 TRP[c] + 0.0389 PHE[c] -> 5.168 ADP[c] + 5.168 PI[c] + Protein[c]		0.461497	0.461497	0.461497	0.461497	0.461497	0.461497	0.461497	0.461497	0.461497	-2.34631e-31
r1229	2.544 ATP[c] + 0.241 GTP[c] + 0.225 UTP[c] + 0.253 CTP[c] -> 2.544 ADP[c] + 2.544 PI[c] + RNA[c]		0.0261344	0.0261344	0.0261344	0.0261344	0.0261344	0.0261344	0.0261344	0.0261344	0.0261344	1.46644e-32
r1230	0.11785 ERGOSE[c] + 0.725 TAGLY[c] + 0.01955 DAGLY[c] + 0.03188 PC[c] + 0.00684 PA[c] + 0.04264 PE[c] + 0.00302 PS[c] + 0.05227 FFA[c] + 0.00093 PINS[c] -> Lipid[c]		0.0554271	0.0554271	0.0554271	0.0554271	0.0554271	0.0554271	0.0554271	0.0554271	0.0554271	2.93288e-32
r1231	3.739 ATP[c] + 0.2989 DATP[c] + 0.2136 DGTP[c] + 0.220 DCTP[c] + 0.2654 DTTP[c] -> 3.739 ADP[c] + 3.739 PI[c] + DNA[c]		0.0148886	0.0148886	0.0148886	0.0148886	0.0148886	0.0148886	0.0148886	0.0148886	0.0148886	0
r1232	153 ATP[c] + 0.44 UDPGE[c] + 0.1676 GDPFUC[c] + 0.0643 MAN[c] + 0.0018 GLYNIN[c] + 0.0026 CHIT[c] + 0.0001 CHITO[c] + 2.7618 Protein[c] + 0.1564 RNA[c] + 0.0891 DNA[c] + 0.3317 Lipid[c] -> 153 ADP[c] + 153 PI[c] + BIOMASS[c]		0.1671	0.1671	0.1671	0.1671	0.1671	0.1671	0.1671	0.1671	0.1671	0
r1233	ATP[c] + H2O[c] -> ADP[c] + PI[c]		1.9	1.9	1.9	1.9	1.9	1.9	1.9	1.9	1.9	9.38522e-31
r1234	GLC[e] <=> GLC[c]		10	10	10	10	10	10	10	10	10	4.52631e-10
r1235	NH3[e] <=> NH3[c]		2	3	4	5	6	7	8	9	10	-27.5938
r1236	O2[e] <=> O2[c]		10.4984	11.7049	12.9114	14.1178	15.3243	16.5308	17.7372	18.9437	20.1502	-33.291
r1237	H2O[e] <=> H2O[c]		-1000	-1000	-1000	-1000	-1000	-1000	-1000	-1000	-1000	0
r1238	H_PO[e] <=> H_PO[c]		-13.0062	-12.4757	-11.9451	-11.4146	-10.884	-10.3534	-9.82288	-9.29232	-8.76177	-14.6401
r1239	SLF[e] <=> SLF[c]		0	0	0	6.02833e-11	-4.77845e-10	0	0	-4.40783e-10	0	6.35868e-10
r1240	PI[e] <=> PI[c]		0.694532	1.09453	1.49453	1.89453	2.29453	2.69453	3.09453	3.49453	3.89453	-11.0375
r1241	CO2[e] <=> CO2[c]		-19.8976	-19.9023	-19.907	-19.9117	-19.9164	-19.9211	-19.9258	-19.9305	-19.9352	0.129725
r1242	HNO3[e] <=> HNO3[c]		0	0	0	0	0	0	0	0	0	0
r1243	H2SO3[e] <=> H2SO3[c]		0.0173984	0.0173984	0.0173984	0.0173984	0.0173984	0.0173984	0.0173984	0.0173984	0.0173984	1.06087e-09
r1244	TAGLY[c] <=> TAGLY[e]		0.566121	0.529881	0.493641	0.457401	0.421162	0.384922	0.348682	0.312442	0.276202	1
r1245	LPC[e] <=> LPC[c]		0.00176701	0.00176701	0.00176701	0.00176701	0.00176701	0.00176701	0.00176701	0.00176701	0.00176701	9.16526e-34
r1246	ACGLPE[e] <=> ACGLPE[c]		0.0025308	0.0025308	0.0025308	0.0025308	0.0025308	0.0025308	0.0025308	0.0025308	0.0025308	0
r1247	BIOMASS[c] <=> BIOMASS[e]		0.1671	0.1671	0.1671	0.1671	0.1671	0.1671	0.1671	0.1671	0.1671	0
r1248	CO2[c] <=> CO2[m]		-1.35966	-1.74389	-2.12812	-2.51235	-2.89658	-3.28081	-3.66504	-4.04927	-4.4335	10.6024
r1249	H2O[c] <=> H2O[m]		1000	1000	1000	1000	1000	1000	1000	1000	1000	0
r1250	O2[c] <=> O2[m]		1000	1000	1000	1000	1000	1000	1000	1000	1000	0
r1251	NH3[c] <=> NH3[m]		999.973	999.973	999.973	999.973	999.973	999.973	999.973	999.973	999.973	1.18685e-10
r1252	ETH[c] <=> ETH[m]		1000	1000	1000	1000	1000	1000	1000	1000	1000	0
r1253	NADH[c] <=> NADH[m]		0	0	0	0	-1.58762e-13	1.03112e-13	0	0	0	-4.74209e-14
r1254	O2[c] <=> O2[m]		1000	1000	1000	1000	1000	1000	1000	1000	1000	0
r1255	HNO3[c] <=> HNO3[m]		0	0	0	0	0	0	0	0	0	0
r1256	ACAL[c] <=> ACAL[m]		1000	1000	1000	1000	1000	1000	1000	1000	1000	0
r1257	PI[c] <=> PI[m]		1000	1000	1000	1000	1000	1000	1000	1000	1000	0
r1258	OIVAL[c] <=> OIVAL[m]		999.944	999.944	999.944	999.944	999.944	999.944	999.944	999.944	999.944	0
r1259	OMVAL[c] <=> OMVAL[m]		999.973	999.973	999.973	999.973	999.973	999.973	999.973	999.973	999.973	0
r1260	GL3P[c] -> GL3P[m]		0	0	0	0	0	0	0	-8.99828e-10	0	1.24149e-09
r1261	THR[m] <=> THR[c]		999.973	999.973	999.973	999.973	999.973	999.973	999.973	999.973	999.973	1.11758e-09
r1262	PYR[c] <=> PYR[m]		17.472	16.7083	15.9445	15.1808	14.417	13.6532	12.8895	12.1257	11.362	21.0751
r1263	AKG[m] <=> AKG[c]		1000	1000	1000	1000	1000	1000	1000	1000	1000	0
r1264	MYOI[p] <=> MYOI[c]		0	0	0	0	0	0	0	0	0	0
r1265	PS[p] <=> PS[c]		0	0	0	0	0	0	0	0	0	0
r1266	PINS[p] <=> PINS[c]		0	0	0	0	0	0	0	0	0	0
r1267	P5C[m] <=> P5C[c]		1000	1000	1000	1000	1000	1000	1000	1000	1000	0
r1268	GLUGSAL[m] <=> GLUGSAL[c]		-0.044719	-0.044719	-0.044719	-0.044719	-0.044719	-0.044719	-0.044719	-0.044719	-0.044719	-4.23808e-10
r1269	GLUP[m] <=> GLUP[c]		0.044719	0.044719	0.044719	0.044719	0.044719	0.044719	0.044719	0.044719	0.0447191	-2.99447e-08
r1270	SME[m] <=> SME[c]		0.0383042	0.0383042	0.0383042	0.0383042	0.0383042	0.0383042	0.0383042	0.0383042	0.0383042	-6.2599e-10
r1271	DHSK[m] <=> DHSK[c]		-0.0383042	-0.0383042	-0.0383042	-0.0383042	-0.0383042	-0.0383042	-0.0383042	-0.0383042	-0.0383042	-2.47425e-12
r1272	GLN[c] <=> GLN[m]		0	0	0	0	0	0	0	0	0	0
r1273	ACCOA[c] <=> ACCOA[m]		507.049	506.53	506.01	505.49	504.971	504.451	503.932	503.412	502.892	14.3388
r1274	ASP[c] <=> ASP[m]		1000	1000	1000	1000	1000	1000	1000	1000	1000	0
r1275	AC[c] <=> AC[m]		999.761	999.561	999.361	999.161	998.961	998.761	998.561	998.361	998.161	5.51877
r1276	FOR[c] <=> FOR[m]		0	0	0	0	0	0	0	0	0	0
r1277	CO2[x] <=> CO2[c]		0	0	0	0	0	0	0	0	0	0
r1278	H2O[x] <=> H2O[c]		0	0	0	0	0	0	0	0	0	0
r1279	O2[x] <=> O2[c]		0	0	0	0	0	0	0	0	0	0
r1280	ORN[c] <=> ORN[m]		0	0	0	0	0	0	0	0	0	0
r1281	OIVAL[c] <=> OIVAL[m]		999.944	999.944	999.944	999.944	999.944	999.944	999.944	999.944	999.944	0
r1282	IPPMAL[c] <=> IPPMAL[m]		0	0	0	0	0	0	0	0	0	0
r1283	OMVAL[c] <=> OMVAL[m]		999.973	999.973	999.973	999.973	999.973	999.973	999.973	999.973	999.973	0
r1284	THR[m] <=> THR[c]		999.973	999.973	999.973	999.973	999.973	999.973	999.973	999.973	999.973	-5.46161e-10
r1285	OICAP[m] <=> OICAP[c]		0	0	0	0	0	0	0	0	0	0
r1286	CAP[m] <=> CAP[c]		0	0	0	0	0	0	0	0	0	0
r1287	KYN[m] <=> KYN[c]		-1.48534e-13	0	0	0	0	-1.53225e-12	0	0	0	4.31435e-13
r1288	HKYN[m] <=> HKYN[c]		1.48534e-13	0	0	0	-2.30559e-12	1.53225e-12	0	0	0	-4.31435e-13
r1289	DOROA[m] <=> DOROA[c]		0	0	0	0	0	0	0	0	0	0
r1290	OROA[m] <=> OROA[c]		0	0	0	0	0	0	0	0	0	0
r1291	THF[c] <=> THF[m]		1000	1000	1000	1000	1000	1000	1000	1000	1000	-3.89988e-09
r1292	FTHF[c] <=> FTHF[m]		0	0	0	0	0	0	1.15831e-10	0	0	-1.0654e-10
r1293	METTHF[c] <=> METTHF[m]		999.978	999.978	999.978	999.978	999.978	999.978	999.978	999.978	999.978	-2.80767e-10
r1294	METHF[m] <=> METHF[c]		0	0	0	0	0	0	0	0	0	0
r1295	GLY[m] <=> GLY[c]		1000	1000	1000	1000	1000	1000	1000	1000	1000	0
r1296	SER[m] <=> SER[c]		999.978	999.978	999.978	999.978	999.978	999.978	999.978	999.978	999.978	-2.68318e-09
r1297	CITR[m] <=> CITR[c]		0	0	0	0	0	0	0	0	0	0
r1298	GLU[c] <=> GLU[m]		1000	1000	1000	1000	1000	1000	1000	1000	1000	0
r1299	SAM[c] <=> SAM[m]		0	0	0	0	0	0	0	0	0	0
r1300	SAH[c] <=> SAH[m]		0	0	0	0	0	0	0	0	0	0
r1301	PA[c] <=> PA[m]		0	0	0	0	0	0	0	0	0	0
r1302	H3MCOA[c] <=> H3MCOA[m]		-7.1773	-6.75767	-6.33803	-5.91839	-5.49875	-5.07912	-4.65948	-4.23984	-3.82021	-11.5794
r1303	DHF[c] <=> DHF[m]		0.00395144	0.00395144	0.00395144	0.00395144	0.00395144	0.00395144	0.00395144	0.00395144	0.00395144	0
r1304	PROP[c] <=> PROP[m]		0	0	0	0	0	0	0	0	0	0
r1305	PYR[c] -> PYR[m]		1000	1000	1000	1000	1000	1000	1000	1000	1000	0
r1306	SUCC[m] <=> SUCC[c]		1000	1000	1000	1000	1000	1000	1000	1000	1000	0
r1307	FUM[m] <=> FUM[c]		999.818	999.618	999.418	999.218	999.018	998.818	998.618	998.418	998.218	5.51877
r1308	MAL[m] <=> MAL[c]		1000	1000	1000	1000	1000	1000	1000	1000	1000	0
r1309	CIT[m] <=> CIT[c]		1000	1000	1000	1000	1000	1000	1000	1000	1000	0
r1310	ICIT[m] <=> ICIT[c]		1000	1000	1000	1000	1000	1000	1000	1000	1000	0
r1311	AKG[m] <=> AKG[c]		1000	1000	1000	1000	1000	1000	1000	1000	1000	0
r1312	OA[c] <=> OA[m]		1000	1000	1000	1000	1000	1000	1000	1000	1000	0
r1313	SUCC[x] -> SUCC[c]		0	0	0	0	0	0	0	0	0	0
r1314	MAL[x] -> MAL[c]		0	0	0	0	0	2.09091e-11	0	0	0	-9.61602e-12
r1315	HIURTE[x] <=> HIURTE[c]		0	0	0	0	0	0	0	0	0	0
r1316	AKG[x] <=> AKG[c]		0	0	0	0	0	0	0	0	0	0
r1317	ATT[x] <=> ATT[c]		0	0	0	0	0	0	0	0	0	0
r1318	UREA[x] <=> UREA[c]		0	0	0	0	0	0	0	0	0	0
r1319	PYR[x] <=> PYR[c]		0	0	0	0	0	0	0	0	0	0
r1320	PROPCOA[x] <=> PROPCOA[c]		0	0	0	0	0	0	0	0	0	0
r1321	GLAL[x] <=> GLAL[c]		0	0	0	0	0	0	0	0	0	0
r1322	OA[x] <=> OA[c]		0	0	0	0	0	0	0	0	0	0
r1323	XAN[x] <=> XAN[c]		0	0	0	0	0	0	0	0	0	0
r1324	UGC[c] <=> UGC[x]		0	0	0	0	0	0	0	0	0	0
r1325	H2O2[x] <=> H2O2[c]		0	0	0	0	0	0	0	0	0	0
r1326	ADP[c] + PI[c] + ATP[m] -> ATP[c] + PI[m] + ADP[m] + H[m]		0	0	0	0	0	0	0	0	0	0
r1327	CIT[c] + MAL[m] <=> CIT[m] + MAL[c]		1000	1000	1000	1000	1000	1000	1000	1000	1000	0
r1328	CIT[c] + ICIT[m] <=> CIT[m] + ICIT[c]		1000	1000	1000	1000	1000	1000	1000	1000	1000	0
r1329	CIT[c] + PEP[m] <=> PEP[c] + CIT[m]		0	0	0	0	0	0	0	0	0	0
r1330	ICIT[m] + MAL[c] -> ICIT[c] + MAL[m]		1000	1000	1000	1000	1000	1000	1000	1000	1000	0
r1331	CIT[m] + MAL[c] -> CIT[c] + MAL[m]		1000	1000	1000	1000	1000	1000	1000	1000	1000	0
r1332	PI[m] + SUCC[c] -> PI[c] + SUCC[m]		1000	1000	1000	1000	1000	1000	1000	1000	1000	0
r1333	SUCC[m] + MAL[c] <=> SUCC[c] + MAL[m]		1000	1000	1000	1000	1000	1000	1000	1000	1000	0
r1334	PI[m] + MAL[c] <=> PI[c] + MAL[m]		999.955	999.955	999.955	999.955	999.955	999.955	999.955	999.955	999.955	1.80799e-10
r1335	SUCC[c] + FUM[m] -> SUCC[m] + FUM[c]		1000	1000	1000	1000	1000	1000	1000	1000	1000	0
r1336	ICIT[c] + MAL[x] -> MAL[c] + ICIT[x]		0	0	0	0	0	0	0	0	0	0
r1337	ASP[m] + GLU[c] <=> GLU[m] + ASP[c]		1000	1000	1000	1000	1000	1000	1000	1000	1000	0
r1338	AKG[m] + MAL[c] <=> AKG[c] + MAL[m]		1000	1000	1000	1000	1000	1000	1000	1000	1000	0
r1339	GLC[e] <=>		-10	-10	-10	-10	-10	-10	-10	-10	-10	0
r1340	NH3[e] <=>		0	0	0	0	0	0	0	0	0	0
r1341	O2[e] <=>		-10.4984	-11.7049	-12.9114	-14.1178	-15.3243	-16.5308	-17.7372	-18.9437	-20.1502	33.291
r1342	H2O[e] <=>		1000	1000	1000	1000	1000	1000	1000	1000	1000	0
r1343	H_PO[e] <=>		13.0062	12.4757	11.9451	11.4146	10.884	10.3534	9.82288	9.29232	8.76177	14.6401
r1344	NADPH[e] <=>		0	0	0	0	0	0	0	0	0	0
r1345	NADH[e] <=>		0	0	0	0	0	0	0	0	0	0
r1346	SLF[e] <=>		0	0	0	0	0	0	0	0	0	0
r1347	PI[e] <=>		-0.694532	-1.09453	-1.49453	-1.89453	-2.29453	-2.69453	-3.09453	-3.49453	-3.89453	11.0375
r1348	CO2[e] <=>		19.8976	19.9023	19.907	19.9117	19.9164	19.9211	19.9258	19.9305	19.9352	-0.129725
r1349	NH4[e] <=> NH3[e]		2	3	4	5	6	7	8	9	10	-27.5938
r1350	NH4[e] <=>		-2	-3	-4	-5	-6	-7	-8	-9	-10	27.5938
r1351	H2SO3[e] <=>		-0.0173984	-0.0173984	-0.0173984	-0.0173984	-0.0173984	-0.0173984	-0.0173984	-0.0173984	-0.0173984	0
r1352	TAGLY[e] <=>		0.566121	0.529881	0.493641	0.457401	0.421162	0.384922	0.348682	0.312442	0.276202	1
r1353	LPC[e] <=>		-0.00176701	-0.00176701	-0.00176701	-0.00176701	-0.00176701	-0.00176701	-0.00176701	-0.00176701	-0.00176701	-9.16526e-34
r1354	ACGLPE[e] <=>		-0.0025308	-0.0025308	-0.0025308	-0.0025308	-0.0025308	-0.0025308	-0.0025308	-0.0025308	-0.0025308	0
r1355	BIOMASS[e] <=>		0.1671	0.1671	0.1671	0.1671	0.1671	0.1671	0.1671	0.1671	0.1671	0
