# Supplementary material for: Metabolic traits specific for lipid-overproducing strain of Mucor circinelloides WJ11 identified by genome-scale modeling approach
Source: PeerJ. 2019 Jun 7;7:e7015. doi: 10.7717/peerj.7015 (PMC6613434; doi:10.7717/peerj.7015)
Supplement: File S9 — Table S9.1: fastFVA results provide always-active reactions sets. Table S9.2: fastFVA results provide sometimes-active reactions sets. Table S9.3: fastFVA results provide never-active reactions sets. [file peerj-07-7015-s009.xlsx]

## Sheet: always-active
Supplementary File 9: fastFVA results for three types of active reactions sets in iWV1213
Table S9.1: fastFVA results provide always-active reactions sets
Rxn name	Biochemical reaction	EC number	Minimum flux (mmol gDW-1h-1)	Maximum flux (mmol gDW-1h-1)
r5	GLC[c] + ATP[c] -> ADP[c] + G6P[c]	2.7.1.1	2.518	2.518
r9	G6P[c] <=> F6P[c]	5.3.1.9	2.38389	2.38389
r11	ATP[c] + F6P[c] -> ADP[c] + FDP[c]	2.7.1.11	1.95296	1.95296
r12	FDP[c] <=> T3P2[c] + T3P1[c]	4.1.2.13	1.95296	1.95296
r13	T3P2[c] <=> T3P1[c]	5.3.1.1	1.95557	1.95557
r14	T3P1[c] + PI[c] + NAD[c] <=> 13PDG[c] + NADH[c]	1.2.1.12	3.90766	3.90766
r15	ADP[c] + 13PDG[c] <=> ATP[c] + 3PG[c]	2.7.2.3	3.90766	3.90766
r16	3PG[c] <=> 2PG[c]	5.4.2.1	3.90766	3.90766
r17	2PG[c] <=> PEP[c] + H2O[c]	4.2.1.11	3.90766	3.90766
r18	ADP[c] + PEP[c] -> ATP[c] + PYR[c]	2.7.1.40	3.75896	3.75896
r32	RL5P[c] <=> XUL5P[c]	5.1.3.1	-0.359819	-0.359819
r33	RL5P[c] <=> R5P[c]	5.3.1.6	0.359819	0.359819
r34	XUL5P[c] + R5P[c] <=> T3P1[c] + S7P[c]	2.2.1.1	-0.142735	-0.142735
r35	XUL5P[c] + E4P[c] <=> F6P[c] + T3P1[c]	2.2.1.1	-0.217084	-0.217084
r36	T3P1[c] + S7P[c] <=> F6P[c] + E4P[c]	2.2.1.2	-0.142735	-0.142735
r48	NAD[m] + COA[m] + AKG[m] -> NADH[m] + CO2[m] + SUCCOA[m]	1.2.4.2: 2.3.1.61: 1.8.1.4	2.19254	2.19254
r53	SUCC[m] + Q[m] <=> FUM[m] + QH2[m]	1.3.5.1	2.36184	2.36184
r61	CIT[c] <=> OA[c] + AC[c]	4.1.3.6	-1000	-0.137506
r85	ATP[c] + PYR[c] + HCO3[c] -> ADP[c] + PI[c] + OA[c]	6.4.1.1	0.706728	0.706728
r90	2 NAD[c] + H2O[c] + UDPG[c] -> 2 NADH[c] + UDPGE[c]	1.1.1.22	0.133647	0.133647
r117	G1P[c] + UTP[c] <=> PPI[c] + UDPG[c]	2.7.7.9	0.134114	0.134114
r120	G6P[c] <=> G1P[c]	5.4.2.2	0.134114	0.134114
r129	MAN6P[c] <=> F6P[c]	5.3.1.8	-0.0704158	-0.0704158
r137	MAN1P[c] <=> MAN6P[c]	5.4.2.8	-0.0704158	-0.0704158
r139	GTP[c] + MAN1P[c] -> PPI[c] + GDPMAN[c]	2.7.7.13	0.0704158	0.0704158
r141	GDPMAN[c] -> H2O[c] + GDPDDMAN[c]	4.2.1.47	0.0508861	0.0508861
r142	NADPH[c] + GDPDDMAN[c] -> NADP[c] + GDPFUC[c]	1.1.1.271	0.0508861	0.0508861
r162	NAGA6P[c] <=> NAGA1P[c]	5.4.2.3	0.00069508	0.00069508
r163	UTP[c] + NAGA1P[c] <=> PPI[c] + UDPNAG[c]	2.7.7.23	0.00069508	0.00069508
r169	GDPMAN[c] -> MANNAN[c]	2.4.1.-	0.0195297	0.0195297
r170	MANNAN[c] -> MAN[c]	3.2.1.113; 3.2.1.24	0.0195297	0.0195297
r174	UDPG[c] -> UDP[c] + GLYNIN[c]	2.4.1.11	0.000466845	0.000466843
r197	UDPNAG[c] -> UDP[c] + CHIT[c]	2.4.1.16	0.00069508	0.00069508
r200	H2O[c] + CHIT[c] -> AC[c] + CHITO[c]	3.5.1.41	2.59358e-05	2.59358e-05
r242	PPI[c] -> 2 PI[c]	3.6.1.1	3.66587	3.67372
r245	NADH[m] + Q[m] + 4 H_PO[m] -> NAD[m] + QH2[m] + 4 H_PO[c]	1.6.5.3: 1.6.99.3	11.7397	11.7397
r248	QH2[m] + 2 FERI[m] + 4 H_PO[m] -> Q[m] + 2 FERO[m] + 4 H_PO[c]	1.10.2.2	14.1015	14.1015
r252	2 FERO[m] + 0.5 O2[m] + 4 H_PO[m] -> H2O[m] + 2 FERI[m] + 4 H_PO[c]	1.9.3.1	14.1015	14.1015
r256	3 NADPH[c] + H2SO3[c] -> 3 H2O[c] + 3 NADP[c] + H2S[c]	1.8.1.2	0.0333288	0.0333288
r259	PI[m] + ADP[m] + 3.87 H_PO[c] -> H2O[m] + ATP[m] + 3.87 H_PO[m]	3.6.3.14	32.3736	1000
r260	ADP[c] + PI[c] + H2O[m] + ATP[m] + H_PO[c] -> ATP[c] + H2O[c] + PI[m] + ADP[m] + H_PO[m]		34.4849	34.4849
r272	H2O[c] + CO2[c] -> HCO3[c] + H_PO[c]	4.2.1.1	0.91705	0.91705
r282	ATP[c] + ASP[c] + GLN[c] -> AMP[c] + PPI[c] + GLU[c] + ASN[c]	6.3.5.4	0.0393109	0.0393109
r283	NADPH[c] + BASP[c] -> PI[c] + NADP[c] + ASPSA[c]	1.2.1.11	0.226357	0.226357
r284	ATP[c] + ASP[c] -> ADP[c] + BASP[c]	2.7.2.4	0.226357	0.226357
r297	ORN[c] + CAP[c] -> PI[c] + CITR[c]	2.1.3.3	0.0410201	0.0410201
r298	ATP[c] + ASP[c] + CITR[c] <=> AMP[c] + PPI[c] + ARGSUCC[c]	6.3.4.5	0.0410201	0.0410201
r299	ARGSUCC[c] <=> FUM[c] + ARG[c]	4.3.2.1	0.0410201	0.0410201
r302	ATP[m] + GLU[m] -> ADP[m] + GLUP[m]	2.7.2.11	0.0811856	0.0811856
r304	NADPH[c] + GLUP[c] -> PI[c] + NADP[c] + GLUGSAL[c]	1.2.1.41	0.0811856	0.0811856
r306	GLUGSAL[m] <=> H2O[m] + P5C[m]		0.0811856	1000
r308	NADPH[c] + P5C[c] <=> NADP[c] + PRO[c]	1.5.1.2	0.0811856	1000
r320	ORN[c] <=> NH3[c] + PRO[c]	4.3.1.12	-999.96	-0.0410201
r330	ACCOA[c] + HSER[c] -> COA[c] + OAHSER[c]	2.3.1.31	0.0213646	0.0213646
r331	ACCOA[c] + SER[c] -> COA[c] + ASER[c]	2.3.1.30	0.0119642	0.0119642
r333	H2S[c] + ASER[c] -> AC[c] + CYS[c]	2.5.1.47	0.0119642	0.0119642
r347	ACCOA[c] + GA6P[c] <=> COA[c] + NAGA6P[c]	2.3.1.4	0.00069508	999.863
r351	ATP[c] + NH3[c] + GLU[c] -> ADP[c] + PI[c] + GLN[c]	6.3.1.2	0.615853	0.623704
r352	F6P[c] + GLN[c] -> GA6P[c] + GLU[c]	2.6.1.16	0.00069508	0.00069508
r362	NADPH[c] + ASPSA[c] -> NADP[c] + HSER[c]	1.1.1.3	0.226357	0.226357
r364	ATP[c] + HSER[c] -> ADP[c] + PHSER[c]	2.7.1.39	0.204993	0.204993
r379	H2O[c] + PHSER[c] -> PI[c] + THR[c]	4.2.3.1	0.204993	0.204993
r381	THR[m] -> NH3[m] + OBUT[m]	4.3.1.19	0.049566	0.049566
r386	SER[c] <=> PYR[c] + NH3[c]	4.3.1.19	-1000	-0.329942
r387	PRFP[c] -> PRLP[c]	5.3.1.16	0.0222192	0.0222192
r388	GLU[c] + IMACP[c] -> AKG[c] + HISOLP[c]	2.6.1.9	0.0222192	0.0222192
r389	HISOLP[c] -> PI[c] + HISOL[c]	3.1.3.15	0.0222192	0.0222192
r390	2 NAD[c] + HISOL[c] -> 2 NADH[c] + HIS[c]	1.1.1.23	0.0222192	0.0222192
r391	ATP[c] + PRPP[c] -> PPI[c] + PRBATP[c]	2.4.2.17	0.0222192	0.0222192
r392	DIMGP[c] -> IMACP[c]	4.2.1.19	0.0222192	0.0222192
r395	PRBATP[c] -> PPI[c] + PRBAMP[c]	3.6.1.31	0.0222192	0.0222192
r396	PRBAMP[c] -> PRFP[c]	3.5.4.19	0.0222192	0.0222192
r397	GLN[c] + PRLP[c] -> GLU[c] + DIMGP[c] + AICAR[c]	2.4.2.-; 4.1.3.-	0.0222192	0.0222192
r398	AKG[c] + ILE[c] <=> GLU[c] + OMVAL[c]	2.6.1.42	-0.049566	-0.049566
r400	AKG[c] + VAL[c] <=> GLU[c] + OIVAL[c]	2.6.1.42	-0.0623847	-0.0623847
r402	AKG[c] + LEU[c] <=> GLU[c] + OICAP[c]	2.6.1.42	-0.0777673	-0.0777673
r404	PYR[m] + OBUT[m] -> CO2[m] + ABUT[m]	2.2.1.6	0.049566	0.049566
r406	2 PYR[m] -> CO2[m] + ACLAC[m]	2.2.1.6	0.140152	0.140152
r409	NADPH[m] + ACLAC[m] -> NADP[m] + DHVAL[m]	1.1.1.86	0.140152	0.140152
r410	NADPH[m] + ABUT[m] -> NADP[m] + DHMVA[m]	1.1.1.86	0.049566	0.049566
r411	DHVAL[m] -> OIVAL[m]	4.2.1.9	0.140152	0.140152
r413	DHMVA[m] -> OMVAL[m]	4.2.1.9	0.049566	0.049566
r415	ACCOA[c] + OIVAL[c] -> COA[c] + IPPMAL[c]	2.3.3.13	0.0777673	0.0777673
r418	NAD[c] + IPPMAL[c] -> NADH[c] + CO2[c] + OICAP[c]	1.1.1.85	0.0777673	0.0777673
r451	H2O[c] + AKG[c] + ACCOA[c] -> COA[c] + HCIT[c]	2.3.3.14	0.0512751	0.0512751
r453	HCIT[c] <=> HICIT[c]	4.2.1.36	0.0512751	0.0512751
r454	NAD[c] + HICIT[c] <=> NADH[c] + CO2[c] + AKA[c]	1.1.1.87	0.0512751	0.0512751
r456	ATP[c] + NADPH[c] + AMA[c] -> NADP[c] + AMP[c] + PPI[c] + AMASA[c]	1.2.1.31	0.0512751	0.0512751
r458	NADPH[c] + GLU[c] + AMASA[c] <=> NADP[c] + SACP[c]	1.5.1.10	0.0512751	0.0512751
r462	NADH[c] + AKG[c] + LYS[c] <=> NAD[c] + SACP[c]	1.5.1.7	-0.0512751	-0.0512751
r473	GLU[c] + AKA[c] <=> AKG[c] + AMA[c]	2.6.1.39	0.0512751	0.0512751
r482	HCYS[c] + MTHF[c] -> THF[c] + MET[c]	2.1.1.13	0.0272515	0.0272515
r483	ATP[c] + MET[c] -> PI[c] + PPI[c] + SAM[c]	2.5.1.6	0.00588689	0.00588689
r484	SAH[c] -> HCYS[c] + ADN[c]	3.3.1.1	0.00588689	0.00588689
r485	H2S[c] + OAHSER[c] -> AC[c] + HCYS[c]	2.5.1.49	0.0213646	0.0213646
r492	PEP[c] + E4P[c] -> PI[c] + 3DDAH7P[c]	2.5.1.54	0.0743489	0.0743489
r493	3DDAH7P[c] -> PI[c] + DQT[c]	4.2.3.4	0.0743489	0.0743489
r494	DQT[c] -> DHSK[c]	4.2.1.10	0.0743489	0.0743489
r495	NADPH[m] + DHSK[m] -> NADP[m] + SME[m]	1.1.1.25	0.0743489	0.0743489
r496	ATP[c] + SME[c] -> ADP[c] + SME3P[c]	2.7.1.71	0.0743489	0.0743489
r497	PEP[c] + SME3P[c] -> PI[c] + 3PSME[c]	2.5.1.19	0.0743489	0.0743489
r498	3PSME[c] -> PI[c] + CHOR[c]	4.2.3.5	0.0743489	0.0743489
r500	GLN[c] + CHOR[c] -> PYR[c] + GLU[c] + AN[c]	4.1.3.27	0.010255	0.010255
r502	PRPP[c] + AN[c] -> PPI[c] + NPRAN[c]	2.4.2.18	0.216218	0.216218
r503	NPRAN[c] -> CPAD5P[c]	5.3.1.24	0.216218	0.216218
r504	CPAD5P[c] -> CO2[c] + IGP[c]	4.1.1.48	0.216218	0.216218
r505	SER[c] + IGP[c] -> T3P1[c] + TRP[c]	4.2.1.20	0.216218	0.216218
r506	O2[c] + TRP[c] -> FKYN[c]	1.13.11.52	0.205963	0.205963
r507	FKYN[c] -> FOR[c] + KYN[c]	3.5.1.9	0.205963	0.205963
r509	KYN[c] -> ALA[c] + AN[c]	3.7.1.3	0.205963	0.205963
r512	CHOR[c] -> PHEN[c]	5.4.99.5	0.0640939	0.0640939
r513	NADP[c] + PHEN[c] -> CO2[c] + NADPH[c] + 4HPP[c]	1.3.1.13	0.0290559	0.0290559
r540	PHEN[c] -> CO2[c] + PHPYR[c]	4.2.1.51	0.035038	0.035038
r541	GLU[c] + PHPYR[c] <=> AKG[c] + PHE[c]	2.6.1.57	0.035038	0.035038
r544	ATP[c] + R5P[c] <=> AMP[c] + PRPP[c]	2.7.6.1	0.502555	0.502555
r547	CAIR[c] <=> CO2[c] + AIR[c]	4.1.1.21	-0.0948154	-0.0948154
r548	ATP[c] + ASP[c] + CAIR[c] <=> ADP[c] + PI[c] + SAICAR[c]	6.3.2.6	0.0948154	0.0948154
r549	SAICAR[c] <=> FUM[c] + AICAR[c]	4.3.2.2	0.0948154	0.0948154
r550	ATP[c] + FGAM[c] -> ADP[c] + PI[c] + AIR[c]	6.3.3.1	0.0948154	0.0948154
r551	ATP[c] + GLY[c] + PRAM[c] <=> ADP[c] + PI[c] + GAR[c]	6.3.4.13	0.0948154	0.0948154
r552	ATP[c] + GLN[c] + FGAR[c] -> ADP[c] + PI[c] + GLU[c] + FGAM[c]	6.3.5.3	0.0948154	0.0948154
r553	GAR[c] + FTHF[c] -> THF[c] + FGAR[c]	2.1.2.2	0.0948154	0.0948154
r554	GLN[c] + PRPP[c] -> PPI[c] + GLU[c] + PRAM[c]	2.4.2.14	0.0948154	0.0948154
r555	AICAR[c] + FTHF[c] <=> THF[c] + PRFICA[c]	2.1.2.3	0.117035	0.117035
r556	PRFICA[c] <=> IMP[c]	3.5.4.10	0.117035	0.117035
r557	GTP[c] + ASP[c] + IMP[c] -> PI[c] + GDP[c] + ASUC[c]	6.3.4.4	0.030044	0.030044
r558	ASUC[c] <=> FUM[c] + AMP[c]	4.3.2.2	0.030044	0.030044
r559	ATP[c] + GLN[c] + XMP[c] -> AMP[c] + PPI[c] + GLU[c] + GMP[c]	6.3.5.2	0.0869906	0.0869906
r574	NAD[c] + IMP[c] -> NADH[c] + XMP[c]	1.1.1.205	0.0869906	0.0869906
r588	ASP[c] + CAP[c] -> PI[c] + CAASP[c]	2.1.3.2	0.169302	0.169302
r589	CAASP[c] <=> DOROA[c]	3.5.2.3	0.169302	0.169302
r591	PRPP[c] + OROA[c] <=> PPI[c] + OMP[c]	2.4.2.10	0.169302	0.169302
r592	OMP[c] -> CO2[c] + UMP[c]	4.1.1.23	0.169302	0.169302
r607	METTHF[c] + DUMP[c] -> DHF[c] + DTMP[c]	2.1.1.45	0.0078507	0.0078507
r608	ATP[c] + UTP[c] + GLN[c] -> ADP[c] + PI[c] + GLU[c] + CTP[c]	6.3.4.2	0.0171188	0.0249695
r611	2 ATP[c] + HCO3[c] + GLN[c] -> 2 ADP[c] + PI[c] + GLU[c] + CAP[c]	6.3.5.5	0.210322	0.210322
r615	NADPH[c] + OTHIO[c] -> NADP[c] + RTHIO[c]	1.8.1.9	0.0259099	0.0259099
r617	FUM[c] + DOROA[c] <=> SUCC[c] + OROA[c]	1.3.98.1	0.169302	0.169302
r626	ATP[c] + ADN[c] -> ADP[c] + AMP[c]	2.7.1.20	0.00588689	0.00588689
r627	ATP[c] + AMP[c] <=> 2 ADP[c]	2.7.4.3	3.43315	3.43315
r631	ATP[c] + DGDP[c] <=> ADP[c] + DGTP[c]	2.7.4.6	0.00513016	0.00513016
r635	ATP[c] + DCDP[c] <=> ADP[c] + DCTP[c]	2.7.4.6	0.00510425	0.00510425
r637	ATP[c] + DTDP[c] <=> ADP[c] + DTTP[c]	2.7.4.6	0.0078507	0.0078507
r641	ATP[c] + UDP[c] <=> ADP[c] + UTP[c]	2.7.4.6	0.162613	0.205785
r662	ADP[c] + RTHIO[c] -> OTHIO[c] + DADP[c]	1.17.4.1	0.00782479	0.00782479
r663	GDP[c] + RTHIO[c] -> OTHIO[c] + DGDP[c]	1.17.4.1	0.00513016	0.00513016
r664	RTHIO[c] + CDP[c] -> OTHIO[c] + DCDP[c]	1.17.4.1	0.00510425	0.0129549
r666	ATP[c] + DTMP[c] <=> ADP[c] + DTDP[c]	2.7.4.9	0.0078507	0.0078507
r671	ATP[c] + UMP[c] <=> ADP[c] + UDP[c]	2.7.4.14	0.169302	0.169302
r675	COA[c] + H3MCOA[c] <=> ACCOA[c] + AACCOA[c]	2.3.3.10	0.0991938	500.03
r676	COA[m] + H3MCOA[m] <=> ACCOA[m] + AACCOA[m]	2.3.3.10	-500.066	-0.134515
r677	2 NADP[c] + COA[c] + MVL[c] <=> 2 NADPH[c] + H3MCOA[c]	1.1.1.34	-0.0353213	-0.0353213
r682	ATP[c] + PMVL[c] -> ADP[c] + PPMVL[c]	2.7.4.2	0.0353213	0.0353213
r683	ATP[c] + PPMVL[c] -> ADP[c] + PI[c] + CO2[c] + IPPP[c]	4.1.1.33	0.0353213	0.0353213
r684	IPPP[c] <=> DMPP[c]	5.3.3.2	0.0117738	0.0117738
r685	IPPP[c] + DMPP[c] -> PPI[c] + GPP[c]	2.5.1.1	0.0117738	0.0117738
r686	IPPP[c] + GPP[c] -> PPI[c] + FPP[c]	2.5.1.10	0.0117738	0.0117738
r688	NADPH[c] + 2 FPP[c] -> NADP[c] + 2 PPI[c] + SQL[c]	2.5.1.21	0.00588689	0.00588689
r690	NADPH[c] + O2[c] + SQL[c] <=> NADP[c] + S23E[c]	1.14.13.132	0.00588689	0.00588689
r691	S23E[c] -> LNST[c]	5.4.99.7	0.00588689	0.00588689
r692	3 NADPH[c] + 3 O2[c] + LNST[c] -> 4 H2O[c] + 3 NADP[c] + FOR[c] + 44MACHL[c]	1.14.13.70	0.00588689	0.00588689
r693	NADPH[c] + 44MACHL[c] -> NADP[c] + 14MLNST[c]	1.3.1.70	0.00588689	0.00588689
r694	3 NADPH[c] + 3 O2[c] + 14MLNST[c] -> 3 NADP[c] + ICZYMST[c]	1.14.13.72	0.00588689	0.00588689
r695	NADP[c] + ICZYMST[c] -> CO2[c] + NADPH[c] + IIZYMST[c]	1.1.1.170	0.00588689	0.00588689
r696	NADPH[c] + IIZYMST[c] -> NADP[c] + ZYMST[c]	1.1.1.270	0.00588689	0.00588689
r698	SAM[c] + ZYMST[c] -> SAH[c] + FEST[c]	2.1.1.41	0.00588689	0.00588689
r699	FEST[c] -> EPST[c]	5.3.3.-	0.00588689	0.00588689
r700	NADPH[c] + O2[c] + EPST[c] -> NADP[c] + ERGOTRI[c]	1.3.3.-	0.00588689	0.00588689
r701	NADPH[c] + O2[c] + ERGOTRI[c] -> NADP[c] + ERGOTET[c]	1.14.14.-	0.00588689	0.00588689
r702	NADPH[c] + ERGOTET[c] -> NADP[c] + ERGOST[c]	1.3.1.71	0.00588689	0.00588689
r703	ERGOST[c] + 0.076 C160COA[c] + 0.312 C181COA[c] + 0.281 C182COA[c] + 0.317 C183COA[c] + 0.014 C180COA[c] -> COA[c] + ERGOSE[c]	2.3.1.26	0.00588689	0.00588689
r713	H2O[c] + MAGLY[c] -> GL[c] + 0.272 C160[c] + 0.1534 C181[c] + 0.6673 C182[c] + 0.0404 C183[c] + 0.0304 C180[c] + 0.0051 C161[c]	3.1.1.23	0.00261101	0.00261101
r714	H2O[c] + TAGLY[c] -> 0.3544 C160[c] + 0.3423 C181[c] + 0.1421 C182[c] + 0.1201 C183[c] + 0.041 C180[c] + DAGLY[c]	3.1.1.3	4.42021	4.42021
r716	H2O[c] + DAGLY[c] -> 0.2938 C160[c] + 0.3994 C181[c] + 0.1544 C182[c] + 0.1295 C183[c] + 0.0229 C180[c] + MAGLY[c]	3.1.1.3	0.00261101	0.00261101
r720	0.3544 C160COA[c] + 0.3423 C181COA[c] + 0.1421 C182COA[c] + 0.1201 C183COA[c] + 0.041 C180COA[c] + DAGLY[c] -> COA[c] + TAGLY[c]	2.3.1.20	4.40217	4.40217
r723	ATP[c] + GL[c] -> ADP[c] + GL3P[c]	2.7.1.30	0.00261101	0.00261101
r726	NAD[c] + GL3P[c] -> T3P2[c] + NADH[c]	1.1.1.8	0.00261101	0.00261101
r764	ATP[c] + DAGLY[c] -> ADP[c] + PA[c]	2.7.1.107	0.000341675	0.000341676
r772	0.057 C160COA[c] + 0.211 C181COA[c] + 0.357 C182COA[c] + 0.361 C183COA[c] + 0.014 C180COA[c] + LPC[c] -> COA[c] + PC[c]	2.3.1.23	0.00159248	0.00159248
r787	PS[c] -> CO2[c] + PE[c]	4.1.1.65	0.00212997	0.00212997
r790	0.2827 C160COA[c] + 0.3435 C181COA[c] + 0.1388 C182COA[c] + 0.2239 C183COA[c] + 0.0111 C180COA[c] + ACGLPE[c] -> COA[c] + PS[c]		0.00228083	0.00228083
r791	0.5488 C160COA[c] + 0.2336 C181COA[c] + 0.145 C182COA[c] + 0.0504 C183COA[c] + 0.0222 C180COA[c] -> COA[c] + PINS[c]		0.0108974	0.0108974
r846	H2O[c] + C160ACP[c] <=> C160[c] + ACP[c]	3.1.2.14	-1000	-1.568
r857	H2O[c] + C180ACP[c] <=> C180[c] + ACP[c]	3.1.2.14	-0.181368	-0.181368
r862	NADH[c] + O2[c] + C180COA[c] -> NAD[c] + 2 H2O[c] + C181COA[c]	1.14.19.1	0.000427826	0.000427826
r864	NADH[c] + O2[c] + C181COA[c] -> NAD[c] + 2 H2O[c] + C182COA[c]	1.14.19.6	0.00214681	0.00214681
r866	NADH[c] + O2[c] + C182COA[c] -> NAD[c] + 2 H2O[c] + C183COA[c]	1.14.19.6	0.000995196	0.000995196
r868	ATP[c] + COA[c] + C161[c] -> AMP[c] + PPI[c] + C161COA[c]	6.2.1.3	1.33162e-05	1.33162e-05
r871	ATP[c] + COA[c] + C181[c] -> AMP[c] + PPI[c] + C181COA[c]	6.2.1.3	1.51448	1.51448
r874	ATP[c] + COA[c] + C182[c] -> AMP[c] + PPI[c] + C182COA[c]	6.2.1.3	0.630258	0.630258
r877	ATP[c] + COA[c] + C183[c] -> AMP[c] + PPI[c] + C183COA[c]	6.2.1.3	0.531311	0.531311
r880	0.272 C160COA[c] + 0.1534 C181COA[c] + 0.6673 C182COA[c] + 0.0404 C183COA[c] + 0.0304 C180COA[c] + 0.0051 C161COA[c] -> COA[c] + FFA[c]		0.00261101	0.00261101
r931	COA[c] + C160ACP[c] <=> C160COA[c] + ACP[c]	2.3.1.38	1.568	1000
r932	COA[c] + C180ACP[c] <=> C180COA[c] + ACP[c]	2.3.1.38	0.181368	0.181368
r1011	COA[m] + AACCOA[m] <=> 2 ACCOA[m]	2.3.1.9	-500.066	-0.134515
r1012	COA[c] + AACCOA[c] <=> 2 ACCOA[c]	2.3.1.9	0.0991938	500.03
r1015	ATP[c] + FOR[c] + THF[c] -> ADP[c] + PI[c] + FTHF[c]	6.3.4.3	0.21185	0.21185
r1032	NADPH[c] + METTHF[c] -> NADP[c] + MTHF[c]	1.5.1.20	0.0272515	0.0272515
r1144	5.168 ATP[c] + 0.059 GLU[c] + 0.058 ASP[c] + 0.073 ALA[c] + 0.052 GLY[c] + 0.046 GLN[c] + 0.046 ASN[c] + 0.048 ARG[c] + 0.047 PRO[c] + 0.014 CYS[c] + 0.078 SER[c] + 0.06 THR[c] + 0.026 HIS[c] + 0.058 ILE[c] + 0.073 VAL[c] + 0.091 LEU[c] + 0.034 TYR[c] + 0.06 LYS[c] + 0.025 MET[c] + 0.012 TRP[c] + 0.041 PHE[c] -> 5.168 ADP[c] + 5.168 PI[c] + Protein[c]		0.854585	0.854585
r1145	2.544 ATP[c] + 0.241 GTP[c] + 0.225 UTP[c] + 0.253 CTP[c] -> 2.544 ADP[c] + 2.544 PI[c] + RNA[c]		0.0474885	0.0474885
r1146	3.739 ATP[c] + 0.302 DATP[c] + 0.198 DGTP[c] + 0.197 DCTP[c] + 0.303 DTTP[c] -> 3.739 ADP[c] + 3.739 PI[c] + DNA[c]		0.0259099	0.0259099
r1147	0.11785 ERGOSE[c] + 0.725 TAGLY[c] + 0.01955 DAGLY[c] + 0.03188 PC[c] + 0.00684 PA[c] + 0.04264 PE[c] + 0.00302 PS[c] + 0.05227 FFA[c] + 0.00093 PINS[c] -> Lipid[c]		0.0499524	0.0499524
r1148	80 ATP[c] + 0.5153 UDPGE[c] + 0.1962 GDPFUC[c] + 0.0753 MAN[c] + 0.0018 GLYNIN[c] + 0.00258 CHIT[c] + 0.0001 CHITO[c] + 3.2950 Protein[c] + 0.1831 RNA[c] + 0.0999 DNA[c] + 0.1926 Lipid[c] -> 80 ADP[c] + 80 PI[c] + BIOMASS[c]		0.259358	0.259358
r1149	ATP[c] + H2O[c] -> ADP[c] + PI[c]		1.9	1.9
r1150	GLC[e] <=> GLC[c]		2.518	2.518
r1152	NH3[e] <=> NH3[c]		1.99359	1.99359
r1153	O2[e] <=> O2[c]		7.31327	7.31327
r1154	H2O[e] <=> H2O[c]		-1000	-1000
r1155	H_PO[e] <=> H_PO[c]		-0.91705	-0.91705
r1157	PI[e] <=> PI[c]		0.58863	0.58863
r1158	CO2[e] <=> CO2[c]		-6.95336	-6.95336
r1160	H2SO3[e] <=> H2SO3[c]		0.0333288	0.0333288
r1179	DAGLY[c] <=> DAGLY[e]		0.0141192	0.0141192
r1185	PINS[c] <=> PINS[e]		0.010851	0.010851
r1187	LPC[e] <=> LPC[c]		0.00159248	0.00159248
r1188	ACGLPE[e] <=> ACGLPE[c]		0.00228083	0.00228083
r1191	TAGLY[e] <=> TAGLY[c]		0.0542639	1000
r1193	BIOMASS[c] <=> BIOMASS[e]		0.259358	0.259358
r1194	CO2[c] <=> CO2[m]		-7.34323	-2.38225
r1213	P5C[m] <=> P5C[c]		0.0811856	1000
r1214	GLUGSAL[m] <=> GLUGSAL[c]		-1000	-0.0811856
r1215	GLUP[m] <=> GLUP[c]		0.0811856	0.0811856
r1216	SME[m] <=> SME[c]		0.0743489	0.0743489
r1217	DHSK[m] <=> DHSK[c]		-0.0743489	-0.0743489
r1219	ACCOA[c] <=> ACCOA[m]		0.134515	500.066
r1248	H3MCOA[c] <=> H3MCOA[m]		-500.066	-0.134515
r1285	GLC[e] <=>		-2.518	-2.518
r1299	NH3[e] <=>		-1.99359	-1.99359
r1300	O2[e] <=>		-7.31327	-7.31327
r1301	H2O[e] <=>		1000	1000
r1302	H_PO[e] <=>		0.91705	0.91705
r1306	PI[e] <=>		-0.58863	-0.58863
r1307	CO2[e] <=>		6.95336	6.95336
r1312	H2SO3[e] <=>		-0.0333288	-0.0333288
r1315	DAGLY[e] <=>		0.0141192	0.0141192
r1321	PINS[e] <=>		0.010851	0.010851
r1322	LPC[e] <=>		-0.00159248	-0.00159248
r1325	TAGLY[e] <=>		-0.0542639	-0.0542639
r1326	ACGLPE[e] <=>		-0.00228083	-0.00228083
r1327	BIOMASS[e] <=>		0.259358	0.259358

## Sheet: sometimes-active
Supplementary File 9: fastFVA results for three types of active reactions sets in iWV1213
Table S9.2: fastFVA results provide sometimes-active reactions sets
Rxn name	Biochemical reaction	EC number	Minimum flux (mmol gDW-1h-1)	Maximum flux (mmol gDW-1h-1)
r21	ETH[c] + NADP[c] <=> ACAL[c] + NADPH[c]	1.1.1.2	-1000	1000
r22	NAD[c] + ETH[c] <=> NADH[c] + ACAL[c]	1.1.1.1	-1000	1000
r23	ETH[m] + NAD[m] <=> ACAL[m] + NADH[m]	1.1.1.1	-998.781	1000
r24	NADP[c] + GL[c] <=> NADPH[c] + GLYAL[c]	1.1.1.2	-1000	1000
r25	NAD[c] + GL[c] <=> NADH[c] + GLYAL[c]	1.1.1.1	-1000	1000
r28	NAD[m] + PYR[m] + COA[m] -> NADH[m] + ACCOA[m] + CO2[m]	1.2.4.1: 2.3.1.12: 1.8.1.4	0	2.54625
r41	ACCOA[m] + H2O[m] + OA[m] <=> COA[m] + CIT[m]	2.3.3.1	-997.585	2.27722
r42	CIT[m] <=> H2O[m] + ACO[m]	4.2.1.3	-997.585	2.41473
r43	CIT[c] <=> H2O[c] + ACO[c]	4.2.1.3	0	1000
r44	H2O[m] + ACO[m] <=> ICIT[m]	4.2.1.3	-997.585	2.41473
r45	H2O[c] + ACO[c] <=> ICIT[c]	4.2.1.3	0	1000
r46	NAD[m] + ICIT[m] -> NADH[m] + CO2[m] + AKG[m]	1.1.1.41	0	2.41473
r47	NADP[c] + ICIT[c] -> CO2[c] + NADPH[c] + AKG[c]	1.1.1.42	0	2.41473
r49	SUCCOA[m] + GDP[m] + PI[m] <=> COA[m] + GTP[m] + SUCC[m]	6.2.1.4	-997.807	1000
r50	PI[c] + SUCCOA[c] + GDP[c] <=> COA[c] + GTP[c] + SUCC[c]	6.2.1.4	-1000	1000
r51	SUCCOA[m] + PI[m] + ADP[m] <=> COA[m] + SUCC[m] + ATP[m]	6.2.1.5	-997.807	1000
r52	ADP[c] + PI[c] + SUCCOA[c] <=> ATP[c] + COA[c] + SUCC[c]	6.2.1.5	-1000	1000
r56	H2O[c] + FUM[c] <=> MAL[c]	4.2.1.2	-997.642	1000
r57	H2O[m] + FUM[m] <=> MAL[m]	4.2.1.2	-997.642	1000
r58	NAD[m] + MAL[m] <=> NADH[m] + OA[m]	1.1.1.37	-997.642	2.35841
r59	NAD[c] + MAL[c] <=> NADH[c] + OA[c]	1.1.1.37	0	1000
r69	PYR[c] -> CO2[c] + ACAL[c]	4.1.1.1	0	2.54625
r75	NAD[c] + H2O[c] + ACAL[c] <=> NADH[c] + AC[c]	1.2.1.3	-999.896	1000
r76	NAD[m] + ACAL[m] + H2O[m] <=> NADH[m] + AC[m]	1.2.1.3	-1000	1000
r79	ACAL[m] + H2O[m] + NADP[m] <=> AC[m] + NADPH[m]	1.2.1.5	-1000	1000
r81	H2O[c] + ACCOA[c] -> COA[c] + AC[c]	3.1.2.1	0	999.862
r107	NADP[m] + C4HCOA[m] <=> NADPH[m] + AACCOA[m]	1.1.1.157	0	1000
r109	H2O[m] + CRONYLCOA[m] <=> C4HCOA_R[m]	4.2.1.55	-1000	41.0711
r110	C4HCOA_R[m] <=> C4HCOA[m]	5.1.2.3	-1000	41.0711
r111	CRONYLCOA[m] <=> C4HCOA[m]	4.2.1.17	-41.0711	1000
r193	H2O[c] + NAGA6P[c] -> AC[c] + GA6P[c]	3.5.1.25	0	999.862
r247	H2O[m] + ATP[m] + 3.87 H_PO[m] -> PI[m] + ADP[m] + 3.87 H_PO[c]	3.6.3.6	0	967.626
r273	OA[m] + GLU[m] <=> AKG[m] + ASP[m]	2.6.1.1	-999.35	1000
r274	OA[c] + GLU[c] <=> AKG[c] + ASP[c]	2.6.1.1	-999.35	1000
r275	PYR[c] + GLU[c] <=> AKG[c] + ALA[c]	2.6.1.2	-0.143578	999.856
r276	PYR[m] + GLU[m] <=> AKG[m] + ALA[m]	2.6.1.2	-1000	1000
r312	AKG[c] + ORN[c] -> GLU[c] + GLUGSAL[c]	2.6.1.13	0	999.919
r328	SER[m] -> PYR[m] + NH3[m]	4.3.1.17	0	999.67
r329	SER[c] -> PYR[c] + NH3[c]	4.3.1.17	0	999.67
r344	NAD[c] + GLU[c] <=> NADH[c] + AKG[c] + NH3[c]	1.4.1.2	-41.0711	1000
r345	H2O[m] + NADP[m] + GLU[m] <=> AKG[m] + NADPH[m] + NH3[m]	1.4.1.3	-1000	999.95
r346	H2O[c] + NADP[c] + GLU[c] <=> NADPH[c] + AKG[c] + NH3[c]	1.4.1.3	-1000	1000
r368	SER[m] + THF[m] <=> GLY[m] + METTHF[m]	2.1.2.1	-999.965	1000
r369	SER[c] + THF[c] <=> GLY[c] + METTHF[c]	2.1.2.1	-999.965	1000
r374	SER[m] + HCYS[m] -> LLCT[m]	4.2.1.22	0	999.67
r401	AKG[m] + VAL[m] <=> GLU[m] + OIVAL[m]	2.6.1.42	-1000	1000
r408	ALA[m] + OIVAL[m] <=> PYR[m] + VAL[m]	2.6.1.66	-1000	1000
r455	AKG[c] + TYR[c] <=> GLU[c] + 4HPP[c]	2.6.1.5	-1000	999.971
r460	AKG[m] + NADPH[m] + LYS[m] <=> NADP[m] + SACP[m]	1.5.1.8	-1000	1000
r461	NADH[m] + AKG[m] + LYS[m] <=> NAD[m] + SACP[m]	1.5.1.7	-1000	1000
r463	NAD[c] + H2O[c] + ALA[c] -> NADH[c] + PYR[c] + NH3[c]	1.4.1.1	0	1000
r464	NAD[m] + H2O[m] + ALA[m] -> NADH[m] + PYR[m] + NH3[m]	1.4.1.1	0	1000
r480	H2O[m] + LLCT[m] -> PYR[m] + NH3[m] + HCYS[m]	4.4.1.8	0	999.67
r514	AKG[c] + TYR[c] <=> GLU[c] + 4HPP[c]	2.6.1.1	-1000	999.971
r560	ATP[c] + GMP[c] <=> ADP[c] + GDP[c]	2.7.4.8	-999.905	1000
r562	GMP[c] + DATP[c] <=> GDP[c] + DADP[c]	2.7.4.8	-999.913	999.992
r600	ATP[c] + URI[c] -> ADP[c] + UMP[c]	2.7.1.48	0	1000
r602	ATP[m] + URI[m] -> ADP[m] + UMP[m]	2.7.1.48	0	1000
r639	ATP[c] + DADP[c] <=> ADP[c] + DATP[c]	2.7.4.6	-999.905	1000
r645	ATP[c] + GDP[c] <=> ADP[c] + GTP[c]	2.7.4.6	-1000	1000
r646	GDP[m] + ATP[m] <=> GTP[m] + ADP[m]	2.7.4.6	-1000	997.807
r881	ACCOA[m] + C40COA[m] -> COA[m] + C60COA[m]	2.3.1.16	0	1000
r882	NADH[m] + C60COA[m] <=> NAD[m] + C6HCOA[m]	1.1.1.35	0	1000
r883	C6HCOA[c] <=> C6DCOA[c]	4.2.1.74	-1000	1000
r884	C6HCOA[c] <=> C6DCOA[c]	4.2.1.17	-1000	1000
r885	C6HCOA[m] <=> C6DCOA[m]	4.2.1.17	-1000	1000
r886	NADP[m] + C6DCOA[m] -> NADPH[m] + C60COA[m]	1.3.1.38	0	1000
r887	ACCOA[m] + C60COA[m] -> COA[m] + C80COA[m]	2.3.1.16	0	1000
r888	NADH[m] + C80COA[m] <=> NAD[m] + C8HCOA[m]	1.1.1.35	0	1000
r892	NADP[m] + C8DCOA[m] -> NADPH[m] + C80COA[m]	1.3.1.38	0	1000
r894	NADH[m] + C100COA[m] <=> NAD[m] + C10HCOA[m]	1.1.1.35	0	1000
r895	C10HCOA[c] <=> C10DCOA[c]	4.2.1.74	-1000	1000
r896	C10HCOA[c] <=> C10DCOA[c]	4.2.1.17	-1000	1000
r897	C10HCOA[m] <=> C10DCOA[m]	4.2.1.17	-1000	1000
r898	NADP[m] + C10DCOA[m] -> NADPH[m] + C100COA[m]	1.3.1.38	0	1000
r900	NADH[m] + C120COA[m] <=> NAD[m] + C120HCOA[m]	1.1.1.35	0	1000
r901	C120HCOA[c] <=> C120DCOA[c]	4.2.1.74	-1000	1000
r902	C120HCOA[c] <=> C120DCOA[c]	4.2.1.17	-1000	1000
r903	C120HCOA[m] <=> C120DCOA[m]	4.2.1.17	0	1000
r904	NADP[m] + C120DCOA[m] -> NADPH[m] + C120COA[m]	1.3.1.38	0	1000
r906	NADH[m] + C140COA[m] <=> NAD[m] + C140HCOA[m]	1.1.1.35	0	1000
r907	C140HCOA[c] <=> C140DCOA[c]	4.2.1.74	-1000	1000
r908	C140HCOA[c] <=> C140DCOA[c]	4.2.1.17	-1000	1000
r909	C140HCOA[m] <=> C140DCOA[m]	4.2.1.17	0	1000
r910	NADP[m] + C140DCOA[m] -> NADPH[m] + C140COA[m]	1.3.1.38	0	1000
r912	NADH[m] + C160COA[m] <=> NAD[m] + C160HCOA[m]	1.1.1.35	0	1000
r913	C160HCOA[c] <=> C160DCOA[c]	4.2.1.74	-1000	1000
r914	C160HCOA[c] <=> C160DCOA[c]	4.2.1.17	-1000	1000
r915	C160HCOA[m] <=> C160DCOA[m]	4.2.1.17	0	1000
r916	NADP[m] + C160DCOA[m] -> NADPH[m] + C160COA[m]	1.3.1.38	0	1000
r917	H2O[c] + C160COA[c] -> COA[c] + C160[c]	3.1.2.22	0	998.432
r939	C16HCOA[c] <=> C16DCOA[c]	4.2.1.74	-1000	1000
r940	C16HCOA[c] <=> C16DCOA[c]	4.2.1.17	-1000	1000
r950	C14HCOA[c] <=> C14DCOA[c]	4.2.1.74	-1000	1000
r951	C14HCOA[c] <=> C14DCOA[c]	4.2.1.17	-1000	1000
r961	C12HCOA[c] <=> C12DCOA[c]	4.2.1.74	-1000	1000
r962	C12HCOA[c] <=> C12DCOA[c]	4.2.1.17	-1000	1000
r973	C10HCOA[c] <=> C10DCOA[c]	4.2.1.74	-1000	1000
r974	C10HCOA[c] <=> C10DCOA[c]	4.2.1.17	-1000	1000
r975	C10HCOA[m] <=> C10DCOA[m]	4.2.1.17	-1000	1000
r984	C8HCOA[c] <=> C8DCOA[c]	4.2.1.74	-1000	1000
r985	C8HCOA[c] <=> C8DCOA[c]	4.2.1.17	-1000	1000
r986	C8HCOA[m] <=> C8DCOA[m]	4.2.1.17	0	1000
r989	COA[m] + C8OCOA[m] <=> ACCOA[m] + C60COA[m]	2.3.1.16	0	1000
r995	C6HCOA[c] <=> C6DCOA[c]	4.2.1.74	-1000	1000
r996	C6HCOA[c] <=> C6DCOA[c]	4.2.1.17	-1000	1000
r997	C6HCOA[m] <=> C6DCOA[m]	4.2.1.17	-1000	1000
r1000	COA[m] + C6OCOA[m] <=> ACCOA[m] + C40COA[m]	2.3.1.16	0	1000
r1009	NADH[m] + AACCOA[m] <=> NAD[m] + C4HCOA[m]	1.1.1.35	0	1000
r1178	TAGLY[c] -> TAGLY[e]		0	999.946
r1195	H2O[c] <=> H2O[m]		-1000	1000
r1196	O2[c] <=> O2[m]		-992.949	1000
r1197	NH3[c] <=> NH3[m]		-1000	999.95
r1198	ETH[c] <=> ETH[m]		-998.781	1000
r1200	O2[c] <=> O2[m]		-992.949	1000
r1202	ACAL[c] <=> ACAL[m]		-1000	1000
r1203	PI[c] <=> PI[m]		-999.919	1000
r1204	OIVAL[c] <=> OIVAL[m]		-1000	999.86
r1205	OMVAL[c] <=> OMVAL[m]		-1000	999.95
r1207	THR[m] <=> THR[c]		-1000	999.95
r1208	PYR[c] <=> PYR[m]		-1000	2.87612
r1209	AKG[m] <=> AKG[c]		-1000	1000
r1220	ASP[c] <=> ASP[m]		-1000	1000
r1221	AC[c] <=> AC[m]		-1000	998.729
r1227	OIVAL[c] <=> OIVAL[m]		-1000	999.86
r1229	OMVAL[c] <=> OMVAL[m]		-1000	999.95
r1230	THR[m] <=> THR[c]		-1000	999.95
r1237	THF[c] <=> THF[m]		-999.973	1000
r1239	METTHF[c] <=> METTHF[m]		-1000	999.965
r1241	GLY[m] <=> GLY[c]		-999.965	1000
r1242	SER[m] <=> SER[c]		-1000	999.965
r1244	GLU[c] <=> GLU[m]		-1000	1000
r1251	PYR[c] -> PYR[m]		0	1000
r1252	SUCC[m] <=> SUCC[c]		-1000	1000
r1253	FUM[m] <=> FUM[c]		-1000	1000
r1254	MAL[m] <=> MAL[c]		-1000	1000
r1255	CIT[m] <=> CIT[c]		-1000	1000
r1256	ICIT[m] <=> ICIT[c]		-1000	1000
r1257	AKG[m] <=> AKG[c]		-1000	1000
r1258	OA[c] <=> OA[m]		-1000	1000
r1273	CIT[c] + MAL[m] <=> CIT[m] + MAL[c]		-1000	1000
r1274	CIT[c] + ICIT[m] <=> CIT[m] + ICIT[c]		-1000	1000
r1276	ICIT[m] + MAL[c] -> ICIT[c] + MAL[m]		0	1000
r1277	CIT[m] + MAL[c] -> CIT[c] + MAL[m]		0	1000
r1278	PI[m] + SUCC[c] -> PI[c] + SUCC[m]		0	1000
r1279	SUCC[m] + MAL[c] <=> SUCC[c] + MAL[m]		-1000	1000
r1280	PI[m] + MAL[c] <=> PI[c] + MAL[m]		-1000	999.919
r1281	SUCC[c] + FUM[m] -> SUCC[m] + FUM[c]		0	1000
r1283	ASP[m] + GLU[c] <=> GLU[m] + ASP[c]		-1000	1000
r1284	AKG[m] + MAL[c] <=> AKG[c] + MAL[m]		-1000	1000

## Sheet: never-active
Supplementary File 9: fastFVA results for three types of active reactions sets in iWV1213
Table S9.3: fastFVA results provide never-active reactions sets
Rxn name	Biochemical reaction	EC number	Minimum flux (mmol gDW-1h-1)	Maximum flux (mmol gDW-1h-1)
r1	DGLC[e] <=> 0.33 GLC[e] + 0.67 bDGLC[e]		0	0
r2	DGLC[c] <=> 0.33 GLC[c] + 0.67 bDGLC[c]		0	0
r3	GLC[e] <=> bDGLC[e]	5.1.3.3	0	0
r4	GLC[c] <=> bDGLC[c]	5.1.3.3	0	0
r6	GLC[p] + ATP[p] -> ADP[p] + G6P[p]	2.7.1.1	0	0
r7	ATP[c] + FRU[c] -> ADP[c] + FRU1P[c]	2.7.1.3	0	0
r8	ATP[p] + FRU[p] -> ADP[p] + FRU1P[p]	2.7.1.3	0	0
r10	G6P[c] <=> bDG6P[c]	5.1.3.15	0	0
r19	FDP[c] + H2O[c] -> F6P[c] + PI[c]	3.1.3.11	0	0
r20	ATP[c] + OA[c] -> ADP[c] + PEP[c] + CO2[c]	4.1.1.49	0	0
r26	NAD[m] + GL[m] <=> NADH[m] + GLYAL[m]	1.1.1.1	0	0
r27	GL[e] + NAD[e] <=> GLYAL[e] + NADH[e]	1.1.1.1	0	0
r29	bDG6P[c] + NADP[c] -> NADPH[c] + D6PGL[c]	1.1.1.49	0	0
r30	H2O[c] + D6PGL[c] -> D6PGC[c]	3.1.1.31	0	0
r31	NADP[c] + D6PGC[c] -> CO2[c] + NADPH[c] + RL5P[c]	1.1.1.44	0	0
r37	DEORIPI[c] <=> T3P1[c] + ACAL[c]	4.1.2.4	0	0
r38	ATP[c] + RIB[c] -> ADP[c] + R5P[c]	2.7.1.15	0	0
r39	ATP[c] + GLCNT[c] -> ADP[c] + D6PGC[c]	2.7.1.12	0	0
r40	R5P[c] <=> R1P[c]	5.4.2.2	0	0
r54	SUCC[c] + Q[c] <=> FUM[c] + QH2[c]	1.3.5.1	0	0
r55	FUM[c] + FADH2[m] -> SUCC[c] + FAD[m]	1.3.99.1	0	0
r60	NAD[x] + MAL[x] <=> NADH[x] + OA[x]	1.1.1.37	0	0
r62	ATP[c] + CIT[c] + COA[c] -> ADP[c] + PI[c] + OA[c] + ACCOA[c]	2.3.3.8	0	0
r63	ACCOA[x] + H2O[x] + GLX[x] -> MAL[x] + COA[x]	2.3.3.9	0	0
r64	ACCOA[m] + H2O[m] + GLX[m] -> COA[m] + MAL[m]	2.3.3.9	0	0
r65	H2O[c] + ACCOA[c] + GLX[c] -> COA[c] + MAL[c]	2.3.3.9	0	0
r66	ICIT[x] -> GLX[x] + SUCC[x]	4.1.3.1	0	0
r67	NAD[c] + GLYCOLA[c] <=> NADH[c] + GLX[c]	1.1.1.26	0	0
r68	NAD[c] + GLYCTE[c] <=> NADH[c] + HXPYR[c]	1.1.1.26	0	0
r70	RGT[c] + MTHGXL[c] <=> LGT[c]	4.4.1.5	0	0
r71	H2O[c] + LGT[c] -> RGT[c] + LAC[c]	3.1.2.6	0	0
r72	LGT[e] + H2O[e] -> RGT[e] + LAC[e]	3.1.2.6	0	0
r73	ATP[c] + COA[c] + AC[c] -> ACCOA[c] + AMP[c] + PPI[c]	6.2.1.1	0	0
r74	COA[x] + ATP[x] + AC[x] -> ACCOA[x] + AMP[x] + PPI[x]	6.2.1.1	0	0
r77	NAD[e] + H2O[e] + ACAL[e] <=> NADH[e] + AC[e]	1.2.1.3	0	0
r78	NADP[p] + ACAL[p] + H2O[p] <=> AC[p] + NADPH[p]	1.2.1.5	0	0
r80	NAD[c] + HYGTA[c] -> NADH[c] + FGT[c]	1.1.1.284	0	0
r82	NAD[c] + METHOL[c] <=> NADH[c] + FALD[c]	1.1.1.1	0	0
r83	NAD[m] + METHOL[m] <=> NADH[m] + FALD[m]	1.1.1.1	0	0
r84	NAD[e] + METHOL[e] <=> NADH[e] + FALD[e]	1.1.1.1	0	0
r86	NADP[c] + MAL[c] -> PYR[c] + CO2[c] + NADPH[c]	1.1.1.40	0	0
r87	MAL[m] + NADP[m] -> PYR[m] + CO2[m] + NADPH[m]	1.1.1.40	0	0
r88	NAD[c] + LLAC[c] -> NADH[c] + PYR[c]	1.1.1.27	0	0
r89	LLAC[c] + 2 FERI[c] -> PYR[c] + 2 FERO[c]	1.1.2.3	0	0
r91	H2O[c] + UDPGE[c] -> UDP[c] + GLUCRE[c]	2.4.1.17	0	0
r92	H2O[m] + UDPGE[m] -> UDP[m] + GLUCRE[m]	2.4.1.17	0	0
r93	H2O[x] + UDPGE[x] -> UDP[x] + GLUCRE[x]	2.4.1.17	0	0
r94	H2O[p] + UDPGE[p] -> UDP[p] + GLUCRE[p]	2.4.1.17	0	0
r95	NAD[e] + DEXG[e] <=> NADH[e] + DEHXG[e]	1.1.1.125	0	0
r96	NAD[m] + DEXG[m] <=> NADH[m] + DEHXG[m]	1.1.1.125	0	0
r97	NAD[c] + DEXG[c] <=> NADH[c] + DEHXG[c]	1.1.1.125	0	0
r98	H2O[c] + FGT[c] <=> RGT[c] + FOR[c]	3.1.2.12	0	0
r99	LAC[c] + 2 FERI[c] -> PYR[c] + 2 FERO[c]	1.1.2.4	0	0
r100	LAC[m] + 2 FERI[m] -> PYR[m] + 2 FERO[m]	1.1.2.4	0	0
r101	ATP[c] + COA[c] + PROP[c] -> AMP[c] + PPI[c] + PROPCOA[c]	6.2.1.17	0	0
r102	ATP[m] + PROPCOA[m] + HCO3[m] -> PI[m] + ADP[m] + MMCOA[m]	6.4.1.3	0	0
r103	ATP[x] + PROPCOA[x] + HCO3[x] -> ADP[x] + PI[x] + MMCOA[x]	6.4.1.3	0	0
r104	SAM[c] -> ACPC[c] + 5MTA[c]	4.4.1.14	0	0
r105	SAM[p] -> ACPC[p] + 5MTA[p]	4.4.1.14	0	0
r106	ATP[c] + COA[c] + ACTAC[c] -> AMP[c] + PPI[c] + AACCOA[c]	6.2.1.16	0	0
r108	FAD[m] + HYDGLR[m] <=> AKG[m] + FADH2[m]	1.1.99.2	0	0
r112	CRONYLCOA[c] <=> C4HCOA[c]	4.2.1.17	0	0
r113	MALCOA[c] -> CO2[c] + ACCOA[c]	4.1.1.9	0	0
r114	ATP[c] + GLAC[c] -> ADP[c] + GAL1P[c]	2.7.1.6	0	0
r115	UDPGAL[c] <=> UDPG[c]	5.1.3.2	0	0
r116	UDPGAL[m] <=> UDPG[m]	5.1.3.2	0	0
r118	UDPGE[m] -> CO2[m] + UDPXYL[m]	4.1.1.35	0	0
r119	UDPGE[c] -> CO2[c] + UDPXYL[c]	4.1.1.35	0	0
r121	UDPG[c] + GAL1P[c] <=> UDPGAL[c] + G1P[c]	2.7.7.12	0	0
r122	GLAC[c] + O2[c] -> GALNT[c] + H2O2[c]	1.1.3.9	0	0
r123	ATP[c] + XUL[c] -> ADP[c] + XUL5P[c]	2.7.1.17	0	0
r124	ATP[c] + RL[c] -> ADP[c] + RL5P[c]	2.7.1.47	0	0
r125	NAD[c] + XOL[c] <=> NADH[c] + XUL[c]	1.1.1.9	0	0
r126	NADP[c] + XYL[c] -> NADPH[c] + XYLLAC[c]	1.1.1.179	0	0
r127	NADP[c] + ARAB[c] -> NADPH[c] + ARABLAC[c]	1.1.1.117	0	0
r128	LARAB[e] + ATP[e] -> LARABP[e] + ADP[e]	2.7.1.46	0	0
r130	NADPH[c] + XYL[c] <=> NADP[c] + XOL[c]	1.1.1.21	0	0
r131	ATP[c] + FRU[c] -> ADP[c] + F6P[c]	2.7.1.1	0	0
r132	ATP[p] + FRU[p] -> ADP[p] + F6P[p]	2.7.1.1	0	0
r133	ATP[c] + F6P[c] -> ADP[c] + F26P[c]	2.7.1.105	0	0
r134	H2O[c] + F26P[c] -> F6P[c] + PI[c]	3.1.3.46	0	0
r135	FUCUL1P[c] -> T3P2[c] + LACAL[c]	4.1.2.17	0	0
r136	FUCUL1P[m] -> T3P2[m] + LACAL[m]	4.1.2.17	0	0
r138	MAN1P[m] <=> MAN6P[m]	5.4.2.8	0	0
r140	GTP[m] + MAN1P[m] -> PPI[m] + GDPMAN[m]	2.7.7.13	0	0
r143	NAD[c] + SOT[c] -> FRU[c] + NADH[c]	1.1.1.14	0	0
r144	NAD[m] + SOT[m] -> NADH[m] + FRU[m]	1.1.1.14	0	0
r145	ATP[c] + MAN[c] -> ADP[c] + MAN6P[c]	2.7.1.1	0	0
r146	ATP[p] + MAN[p] -> ADP[p] + MAN6P[p]	2.7.1.1	0	0
r147	GLC[e] + FRU[e] -> GLCLACNE[e] + GLCOL[e]	1.1.99.28	0	0
r148	GLC[c] + FRU[c] -> GLCLACNE[c] + GLCOL[c]	1.1.99.28	0	0
r149	H2O[c] + MELI[c] -> GLC[c] + GLAC[c]	3.2.1.22	0	0
r150	H2O[c] + STAOSE[c] -> GLAC[c] + MELI[c]	3.2.1.22	0	0
r151	GLACMYOI[e] + RAF[e] -> MYOI[e] + STAOSE[e]	2.4.1.67	0	0
r152	G6P[c] + UDPG[c] -> UDP[c] + TRE6P[c]	2.4.1.15	0	0
r153	H2O[c] + TRE[c] -> 2 DGLC[c]	3.2.1.28	0	0
r154	H2O[e] + TRE[e] -> 2 DGLC[e]	3.2.1.28	0	0
r155	H2O[c] + MLT[c] -> 2 GLC[c]	3.2.1.20	0	0
r156	H2O[e] + MLT[e] -> 2 GLC[e]	3.2.1.20	0	0
r157	H2O[c] + SUC[c] -> GLC[c] + FRU[c]	3.2.1.20	0	0
r158	H2O[e] + SUC[e] -> GLC[e] + FRU[e]	3.2.1.20	0	0
r159	H2O[c] + LACT[c] -> GLC[c] + GLAC[c]	3.2.1.23	0	0
r160	H2O[p] + LACT[p] -> GLC[p] + GLAC[p]	3.2.1.23	0	0
r161	H2O[c] + TRE6P[c] -> PI[c] + TRE[c]	3.1.3.12	0	0
r164	UDPG[c] -> UDP[c] + 13GLUCAN[c]	2.4.1.34	0	0
r165	UDPG[p] -> UDP[p] + 13GLUCAN[p]	2.4.1.34	0	0
r166	CELLU[e] -> 14GLUCAN[e] + CELLOB[e]	3.2.1.4	0	0
r167	CELLOB[c] -> bDGLC[c]	3.2.1.21	0	0
r168	14GLUCAN[c] -> bDGLC[c]	3.2.1.21	0	0
r171	STAR[c] -> GLC[c]	3.2.1.3	0	0
r172	STAR[p] -> GLC[p]	3.2.1.3	0	0
r173	STAR[e] -> GLC[e]	3.2.1.3	0	0
r175	ATP[c] + G1P[c] -> PPI[c] + ADPGLC[c]	2.7.7.27	0	0
r176	ADPGLC[m] -> ADP[m] + GLYNIN[m]	2.4.1.21	0	0
r177	ADPGLC[x] -> ADP[x] + GLYNIN[x]	2.4.1.21	0	0
r178	GLYNIN[c] -> STAR[c]	2.4.1.18	0	0
r179	PI[c] + STAR[c] -> G1P[c] + GLYCODEX[c]	2.4.1.1	0	0
r180	STAR[e] + PI[e] -> G1P[e] + GLYCODEX[e]	2.4.1.1	0	0
r181	GLYCODEX[c] -> bDGLC[c]	2.4.1.25	0	0
r182	PI[c] + MLTOSE[c] -> G1P[c] + MLTIOSE[c]	2.4.1.1	0	0
r183	H2O[e] + MLTIOSE[e] -> GLC[e] + MLT[e]	3.2.1.20	0	0
r184	H2O[c] + MLTIOSE[c] -> GLC[c] + MLT[c]	3.2.1.20	0	0
r185	H2O[c] + CHIB[c] -> NAG[c]	3.2.1.52	0	0
r186	H2O[e] + CHIB[e] -> NAG[e]	3.2.1.52	0	0
r187	H2O[c] + CHIT[c] -> CHIB[c]	3.2.1.14	0	0
r188	H2O[p] + CHIT[p] -> CHIB[p]	3.2.1.14	0	0
r189	H2O[e] + CHIT[e] -> CHIB[e]	3.2.1.14	0	0
r190	H2O[c] + CHIT[c] -> NAG[c]	3.2.1.14	0	0
r191	H2O[p] + CHIT[p] -> NAG[p]	3.2.1.14	0	0
r192	H2O[e] + CHIT[e] -> NAG[e]	3.2.1.14	0	0
r194	H2O[c] + GA6P[c] -> F6P[c] + NH3[c]	3.5.99.6	0	0
r195	ATP[c] + GLCN[c] -> ADP[c] + GA6P[c]	2.7.1.1	0	0
r196	ATP[p] + GLCN[p] -> ADP[p] + GA6P[p]	2.7.1.1	0	0
r198	UDPNAG[p] -> UDP[p] + CHIT[p]	2.4.1.16	0	0
r199	UDPNAG[e] -> CHIT[e] + UDP[e]	2.4.1.16	0	0
r201	H2O[e] + CHIT[e] -> AC[e] + CHITO[e]	3.5.1.41	0	0
r202	CHITO[e] -> GLCMNIDE[e]	3.2.1.132	0	0
r203	13GLUCAN[c] -> DGLC[c]	3.2.1.39	0	0
r204	13GLUCAN[e] -> GLC[e]	3.2.1.58	0	0
r205	ACCOA[c] + GA1P[c] -> COA[c] + NAGA1P[c]	2.3.1.157	0	0
r206	PTATE[e] -> GALUNT[e]	3.2.1.15	0	0
r207	O2[c] + 4 ASCOBATE[c] -> 2 H2O[c] + 4 MASCORBATE[c]	1.10.3.3	0	0
r208	4 ASCOBATE[m] + O2[m] -> 2 H2O[m] + 4 MASCORBATE[m]	1.10.3.3	0	0
r209	4 ASCOBATE[e] + O2[e] -> 2 H2O[e] + 4 MASCORBATE[e]	1.10.3.3	0	0
r210	O2[m] + GULACNE[m] -> XYLACNE[m] + H2O2[m]	1.1.3.8	0	0
r211	XYLACNE[m] -> ASCOBATE[m]	1.1.3.8	0	0
r212	2 RGT[c] + MASCORBATE[c] <=> ASCOBATE[c] + RGTDS[c]	1.8.5.1	0	0
r213	CDPDG[p] + MYOI[p] -> CMP[p] + PINS[p]	2.7.8.11	0	0
r214	G6P[c] -> MI1P[c]	5.5.1.4	0	0
r215	MI1P[c] -> PI[c] + MYOI[c]	3.1.3.25	0	0
r216	NAD[c] + MYOI[c] -> NADH[c] + KEMYOI[c]	1.1.1.18	0	0
r217	ATP[c] + PINS[c] -> ADP[c] + PINSP[c]	2.7.1.137	0	0
r218	ATP[c] + PINS[c] -> ADP[c] + PINS4P[c]	2.7.1.67	0	0
r219	ATP[p] + PINS[p] -> ADP[p] + PINS4P[p]	2.7.1.67	0	0
r220	ATP[c] + PINS4P[c] -> ADP[c] + D45PI[c]	2.7.1.68	0	0
r221	ATP[m] + PINS4P[m] -> ADP[m] + D45PI[m]	2.7.1.68	0	0
r222	H2O[p] + TPI[p] -> MYOBISPI[p] + PI[p]	3.1.3.56	0	0
r223	H2O[p] + D45PI[p] -> PINS4P[p] + PI[p]	3.1.3.36	0	0
r224	H2O[c] + D45PI[c] -> PI[c] + PINS4P[c]	3.1.3.36	0	0
r225	MYOI[e] + O2[e] -> H2O[e] + GLUCN[e]	1.13.99.1	0	0
r226	UDPNAG[p] + DOLP[p] <=> UMP[p] + NAGDPD[p]	2.7.8.15	0	0
r227	UDPNAG[c] + NAGDPD[c] <=> UDP[c] + CHIBDPD[c]		0	0
r228	GDPMAN[c] + CHIBDPD[c] <=> GDP[c] + MANCHIBDPD[c]	2.4.1.142	0	0
r229	GDPMAN[c] + MANCHIBDPD[c] <=> GDP[c] + MANDPP[c]	2.4.1.132	0	0
r230	GDPMAN[c] + MANDPP[c] <=> GDP[c] + MANDPPD[c]	2.4.1.257	0	0
r231	2 GDPMAN[p] + MANDPPD[p] <=> 2 GDP[p] + MANNACD[p]	2.4.1.131	0	0
r232	GDPMAN[c] + DOLP[c] <=> GDP[c] + DOLMANP[c]	2.4.1.83	0	0
r233	MANNACD[p] + DOLMANP[p] <=> DOLP[p] + MANNACDD[p]	2.4.1.258	0	0
r234	DOLGPI[p] + MANNACDDD[p] <=> DOLP[p] + GLCAADPP[p]		0	0
r235	DOLGPI[p] + GLCAADPP[p] <=> DOLP[p] + GLCADP[p]	2.4.1.265	0	0
r236	DOLGPI[p] + GLCADP[p] <=> DOLP[p] + GLCADPP[p]	2.4.1.256	0	0
r237	DOLDLS[p] + PROTASN[p] <=> DOLP[p] + GLCPASN[p]		0	0
r238	UDPG[p] + DOLP[p] -> UDP[p] + DOLGPI[p]	2.4.1.117	0	0
r239	H2O[c] + DOLDP[c] -> PI[c] + DOLP[c]	3.6.1.43	0	0
r240	DOLMANP[c] + Protein[c] -> DOLP[c] + MANNP[c]	2.4.1.109	0	0
r241	UDPNAG[p] + PINS[p] <=> UDP[p] + NAGPMIL[p]	2.4.1.198	0	0
r243	ATP[c] + H2O[c] -> ADP[c] + PI[c]	3.6.4.1; 3.6.1.3	0	0
r244	H2O[m] + ATP[m] -> PI[m] + ADP[m]	3.6.4.1; 3.6.1.3	0	0
r246	ATP[c] + H2O[c] + 3.87 H_PO[c] -> ADP[c] + PI[c] + 3.87 H_PO[e]	3.6.3.6	0	0
r249	QH2[c] + 2 FERI[c] + 4 H_PO[c] -> Q[c] + 2 FERO[c] + 4 H_PO[e]	1.10.2.2	0	0
r250	NADPH[c] + 2 FERI[m] -> NADP[c] + 2 FERO[m]	1.6.2.4	0	0
r251	Q[c] + FADH2[m] -> QH2[c] + FAD[m]	1.5.5.1	0	0
r253	2 FERO[c] + 0.5 O2[c] + 4 H_PO[c] -> H2O[c] + 2 FERI[c] + 4 H_PO[e]	1.9.3.1	0	0
r254	2 FERO[p] + 0.5 O2[p] + 4 H_PO[p] -> H2O[p] + 4 H_PO[c] + 2 FERI[p]	1.9.3.1	0	0
r255	PAPS[c] + RTHIO[c] -> OTHIO[c] + H2SO3[c] + PAP[c]	1.8.4.8	0	0
r257	3 NADPH[m] + H2SO3[m] -> 3 H2O[m] + 3 NADP[m] + H2S[m]	1.8.1.2	0	0
r258	H2O[e] + O2[e] + H2SO3[e] -> SLF[e] + H2O2[e]	1.8.3.1	0	0
r261	NADH[c] + 2 FERRIB5[c] -> NAD[c] + 2 FERROB5[c]	1.6.2.2	0	0
r262	3 NADPH[c] + HNO2[c] -> H2O[c] + 3 NADP[c] + NH4OH[c]	1.7.1.4	0	0
r263	NADH[c] + HNO3[c] -> NAD[c] + H2O[c] + HNO2[c]	1.7.1.1	0	0
r264	O2[m] + 2 NITROPRO[m] -> 2 HNO2[m] + 2 ACET[m]	1.13.11.32	0	0
r265	H2O[c] + NH3[c] <=> NH4OH[c]		0	0
r266	H2O[c] + CYNE[c] -> CABM[c]	4.2.1.104	0	0
r267	CABM[c] -> CO2[c] + NH3[c]		0	0
r268	ATN[c] <=> ATT[c]	3.5.2.5	0	0
r269	ATT[c] <=> UGC[c] + UREA[c]	3.5.3.4	0	0
r270	H2O[c] + UREA[c] -> CO2[c] + 2 NH3[c]	3.5.1.5	0	0
r271	NITE[c] -> NH3[c] + CARBO[c]	3.5.5.1	0	0
r277	H2O[c] + O2[c] + DASP[c] -> OA[c] + H2O2[c] + NH3[c]	1.4.3.1	0	0
r278	H2O[e] + O2[e] + DASP[e] -> H2O2[e] + OA[e] + NH3[e]	1.4.3.1	0	0
r279	H2O[c] + O2[c] + GLY[c] -> GLX[c] + H2O2[c] + NH3[c]	1.4.3.3	0	0
r280	H2O[m] + O2[m] + GLY[m] -> GLX[m] + H2O2[m] + NH3[m]	1.4.3.3	0	0
r281	CYS[m] + ECYS[m] -> ALA[m] + ESULFCYS[m]	2.8.1.7	0	0
r285	ATP[c] + ALA[c] + TRNA[c] -> AMP[c] + PPI[c] + LAlaTRNA[c]	6.1.1.7	0	0
r286	ATP[c] + ASP[c] + TRNA[c] -> AMP[c] + PPI[c] + ASPTRNA[c]	6.1.1.12	0	0
r287	ATP[c] + ASN[c] + TRNA[c] -> AMP[c] + PPI[c] + ASNTRNA[c]	6.1.1.22	0	0
r288	ATP[m] + ASN[m] + TRNA[m] -> PPI[m] + AMP[m] + ASNTRNA[m]	6.1.1.22	0	0
r289	H2O[c] + OXOSUCC[c] -> OA[c] + NH3[c]	3.5.1.3	0	0
r290	H2O[c] + OXOGLU[c] -> AKG[c] + NH3[c]	3.5.1.3	0	0
r291	SAM[c] <=> CO2[c] + DSAM[c]	4.1.1.50	0	0
r292	DSAM[c] + PTRSC[c] -> 5MTA[c] + SPRMD[c]	2.5.1.16	0	0
r293	DSAM[c] + SPRMD[c] -> 5MTA[c] + SPRM[c]	2.5.1.22	0	0
r294	GLU[m] + NAGLUS[m] -> AKG[m] + NAORN[m]	2.6.1.11	0	0
r295	GLU[c] + NAGLUS[c] -> AKG[c] + NAORN[c]	2.6.1.11	0	0
r296	H2O[c] + NAORN[c] -> AC[c] + ORN[c]	3.5.1.14	0	0
r300	ARG[c] -> UREA[c] + ORN[c]	3.5.3.1	0	0
r301	H2O[c] + AGMT[c] -> UREA[c] + PTRSC[c]	3.5.3.11	0	0
r303	ATP[p] + GLU[p] -> ADP[p] + GLUP[p]	2.7.2.11	0	0
r305	FAD[m] + PRO[c] -> FADH2[m] + P5C[c]	1.5.99.8	0	0
r307	NADP[c] + GLUGSAL[c] -> NADPH[c] + GLU[c]	1.5.1.12	0	0
r309	GLU[c] + NAORN[c] -> ORN[c] + NAGLU[c]	2.3.1.35	0	0
r310	ACCOA[c] + GLU[c] -> COA[c] + NAGLU[c]	2.3.1.1	0	0
r311	ACCOA[m] + GLU[m] -> COA[m] + NAGLU[m]	2.3.1.1	0	0
r313	ORN[c] -> CO2[c] + PTRSC[c]	4.1.1.17	0	0
r314	ACCOA[c] + PTRSC[c] -> COA[c] + APRUT[c]	2.3.1.57	0	0
r315	H2O[c] + O2[c] + APRUT[c] -> H2O2[c] + NH3[c] + AABUTNOL[c]	1.4.3.4	0	0
r316	ATP[c] + TRNA[c] + ARG[c] -> AMP[c] + PPI[c] + ALTRNA[c]	6.1.1.19	0	0
r317	ATP[m] + TRNA[m] + ARG[m] -> PPI[m] + AMP[m] + ALTRNA[m]	6.1.1.19	0	0
r318	ATP[c] + TRNA[c] + PRO[c] -> AMP[c] + PPI[c] + LPROTRNA[c]	6.1.1.15	0	0
r319	ATP[m] + TRNA[m] + PRO[m] -> PPI[m] + AMP[m] + LPROTRNA[m]	6.1.1.15	0	0
r321	ORN[m] <=> NH3[m] + PRO[m]	4.3.1.12	0	0
r322	ATP[m] + NAGLU[m] -> ADP[m] + NAGLUP[m]	2.7.2.8	0	0
r323	PI[m] + NADP[m] + NAGLUP[m] -> NADPH[m] + ACGLU5PI[m]	1.2.1.38	0	0
r324	AKG[m] + O2[m] + PRO[m] -> CO2[m] + SUCC[m] + HYPRO[m]	1.14.11.2	0	0
r325	ATP[c] + TRNA[c] + CYS[c] -> AMP[c] + PPI[c] + LCysTRNA[c]	6.1.1.16	0	0
r326	H2O[c] + PAP[c] -> PI[c] + AMP[c]	3.1.3.7	0	0
r327	O2[c] + CYS[c] -> 3SULALA[c]	1.13.11.20	0	0
r332	H2S[m] + ASER[m] -> AC[m] + CYS[m]	2.5.1.47	0	0
r334	AKG[c] + CYS[c] <=> GLU[c] + MECPYR[c]	2.6.1.3	0	0
r335	AKG[m] + CYS[m] <=> GLU[m] + MECPYR[m]	2.6.1.3	0	0
r336	SAM[c] + DNACYS[c] <=> SAH[c] + DNAMCYS[c]		0	0
r337	GLU[m] -> CO2[m] + GABA[m]	4.1.1.15	0	0
r338	GLU[c] -> CO2[c] + GABA[c]	4.1.1.15	0	0
r339	O2[c] + DHYXPENT[c] -> FOR[c] + MTHIOBUT[c]	1.13.11.54	0	0
r340	NAD[c] + H2O[c] + SUCCSAL[c] -> NADH[c] + SUCC[c]	1.2.1.16	0	0
r341	NADP[c] + SUCCSAL[c] + H2O[c] -> NADPH[c] + SUCC[c]	1.2.1.16	0	0
r342	NADPH[c] + AKG[c] + GLN[c] -> NADP[c] + 2 GLU[c]	1.4.1.13	0	0
r343	NADH[c] + AKG[c] + GLN[c] -> NAD[c] + 2 GLU[c]	1.4.1.14	0	0
r348	AKG[m] + GABA[m] -> GLU[m] + SUCCSAL[m]	2.6.1.19	0	0
r350	AKG[x] + GABA[x] -> GLU[x] + SUCCSAL[x]	2.6.1.19	0	0
r353	ATP[c] + GLU[c] + TRNA[c] -> AMP[c] + PPI[c] + LGLUTRNA[c]	6.1.1.17	0	0
r354	ATP[m] + GLU[m] + TRNA[m] -> PPI[m] + AMP[m] + LGLUTRNA[m]	6.1.1.17	0	0
r355	ATP[c] + GLN[c] + TRNA[c] -> AMP[c] + PPI[c] + LGLNTRNA[c]	6.1.1.18	0	0
r356	NAD[c] + 3PG[c] -> NADH[c] + PHP[c]	1.1.1.95	0	0
r357	NAD[m] + 3PG[m] -> NADH[m] + PHP[m]	1.1.1.95	0	0
r358	ATP[m] + GLYCTE[m] <=> ADP[m] + 3PG[m]	2.7.1.31	0	0
r359	GLU[c] + PHP[c] -> AKG[c] + 3PSER[c]	2.6.1.52	0	0
r360	3PSER[c] -> PI[c] + SER[c]	3.1.3.3	0	0
r361	GLX[c] + ALA[c] <=> PYR[c] + GLY[c]	2.6.1.44	0	0
r363	NADPH[m] + ASPSA[m] -> NADP[m] + HSER[m]	1.1.1.3	0	0
r367	NAD[m] + GLY[m] + THF[m] -> NADH[m] + CO2[m] + NH3[m] + METTHF[m]	2.1.2.10	0	0
r370	CHO[e] + PQ[e] -> BETALD[e] + PQH2[e]	1.1.99.1	0	0
r371	CHO[c] + PQ[c] -> BETALD[c] + PQH2[c]	1.1.99.1	0	0
r372	H2O[c] + O2[c] + SARC[c] -> FALD[c] + H2O2[c] + GLY[c]	1.5.3.1	0	0
r373	SER[c] + HCYS[c] -> LLCT[c]	4.2.1.22	0	0
r375	ATP[m] + TRNA[m] + SER[m] -> PPI[m] + AMP[m] + LSERTRNA[m]	6.1.1.11	0	0
r376	ATP[c] + TRNA[c] + SER[c] -> AMP[c] + PPI[c] + LSERTRNA[c]	6.1.1.11	0	0
r377	ATP[c] + GLY[c] + TRNA[c] -> AMP[c] + PPI[c] + GLYTRNA[c]	6.1.1.14	0	0
r378	ATP[c] + TRNA[c] + THR[c] -> AMP[c] + PPI[c] + LTHETRNA[c]	6.1.1.3	0	0
r380	THR[c] -> NH3[c] + OBUT[c]	4.3.1.19	0	0
r382	SUCCOA[m] + GLY[m] -> COA[m] + CO2[m] + AMIEVUL[m]	2.3.1.37	0	0
r383	GLY[m] + LIPO[m] <=> CO2[m] + SAP[m]	1.4.4.2	0	0
r384	GLY[c] + LIPO[c] <=> CO2[c] + SAP[c]	1.4.4.2	0	0
r385	SER[c] <=> DSER[c]	5.1.1.18	0	0
r393	ATP[c] + TRNA[c] + HIS[c] -> AMP[c] + PPI[c] + HHTRNA[c]	6.1.1.21	0	0
r394	ARG[x] + NADPH[x] + O2[x] -> CITR[x] + NITOXE[x] + NADP[x]	1.14.13.39	0	0
r399	AKG[m] + ILE[m] <=> GLU[m] + OMVAL[m]	2.6.1.42	0	0
r403	AKG[m] + LEU[m] <=> GLU[m] + OICAP[m]	2.6.1.42	0	0
r405	PYR[c] + OBUT[c] -> CO2[c] + ABUT[c]	2.2.1.6	0	0
r407	2 PYR[c] -> CO2[c] + ACLAC[c]	2.2.1.6	0	0
r412	DHVAL[c] -> OIVAL[c]	4.2.1.9	0	0
r414	DHMVA[c] -> OMVAL[c]	4.2.1.9	0	0
r416	CBHCAP[c] <=> IPPMAL[c]	4.2.1.33	0	0
r417	PPMAL[c] <=> IPPMAL[c]	4.2.1.33	0	0
r419	NAD[m] + COA[m] + OIVAL[m] -> NADH[m] + CO2[m] + ISOBUCOA[m]	1.2.4.4: 1.8.1.4: 2.3.1.168	0	0
r420	NAD[m] + COA[m] + OMVAL[m] -> NADH[m] + CO2[m] + METBUCOA[m]	1.2.4.4: 1.8.1.4: 2.3.1.168	0	0
r421	NAD[m] + COA[m] + OICAP[m] -> NADH[m] + CO2[m] + ISOVACOA[m]	1.2.4.4: 1.8.1.4: 2.3.1.168	0	0
r422	FAD[m] + METBUCOA[m] -> FADH2[m] + MCRCOA[m]	1.3.99.10	0	0
r423	FAD[m] + METBUCOA[c] -> FADH2[m] + MCRCOA[c]	1.3.99.10	0	0
r424	ATP[c] + HCO3[c] + MCRCOA[c] -> ADP[c] + PI[c] + MGCOA[c]	6.4.1.4	0	0
r425	ATP[m] + HCO3[m] + MCRCOA[m] -> PI[m] + ADP[m] + MGCOA[m]	6.4.1.4	0	0
r426	H2O[m] + MGCOA[m] <=> H3MCOA[m]	4.2.1.18	0	0
r427	COA[c] + H3MCOA[c] -> ACCOA[c] + ACTAC[c]	4.1.3.4	0	0
r428	FAD[m] + ISOBUCOA[c] -> FADH2[m] + MCRLCOA[c]	1.3.99.3	0	0
r429	H2O[c] + MCRLCOA[c] -> HYISOBYCOA[c]	4.2.1.17	0	0
r430	H2O[m] + MCRLCOA[m] -> HYISOBYCOA[m]	4.2.1.17	0	0
r431	H2O[m] + HYISOBYCOA[m] -> COA[m] + HYISOBYR[m]	3.1.2.4	0	0
r432	H2O[p] + HYISOBYCOA[p] -> COA[p] + HYISOBYR[p]	3.1.2.4	0	0
r433	NAD[m] + HYISOBYR[m] <=> NADH[m] + MMSHY[m]	1.1.1.31	0	0
r434	NAD[m] + COA[m] + MMSHY[m] -> NADH[m] + CO2[m] + PROPCOA[m]	1.2.1.27	0	0
r435	NAD[c] + COA[c] + MMSHY[c] -> NADH[c] + CO2[c] + PROPCOA[c]	1.2.1.27	0	0
r436	FAD[m] + METBUCOA[c] -> FADH2[m] + MEBUELCOA[c]	1.3.99.3	0	0
r437	H2O[c] + MEBUELCOA[c] -> METBYCOA[c]	4.2.1.17	0	0
r438	H2O[m] + MEBUELCOA[m] -> METBYCOA[m]	4.2.1.17	0	0
r439	NAD[m] + METBYCOA[m] <=> NADH[m] + MCECOA[m]	1.1.1.35	0	0
r440	NAD[p] + METBYCOA[p] <=> NADH[p] + MCECOA[p]	1.1.1.178	0	0
r441	COA[x] + MCECOA[x] -> ACCOA[x] + PROPCOA[x]	2.3.1.16	0	0
r442	COA[m] + MCECOA[m] -> ACCOA[m] + PROPCOA[m]	2.3.1.16	0	0
r443	COA[c] + MCECOA[c] -> ACCOA[c] + PROPCOA[c]	2.3.1.16	0	0
r444	ATP[x] + PROPCOA[x] + HCO3[x] -> ADP[x] + PI[x] + SMMNYLCOA[x]	6.4.1.3	0	0
r445	ATP[m] + PROPCOA[m] + HCO3[m] -> PI[m] + ADP[m] + SMMNYLCOA[m]	6.4.1.3	0	0
r446	ATP[c] + TRNA[c] + ILE[c] -> AMP[c] + PPI[c] + LILEUTRNA[c]	6.1.1.5	0	0
r447	ATP[m] + TRNA[m] + ILE[m] -> PPI[m] + AMP[m] + LILEUTRNA[m]	6.1.1.5	0	0
r448	ATP[c] + TRNA[c] + VAL[c] -> AMP[c] + PPI[c] + LValTRNA[c]	6.1.1.9	0	0
r449	ATP[c] + TRNA[c] + LEU[c] -> AMP[c] + PPI[c] + LLeuTRNA[c]	6.1.1.4	0	0
r450	ATP[m] + TRNA[m] + LEU[m] -> PPI[m] + AMP[m] + LLeuTRNA[m]	6.1.1.4	0	0
r452	ACCOA[m] + H2O[m] + AKG[m] -> COA[m] + HCIT[m]	2.3.3.14	0	0
r457	ATP[p] + NADPH[p] + AMA[p] -> NADP[p] + AMASA[p] + AMP[p] + PPI[p]	1.2.1.31	0	0
r459	NADH[m] + GLU[m] + AMASA[m] <=> NAD[m] + SACP[m]	1.5.1.9	0	0
r465	PYR[c] + ASPSA[c] -> 2 H2O[c] + DIDIPC[c]	4.2.1.52	0	0
r466	ATP[c] + TRNA[c] + LYS[c] -> AMP[c] + PPI[c] + LLTRNA[c]	6.1.1.6	0	0
r467	SAM[c] + HISLYS[c] -> SAH[c] + TMLS[c]	2.1.1.43	0	0
r468	AKG[m] + O2[m] + TMLS[m] -> CO2[m] + SUCC[m] + HTMLS[m]	1.14.11.8	0	0
r469	HTMLS[m] -> GLY[m] + TMAMMOBNAL[m]	4.1.2.-	0	0
r470	NAD[c] + H2O[c] + TMAMMOBNAL[c] <=> NADH[c] + TMAMMOBNATE[c]	1.2.1.3	0	0
r471	NAD[m] + H2O[m] + TMAMMOBNAL[m] <=> NADH[m] + TMAMMOBNATE[m]	1.2.1.3	0	0
r472	AKG[c] + O2[c] + TMAMMOBNATE[c] -> CO2[c] + SUCC[c] + CAR[c]	1.14.11.1	0	0
r474	PI[c] + 5MTA[c] -> 5THR1P[c] + AD[c]	2.4.2.28	0	0
r475	5THR1P[c] -> METHIR1P[c]	5.3.1.23	0	0
r476	METHIR1P[c] -> H2O[c] + METHPENP[c]	4.2.1.109	0	0
r477	METHIR1P[m] -> H2O[m] + METHPENP[m]	4.2.1.109	0	0
r478	H2O[c] + METHPENP[c] -> PI[c] + DHYXPENT[c]	3.1.3.77	0	0
r479	CYS[c] + PHSER[c] -> SUCC[c] + LLCT[c]	2.5.1.48	0	0
r481	HCYS[c] + MTHPTGLU[c] -> THPTGLU[c] + MET[c]	2.1.1.14	0	0
r486	LLCT[c] -> NH3[c] + CYS[c] + OBUT[c]	4.4.1.1	0	0
r487	LLCT[m] -> NH3[m] + CYS[m] + OBUT[m]	4.4.1.1	0	0
r488	SAM[c] + HCYS[c] -> SAH[c] + MET[c]	2.1.1.10	0	0
r489	SAM[c] + CALH[c] -> SAH[c] + DPTH[c]	2.1.1.98	0	0
r490	ATP[c] + TRNA[c] + MET[c] -> AMP[c] + PPI[c] + LMETTRNA[c]	6.1.1.10	0	0
r491	ATP[m] + TRNA[m] + MET[m] -> PPI[m] + AMP[m] + LMETTRNA[m]	6.1.1.10	0	0
r499	3PSME[m] -> PI[m] + CHOR[m]	4.2.3.5	0	0
r501	CHOR[m] + GLN[m] -> PYR[m] + GLU[m] + AN[m]	4.1.3.27	0	0
r508	NADPH[m] + O2[m] + KYN[m] -> H2O[m] + NADP[m] + HKYN[m]	1.14.13.9	0	0
r510	HKYN[c] -> ALA[c] + HAN[c]	3.7.1.3	0	0
r511	O2[c] + HAN[c] -> CMUSA[c]	1.13.11.6	0	0
r515	AKG[m] + TYR[m] <=> GLU[m] + 4HPP[m]	2.6.1.1	0	0
r516	O2[c] + PHE[c] + TTHBOTR[c] -> TYR[c] + HYTTHBOTR[c]	1.14.16.1	0	0
r517	4HPP[c] <=> HYHYPREATE[c]	5.3.2.1	0	0
r518	O2[c] + 4HPP[c] -> CO2[c] + HOMOGEN[c]	1.13.11.27	0	0
r519	O2[c] + HOMOGEN[c] -> MACAC[c]	1.13.11.5	0	0
r520	O2[c] + GEN[c] -> MAYLPYR[c]	1.13.11.4	0	0
r521	MACAC[c] -> FUACAC[c]	5.2.1.2	0	0
r522	FUACAC[c] -> FUM[c] + ACTAC[c]	3.7.1.2	0	0
r523	H2O[c] + ACYLPYR[c] -> PYR[c] + FUM[c]	3.7.1.5	0	0
r524	H2O[m] + ACYLPYR[m] -> PYR[m] + FUM[m]	3.7.1.5	0	0
r525	2 H2O2[x] -> 2 H2O[x] + O2[x]	1.11.1.6	0	0
r526	2 H2O2[c] -> 2 H2O[c] + O2[c]	1.11.1.6	0	0
r527	AKA[c] -> CO2[c] + GLTCOA[c]	1.2.4.2	0	0
r528	AKA[m] -> CO2[m] + GLTCOA[m]	1.2.4.2	0	0
r529	O2[c] + ASPERMD[c] -> H2O2[c] + APRUT[c] + APROA[c]	1.5.3.11	0	0
r530	O2[c] + APRUT[c] -> H2O2[c] + APROA[c] + GABAL[c]	1.5.3.11	0	0
r531	AKG[c] + KYN[c] -> GLU[c] + APEBU[c]	2.6.1.7	0	0
r532	ATP[m] + TRNA[m] + TYR[m] -> PPI[m] + AMP[m] + LTyrTRNA[m]	6.1.1.1	0	0
r533	ATP[c] + TRNA[c] + TYR[c] -> AMP[c] + PPI[c] + LTyrTRNA[c]	6.1.1.1	0	0
r534	ATP[m] + TRNA[m] + TRP[m] -> PPI[m] + AMP[m] + TRPTRNA[m]	6.1.1.2	0	0
r535	ATP[c] + TRNA[c] + TRP[c] -> AMP[c] + PPI[c] + TRPTRNA[c]	6.1.1.2	0	0
r536	ATP[c] + TRNA[c] + PHE[c] -> AMP[c] + PPI[c] + LPheTRNA[c]	6.1.1.20	0	0
r537	4CMCOA[c] -> CAFFCOA[c]	1.14.13.-	0	0
r538	SAM[m] + CAFFCOA[m] -> SAH[m] + FERYLCOA[m]	2.1.1.104	0	0
r539	ACCOA[c] + SERNIN[c] -> COA[c] + NSERNIN[c]	2.3.1.87	0	0
r542	GLU[m] + PHPYR[m] <=> AKG[m] + PHE[m]	2.6.1.57	0	0
r543	ACCOA[c] + PHOPTRIN[c] -> COA[c] + APHOPTRIN[c]	2.3.1.183	0	0
r545	ATP[p] -> PPI[p] + cAMP[p]	4.6.1.1	0	0
r546	ATP[c] -> PPI[c] + cAMP[c]	4.6.1.1	0	0
r561	ATP[c] + DGMP[c] <=> ADP[c] + DGDP[c]	2.7.4.8	0	0
r563	H2O[c] + AMP[c] -> NH3[c] + IMP[c]	3.5.4.6	0	0
r564	H2O[c] + cGMP[c] -> GMP[c]	3.1.4.17	0	0
r565	H2O[p] + cGMP[p] -> GMP[p]	3.1.4.17	0	0
r566	H2O[c] + cAMP[c] -> AMP[c]	3.1.4.17	0	0
r567	H2O[p] + cAMP[p] -> AMP[p]	3.1.4.17	0	0
r568	H2O[c] + ADPRIB[c] -> R5P[c] + AMP[c]	3.6.1.13	0	0
r569	H2O[c] + GN[c] -> NH3[c] + XAN[c]	3.5.4.3	0	0
r570	H2O[e] + GN[e] -> NH3[e] + XAN[e]	3.5.4.3	0	0
r571	H2O[x] + O2[x] + URATE[x] -> H2O2[x] + HIURTE[x]	1.7.3.3	0	0
r572	H2O[p] + HIURTE[p] -> ATN[p] + CO2[p]	3.5.2.17	0	0
r573	H2O[e] + HIURTE[e] -> ATN[e] + CO2[e]	3.5.2.17	0	0
r575	NAD[m] + IMP[m] -> NADH[m] + XMP[m]	1.1.1.205	0	0
r576	H2O[c] + ITP[c] -> PPI[c] + IMP[c]	3.6.1.19	0	0
r577	H2O[c] + DITP[c] -> PPI[c] + DIMP[c]	3.6.1.19	0	0
r578	H2O[c] + GTP[c] -> PPI[c] + GMP[c]	3.6.1.19	0	0
r579	H2O[c] + DGTP[c] -> PPI[c] + DGMP[c]	3.6.1.19	0	0
r580	H2O[c] + XTP[c] -> PPI[c] + XMP[c]	3.6.1.19	0	0
r581	ATP[c] + SLF[c] -> PPI[c] + APS[c]	2.7.7.4	0	0
r582	ATP[m] + SLF[m] -> PPI[m] + APS[m]	2.7.7.4	0	0
r583	ATP[c] + APS[c] -> ADP[c] + PAPS[c]	2.7.1.25	0	0
r584	H2O[c] + PAPS[c] -> SLF[c] + PAYL[c]	3.6.1.9	0	0
r585	ATP[c] + ADP[c] -> PI[c] + APPPPA[c]	2.7.7.53	0	0
r586	H2O[c] + APPPPA[c] -> ATP[c] + AMP[c]	3.6.1.17	0	0
r587	H2O[c] + APPPA[c] -> ADP[c] + AMP[c]	3.6.1.29	0	0
r593	PRPP[c] + URA[c] -> PPI[c] + UMP[c]	2.4.2.9	0	0
r595	GTP[p] + URI[p] <=> UMP[p] + GDP[p]	2.7.1.48	0	0
r597	GTP[c] + CYTD[c] -> GDP[c] + CMP[c]	2.7.1.48	0	0
r598	GTP[p] + CYTD[p] -> CMP[p] + GDP[p]	2.7.1.48	0	0
r599	GTP[m] + CYTD[m] -> GDP[m] + CMP[m]	2.7.1.48	0	0
r601	ATP[p] + URI[p] -> ADP[p] + UMP[p]	2.7.1.48	0	0
r603	H2O[e] + CYTD[e] -> NH3[e] + URI[e]	3.5.4.5	0	0
r604	DC[e] -> NH3[e] + DU[e]	3.5.4.5	0	0
r606	H2O[m] + DUTP[m] -> PPI[m] + DUMP[m]	3.6.1.23	0	0
r609	R5P[c] + URA[c] <=> PURI5P[c]	4.2.1.70	0	0
r612	2 ATP[e] + HCO3[e] + GLN[e] -> 2 ADP[e] + PI[e] + GLU[e] + CAP[e]	6.3.5.5	0	0
r613	H2O[c] + CYTS[c] -> NH3[c] + URA[c]	3.5.4.1	0	0
r614	H2O[m] + CYTS[m] -> NH3[m] + URA[m]	3.5.4.1	0	0
r616	PI[c] + URI[c] <=> R1P[c] + URA[c]	2.4.2.3	0	0
r618	PRPP[c] + AD[c] -> AMP[c] + PPI[c]	2.4.2.7	0	0
r619	PI[c] + DIN[c] <=> HYXN[c] + DR1P[c]	2.4.2.1	0	0
r620	PI[c] + DA[c] <=> AD[c] + DR1P[c]	2.4.2.1	0	0
r621	PI[c] + DG[c] <=> GN[c] + DR1P[c]	2.4.2.1	0	0
r622	R1P[c] + HYXN[c] <=> PI[c] + INS[c]	2.4.2.1	0	0
r623	R1P[c] + AD[c] <=> PI[c] + ADN[c]	2.4.2.1	0	0
r624	R1P[c] + XAN[c] <=> PI[c] + XTSINE[c]	2.4.2.1	0	0
r625	PI[c] + GSN[c] <=> R1P[c] + GN[c]	2.4.2.1	0	0
r628	ATP[m] + AMP[m] <=> 2 ADP[m]	2.7.4.3	0	0
r629	DATP[c] + DAMP[c] <=> 2 DADP[c]	2.7.4.3	0	0
r630	DATP[m] + DAMP[m] <=> 2 DADP[m]	2.7.4.3	0	0
r632	ATP[m] + DGDP[m] <=> ADP[m] + DGTP[m]	2.7.4.6	0	0
r634	ATP[m] + DUDP[m] <=> ADP[m] + DUTP[m]	2.7.4.6	0	0
r636	ATP[m] + DCDP[m] <=> ADP[m] + DCTP[m]	2.7.4.6	0	0
r638	ATP[m] + DTDP[m] <=> ADP[m] + DTTP[m]	2.7.4.6	0	0
r640	ATP[m] + DADP[m] <=> ADP[m] + DATP[m]	2.7.4.6	0	0
r642	ATP[m] + UDP[m] <=> ADP[m] + UTP[m]	2.7.4.6	0	0
r644	ATP[m] + CDP[m] <=> ADP[m] + CTP[m]	2.7.4.6	0	0
r647	ATP[c] + IDP[c] <=> ADP[c] + ITP[c]	2.7.4.6	0	0
r648	ATP[m] + IDP[m] <=> ADP[m] + ITP[m]	2.7.4.6	0	0
r649	PRPP[c] + HYXN[c] -> PPI[c] + IMP[c]	2.4.2.8	0	0
r650	PRPP[c] + GN[c] -> PPI[c] + GMP[c]	2.4.2.8	0	0
r651	DUMP[c] -> PI[c] + DU[c]	3.1.3.5	0	0
r652	DTMP[c] -> PI[c] + DT[c]	3.1.3.5	0	0
r653	DAMP[c] -> PI[c] + DA[c]	3.1.3.5	0	0
r654	DGMP[c] -> PI[c] + DG[c]	3.1.3.5	0	0
r655	DCMP[c] -> PI[c] + DC[c]	3.1.3.5	0	0
r656	CMP[c] -> PI[c] + CYTD[c]	3.1.3.5	0	0
r657	AMP[c] -> PI[c] + ADN[c]	3.1.3.5	0	0
r658	GMP[c] -> PI[c] + GSN[c]	3.1.3.5	0	0
r659	IMP[c] -> PI[c] + INS[c]	3.1.3.5	0	0
r660	XMP[c] -> PI[c] + XTSINE[c]	3.1.3.5	0	0
r661	UMP[c] -> PI[c] + URI[c]	3.1.3.5	0	0
r668	ATP[m] + DCMP[m] <=> ADP[m] + DCDP[m]	2.7.4.14	0	0
r669	ATP[c] + CMP[c] <=> ADP[c] + CDP[c]	2.7.4.14	0	0
r670	ATP[m] + CMP[m] <=> ADP[m] + CDP[m]	2.7.4.14	0	0
r672	ATP[m] + UMP[m] <=> ADP[m] + UDP[m]	2.7.4.14	0	0
r673	H2O[c] + GDP[c] -> PI[c] + GMP[c]	3.6.1.42	0	0
r674	ATP[c] + 2 H2O[c] -> 2 PI[c] + AMP[c]	3.6.1.5	0	0
r687	IPPP[c] + FPP[c] -> PPI[c] + GGPP[c]	2.5.1.29	0	0
r689	NADPH[p] + O2[p] + SQL[p] <=> NADP[p] + S23E[p]	1.14.13.132	0	0
r697	ZYMST[c] -> DMSTL[c]	5.3.3.5	0	0
r704	H2O[c] + ERGOSE[c] -> ERGOST[c] + 0.076 C160[c] + 0.312 C181[c] + 0.281 C182[c] + 0.317 C183[c] + 0.014 C180[c]	3.1.1.13	0	0
r705	S23E[c] -> CCANOL[c]	5.4.99.8	0	0
r706	SAM[c] + CCANOL[c] -> SAH[c] + MCCANOL[c]	2.1.1.41	0	0
r707	3 NADPH[p] + 3 O2[p] + MCCANOL[p] -> 3 NADP[p] + CCECNOL[p]	1.14.13.72	0	0
r708	CCECNOL[c] -> OBSFUL[c]	5.5.1.9	0	0
r709	3 NADPH[c] + 3 O2[c] + OBSFUL[c] -> 4 H2O[c] + 3 NADP[c] + FOR[c] + 45ERSOL[c]	1.14.13.70	0	0
r710	NADPH[p] + 45ERSOL[p] -> NADP[p] + MFEST[p]	1.3.1.70	0	0
r711	MFEST[p] -> MLEPNOL[p]	5.3.3.5	0	0
r712	3 NADPH[p] + 3 O2[p] + MLEPL[p] -> 3 NADP[p] + EPST[p]	1.14.13.72	0	0
r715	H2O[e] + TAGLY[e] -> DAGLY[e] + 0.3544 C160[e] + 0.3423 C181[e] + 0.1421 C182[e] + 0.1201 C183[e] + 0.041 C180[e]	3.1.1.3	0	0
r717	H2O[e] + DAGLY[e] -> 0.2938 C160[e] + 0.3994 C181[e] + 0.1544 C182[e] + 0.1295 C183[e] + 0.0229 C180[e] + MAGLY[e]	3.1.1.3	0	0
r718	0.2938 C160COA[c] + 0.3994 C181COA[c] + 0.1544 C182COA[c] + 0.1295 C183COA[c] + 0.0229 C180COA[c] + GL3P[c] -> COA[c] + DAGLYP[c]	2.3.1.15, 2.3.1.51	0	0
r719	H2O[c] + DAGLYP[c] -> PI[c] + DAGLY[c]	3.1.3.4	0	0
r721	DAGLY[c] + PC[c] -> TAGLY[c] + LPC[c]	2.3.1.158	0	0
r722	ATP[c] + GLYN[c] -> ADP[c] + T3P2[c]	2.7.1.29	0	0
r724	ATP[p] + GL[p] -> ADP[p] + GL3P[p]	2.7.1.30	0	0
r727	SER[p] + C160COA[p] -> COA[p] + CO2[p] + DHSPH[p]	2.3.1.50	0	0
r728	SER[m] + C160COA[m] -> COA[m] + CO2[m] + DHSPH[m]	2.3.1.50	0	0
r729	SER[c] + C160COA[c] -> CO2[c] + COA[c] + DHSPH[c]	2.3.1.50	0	0
r730	NADPH[c] + DHSPH[c] -> NADP[c] + SPH[c]	1.1.1.102	0	0
r731	ACOA[p] + SPH[p] -> COA[p] + CER2[p]	2.3.1.24	0	0
r732	SPH[p] -> PSPH[p]	1.14.-; 1.14.-.-	0	0
r733	CER2[c] -> CER3[c]	1.14.-; 1.14.-.-	0	0
r734	H2O[p] + CER2[p] -> SPH[p] + ACOOH[p]	3.5.1.-	0	0
r735	H2O[e] + SPMYLIN[e] -> CER1[e] + PCHO[e]	3.1.4.12	0	0
r736	H2O[c] + SPMYLIN[c] -> CER1[c] + PCHO[c]	3.1.4.12	0	0
r737	UDPG[p] + CER1[p] -> UDP[p] + GLYLCR[p]	2.4.1.80	0	0
r738	NADPH[p] + O2[p] + PSPH[p] -> NADP[p] + 2 H2O[p] + C18PSPG[p]	1.14.19.4	0	0
r739	ATP[c] + SPH[c] -> ADP[c] + DHSP[c]	2.7.1.91	0	0
r740	ATP[m] + SPH[m] -> ADP[m] + DHSP[m]	2.7.1.91	0	0
r741	ATP[c] + PSPH[c] -> ADP[c] + PHSP[c]	2.7.1.91	0	0
r742	ATP[m] + PSPH[m] -> ADP[m] + PHSP[m]	2.7.1.91	0	0
r743	ATP[c] + SPSE[c] <=> ADP[c] + SHSP[c]	2.7.1.91	0	0
r744	ATP[m] + SPSE[m] <=> ADP[m] + SHSP[m]	2.7.1.91	0	0
r745	DHSP[m] -> PETHM[m] + C16A[m]	4.1.2.27	0	0
r746	PHSP[m] -> PETHM[m] + C16A[m]	4.1.2.27	0	0
r747	PHSP[p] -> PI[p] + PSPH[p]	3.1.3.-	0	0
r748	DHSP[p] -> PI[p] + SPH[p]	3.1.3.-	0	0
r749	SHSP[p] -> PI[p] + SPSE[p]	3.1.3.-	0	0
r750	H2O[e] + CER3[e] -> ACOOH[e] + PSPH[e]	3.5.1.23	0	0
r751	H2O[e] + CER2[e] -> ACOOH[e] + SPH[e]	3.5.1.23	0	0
r752	H2O[e] + CER1[e] -> ACOOH[e] + SPSE[e]	3.5.1.23	0	0
r753	DAGLYP[p] + CTP[p] -> PPI[p] + CLCDPDG[p]	2.7.7.41	0	0
r754	CLCDPDG[e] + GL3P[e] -> CMP[e] + CLPIGP[e]	2.7.8.5	0	0
r755	GL3P[m] + CLCDPDG[m] -> CMP[m] + CLPIGP[m]	2.7.8.5	0	0
r756	H2O[c] + CLPIGP[c] -> PI[c] + PG[c]	3.1.3.27	0	0
r757	CLCDPDG[p] + PG[p] -> CMP[p] + CL[p]	2.7.8.-	0	0
r758	T3P2[c] + 0.243 C160COA[c] + 0.264 C181COA[c] + 0.255 C182COA[c] + 0.209 C183COA[c] + 0.029 C180COA[c] -> COA[c] + AT3P2[c]	2.3.1.42	0	0
r759	T3P2[m] + 0.243 C160COA[m] + 0.264 C181COA[m] + 0.255 C182COA[m] + 0.209 C183COA[m] + 0.029 C180COA[m] -> COA[m] + AT3P2[m]	2.3.1.42	0	0
r760	NADPH[c] + AT3P2[c] -> NADP[c] + LPA[c]	1.1.1.101	0	0
r761	0.243 C160COA[c] + 0.264 C181COA[c] + 0.255 C182COA[c] + 0.209 C183COA[c] + 0.029 C180COA[c] + LPA[c] -> COA[c] + PA[c]	2.3.1.51	0	0
r762	0.243 C160COA[m] + 0.264 C181COA[m] + 0.255 C182COA[m] + 0.209 C183COA[m] + 0.029 C180COA[m] + LPA[m] -> COA[m] + PA[m]	2.3.1.51	0	0
r763	H2O[c] + PA[c] -> PI[c] + DAGLY[c]	3.1.3.4	0	0
r765	ATP[m] + DAGLY[m] -> ADP[m] + PA[m]	2.7.1.107	0	0
r766	DAGLY[c] + CDPETN[c] <=> CMP[c] + PE[c]	2.7.8.1	0	0
r767	CTP[c] + PCHO[c] -> PPI[c] + CDPCHO[c]	2.7.7.15	0	0
r768	ATP[c] + CHO[c] -> ADP[c] + PCHO[c]	2.7.1.32	0	0
r769	SAM[p] + PE[p] -> SAH[p] + PMME[p]	2.1.1.17	0	0
r770	SAM[p] + POFA[p] -> SAH[p] + PMFA[p]	2.1.1.16	0	0
r771	H2O[c] + PC[c] -> 0.057 C160[c] + 0.211 C181[c] + 0.357 C182[c] + 0.361 C183[c] + 0.014 C180[c] + LPC[c]	3.1.1.4	0	0
r773	H2O[c] + PE[c] -> 0.1898 C160[c] + 0.3193 C181[c] + 0.2108 C182[c] + 0.2751 C183[c] + 0.005 C180[c] + LPE[c]	3.1.1.4	0	0
r774	0.1898 C160COA[c] + 0.3193 C181COA[c] + 0.2108 C182COA[c] + 0.2751 C183COA[c] + 0.005 C180COA[c] + LPE[c] -> COA[c] + PE[c]	2.3.1.23	0	0
r775	H2O[c] + LPC[c] -> ACOOH[c] + GLYCEROCHO[c]	3.1.1.5	0	0
r776	H2O[p] + LPC[p] -> ACOOH[p] + GLYCEROCHO[p]	3.1.1.5	0	0
r777	H2O[c] + LPE[c] -> ACOOH[c] + GLYCEROETM[c]	3.1.1.5	0	0
r778	H2O[p] + LPE[p] -> ACOOH[p] + GLYCEROETM[p]	3.1.1.5	0	0
r779	H2O[c] + PC[c] -> CHO[c] + PA[c]	3.1.4.4	0	0
r780	H2O[c] + PC[c] -> CHO[c] + PA[c]	3.1.4.4	0	0
r781	H2O[m] + PC[m] -> PA[m] + CHO[m]	3.1.4.4	0	0
r782	CTP[p] + PA[p] <=> CDPDG[p] + PPI[p]	2.7.7.41	0	0
r783	CTP[c] + PETHM[c] -> PPI[c] + CDPETN[c]	2.7.7.14	0	0
r784	CDPDG[p] + SER[p] <=> CMP[p] + PS[p]	2.7.8.8	0	0
r785	SER[p] + PE[p] -> PS[p] + ETHAM[p]	2.7.8.29	0	0
r786	ATP[c] + ETHAM[c] -> ADP[c] + PETHM[c]	2.7.1.82	0	0
r788	SAM[p] + PMME[p] -> SAH[p] + PDME[p]	2.1.1.71	0	0
r789	SAM[p] + PDME[p] -> SAH[p] + PC[p]	2.1.1.71	0	0
r792	ACCOA[p] + LYSOPAF[p] -> COA[p] + PAF[p]	2.3.1.23; 2.3.1.67	0	0
r793	ATP[c] + HCO3[c] + BCCP[c] -> ADP[c] + PI[c] + CBCCP[c]	6.3.4.14	0	0
r794	ATP[c] + ACCOA[c] + HCO3[c] -> ADP[c] + PI[c] + MALCOA[c]	6.4.1.2	0	0
r795	ACCOA[c] + ACP[c] -> COA[c] + ACACP[c]	2.3.1.38	0	0
r796	MALCOA[c] + ACP[c] -> COA[c] + MALACP[c]	2.3.1.39	0	0
r797	MALCOA[m] + ACP[m] -> COA[m] + MALACP[m]	2.3.1.39	0	0
r798	ACACP[c] + MALACP[c] -> CO2[c] + ACP[c] + AACACP[c]	2.3.1.41	0	0
r799	NADPH[c] + AACACP[c] <=> NADP[c] + C4HACP[c]	1.1.1.100	0	0
r800	NADPH[m] + AACACP[m] <=> NADP[m] + C4HACP[m]	1.1.1.100	0	0
r801	C4HACP[c] <=> H2O[c] + C4DACP[c]	4.2.1.59	0	0
r802	NADH[c] + C4DACP[c] <=> NAD[c] + C40ACP[c]	1.3.1.9	0	0
r803	2 NADPH[c] + ACCOA[c] + MALCOA[c] -> CO2[c] + 2 NADP[c] + COA[c] + C40COA[c]	2.3.1.86	0	0
r804	ACCOA[m] + 2 NADPH[m] + MALCOA[m] -> COA[m] + CO2[m] + 2 NADP[m] + C40COA[m]	2.3.1.86	0	0
r805	MALACP[c] + C40ACP[c] -> CO2[c] + ACP[c] + C6OACP[c]	2.3.1.41	0	0
r806	NADPH[c] + C6OACP[c] <=> NADP[c] + C6HACP[c]	1.1.1.100	0	0
r807	NADPH[m] + C6OACP[m] <=> NADP[m] + C6HACP[m]	1.1.1.100	0	0
r808	C6HACP[c] <=> H2O[c] + C6DACP[c]	4.2.1.59	0	0
r809	NADH[c] + C6DACP[c] <=> NAD[c] + C60ACP[c]	1.3.1.9	0	0
r810	2 NADPH[c] + MALCOA[c] + C40COA[c] -> CO2[c] + 2 NADP[c] + COA[c] + C60COA[c]	2.3.1.86	0	0
r811	2 NADPH[m] + MALCOA[m] + C40COA[m] -> COA[m] + CO2[m] + 2 NADP[m] + C60COA[m]	2.3.1.86	0	0
r812	MALACP[c] + C60ACP[c] -> CO2[c] + ACP[c] + C8OACP[c]	2.3.1.41	0	0
r813	NADPH[c] + C8OACP[c] <=> NADP[c] + C8HACP[c]	1.1.1.100	0	0
r814	NADPH[m] + C8OACP[m] <=> NADP[m] + C8HACP[m]	1.1.1.100	0	0
r815	C8HACP[c] <=> H2O[c] + C8DACP[c]	4.2.1.59	0	0
r816	NADH[c] + C8DACP[c] <=> NAD[c] + C80ACP[c]	1.3.1.9	0	0
r817	2 NADPH[c] + MALCOA[c] + C60COA[c] -> CO2[c] + 2 NADP[c] + COA[c] + C80COA[c]	2.3.1.86	0	0
r818	2 NADPH[m] + MALCOA[m] + C60COA[m] -> COA[m] + CO2[m] + 2 NADP[m] + C80COA[m]	2.3.1.86	0	0
r819	MALACP[c] + C80ACP[c] -> CO2[c] + ACP[c] + C10OACP[c]	2.3.1.41	0	0
r820	NADPH[c] + C10OACP[c] <=> NADP[c] + C10HACP[c]	1.1.1.100	0	0
r821	NADPH[m] + C10OACP[m] <=> NADP[m] + C10HACP[m]	1.1.1.100	0	0
r822	C10HACP[c] <=> H2O[c] + C10DACP[c]	4.2.1.59	0	0
r823	NADH[c] + C10DACP[c] <=> NAD[c] + C100ACP[c]	1.3.1.9	0	0
r824	2 NADPH[c] + MALCOA[c] + C80COA[c] -> CO2[c] + 2 NADP[c] + COA[c] + C100COA[c]	2.3.1.86	0	0
r825	2 NADPH[m] + MALCOA[m] + C80COA[m] -> COA[m] + CO2[m] + 2 NADP[m] + C100COA[m]	2.3.1.86	0	0
r826	MALACP[c] + C100ACP[c] -> CO2[c] + ACP[c] + C12OACP[c]	2.3.1.41	0	0
r827	NADPH[c] + C12OACP[c] <=> NADP[c] + C12HACP[c]	1.1.1.100	0	0
r828	NADPH[m] + C12OACP[m] <=> NADP[m] + C12HACP[m]	1.1.1.100	0	0
r829	C12HACP[c] <=> H2O[c] + C12DACP[c]	4.2.1.59	0	0
r830	NADH[c] + C12DACP[c] <=> NAD[c] + C120ACP[c]	1.3.1.9	0	0
r831	2 NADPH[c] + MALCOA[c] + C100COA[c] -> CO2[c] + 2 NADP[c] + COA[c] + C120COA[c]	2.3.1.86	0	0
r832	2 NADPH[m] + MALCOA[m] + C100COA[m] -> COA[m] + CO2[m] + 2 NADP[m] + C120COA[m]	2.3.1.86	0	0
r833	MALACP[c] + C120ACP[c] <=> CO2[c] + ACP[c] + C14OACP[c]	2.3.1.41	0	0
r834	NADPH[c] + C14OACP[c] <=> NADP[c] + C14HACP[c]	1.1.1.100	0	0
r835	NADPH[m] + C14OACP[m] <=> NADP[m] + C14HACP[m]	1.1.1.100	0	0
r836	C14HACP[c] <=> H2O[c] + C14DACP[c]	4.2.1.59	0	0
r837	NADH[c] + C14DACP[c] <=> NAD[c] + C140ACP[c]	1.3.1.9	0	0
r838	H2O[c] + C140ACP[c] <=> ACP[c] + C140[c]	3.1.2.14	0	0
r839	2 NADPH[c] + MALCOA[c] + C120COA[c] -> CO2[c] + 2 NADP[c] + COA[c] + C140COA[c]	2.3.1.86	0	0
r840	2 NADPH[m] + MALCOA[m] + C120COA[m] -> COA[m] + CO2[m] + 2 NADP[m] + C140COA[m]	2.3.1.86	0	0
r841	MALACP[c] + C140ACP[c] -> CO2[c] + ACP[c] + C16OACP[c]	2.3.1.41	0	0
r842	NADPH[c] + C16OACP[c] <=> NADP[c] + C16HACP[c]	1.1.1.100	0	0
r843	NADPH[m] + C16OACP[m] <=> NADP[m] + C16HACP[m]	1.1.1.100	0	0
r844	C16HACP[c] <=> H2O[c] + C16DACP[c]	4.2.1.59	0	0
r845	NADH[c] + C16DACP[c] <=> NAD[c] + C160ACP[c]	1.3.1.9	0	0
r847	ATP[c] + COA[c] + C160[c] -> AMP[c] + PPI[c] + C160COA[c]	6.2.1.3	0	0
r848	COA[m] + ATP[m] + C160[m] -> PPI[m] + AMP[m] + C160COA[m]	6.2.1.3	0	0
r849	ATP[p] + COA[p] + C160[p] -> AMP[p] + PPI[p] + C160COA[p]	6.2.1.3	0	0
r850	2 NADPH[c] + MALCOA[c] + C140COA[c] -> CO2[c] + 2 NADP[c] + COA[c] + C160COA[c]	2.3.1.86	0	0
r851	2 NADPH[m] + MALCOA[m] + C140COA[m] -> COA[m] + CO2[m] + 2 NADP[m] + C160COA[m]	2.3.1.86	0	0
r852	MALACP[c] + C160ACP[c] -> CO2[c] + ACP[c] + C18OACP[c]	2.3.1.41	0	0
r853	NADPH[c] + C18OACP[c] <=> NADP[c] + C18HACP[c]	1.1.1.100	0	0
r854	NADPH[m] + C18OACP[m] <=> NADP[m] + C18HACP[m]	1.1.1.100	0	0
r855	C18HACP[c] <=> H2O[c] + C18DACP[c]	4.2.1.59	0	0
r856	NADH[c] + C18DACP[c] <=> NAD[c] + C180ACP[c]	1.3.1.9	0	0
r858	2 NADPH[c] + MALCOA[c] + C160COA[c] -> CO2[c] + 2 NADP[c] + COA[c] + C180COA[c]	2.3.1.86	0	0
r859	2 NADPH[m] + C160COA[m] + MALCOA[m] -> COA[m] + CO2[m] + 2 NADP[m] + C180COA[m]	2.3.1.86	0	0
r860	NADH[c] + O2[c] + C160COA[c] -> NAD[c] + 2 H2O[c] + C161COA[c]	1.14.19.1	0	0
r861	O2[p] + NADH[p] + C160COA[p] -> 2 H2O[p] + NAD[p] + C161COA[p]	1.14.19.1	0	0
r863	O2[p] + NADH[p] + C180COA[p] -> 2 H2O[p] + NAD[p] + C181COA[p]	1.14.19.1	0	0
r865	O2[p] + NADH[p] + C181COA[p] -> 2 H2O[p] + NAD[p] + C182COA[p]	1.14.19.6	0	0
r867	O2[p] + NADH[p] + C182COA[p] -> 2 H2O[p] + NAD[p] + C183COA[p]	1.14.19.6	0	0
r869	COA[m] + ATP[m] + C161[m] -> PPI[m] + AMP[m] + C161COA[m]	6.2.1.3	0	0
r870	ATP[p] + COA[p] + C161[p] -> AMP[p] + PPI[p] + C161COA[p]	6.2.1.3	0	0
r872	COA[m] + ATP[m] + C181[m] -> PPI[m] + AMP[m] + C181COA[m]	6.2.1.3	0	0
r873	ATP[p] + COA[p] + C181[p] -> AMP[p] + PPI[p] + C181COA[p]	6.2.1.3	0	0
r875	COA[m] + ATP[m] + C182[m] -> PPI[m] + AMP[m] + C182COA[m]	6.2.1.3	0	0
r876	ATP[p] + COA[p] + C182[p] -> AMP[p] + PPI[p] + C182COA[p]	6.2.1.3	0	0
r878	COA[m] + ATP[m] + C183[m] -> PPI[m] + AMP[m] + C183COA[m]	6.2.1.3	0	0
r879	ATP[p] + COA[p] + C183[p] -> AMP[p] + PPI[p] + C183COA[p]	6.2.1.3	0	0
r893	ACCOA[x] + C80COA[x] -> COA[x] + C100COA[x]	2.3.1.16	0	0
r899	ACCOA[m] + C100COA[m] -> COA[m] + C120COA[m]	2.3.1.16	0	0
r905	ACCOA[m] + C120COA[m] -> COA[m] + C140COA[m]	2.3.1.16	0	0
r911	ACCOA[x] + C140COA[x] -> COA[x] + C160COA[x]	2.3.1.16	0	0
r918	MALCOA[c] + C160COA[c] -> CO2[c] + COA[c] + C180COA[c]	2.3.1.199	0	0
r919	CAR[c] + C120COA[c] <=> COA[c] + C120CAR[c]	2.3.1.7	0	0
r920	C120CAR[c] + CAR[m] <=> CAR[c] + C120CAR[m]		0	0
r921	COA[m] + C120CAR[m] <=> C120COA[m] + CAR[m]	2.3.1.7	0	0
r922	CAR[c] + C140COA[c] <=> COA[c] + C140CAR[c]	2.3.1.7	0	0
r923	CAR[m] + C140CAR[c] <=> CAR[c] + C140CAR[m]		0	0
r924	COA[m] + C140CAR[m] <=> C140COA[m] + CAR[m]	2.3.1.7	0	0
r925	CAR[c] + C160COA[c] <=> COA[c] + C160CAR[c]	2.3.1.21	0	0
r926	CAR[m] + C160CAR[c] <=> CAR[c] + C160CAR[m]		0	0
r927	COA[m] + C160CAR[m] <=> C160COA[m] + CAR[m]	2.3.1.21	0	0
r928	CAR[c] + C180COA[c] <=> COA[c] + C180CAR[c]	2.3.1.7	0	0
r929	CAR[m] + C180CAR[c] <=> CAR[c] + C180CAR[m]		0	0
r930	COA[m] + C180CAR[m] <=> C180COA[m] + CAR[m]	2.3.1.7	0	0
r933	H2O[c] + LEUKA[c] -> LEUKB[c]	3.3.2.6	0	0
r934	O2[m] + C160COA[m] -> H2O2[m] + C16DCOA[m]	1.3.3.6	0	0
r935	O2[x] + C160COA[x] -> H2O2[x] + C16DCOA[x]	1.3.3.6	0	0
r936	O2[c] + C160COA[c] -> H2O2[c] + C16DCOA[c]	1.3.3.6	0	0
r937	O2[p] + C160COA[p] -> H2O2[p] + C16DCOA[p]	1.3.3.6	0	0
r938	FAD[m] + C160COA[c] -> FADH2[m] + C16DCOA[c]	1.3.8.7	0	0
r941	C16HCOA[m] <=> C16DCOA[m]	4.2.1.17	0	0
r942	NADH[m] + C16OCOA[m] <=> NAD[m] + C16HCOA[m]	1.1.1.35	0	0
r943	COA[x] + C16OCOA[x] <=> ACCOA[x] + C140COA[x]	2.3.1.16	0	0
r944	COA[m] + C16OCOA[m] <=> ACCOA[m] + C140COA[m]	2.3.1.16	0	0
r945	O2[m] + C140COA[m] -> H2O2[m] + C14DCOA[m]	1.3.3.6	0	0
r946	O2[x] + C140COA[x] -> H2O2[x] + C14DCOA[x]	1.3.3.6	0	0
r947	O2[c] + C140COA[c] -> H2O2[c] + C14DCOA[c]	1.3.3.6	0	0
r948	O2[p] + C140COA[p] -> H2O2[p] + C14DCOA[p]	1.3.3.6	0	0
r949	FAD[m] + C140COA[c] -> FADH2[m] + C14DCOA[c]	1.3.8.7	0	0
r952	C14HCOA[m] <=> C14DCOA[m]	4.2.1.17	0	0
r953	NADH[m] + C14OCOA[m] <=> NAD[m] + C14HCOA[m]	1.1.1.35	0	0
r954	COA[x] + C14OCOA[x] <=> ACCOA[x] + C120COA[x]	2.3.1.16	0	0
r955	COA[m] + C14OCOA[m] <=> ACCOA[m] + C120COA[m]	2.3.1.16	0	0
r956	O2[m] + C120COA[m] -> H2O2[m] + C12DCOA[m]	1.3.3.6	0	0
r957	O2[x] + C120COA[x] -> H2O2[x] + C12DCOA[x]	1.3.3.6	0	0
r958	O2[c] + C120COA[c] -> H2O2[c] + C12DCOA[c]	1.3.3.6	0	0
r959	O2[p] + C120COA[p] -> H2O2[p] + C12DCOA[p]	1.3.3.6	0	0
r960	FAD[m] + C120COA[c] -> FADH2[m] + C12DCOA[c]	1.3.8.7	0	0
r963	C12HCOA[m] <=> C12DCOA[m]	4.2.1.17	0	0
r964	NADH[m] + C12OCOA[m] <=> NAD[m] + C12HCOA[m]	1.1.1.35	0	0
r965	COA[x] + C12OCOA[x] <=> ACCOA[x] + C100COA[x]	2.3.1.16	0	0
r966	COA[m] + C12OCOA[m] <=> ACCOA[m] + C100COA[m]	2.3.1.16	0	0
r967	C12DCOA[m] <=> C12CCOA[m]	5.3.3.8	0	0
r968	O2[m] + C100COA[m] -> H2O2[m] + C10DCOA[m]	1.3.3.6	0	0
r969	O2[x] + C100COA[x] -> H2O2[x] + C10DCOA[x]	1.3.3.6	0	0
r970	O2[c] + C100COA[c] -> H2O2[c] + C10DCOA[c]	1.3.3.6	0	0
r971	O2[p] + C100COA[p] -> H2O2[p] + C10DCOA[p]	1.3.3.6	0	0
r972	FAD[m] + C100COA[c] -> FADH2[m] + C10DCOA[c]	1.3.8.7	0	0
r976	NADH[m] + C10OCOA[m] <=> NAD[m] + C10HCOA[m]	1.1.1.35	0	0
r977	COA[x] + C10OCOA[x] <=> ACCOA[x] + C80COA[x]	2.3.1.16	0	0
r978	COA[m] + C10OCOA[m] <=> ACCOA[m] + C80COA[m]	2.3.1.16	0	0
r979	O2[m] + C80COA[m] -> H2O2[m] + C8DCOA[m]	1.3.3.6	0	0
r980	O2[x] + C80COA[x] -> H2O2[x] + C8DCOA[x]	1.3.3.6	0	0
r981	O2[c] + C80COA[c] -> H2O2[c] + C8DCOA[c]	1.3.3.6	0	0
r982	O2[p] + C80COA[p] -> H2O2[p] + C8DCOA[p]	1.3.3.6	0	0
r983	FAD[m] + C80COA[c] -> FADH2[m] + C8DCOA[c]	1.3.8.7	0	0
r988	COA[x] + C8OCOA[x] <=> ACCOA[x] + C60COA[x]	2.3.1.16	0	0
r990	O2[m] + C60COA[m] -> H2O2[m] + C6HCOA[m]	1.3.3.6	0	0
r991	O2[x] + C60COA[x] -> H2O2[x] + C6HCOA[x]	1.3.3.6	0	0
r992	O2[c] + C60COA[c] -> H2O2[c] + C6DCOA[c]	1.3.3.6	0	0
r993	O2[p] + C60COA[p] -> H2O2[p] + C6DCOA[p]	1.3.3.6	0	0
r994	FAD[m] + C60COA[c] -> FADH2[m] + C6DCOA[c]	1.3.8.7	0	0
r999	COA[x] + C6OCOA[x] <=> ACCOA[x] + C40COA[x]	2.3.1.16	0	0
r1001	O2[m] + C40COA[m] -> C4HCOA[m] + H2O2[m]	1.3.3.6	0	0
r1002	O2[x] + C40COA[x] -> H2O2[x] + C4HCOA[x]	1.3.3.6	0	0
r1003	O2[c] + C40COA[c] -> H2O2[c] + C4DCOA[c]	1.3.3.6	0	0
r1004	O2[p] + C40COA[p] -> H2O2[p] + C4HCOA[p]	1.3.3.6	0	0
r1005	FAD[m] + C40COA[c] -> FADH2[m] + C4DCOA[c]	1.3.8.7	0	0
r1006	FAD[m] + GLTCOA[m] -> CO2[m] + FADH2[m] + C4DCOA[m]	1.3.8.6	0	0
r1007	C4HCOA[m] <=> C4DCOA[m]	4.2.1.17	0	0
r1008	C4HCOA[c] <=> C4DCOA[c]	4.2.1.17	0	0
r1010	COA[x] + AACCOA[x] <=> 2 ACCOA[x]	2.3.1.9	0	0
r1013	NAD[m] + METTHF[m] -> NADH[m] + METHF[m]	1.5.1.15	0	0
r1014	NAD[c] + METTHF[c] -> NADH[c] + METHF[c]	1.5.1.15	0	0
r1016	ATP[c] + GLU[c] + THF[c] <=> ADP[c] + PI[c] + THFG[c]	6.3.2.17	0	0
r1017	ATP[m] + GLU[m] + THF[m] <=> PI[m] + ADP[m] + THFG[m]	6.3.2.17	0	0
r1018	GTP[c] -> FOR[c] + AHTD[c]	3.5.4.16	0	0
r1019	AHTD[c] -> 3 PI[c] + PYVYLTRIN[c]	4.2.3.12	0	0
r1020	AHTD[m] -> 3 PI[m] + PYVYLTRIN[m]	4.2.3.12	0	0
r1021	2 NADPH[c] + PYVYLTRIN[c] -> 2 NADP[c] + THBOPRIN[c]	1.1.1.153	0	0
r1022	NADP[c] + THBOPRIN[c] -> NADPH[c] + DHBOPRIN[c]	1.5.1.34	0	0
r1023	GLN[c] + CHOR[c] -> GLU[c] + ADCHOR[c]	2.6.1.85	0	0
r1024	PABA[c] + AHHMD[c] -> PPI[c] + DHPT[c]	2.5.1.15	0	0
r1025	PABA[c] + AHHMP[c] -> DHPT[c]	2.5.1.15	0	0
r1026	ATP[c] + GLU[c] + DHPT[c] -> ADP[c] + PI[c] + DHF[c]	6.3.2.12; 6.3.2.17	0	0
r1027	ATP[m] + GLU[m] + DHPT[m] -> PI[m] + ADP[m] + DHF[m]	6.3.2.12; 6.3.2.17	0	0
r1030	H2O[m] + LMETTRNA[m] + FTHF[m] -> THF[m] + FOFMET[m]	2.1.2.9	0	0
r1031	H2O[c] + LMETTRNA[c] + FTHF[c] -> THF[c] + FOFMET[c]	2.1.2.9	0	0
r1033	ATP[c] + FTHF[c] -> ADP[c] + PI[c] + MTHF[c]	6.3.3.2	0	0
r1034	ATP[c] + AHHMP[c] -> AMP[c] + AHHMD[c]	2.7.6.3	0	0
r1035	DHP[c] -> AHHMP[c] + GLAL[c]	4.1.2.25	0	0
r1036	ATP[c] + NADPH[c] + FOR[c] + THF[c] -> ADP[c] + PI[c] + NADP[c] + METTHF[c]	1.5.1.5; 3.5.4.9; 6.3.4.3	0	0
r1037	METTHF[m] + OIVAL[m] -> THF[m] + AKP[m]	2.1.2.11	0	0
r1038	NADPH[c] + AKP[c] -> NADP[c] + PANT[c]	1.1.1.169	0	0
r1039	NADPH[m] + AKP[m] -> NADP[m] + PANT[m]	1.1.1.169	0	0
r1040	ATP[m] + PANT[m] + bALA[m] -> PPI[m] + AMP[m] + PNTO[m]	6.3.2.1	0	0
r1041	ATP[c] + PNTO[c] -> ADP[c] + 4PPNTO[c]	2.7.1.33	0	0
r1042	CYS[c] + CTP[c] + 4PPNTO[c] -> PPI[c] + CMP[c] + 4PPNCYS[c]	6.3.2.5	0	0
r1043	4PPNCYS[c] -> CO2[c] + 4PPNTE[c]	4.1.1.36	0	0
r1044	ATP[m] + 4PPNTE[m] -> PPI[m] + DPCOA[m]	2.7.7.3	0	0
r1045	ATP[c] + DPCOA[c] -> ADP[c] + COA[c]	2.7.1.24	0	0
r1046	AIR[c] -> AHM[c]		0	0
r1047	ATP[c] + AHM[c] -> ADP[c] + AHMP[c]	2.7.1.49	0	0
r1048	ATP[c] + AHMP[c] -> ADP[c] + AHMPP[c]	2.7.4.7	0	0
r1049	ATP[c] + THZ[c] -> ADP[c] + THZP[c]	2.7.1.50	0	0
r1050	AHMPP[c] + THZP[c] -> PPI[c] + THMP[c]	2.5.1.3	0	0
r1051	ATP[c] + THME[c] -> ADP[c] + THMP[c]	2.7.1.89	0	0
r1052	ATP[c] + THMP[c] <=> ADP[c] + THDP[c]	2.7.4.16	0	0
r1053	ATP[c] + THME[c] -> AMP[c] + THDP[c]	2.7.6.2	0	0
r1054	ATP[c] + NIDRINE[c] <=> NAD[c] + PPI[c]	2.7.7.1	0	0
r1055	ATP[c] + NICNUCLE[c] <=> PPI[c] + DMNAD[c]	2.7.7.18	0	0
r1056	ATP[c] + H2O[c] + GLN[c] + DMNAD[c] -> NAD[c] + AMP[c] + PPI[c] + GLU[c]	6.3.5.1	0	0
r1057	H2O[c] + NICD[c] -> NH3[c] + NICNATE[c]	3.5.1.19	0	0
r1058	H2O[c] + PRPP[c] + NICNATE[c] -> PPI[c] + NICNUCLE[c]	2.4.2.11	0	0
r1059	NAD[c] + H2O[c] -> AMP[c] + NMN[c]	3.6.1.22	0	0
r1060	H2O[c] + NMN[c] -> R5P[c] + NICD[c]	3.2.2.14	0	0
r1061	CMUSA[c] -> H2O[c] + QA[c]		0	0
r1062	PRPP[c] + QA[c] -> CO2[c] + PPI[c] + NICNUCLE[c]	2.4.2.19	0	0
r1063	ATP[c] + NAD[c] -> ADP[c] + NADP[c]	2.7.1.23	0	0
r1064	NAD[m] + ATP[m] -> ADP[m] + NADP[m]	2.7.1.23	0	0
r1065	SAM[c] + NICD[c] <=> SAH[c] + METNIC[c]	2.1.1.1	0	0
r1066	ATP[c] + PDXAM[c] -> ADP[c] + PDXAM5PI[c]	2.7.1.35	0	0
r1067	ATP[c] + PDXAL[c] -> ADP[c] + PDXL5PI[c]	2.7.1.35	0	0
r1068	ATP[c] + PDXI[c] -> ADP[c] + PDXIPI[c]	2.7.1.35	0	0
r1069	H2O[c] + O2[c] + PDXIPI[c] -> H2O2[c] + NH3[c] + PDXL5PI[c]	1.4.3.5	0	0
r1070	H2O[c] + O2[c] + PDXAM5PI[c] -> H2O2[c] + NH3[c] + PDXL5PI[c]	1.4.3.5	0	0
r1071	H2O[c] + O2[c] + PDXAL[c] <=> H2O2[c] + NH3[c] + PDXI[c]	1.4.3.5	0	0
r1072	H2O[c] + O2[c] + PDXAL[c] <=> H2O2[c] + NH3[c] + PDXAM[c]	1.4.3.5	0	0
r1073	2 AMIEVUL[c] -> H2O[c] + PPBG[c]	4.2.1.24	0	0
r1074	2 AMIEVUL[m] -> H2O[m] + PPBG[m]	4.2.1.24	0	0
r1075	H2O[c] + 4 PPBG[c] -> 4 NH3[c] + HMTB[c]	2.5.1.61	0	0
r1076	H2O[m] + 4 PPBG[m] -> 4 NH3[m] + HMTB[m]	2.5.1.61	0	0
r1077	HMTB[c] -> H2O[c] + UPGIII[c]	4.2.1.75	0	0
r1078	UPGIII[c] -> 4 CO2[c] + CPGIII[c]	4.1.1.37	0	0
r1079	UPGIII[m] -> 4 CO2[m] + CPGIII[m]	4.1.1.37	0	0
r1080	O2[c] + CPGIII[c] -> 2 H2O[c] + 2 CO2[c] + PPGIX[c]	1.3.3.3	0	0
r1081	3 O2[m] + PPGIX[m] -> 3 H2O[m] + PPRIX[m]	1.3.3.4	0	0
r1082	PPRIX[m] + FE[m] -> PHEME[m]	4.99.1.1	0	0
r1083	PPRIX[c] + FE[c] -> PHEME[c]	4.99.1.1	0	0
r1084	PHEME[p] -> HEME_O[p]	2.5.1.-	0	0
r1085	HEME_O[p] -> HEME_A[p]		0	0
r1086	PHEME[m] + APOCE[m] -> CYMEC[m]	4.4.1.17	0	0
r1087	PHEME[c] + APOCE[c] -> CYMEC[c]	4.4.1.17	0	0
r1088	SAM[c] + UPGIII[c] -> SAH[c] + PRECOR[c]	2.1.1.107	0	0
r1089	NAD[e] + PRECOR[e] -> NADH[e] + SHCR[e]	1.3.1.76	0	0
r1090	SHCR[e] -> SIHM[e]	4.99.1.4	0	0
r1091	CHOR[c] -> PYR[c] + 4HBZ[c]	4.1.3.-	0	0
r1092	ATP[c] + COBNM[c] <=> 3 PI[c] + ADCOBNM[c]	2.5.1.17	0	0
r1093	4HBZ[p] + NPP[p] -> PPI[p] + N4HBZ[p]	2.5.1.-	0	0
r1094	N4HBZ[c] -> CO2[c] + 2NPPP[c]	4.1.1.-	0	0
r1095	O2[c] + 2NPPP[c] -> 2N6H[c]	1.13.14.-	0	0
r1096	SAM[m] + 2N6H[m] -> SAH[m] + 2NPMP[m]	2.1.1.64	0	0
r1097	O2[m] + 2NPMP[m] -> 2NPMB[m]	1.14.13.-	0	0
r1098	SAM[c] + 2NPMB[c] -> SAH[c] + 2NPMMB[c]	2.1.1.-	0	0
r1099	O2[m] + 2NPMMB[m] -> 2NMHMB[m]	1.14.13.-	0	0
r1100	O2[c] + 2NPMMB[c] -> 2NMHMB[c]	1.14.13.-	0	0
r1101	SAM[m] + 2NMHMB[m] -> Q[m] + SAH[m]	2.1.1.64	0	0
r1102	NADPH[c] + O2[c] + 4HBZ[c] -> H2O[c] + NADP[c] + PCACE[c]	1.14.13.2	0	0
r1103	SAM[c] + 2N6H[c] <=> SAH[c] + 2NPMP[c]	2.1.1.222	0	0
r1104	GTP[c] -> PPI[c] + FOR[c] + D6RP5P[c]	3.5.4.25	0	0
r1105	D6RP5P[c] -> NH3[c] + A6RP5P[c]	3.5.4.26	0	0
r1106	D6RP5P[e] -> NH3[c] + A6RP5P[e]	3.5.4.26	0	0
r1107	NADPH[c] + A6RP5P[c] -> NADP[c] + A6RP5P2[c]	1.1.1.193	0	0
r1108	H2O[c] + A6RP5P2[c] -> PI[c] + A6RP[c]	3.1.3.-	0	0
r1109	RL5P[c] -> FOR[c] + DB4P[c]	4.1.99.12	0	0
r1110	A6RP[c] + DB4P[c] -> PI[c] + 2 H2O[c] + D8RL[c]	2.5.1.78	0	0
r1111	D8RL[c] -> A6RP[c] + RIBFLAV[c]	2.5.1.9	0	0
r1112	ATP[c] + RIBFLAV[c] -> ADP[c] + FMN[c]	2.7.1.26	0	0
r1113	ATP[c] + FMN[c] -> PPI[c] + FAD[c]	2.7.7.2	0	0
r1114	FMN[c] -> PI[c] + RIBFLAV[c]	3.1.3.2	0	0
r1115	ATP[c] + COA[c] + 6CARHEX[c] -> AMP[c] + PPI[c] + CHCOA[c]	6.2.1.14	0	0
r1116	ALA[c] + CHCOA[c] -> CO2[c] + COA[c] + AONA[c]	2.3.1.47	0	0
r1117	ALA[m] + CHCOA[m] -> COA[m] + CO2[m] + AONA[m]	2.3.1.47	0	0
r1118	SAM[c] + AONA[c] -> SAMOB[c] + DANNA[c]	2.6.1.62	0	0
r1119	ATP[c] + CO2[c] + DANNA[c] -> ADP[c] + PI[c] + DTB[c]	6.3.3.3	0	0
r1120	2 SAM[c] + DTB[c] + S[c] -> 2 MET[c] + 2 DA[c] + BT[c]	2.8.1.6	0	0
r1121	2 SAM[m] + DTB[m] + S[m] -> 2 MET[m] + BT[m] + 2 DA[m]	2.8.1.6	0	0
r1122	ATP[c] + BT[c] -> PPI[c] + BTAMP[c]	6.3.4.15	0	0
r1123	BTAMP[c] + APOCARB[c] -> AMP[c] + BCCP[c]	6.3.4.15	0	0
r1124	SAM[c] + MALACP[c] -> SAH[c] + MALACP_MES[c]	2.1.1.197	0	0
r1125	CYSTE[c] -> CO2[c] + TAUR[c]	4.1.1.15	0	0
r1126	CYSTE[m] -> CO2[m] + TAUR[m]	4.1.1.15	0	0
r1127	AKG[c] + O2[c] + TAUR[c] -> CO2[c] + SUCC[c] + H2S[c] + AMIACE[c]	1.14.11.17	0	0
r1128	ATP[c] + GLU[c] + CYS[c] -> ADP[c] + PI[c] + GC[c]	6.3.2.2	0	0
r1129	ATP[c] + GLY[c] + GC[c] -> ADP[c] + PI[c] + RGT[c]	6.3.2.3	0	0
r1130	RGT[p] + ALA[p] -> CGLY[p] + ALAGLY[p]	2.3.2.2	0	0
r1131	H2O[c] + CGLY[c] -> GLY[c] + CYS[c]	3.4.11.1	0	0
r1132	ATP[c] + 2 H2O[c] + 5OXOPRO[c] -> ADP[c] + PI[c] + GLU[c]	3.5.2.9	0	0
r1133	2 RGT[c] + H2O2[c] -> 2 H2O[c] + OGT[c]	1.11.1.9	0	0
r1134	RGT[c] + RX[c] -> OGT[c] + HX[c]	2.5.1.18	0	0
r1135	RGT[p] + RX[p] -> HX[p] + OGT[p]	2.5.1.18	0	0
r1136	NADPH[c] + OGT[c] -> NADP[c] + 2 RGT[c]	1.8.1.7	0	0
r1137	H2O[c] + CGLY[c] -> GLY[c] + CYS[c]	3.4.11.2	0	0
r1138	2 SAM[c] + C80ACP[c] + 2 SSC[c] + 2 RFERN[c] -> 2 MET[c] + LIPACP[c] + 2 SCARR[c] + 2 5DA[c] + 2 OFERN[c]	2.8.1.8	0	0
r1139	LIPACP[c] + PROTEIN[c] -> PROTEIN_LIPL[c][c] + ACP[c][c]	2.3.1.181	0	0
r1140	C80ACP[c] + PROTEIN[c] -> ACP[c][c] + PROTEIN_C80L[c][c]	2.3.1.181	0	0
r1141	2 SAM[c] + 2 SSC[c] + 2 RFERN[c] + PROTEIN_C80L[c] -> 2 MET[c] + 2 SCARR[c] + 2 5DA[c] + 2 OFERN[c] + PROTEIN_LIPL[c]	2.8.1.8	0	0
r1142	ATP[c] + LIPIC[c] -> PPI[c] + LIPAMP[c]	2.7.7.63	0	0
r1143	LIPAMP[c] + APOPROT[c] -> AMP[c] + PROTEIN_LIPL[c]	2.7.7.63	0	0
r1151	GLAC[e] <=> GLAC[c]		0	0
r1156	SLF[e] <=> SLF[c]		0	0
r1159	HNO3[e] <=> HNO3[c]		0	0
r1161	UREA[e] <=> UREA[c]		0	0
r1162	XYL[e] <=> XYL[c]		0	0
r1163	ETH[e] <=> ETH[c]		0	0
r1164	METHOL[e] <=> METHOL[c]		0	0
r1165	FRU[e] <=> FRU[c]		0	0
r1166	CELLOB[e] <=> CELLOB[c]		0	0
r1167	AC[e] <=> AC[c]		0	0
r1168	FOR[e] <=> FOR[c]		0	0
r1169	LLAC[e] <=> LLAC[c]		0	0
r1170	LAC[e] <=> LAC[c]		0	0
r1171	DGLC[e] <=> DGLC[c]		0	0
r1172	PYR[c] <=> PYR[e]		0	0
r1173	NADPH[c] <=> NADPH[e]		0	0
r1174	NADH[c] <=> NADH[e]		0	0
r1175	LACT[e] -> LACT[c]		0	0
r1176	GL[e] <=> GL[c]		0	0
r1177	FFA[c] <=> FFA[e]		0	0
r1180	PA[c] <=> PA[e]		0	0
r1181	ERGOSE[c] <=> ERGOSE[e]		0	0
r1182	PE[c] <=> PE[e]		0	0
r1183	PC[c] <=> PC[e]		0	0
r1184	PS[c] <=> PS[e]		0	0
r1186	14GLUCAN[e] <=> 14GLUCAN[c]		0	0
r1189	LPE[e] <=> LPE[c]		0	0
r1190	DAGLY[e] <=> DAGLY[c]		0	0
r1192	ACCOA[c] <=> ACCOA[e]		0	0
r1199	NADH[c] <=> NADH[m]		0	0
r1201	HNO3[c] <=> HNO3[m]		0	0
r1206	GL3P[c] -> GL3P[m]		0	0
r1210	MYOI[p] <=> MYOI[c]		0	0
r1211	PS[p] <=> PS[c]		0	0
r1212	PINS[p] <=> PINS[c]		0	0
r1218	GLN[c] <=> GLN[m]		0	0
r1222	FOR[c] <=> FOR[m]		0	0
r1223	CO2[x] <=> CO2[c]		0	0
r1224	H2O[x] <=> H2O[c]		0	0
r1225	O2[x] <=> O2[c]		0	0
r1226	ORN[c] <=> ORN[m]		0	0
r1228	IPPMAL[c] <=> IPPMAL[m]		0	0
r1231	OICAP[m] <=> OICAP[c]		0	0
r1232	CAP[m] <=> CAP[c]		0	0
r1233	KYN[m] <=> KYN[c]		0	0
r1234	HKYN[m] <=> HKYN[c]		0	0
r1235	DOROA[m] <=> DOROA[c]		0	0
r1236	OROA[m] <=> OROA[c]		0	0
r1238	FTHF[c] <=> FTHF[m]		0	0
r1240	METHF[m] <=> METHF[c]		0	0
r1243	CITR[m] <=> CITR[c]		0	0
r1245	SAM[c] <=> SAM[m]		0	0
r1246	SAH[c] <=> SAH[m]		0	0
r1247	PA[c] <=> PA[m]		0	0
r1250	PROP[c] <=> PROP[m]		0	0
r1259	SUCC[x] -> SUCC[c]		0	0
r1260	MAL[x] -> MAL[c]		0	0
r1261	HIURTE[x] <=> HIURTE[c]		0	0
r1262	AKG[x] <=> AKG[c]		0	0
r1263	ATT[x] <=> ATT[c]		0	0
r1264	UREA[x] <=> UREA[c]		0	0
r1265	PYR[x] <=> PYR[c]		0	0
r1266	PROPCOA[x] <=> PROPCOA[c]		0	0
r1267	GLAL[x] <=> GLAL[c]		0	0
r1268	OA[x] <=> OA[c]		0	0
r1269	XAN[x] <=> XAN[c]		0	0
r1270	UGC[c] <=> UGC[x]		0	0
r1271	H2O2[x] <=> H2O2[c]		0	0
r1272	ADP[c] + PI[c] + ATP[m] -> ATP[c] + PI[m] + ADP[m] + H[m]		0	0
r1275	CIT[c] + PEP[m] <=> PEP[c] + CIT[m]		0	0
r1282	ICIT[c] + MAL[x] -> MAL[c] + ICIT[x]		0	0
r1286	GLAC[e] <=>		0	0
r1287	XYL[e] <=>		0	0
r1288	ETH[e] <=>		0	0
r1289	MLT[e] <=>		0	0
r1290	LACT[e] <=>		0	0
r1291	SUC[e] <=>		0	0
r1292	GL[e] <=>		0	0
r1293	FRU[e] <=>		0	0
r1294	STAR[e] <=>		0	0
r1295	CELLOB[e] <=>		0	0
r1296	CELLU[e] <=>		0	0
r1297	PYR[e] <=>		0	0
r1298	ACCOA[e] <=>		0	0
r1303	NADPH[e] <=>		0	0
r1304	NADH[e] <=>		0	0
r1305	SLF[e] <=>		0	0
r1308	HNO3[e] <=>		0	0
r1309	NH4[e] <=> NH3[e]		0	0
r1310	NH4[e] <=>		0	0
r1311	UREA[e] <=>		0	0
r1313	FFA[e] <=>		0	0
r1314	TAGLY[e] ->		0	0
r1316	ERGOSE[e] <=>		0	0
r1317	PA[e] <=>		0	0
r1318	PE[e] <=>		0	0
r1319	PC[e] <=>		0	0
r1320	PS[e] <=>		0	0
r1323	LPE[e] <=>		0	0
r1324	DAGLY[e] <=>		0	0
